# Supplementary material
Source: publisher figshare collection journal article supplement (https://acs.figshare.com/ndownloader/files/23166131)
Supplement: Supplementary file 1 [file 23166131]

## Sheet: Hoja1
BE:LA
1:1										1:1.5						1:2						1:2.5
ωwater / wt%		ωwater / wt%		ωwater / wt%		ωwater / wt%		ωwater / wt%		ωwater / wt%		ωwater / wt%		ωwater / wt%		ωwater / wt%		ωwater / wt%		ωwater / wt%		ωwater / wt%		ωwater / wt%		ωwater / wt%
2 %		6 %		10 %		17 %		22 %		2 %		10 %		22 %		2 %		10 %		22 %		2 %		10 %		22 %
T / K	η / mPa s	T / K	η / mPa s	T / K	η / mPa s	T / K	η / mPa s	T / K	η / mPa s	T / K	η / mPa s	T / K	η / mPa s	T / K	η / mPa s	T / K	η / mPa s	T / K	η / mPa s	T / K	η / mPa s	T / K	η / mPa s	T / K	η / mPa s	T / K	η / mPa s
298.28	18563.3	285.15	16592	290.68	2136.96	278.643	2111.59	280.3	396.132	300.61	18636.8	290.08	2137.78	280.734	204.549	304.98	18499.4	292.4	2100.97	276.736	263.451	303.6	18743.8	293.65	1404.08	276.901	220.72
298.28	18558.5	285.19	16508.5	290.74	2125.12	278.709	2099.19	280.299	396.024	300.67	18507.6	290.17	2124.78	280.741	204.534	305.04	18353.2	292.5	2086.06	276.736	263.447	303.66	18611.4	293.68	1400.34	276.901	220.719
298.28	18551.2	285.24	16409.2	290.8	2109.9	278.754	2084.52	280.307	395.916	300.73	18356.6	290.21	2109.37	280.734	204.522	305.09	18233.7	292.53	2073.24	276.736	263.192	303.72	18456.4	293.69	1397.13	276.904	220.715
298.28	18550.1	285.28	16324.8	290.86	2097.44	278.828	2073.34	280.307	395.794	300.79	18229.8	290.31	2096.81	280.743	204.518	305.16	18093.3	292.63	2058.15	276.736	263.198	303.78	18328.9	293.72	1393.03	276.905	220.706
298.28	18548	285.32	16227.2	290.94	2081.93	278.879	2060.44	280.316	395.586	300.85	18082.8	290.34	2082.05	280.736	204.492	305.21	17977.4	292.68	2045.94	276.736	262.987	303.84	18179.2	293.73	1389.21	276.905	220.719
298.28	18548.7	285.36	16146.5	291	2069.34	278.96	2048.89	280.319	395.385	300.91	17960.3	290.44	2070.25	280.746	204.477	305.27	17841	292.76	2031.91	276.736	262.787	303.9	18055.1	293.77	1384.79	276.906	220.686
298.28	18549.9	285.41	16053.3	291.08	2053.74	279	2035.36	280.327	395.135	300.97	17819.1	290.48	2055.52	280.738	204.46	305.32	17727.5	292.81	2020.25	276.736	262.781	303.96	17908.6	293.79	1381.41	276.907	220.636
298.28	18548	285.45	15974.8	291.15	2040.89	279.086	2023.79	280.329	394.898	301.03	17700.5	290.56	2043.89	280.748	204.446	305.38	17593.4	292.88	2006.21	276.737	263.545	304.02	17787.7	293.81	1377.18	276.907	220.673
298.29	18543.8	285.5	15883.2	291.24	2025.37	279.132	2010.32	280.338	394.596	301.09	17562.2	290.61	2029.72	280.738	204.42	305.44	17483.6	292.95	1994.17	276.737	263.552	304.08	17645.5	293.83	1373.41	276.908	220.652
298.29	18539.1	285.54	15806.4	291.29	2012.95	279.215	1999.12	280.345	394.325	301.14	17446.7	290.68	2018.24	280.748	204.362	305.49	17354	293	1979.81	276.737	263.527	304.13	17527.8	293.87	1369.04	276.909	220.627
298.29	18531.6	285.58	15717.4	291.38	1997.35	279.252	1985.78	280.355	393.976	301.2	17312.6	290.75	2004.39	280.742	204.319	305.55	17247.4	293.09	1968.58	276.737	263.5	304.19	17389.9	293.87	1365.45	276.91	220.677
298.29	18523.8	285.62	15641.6	291.43	1984.77	279.333	1974.43	280.365	393.614	301.25	17200.2	290.8	1992.98	280.752	204.261	305.6	17122.3	293.13	1955.04	276.737	263.423	304.25	17277	293.92	1360.91	276.912	220.648
298.3	18514	285.66	15553.7	291.51	1968.94	279.376	1960.5	280.374	393.174	301.31	17069.6	290.88	1979.26	280.749	204.222	305.65	17019.7	293.2	1944.4	276.737	263.459	304.3	17144	293.94	1357.72	276.912	220.632
298.3	18503.4	285.7	15478.6	291.57	1956.53	279.44	1949.76	280.386	392.786	301.37	16961.3	290.94	1968.03	280.758	204.158	305.71	16899.3	293.26	1931.53	276.737	263.46	304.36	17033.4	293.97	1353.39	276.913	220.689
298.31	18489.2	285.75	15390.8	291.63	1940.49	279.508	1936.19	280.397	392.31	301.42	16834.9	291.01	1954.84	280.755	204.106	305.76	16799.8	293.33	1920.93	276.737	263.455	304.41	16902.8	293.98	1349.57	276.913	220.665
298.3	18475.5	285.79	15316.9	291.71	1928.38	279.545	1925.64	280.411	391.849	301.48	16729.6	291.07	1944.08	280.764	204.035	305.82	16681.9	293.39	1908.15	276.737	263.184	304.47	16795.5	294.02	1345.1	276.913	220.639
298.32	18457.9	285.83	15232.1	291.76	1913.17	279.616	1912.29	280.423	391.25	301.53	16608.3	291.15	1930.43	280.761	203.981	305.87	16584.3	293.44	1898.06	276.737	263.2	304.52	16671.2	294.03	1341.58	276.914	220.695
298.32	18442.4	285.87	15161.5	291.84	1900.9	279.659	1902.14	280.441	390.73	301.58	16506.6	291.19	1919.81	280.771	203.898	305.92	16469.5	293.52	1886.42	276.737	263.151	304.57	16568.8	294.06	1336.91	276.917	220.689
298.33	18423	285.91	15078.7	291.89	1888.56	279.742	1890.16	280.453	390.101	301.64	16388	291.27	1906.78	280.769	203.827	305.97	16373.4	293.57	1876.52	276.737	262.956	304.63	16448.5	294.09	1333.11	276.918	220.681
298.34	18404.6	285.95	15007.8	291.98	1878.11	279.762	1880.23	280.473	389.531	301.69	16288.9	291.33	1896.71	280.782	203.734	306.03	16260.2	293.63	1864.68	276.737	262.939	304.68	16348.1	294.13	1328.41	276.918	220.683
298.35	18378.7	285.99	14926.4	292.02	1869.85	279.856	1867.87	280.486	388.813	301.74	16173.7	291.4	1884.45	280.779	203.649	306.07	16167.4	293.69	1854.5	276.737	262.771	304.73	16230	294.14	1324.57	276.919	220.692
298.35	18356.4	286.03	14858	292.1	1860.29	279.891	1857.8	280.51	388.17	301.79	16077.4	291.44	1874.51	280.789	203.528	306.13	16057	293.76	1842.63	276.738	263.484	304.78	16132.9	294.18	1319.52	276.92	220.706
298.37	18327.8	286.07	14777.6	292.16	1855.17	279.958	1845.55	280.522	387.379	301.85	15965.7	291.52	1863.02	280.791	203.428	306.18	15965.1	293.8	1833.14	276.738	263.484	304.84	16019.2	294.2	1315.85	276.922	220.714
298.38	18302.7	286.11	14709.6	292.23	1847.18	280.014	1835.5	280.548	386.675	301.9	15871.6	291.56	1853.32	280.8	203.317	306.23	15855.8	293.89	1821.1	276.738	263.499	304.88	15924	294.24	1310.93	276.922	220.678
298.4	18268.2	286.15	14629.4	292.3	1838.87	280.083	1823.93	280.562	385.812	301.95	15761.8	291.64	1841.81	280.801	203.215	306.28	15765.4	293.92	1811.69	276.738	263.377	304.94	15811.4	294.26	1307.08	276.924	220.692
298.4	18241.2	286.19	14561.9	292.37	1830.69	280.123	1814.75	280.591	385.064	302	15670.1	291.69	1832.38	280.808	203.081	306.33	15659.5	294	1800.68	276.738	263.266	304.99	15717.7	294.31	1302.47	276.924	220.715
298.42	18204.3	286.23	14484.3	292.43	1819.75	280.195	1802.9	280.611	384.131	302.05	15564.2	291.75	1821.41	280.812	202.977	306.38	15571.8	294.03	1791.54	276.738	262.991	305.04	15608.7	294.32	1298.61	276.924	220.701
298.43	18171.9	286.27	14419.2	292.5	1810.79	280.246	1793.51	280.639	383.287	302.1	15475.1	291.8	1812.15	280.82	202.836	306.43	15468.8	294.12	1780.49	276.738	262.971	305.09	15518.4	294.36	1293.91	276.925	220.663
298.45	18128.3	286.31	14343.7	292.55	1799.45	280.295	1782.38	280.662	382.258	302.15	15370.4	291.87	1801.15	280.829	202.701	306.47	15383.7	294.15	1771.65	276.738	262.962	305.14	15412.2	294.38	1290.09	276.926	220.713
298.46	18091.9	286.34	14279.5	292.63	1790.88	280.358	1773.31	280.69	381.373	302.2	15284.1	291.94	1792.25	280.836	202.53	306.53	15283.4	294.22	1760.62	276.738	262.79	305.19	15325.4	294.42	1285.79	276.928	220.681
298.49	18045.6	286.38	14204.7	292.67	1777.01	280.409	1762.47	280.718	380.304	302.24	15184.1	291.98	1780.7	280.848	202.377	306.57	15201	294.27	1751.66	276.738	262.687	305.24	15223.6	294.44	1282.03	276.93	220.617
298.5	18005.9	286.42	14141.3	292.75	1768.04	280.457	1753.77	280.746	379.369	302.29	15100.5	292.04	1772.28	280.853	202.195	306.63	15103.3	294.34	1741.51	276.739	263.461	305.28	15138.9	294.49	1277.65	276.931	220.645
298.52	17953.5	286.46	14066.9	292.8	1757.65	280.514	1743.22	280.777	378.215	302.34	15002.4	292.1	1762.32	280.865	202.022	306.67	15022.8	294.38	1733.11	276.739	263.422	305.33	15039.3	294.5	1273.63	276.933	220.597
298.54	17910	286.49	14003.8	292.86	1749.61	280.571	1734.15	280.806	377.207	302.39	14920	292.15	1753.8	280.873	201.813	306.72	14926.3	294.45	1722.47	276.739	263.208	305.38	14957.4	294.54	1268.92	276.937	220.595
298.56	17853.1	286.53	13931.2	292.92	1739.21	280.62	1723.09	280.841	376.01	302.44	14824.7	292.2	1743.64	280.886	201.623	306.76	14847.4	294.48	1714.6	276.739	263.072	305.43	14860.4	294.57	1264.97	276.939	220.571
298.58	17806.2	286.57	13869.7	292.98	1731.55	280.675	1714.73	280.867	374.973	302.48	14744.9	292.26	1735.42	280.892	201.409	306.81	14754.4	294.56	1704.89	276.739	263.035	305.48	14780	294.61	1260.33	276.941	220.587
298.61	17746.2	286.61	13798.5	293.05	1719.29	280.73	1705.06	280.905	373.711	302.53	14651.9	292.32	1724.87	280.905	201.217	306.85	14677.4	294.6	1696.8	276.739	262.985	305.52	14684.4	294.63	1256.29	276.942	220.553
298.62	17697.4	286.64	13738	293.11	1711.19	280.764	1697.22	280.934	372.61	302.58	14573.4	292.36	1716.71	280.911	200.995	306.91	14586.2	294.68	1687.02	276.739	262.578	305.57	14605.5	294.67	1251.5	276.944	220.561
298.66	17633.6	286.68	13668.4	293.18	1699.42	280.842	1687.63	280.976	371.294	302.62	14481.6	292.43	1706.84	280.922	200.796	306.94	14510.9	294.71	1679.21	276.74	263.577	305.61	14512.3	294.7	1247.64	276.949	220.526
298.68	17580.1	286.72	13609.1	293.24	1691.39	280.883	1679.63	281.005	370.158	302.67	14404.5	292.48	1698.17	280.932	200.566	307	14421.7	294.78	1669.68	276.74	263.421	305.66	14435.6	294.74	1242.9	276.949	220.539
298.71	17509.9	286.75	13540	293.29	1680.35	280.941	1670.33	281.046	368.813	302.71	14314.3	292.53	1687.67	280.946	200.36	307.03	14347.9	294.81	1661.6	276.74	263.315	305.7	14346.2	294.76	1239.13	276.951	220.485
298.73	17454.3	286.79	13483	293.36	1672.49	280.981	1662.47	281.077	367.646	302.76	14239	292.6	1679.71	280.956	200.102	307.09	14260.2	294.88	1652.22	276.74	263.183	305.75	14272.1	294.79	1234.55	276.953	220.506
298.77	17383.1	286.82	13418.9	293.41	1662.53	281.041	1653.15	281.118	366.255	302.8	14152.3	292.65	1669.82	280.973	199.871	307.12	14187.8	294.93	1644.05	276.74	262.88	305.8	14185.4	294.82	1230.8	276.956	220.424
298.79	17324	286.86	13364.7	293.47	1654.75	281.088	1645.32	281.15	365.076	302.85	14080	292.7	1662.07	280.981	199.592	307.17	14101	294.98	1635.03	276.74	262.507	305.84	14112.6	294.86	1226.26	276.958	220.462
298.82	17249.6	286.9	13301.9	293.53	1644.82	281.15	1636.21	281.195	363.693	302.89	13995.4	292.76	1653	280.999	199.346	307.21	14029.6	295.03	1627.65	276.74	262.493	305.89	14027.7	294.9	1222.51	276.963	220.369
298.85	17187.1	286.93	13247.5	293.59	1636.79	281.197	1628.46	281.227	362.51	302.94	13924.2	292.8	1645.51	281.004	199.053	307.26	13945.1	295.08	1618.54	276.74	262.504	305.93	13956.9	294.92	1218.09	276.966	220.393
298.88	17107.4	286.97	13184.4	293.64	1627.34	281.249	1619.05	281.273	361.115	302.98	13840.2	292.87	1636.61	281.023	198.792	307.3	13875.4	295.12	1610.89	276.741	263.481	305.97	13873.5	294.95	1214.01	276.968	220.317
298.91	17043.5	287	13129.8	293.69	1619.42	281.295	1611.54	281.306	359.905	303.03	13770.9	292.9	1629.43	281.031	198.493	307.35	13791.7	295.18	1601.72	276.741	262.966	306.02	13804.4	294.97	1209.33	276.971	220.343
298.94	16964.5	287.04	13066.4	293.76	1609.57	281.347	1601.85	281.352	358.474	303.07	13690.2	292.98	1620.69	281.051	198.243	307.39	13723.3	295.23	1594.65	276.741	262.965	306.06	13722.8	295.01	1205.51	276.974	220.274
298.97	16899.2	287.07	13012.3	293.81	1601.73	281.399	1594.75	281.385	357.254	303.12	13622.5	293.01	1613.63	281.059	197.961	307.43	13642.6	295.28	1586.55	276.742	263.555	306.1	13655	295.05	1201.03	276.979	220.3
299.01	16816.3	287.11	12948.8	293.86	1592.25	281.448	1586.62	281.434	355.815	303.16	13543.2	293.08	1604.65	281.08	197.701	307.48	13576.3	295.34	1579.75	276.742	263.496	306.15	13576	295.06	1197.08	276.982	220.22
299.04	16749.3	287.14	12894.9	293.92	1584.82	281.487	1579.66	281.465	354.607	303.2	13477.5	293.1	1597.33	281.089	197.383	307.52	13497.9	295.39	1571.28	276.743	263.563	306.19	13509.5	295.11	1192.57	276.983	220.253
299.07	16666.1	287.18	12833.3	293.98	1576.03	281.545	1570.28	281.517	353.173	303.24	13401.5	293.17	1588.67	281.109	197.104	307.56	13433.5	295.45	1564.48	276.743	263.529	306.23	13431.6	295.12	1188.85	276.989	220.125
299.11	16599.4	287.21	12782	294.04	1569.13	281.596	1563.43	281.55	351.929	303.29	13337.8	293.21	1581.5	281.119	196.773	307.61	13356	295.49	1556.56	276.743	263.486	306.28	13366.9	295.18	1184.59	276.989	220.184
299.14	16517.1	287.24	12722.8	294.09	1560.87	281.64	1555.77	281.599	350.469	303.33	13262.6	293.28	1572.82	281.142	196.479	307.65	13293.8	295.54	1550.11	276.743	262.912	306.32	13290.5	295.18	1181.12	276.997	219.992
299.18	16448.3	287.28	12672.3	294.14	1554.03	281.681	1549.3	281.634	349.228	303.37	13199.4	293.31	1565.94	281.153	196.142	307.69	13220.5	295.59	1542.27	276.744	262.742	306.36	13226.1	295.24	1176.82	277	220.064
299.21	16363.7	287.31	12613.5	294.2	1545.92	281.73	1541.8	281.685	347.807	303.42	13123.8	293.38	1557.87	281.175	195.849	307.73	13160.5	295.65	1535.71	276.744	262.482	306.4	13149.5	295.26	1173.06	277.005	219.882
299.25	16295.4	287.34	12562.8	294.24	1539.33	281.773	1535.2	281.721	346.587	303.45	13061.6	293.42	1551.02	281.187	195.494	307.77	13088.7	295.69	1527.6	276.745	263.575	306.44	13085.4	295.29	1168.71	277.009	219.938
299.28	16209.4	287.38	12503.9	294.31	1531.4	281.831	1526.99	281.77	345.154	303.5	12989.6	293.49	1543.71	281.208	195.187	307.81	13030.4	295.73	1521.07	276.745	262.841	306.48	13011.1	295.34	1165.06	277.013	219.763
299.32	16140.8	287.41	12454.4	294.35	1524.59	281.879	1520.1	281.808	343.919	303.53	12929	293.53	1537.54	281.218	194.823	307.85	12961.1	295.78	1513.12	276.745	262.792	306.53	12950.2	295.36	1160.8	277.016	219.828
299.35	16054.6	287.45	12397.5	294.41	1516.35	281.924	1511.88	281.856	342.459	303.58	12858.6	293.58	1529.64	281.24	194.517	307.89	12903.6	295.82	1506.61	276.746	263.499	306.56	12878	295.4	1157.23	277.024	219.683
299.4	15987.5	287.47	12348.8	294.46	1509.78	281.978	1504.77	281.894	341.211	303.62	12799.7	293.64	1523.39	281.255	194.169	307.94	12835.4	295.89	1499.1	276.746	262.776	306.61	12818.1	295.42	1152.65	277.025	219.719
299.43	15902.6	287.51	12292.5	294.51	1501.34	282.024	1496.56	281.942	339.784	303.66	12730.3	293.68	1515.58	281.275	193.857	307.97	12779.5	295.92	1492.73	276.746	262.393	306.64	12747.3	295.47	1149	277.034	219.63
299.47	15835.5	287.54	12245	294.57	1494.75	282.076	1489.73	281.982	338.573	303.7	12672.3	293.73	1509.09	281.291	193.476	308.02	12713.7	295.97	1485.94	276.746	262.254	306.69	12688.9	295.49	1144.69	277.036	219.563
299.5	15752	287.58	12191.1	294.63	1486.43	282.126	1481.61	282.03	337.169	303.74	12604.5	293.77	1501.08	281.314	193.148	308.05	12659.8	296	1479.83	276.747	263.53	306.72	12620.7	295.54	1141.46	277.044	219.497
299.54	15685	287.6	12145.5	294.68	1479.96	282.167	1475.13	282.068	335.951	303.78	12547.8	293.83	1494.82	281.329	192.774	308.1	12594.6	296.07	1472.41	276.747	262.785	306.77	12564	295.56	1137.29	277.047	219.442
299.57	15602.2	287.64	12092.5	294.71	1471.93	282.216	1467.24	282.117	334.512	303.82	12481	293.86	1486.54	281.349	192.438	308.13	12540.2	296.1	1466.63	276.747	262.298	306.8	12497.9	295.59	1134.16	277.058	219.291
299.62	15536.1	287.67	12047	294.78	1465.39	282.269	1460.78	282.159	333.296	303.85	12425.3	293.94	1479.86	281.366	192.054	308.17	12474.8	296.15	1459.29	276.747	262.264	306.84	12441.7	295.63	1129.86	277.059	219.369
299.65	15455.3	287.7	11994.1	294.81	1458.91	282.312	1453.35	282.205	331.874	303.9	12361.5	293.96	1472.11	281.387	191.728	308.21	12421.1	296.19	1453.54	276.748	262.633	306.88	12376.2	295.66	1126.3	277.072	219.121
299.69	15387.4	287.73	11949.8	294.87	1453.04	282.352	1447.23	282.248	330.671	303.93	12306.6	294.02	1465.97	281.404	191.352	308.25	12358	296.25	1445.91	276.748	262.539	306.92	12321.6	295.7	1122	277.073	219.213
299.72	15302.3	287.77	11898.7	294.92	1445.69	282.404	1439.6	282.293	329.266	303.98	12242	294.07	1458.85	281.425	191.036	308.29	12305	296.29	1439.86	276.749	262.503	306.96	12257.4	295.72	1118.84	277.086	218.959
299.76	15236.3	287.79	11853.7	294.97	1439.88	282.434	1434.05	282.336	328.08	304.01	12188.1	294.12	1453.13	281.444	190.672	308.33	12242.2	296.34	1432.12	276.749	262.505	307	12202.9	295.76	1114.89	277.088	219.044
299.8	15153.4	287.83	11802.4	295.01	1433.36	282.499	1427.42	282.381	326.692	304.06	12125.9	294.17	1446.08	281.463	190.368	308.37	12190.4	296.37	1426.43	276.749	262.233	307.03	12139.1	295.77	1111.55	277.1	218.88
299.84	15089	287.86	11759.2	295.07	1427.78	282.529	1421.46	282.425	325.515	304.09	12073.8	294.21	1440.29	281.482	189.996	308.4	12128.7	296.42	1419.54	276.75	263.426	307.07	12084.6	295.81	1107.27	277.102	218.765
299.87	15008.9	287.89	11710.8	295.12	1420.78	282.585	1414.8	282.468	324.128	304.13	12011.7	294.27	1433.5	281.5	189.685	308.44	12077.2	296.47	1413.75	276.751	262.499	307.11	12020.9	295.83	1103.87	277.113	218.579
299.91	14944.8	287.92	11669.6	295.16	1415.39	282.611	1409.5	282.513	322.966	304.16	11960.4	294.3	1428.1	281.521	189.309	308.48	12016.2	296.52	1407.16	276.752	263.481	307.15	11968.4	295.87	1100.01	277.115	218.68
299.95	14866.2	287.96	11621	295.22	1407.24	282.66	1403.09	282.557	321.625	304.21	11900.3	294.36	1421.22	281.541	188.99	308.52	11966	296.55	1401.69	276.752	263.473	307.19	11906.9	295.9	1096.95	277.13	218.476
299.99	14803.6	287.98	11578.8	295.26	1401.38	282.697	1397.96	282.6	320.494	304.24	11850.5	294.39	1415.43	281.562	188.611	308.55	11906.1	296.6	1395.37	276.753	263.443	307.22	11855.3	295.94	1093.36	277.131	218.351
300.02	14726	288.01	11529.6	295.32	1394.76	282.733	1391.84	282.645	319.162	304.28	11792.1	294.44	1408.66	281.581	188.278	308.59	11856.8	296.64	1390.44	276.753	263.423	307.26	11795.5	295.96	1090.24	277.146	218.085
300.06	14664.6	288.04	11488.5	295.35	1389.14	282.791	1386.13	282.689	318.051	304.31	11743	294.48	1402.9	281.603	187.891	308.63	11798.9	296.7	1384.03	276.753	262.443	307.3	11744.7	296	1086.38	277.148	218.23
300.09	14588.3	288.08	11440.8	295.42	1382.04	282.822	1379.03	282.732	316.758	304.36	11685	294.54	1396.39	281.621	187.563	308.66	11751.3	296.72	1378.94	276.754	262.259	307.34	11685.9	296.02	1083.3	277.167	217.822
300.14	14527	288.1	11400.1	295.45	1376.48	282.876	1373.52	282.774	315.659	304.39	11636.7	294.58	1391.36	281.642	187.198	308.7	11695	296.8	1372.42	276.754	262.252	307.37	11636.7	296.06	1079.88	277.167	217.962
300.17	14451.5	288.14	11352.9	295.51	1370.28	282.919	1366.56	282.819	314.368	304.43	11579.8	294.61	1385.2	281.66	186.876	308.74	11649.3	296.81	1367.27	276.754	262.153	307.41	11578.2	296.09	1076.83	277.184	217.69
300.21	14392	288.16	11312.2	295.55	1364.99	282.96	1360.97	282.859	313.288	304.46	11532.3	294.67	1380.02	281.681	186.504	308.78	11595.4	296.89	1356.17	276.755	263.484	307.44	11529.9	296.13	1073.22	277.185	217.55
300.24	14319	288.2	11265.4	295.61	1358.4	283.021	1354.17	282.902	312.021	304.51	11476.6	294.7	1373.78	281.698	186.185	308.81	11550.6	296.89	1361.3	276.755	262.343	307.48	11473.5	296.15	1070.33	277.201	217.434
300.29	14262.3	288.22	11225.8	295.65	1353.16	283.047	1349.04	282.944	310.947	304.53	11429.6	294.76	1368.62	281.724	185.824	308.85	11496.7	296.97	1344.96	276.755	262.277	307.52	11426.3	296.17	1066.75	277.205	217.292
300.32	14190.4	288.26	11179.1	295.7	1347.48	283.118	1342.42	282.987	309.682	304.58	11374.6	294.79	1362.22	281.741	185.505	308.88	11452.8	296.98	1350.12	276.755	262.047	307.55	11370.8	296.19	1063.5	277.221	217.16
300.36	14132.8	288.28	11140.6	295.75	1342.39	283.13	1337.24	283.028	308.631	304.61	11328.5	294.84	1357.37	281.767	185.124	308.92	11401.2	297.06	1333.46	276.756	262.209	307.59	11324	296.24	1060.09	277.228	217
300.4	14060.7	288.32	11095.7	295.79	1336.5	283.2	1331.09	283.073	307.401	304.65	11274.8	294.87	1351.3	281.786	184.781	308.95	11358	297.06	1338.6	276.757	262.098	307.63	11270	296.27	1056.97	277.242	216.835
300.43	14003.9	288.33	11057	295.83	1331.5	283.22	1325.97	283.114	306.358	304.67	11229.7	294.92	1346.2	281.81	184.383	308.99	11305.6	297.14	1322.92	276.758	263.387	307.66	11224.7	296.31	1053.02	277.249	216.642
300.47	13934	288.38	11012.6	295.9	1325.19	283.28	1319.78	283.15	305.152	304.72	11177.2	294.96	1339.62	281.827	184.047	309.02	11262.5	297.14	1327.72	276.758	263.468	307.7	11171.2	296.32	1049.93	277.267	216.472
300.51	13878.1	288.39	10975.6	295.92	1320.29	283.3	1314.87	283.2	304.118	304.74	11133.2	294.99	1334.49	281.849	183.672	309.06	11211.5	297.21	1311.99	276.758	261.994	307.73	11126.5	296.37	1045.97	277.274	216.267
300.54	13807.6	288.43	10933	295.98	1314.07	283.35	1309.41	283.24	302.938	304.79	11080.6	295.05	1328.73	281.868	183.346	309.09	11168.6	297.22	1316.77	276.759	263.455	307.77	11073.1	296.39	1042.81	277.294	216.087
300.58	13751.4	288.45	10896	296	1309.19	283.38	1304.41	283.28	301.952	304.81	11035.9	295.07	1324.27	281.891	182.967	309.13	11117	297.29	1301.55	276.759	263.493	307.8	11029.1	296.44	1039.1	277.302	215.898
300.62	13680.3	288.49	10852.9	296.07	1302.37	283.43	1298.74	283.32	300.799	304.86	10984.7	295.13	1318.52	281.908	182.655	309.16	11073.7	297.3	1306.16	276.759	261.948	307.84	10978.3	296.46	1036.46	277.317	215.726
300.66	13627.8	288.51	10816.6	296.09	1297.35	283.47	1294.26	283.37	299.823	304.89	10942.4	295.16	1313.79	281.933	182.291	309.2	11023	297.37	1291.9	276.759	261.904	307.87	10936.3	296.5	1032.8	277.329	215.517
300.69	13560.7	288.55	10774.1	296.17	1291.06	283.51	1288.8	283.4	298.664	304.93	10893.5	295.21	1308.13	281.95	181.977	309.23	10980.1	297.38	1296.36	276.76	261.931	307.9	10885.8	296.52	1029.9	277.343	215.345
300.73	13508.8	288.57	10738.4	296.19	1286.32	283.55	1284.41	283.45	297.69	304.95	10851.5	295.24	1303.66	281.974	181.616	309.26	10929.3	297.45	1286.37	276.76	261.915	307.94	10844.2	296.55	1026.61	277.353	215.136
300.77	13443.9	288.61	10697	296.26	1280.53	283.59	1278.88	283.49	296.544	304.99	10801.9	295.3	1298.21	281.99	181.302	309.29	10887	297.47	1282.11	276.76	261.886	307.97	10795.5	296.57	1023.83	277.373	214.955
300.8	13392.2	288.62	10662.6	296.3	1275.8	283.63	1273.89	283.53	295.587	305.02	10760.5	295.34	1293.69	282.017	180.943	309.33	10835.8	297.53	1277.08	276.76	261.879	308	10754.6	296.61	1020.64	277.381	214.732
300.84	13328.4	288.66	10622.4	296.33	1270.36	283.67	1267.03	283.57	294.475	305.06	10711.7	295.39	1288.23	282.033	180.625	309.36	10793.7	297.55	1273.35	276.762	263.298	308.04	10706.5	296.64	1017.84	277.4	214.509
300.87	13277.2	288.68	10587.8	296.38	1265.79	283.71	1261.63	283.61	293.566	305.09	10671.2	295.42	1283.37	282.059	180.253	309.4	10743.7	297.6	1268.13	276.762	261.794	308.07	10665.6	296.67	1014.41	277.411	214.228
300.91	13212.7	288.72	10547.6	296.42	1260.41	283.76	1254.64	283.65	292.47	305.13	10623.8	295.47	1278.07	282.076	179.938	309.43	10702.3	297.63	1263.98	276.763	263.345	308.11	10617.5	296.7	1011.59	277.432	213.996
300.94	13161.7	288.73	10513.2	296.47	1256.42	283.8	1249.2	283.69	291.54	305.15	10584.1	295.5	1273.57	282.104	179.577	309.47	10653.6	297.68	1258.94	276.764	261.847	308.14	10578	296.73	1008.2	277.439	213.716
300.98	13101.9	288.77	10472.6	296.51	1251.34	283.84	1242.42	283.73	290.452	305.19	10537.5	295.56	1267.65	282.118	179.275	309.49	10613.3	297.71	1254.78	276.766	261.643	308.17	10530	296.76	1005.59	277.465	213.474
301.01	13050.8	288.79	10438.2	296.54	1247.02	283.88	1237.02	283.76	289.546	305.22	10498	295.59	1262.95	282.146	178.918	309.53	10565.9	297.75	1249.59	276.767	263.253	308.2	10490.3	296.81	1002.12	277.474	213.18
301.05	12986.1	288.83	10398.4	296.59	1241.48	283.92	1230.44	283.8	288.5	305.26	10451.6	295.63	1257.83	282.161	178.61	309.56	10527	297.77	1245.22	276.768	261.713	308.24	10442.7	296.83	999.716	277.498	212.944
301.08	12935.2	288.85	10364.4	296.63	1236.94	283.97	1225.7	283.84	287.629	305.29	10413.1	295.66	1253.66	282.188	178.249	309.6	10481.2	297.81	1239.78	276.768	261.552	308.27	10404.8	296.86	996.36	277.509	212.659
301.13	12870.2	288.89	10324.5	296.69	1231.69	284	1220.15	283.88	286.607	305.33	10367	295.7	1248.55	282.202	177.938	309.63	10443.3	297.86	1235.3	276.769	263.272	308.3	10359.3	296.88	993.783	277.532	212.408
301.15	12822.8	288.9	10290.6	296.71	1227.34	284.04	1215.84	283.92	285.738	305.35	10329.1	295.73	1244.4	282.229	177.582	309.66	10397.9	297.9	1230.41	276.769	261.515	308.33	10320.6	296.92	990.577	277.544	212.11
301.19	12763.4	288.94	10250.9	296.76	1222.17	284.07	1210.53	283.96	284.712	305.39	10285.2	295.79	1238.99	282.244	177.273	309.69	10360.7	297.95	1226.09	276.771	263.259	308.37	10275.1	296.94	988.084	277.566	211.841
301.22	12716.2	288.95	10218.7	296.81	1217.78	284.11	1206.59	284	283.845	305.42	10248	295.83	1234.9	282.273	176.901	309.72	10316.6	297.98	1221.2	276.771	261.594	308.4	10237.8	296.97	985.009	277.58	211.525
301.27	12658.6	289	10181.6	296.84	1212.46	284.16	1201.7	284.04	282.841	305.45	10204	295.87	1230.5	282.289	176.571	309.75	10280	298.02	1217.34	276.771	261.519	308.43	10194.5	297	982.543	277.603	211.238
301.29	12611.6	289.01	10150.8	296.89	1208.3	284.18	1197.91	284.07	282	305.48	10167.1	295.9	1226.38	282.315	176.206	309.79	10236.7	298.06	1212.56	276.772	261.523	308.46	10159.3	297.01	979.504	277.616	210.897
301.34	12552.9	289.05	10113.2	296.93	1203.49	284.23	1193.5	284.11	281.017	305.52	10124.4	295.95	1221.4	282.332	175.889	309.81	10201.3	298.1	1208.66	276.772	261.515	308.49	10116.9	297.05	976.836	277.643	210.584
301.36	12506	289.07	10082.3	296.97	1199.75	284.25	1189.83	284.15	280.177	305.55	10088.1	295.97	1217.28	282.359	175.549	309.85	10158.6	298.14	1204.35	276.772	261.51	308.52	10080.6	297.07	973.786	277.657	210.225
301.41	12446.5	289.1	10047.2	297.01	1195.07	284.31	1185.49	284.19	279.183	305.58	10045.7	296.03	1212.87	282.375	175.243	309.88	10122.8	298.17	1200.28	276.773	261.486	308.56	10037.8	297.1	971.192	277.683	209.909
301.43	12400.4	289.12	10017.3	297.05	1191.35	284.34	1181.88	284.23	278.334	305.61	10009.7	296.06	1209.03	282.403	174.897	309.91	10080.7	298.21	1195.69	276.774	263.244	308.59	10002.9	297.13	968.026	277.698	209.537
301.48	12342.7	289.16	9981.56	297.1	1186.49	284.38	1177.33	284.27	277.358	305.64	9967.92	296.09	1204.48	282.419	174.589	309.94	10045.6	298.23	1191.99	276.775	261.451	308.62	9961.97	297.16	965.421	277.722	209.214
301.5	12297	289.17	9951.22	297.12	1182.76	284.41	1173.47	284.31	276.534	305.67	9932.66	296.12	1200.51	282.446	174.225	309.98	10004	298.27	1187.29	276.775	261.394	308.65	9928.6	297.18	962.301	277.742	208.833
301.54	12241.3	289.21	9916.6	297.17	1177.95	284.46	1169.01	284.34	275.547	305.71	9891.91	296.16	1195.69	282.464	173.907	310	9970.42	298.3	1183.5	276.776	263.259	308.68	9887.69	297.21	959.551	277.764	208.498
301.57	12197	289.23	9886.88	297.21	1173.94	284.49	1165.44	284.38	274.722	305.74	9857.02	296.2	1191.64	282.492	173.52	310.04	9930.76	298.36	1179.2	276.777	263.19	308.71	9853.43	297.25	956.399	277.786	208.1
301.61	12140.3	289.26	9851.14	297.26	1169.22	284.53	1161.21	284.42	273.762	305.77	9816.12	296.25	1186.84	282.509	173.202	310.07	9897.39	298.38	1175.44	276.777	261.326	308.74	9813.97	297.27	953.744	277.809	207.747
301.64	12096.2	289.28	9821.79	297.28	1165.64	284.58	1157.57	284.46	272.944	305.8	9782.09	296.29	1182.89	282.539	172.846	310.1	9858.44	298.43	1170.71	276.779	263.259	308.77	9781.02	297.31	950.724	277.833	207.326
301.68	12041.4	289.31	9787.47	297.33	1161.24	284.62	1153.19	284.5	271.985	305.83	9742.31	296.33	1177.95	282.556	172.529	310.13	9825.51	298.45	1167.01	276.779	261.266	308.8	9740.24	297.33	948.43	277.857	206.946
301.7	11996	289.33	9758.34	297.37	1157.46	284.65	1149.44	284.53	271.176	305.86	9709.06	296.36	1174.12	282.584	172.145	310.16	9787	298.5	1162.35	276.78	261.201	308.83	9707.14	297.36	945.772	277.878	206.495
301.75	11941.6	289.36	9724.14	297.4	1152.89	284.68	1145.52	284.57	270.243	305.89	9670.77	296.4	1169.57	282.601	171.83	310.19	9754.82	298.52	1158.58	276.78	261.159	308.87	9667.83	297.38	943.218	277.905	206.098
301.77	11898.2	289.38	9694.73	297.45	1149.21	284.72	1141.87	284.61	269.457	305.92	9638.34	296.44	1165.72	282.626	171.457	310.22	9716.02	298.57	1154.29	276.78	261.108	308.89	9635.4	297.41	940.271	277.927	205.638
301.81	11844.2	289.41	9660.89	297.48	1144.65	284.76	1137.87	284.65	268.509	305.95	9599.67	296.48	1161.25	282.644	171.153	310.24	9683.75	298.6	1150.63	276.781	261.126	308.93	9595.55	297.44	938.051	277.953	205.246
301.84	11799.7	289.43	9632.66	297.53	1141.16	284.8	1134.02	284.68	267.714	305.98	9567.42	296.52	1157.87	282.669	170.798	310.28	9645.68	298.63	1146.41	276.781	261.119	308.95	9563.48	297.47	935.438	277.981	204.787
301.88	11744.7	289.46	9599.96	297.55	1136.54	284.83	1128.91	284.72	266.776	306.01	9529.46	296.55	1153.45	282.689	170.49	310.3	9613.26	298.66	1142.98	276.781	261.101	308.99	9526.19	297.51	933.226	278.001	204.393
301.9	11702	289.49	9572.56	297.6	1132.71	284.86	1125.34	284.76	266	306.04	9497.22	296.58	1149.86	282.716	170.126	310.34	9574.55	298.7	1138.48	276.781	261.073	309.01	9495.93	297.53	930.477	278.03	203.937
301.94	11650.1	289.51	9538.87	297.64	1128.13	284.89	1120.82	284.8	265.087	306.07	9460.07	296.63	1145.25	282.736	169.604	310.36	9543.62	298.74	1135.09	276.782	263.087	309.05	9459.62	297.57	928.053	278.049	203.541
301.97	11609.4	289.54	9510.41	297.68	1124.59	284.93	1117.35	284.84	264.329	306.1	9428.84	296.66	1141.75	282.762	169.315	310.4	9507.4	298.78	1131.13	276.784	261.04	309.07	9429.17	297.58	924.871	278.08	203.075
302.01	11560.3	289.56	9477.86	297.7	1119.87	284.97	1112.4	284.87	263.422	306.13	9392.27	296.71	1137.64	282.783	169.024	310.42	9477.58	298.82	1127.95	276.785	263.226	309.1	9391.78	297.63	922.685	278.099	202.67
302.03	11520.2	289.59	9450.2	297.74	1116.12	285	1108.75	284.91	262.652	306.16	9360.99	296.73	1134.44	282.806	168.694	310.45	9440.25	298.85	1124.02	276.785	261.004	309.13	9360.91	297.65	919.894	278.131	202.207
302.07	11470.3	289.61	9418.35	297.78	1111.91	285.03	1104.19	284.95	261.746	306.19	9324.31	296.77	1130.33	282.831	168.407	310.48	9409.93	298.89	1120.85	276.787	260.947	309.16	9324.17	297.69	917.564	278.15	201.792
302.1	11429.8	289.64	9391	297.81	1108.38	285.07	1100.39	284.98	260.986	306.22	9293.84	296.8	1126.89	282.855	168.081	310.51	9374.13	298.92	1116.75	276.787	260.806	309.19	9293.69	297.69	914.493	278.183	201.314
302.14	11377.5	289.66	9359.05	297.87	1104.9	285.1	1096.16	285.02	260.094	306.25	9258.19	296.84	1122.7	282.879	167.807	310.53	9344.93	298.97	1113.57	276.788	262.995	309.22	9257.79	297.73	912.276	278.202	200.892
302.16	11338.1	289.69	9331.94	297.9	1101.41	285.14	1092.56	285.06	259.35	306.28	9228.26	296.87	1119.43	282.903	167.474	310.57	9310.73	299	1109.91	276.788	260.915	309.24	9227.51	297.76	909.732	278.237	200.412
302.2	11289.4	289.71	9299.97	297.94	1097.28	285.18	1088.26	285.1	258.481	306.31	9192.7	296.92	1115.97	282.925	167.184	310.59	9282.17	299.04	1106.58	276.788	260.955	309.28	9192.36	297.78	907.649	278.253	200
302.22	11249.5	289.74	9273.73	297.98	1093.92	285.22	1084.75	285.13	257.733	306.33	9162.95	296.95	1112.5	282.946	166.853	310.62	9248.19	299.05	1102.42	276.789	260.888	309.3	9163.54	297.81	905.046	278.289	199.517
302.26	11200.7	289.76	9243.04	298.02	1090.39	285.25	1080.79	285.17	256.867	306.37	9128.47	296.98	1108.97	282.97	166.566	310.65	9220.25	299.1	1099.02	276.789	260.855	309.33	9128.26	297.82	902.913	278.308	199.095
302.29	11162.5	289.79	9217.6	298.07	1087.08	285.29	1077.65	285.2	256.139	306.39	9099.34	297.03	1105.63	282.992	166.234	310.68	9187.19	299.13	1094.75	276.789	260.809	309.36	9098	297.85	900.597	278.343	198.61
302.32	11113.1	289.81	9187.97	298.09	1083.28	285.32	1073.54	285.25	255.289	306.42	9065	297.06	1101.82	283.015	165.945	310.7	9159.03	299.17	1091.39	276.789	260.793	309.39	9063.23	297.89	898.52	278.363	198.182
302.35	11078.1	289.84	9162.26	298.16	1075.7	285.36	1070.77	285.28	254.565	306.45	9036.41	297.09	1098.7	283.036	165.611	310.74	9126.11	299.2	1087.47	276.789	260.97	309.41	9034.33	297.93	896.328	278.395	197.691
302.39	11035	289.86	9132.15	298.16	1080.2	285.39	1067.45	285.32	253.736	306.48	9002.86	297.13	1094.95	283.061	165.323	310.76	9099.54	299.23	1084.19	276.79	260.825	309.45	9000.89	297.94	894.145	278.416	197.252
302.41	11000.1	289.88	9107.17	298.22	1072.56	285.42	1064.59	285.35	253.033	306.5	8975.06	297.17	1091.87	283.084	164.995	310.8	9067.25	299.26	1080.39	276.79	260.746	309.47	8972.37	297.97	891.403	278.45	196.753
302.45	10956	289.91	9078.31	298.23	1068.39	285.45	1061.2	285.39	252.22	306.53	8941.41	297.19	1087.49	283.107	164.715	310.81	9039.21	299.29	1077.35	276.791	263.14	309.5	8938.68	298	889.104	278.469	196.323
302.47	10921	289.93	9054.19	298.29	1065.16	285.49	1058.32	285.43	251.52	306.56	8913.55	297.24	1084.44	283.132	164.384	310.85	9005.93	299.33	1073.73	276.791	260.809	309.53	8911.38	298.03	886.707	278.505	195.835
302.51	10877.9	289.96	9026.07	298.31	1061.42	285.52	1054.85	285.46	250.717	306.59	8880.72	297.26	1079.97	283.15	164.103	310.87	8978.44	299.37	1070.9	276.791	260.816	309.56	8878.01	298.05	884.656	278.525	195.396
302.54	10843.7	289.98	9002.09	298.36	1058.35	285.55	1051.52	285.49	250.035	306.62	8853.21	297.3	1076.79	283.18	163.785	310.9	8945.9	299.41	1067.3	276.791	260.779	309.58	8850.4	298.1	881.777	278.562	194.897
302.57	10800.6	290	8973.29	298.38	1054.16	285.59	1047.33	285.54	249.231	306.64	8820.59	297.33	1072.82	283.2	163.502	310.93	8919.34	299.43	1064.19	276.791	260.958	309.62	8817.17	298.11	879.802	278.579	194.474
302.6	10766.7	290.03	8949.02	298.43	1050.84	285.62	1044.02	285.57	248.551	306.67	8793.35	297.37	1069.47	283.22	163.169	310.96	8887.8	299.46	1060.29	276.791	260.916	309.64	8789.68	298.15	877.018	278.617	193.993
302.63	10725.1	290.05	8920.05	298.46	1046.97	285.67	1039.95	285.61	247.752	306.7	8760.78	297.4	1065.61	283.24	162.888	310.99	8860.96	299.48	1057.14	276.791	260.889	309.67	8756.88	298.16	875.119	278.634	193.572
302.66	10691.8	290.08	8895.43	298.52	1044.22	285.69	1036.67	285.64	247.072	306.72	8733.9	297.43	1062.5	283.27	162.539	311.02	8829.7	299.52	1052.92	276.792	260.807	309.69	8730.55	298.2	872.623	278.67	193.078
302.69	10650.7	290.1	8866.26	298.53	1040.83	285.74	1032.88	285.68	246.279	306.75	8702.21	297.47	1058.88	283.29	162.25	311.04	8803.57	299.55	1049.67	276.792	260.735	309.73	8699.21	298.22	870.665	278.689	192.654
302.72	10617.9	290.12	8842.08	298.58	1037.94	285.78	1030.01	285.71	245.612	306.78	8675.92	297.48	1055.78	283.32	161.909	311.07	8771.77	299.58	1046.21	276.792	260.672	309.74	8672.71	298.25	868.148	278.724	192.168
302.75	10577.7	290.15	8813.99	298.6	1034.07	285.82	1026.73	285.75	244.83	306.81	8644.38	297.54	1051.93	283.34	161.632	311.09	8745.35	299.61	1042.92	276.792	260.705	309.78	8640.09	298.27	866.074	278.743	191.748
302.78	10545.6	290.17	8789.87	298.65	1031.21	285.84	1024.06	285.78	244.175	306.83	8618.42	297.55	1049.17	283.36	161.306	311.12	8713.25	299.63	1039.11	276.792	260.758	309.8	8612.84	298.29	863.594	278.778	191.256
302.81	10504.6	290.19	8761.58	298.68	1027.84	285.87	1021.12	285.83	243.423	306.86	8588.14	297.61	1045.76	283.38	161.035	311.14	8686.66	299.68	1036.05	276.792	260.838	309.83	8581.48	298.32	861.557	278.799	190.828
302.84	10472.8	290.22	8737.7	298.72	1025.14	285.91	1018.58	285.85	242.788	306.89	8562.59	297.62	1043.07	283.41	160.724	311.18	8655.54	299.71	1032.35	276.792	260.871	309.85	8556.69	298.33	859.26	278.833	190.334
302.87	10433.5	290.24	8710.2	298.75	1021.61	285.95	1015.15	285.9	242.025	306.91	8532.11	297.68	1036.96	283.43	160.45	311.2	8629.56	299.75	1029.59	276.792	260.947	309.89	8525.55	298.37	857.261	278.855	189.924
302.9	10401.9	290.26	8686.93	298.79	1018.58	285.97	1012.56	285.92	241.381	306.94	8506.94	297.68	1039.76	283.45	160.111	311.23	8598.4	299.78	1026.34	276.792	260.974	309.91	8500.11	298.38	854.933	278.889	189.449
302.93	10362.2	290.29	8659.68	298.83	1015.16	286	1009.03	285.97	240.624	306.97	8476.77	297.74	1033.38	283.47	159.837	311.25	8573.21	299.83	1023.42	276.792	260.947	309.94	8469.92	298.41	852.962	278.909	189.039
302.96	10331.3	290.31	8636.55	298.87	1012.16	286.02	1005.88	286	239.993	307	8451.78	297.76	1030.56	283.5	159.522	311.28	8543.16	299.85	1019.48	276.792	260.909	309.96	8444.39	298.43	850.527	278.943	188.576
302.99	10292.7	290.34	8610.11	298.89	1008.44	286.06	1002.18	286.03	239.28	307.02	8422.21	297.8	1027.11	283.52	159.251	311.31	8517.8	299.88	1016.83	276.792	260.99	309.99	8414.56	298.47	848.536	278.963	188.177
303.02	10262.2	290.35	8587.49	298.92	1005.51	286.09	999.288	286.07	238.655	307.04	8397.34	297.83	1024.19	283.55	158.947	311.34	8487.86	299.91	1013.47	276.793	260.764	310.01	8389.82	298.49	846.206	278.994	187.725
303.05	10224	290.38	8561.01	298.95	1001.87	286.12	995.656	286.11	237.949	307.07	8368.34	297.87	1020.34	283.57	158.678	311.36	8463.22	299.94	1010.8	276.793	260.669	310.04	8361.14	298.53	844.698	279.014	187.335
303.07	10196.4	290.4	8538.8	298.98	998.974	286.15	992.66	286.14	237.346	307.1	8343.93	297.9	1017.42	283.59	158.359	311.39	8433.76	299.96	1007.61	276.793	260.779	310.06	8336.86	298.55	842.347	279.044	186.898
303.1	10161.5	290.43	8512.84	299.02	995.779	286.17	989.301	286.17	236.631	307.13	8315.4	297.93	1013.84	283.61	158.092	311.42	8409.48	299.99	1004.97	276.793	260.671	310.09	8306.43	298.59	840.364	279.068	186.516
303.13	10133.3	290.45	8490.22	299.04	993.05	286.22	986.37	286.21	236.016	307.15	8291.93	297.97	1011.09	283.64	157.785	311.44	8380.64	300.03	1001.96	276.793	260.63	310.11	8280.57	298.59	837.78	279.096	186.091
303.16	10097.8	290.47	8464.44	299.1	989.302	286.25	982.885	286.24	235.288	307.18	8263.36	298	1007.45	283.66	157.732	311.47	8355.83	300.05	999.441	276.793	260.769	310.14	8251.93	298.65	835.757	279.123	185.704
303.19	10068.6	290.49	8443.46	299.11	986.818	286.28	980.161	286.27	234.669	307.2	8239.74	298.03	1004.77	283.68	157.359	311.5	8326.22	300.08	996.208	276.793	260.829	310.17	8227.93	298.65	833.317	279.149	185.252
303.22	10031	290.52	8419.19	299.16	984	286.31	976.74	286.31	233.957	307.23	8211.5	298.07	1001.85	283.71	157.078	311.52	8302.15	300.12	993.374	276.793	260.898	310.2	8199.12	298.69	831.584	279.177	184.847
303.25	10001	290.54	8398.07	299.19	981.553	286.34	973.871	286.34	233.361	307.25	8188.43	298.09	999.099	283.73	156.749	311.55	8274.54	300.15	990.168	276.794	260.734	310.22	8174.61	298.7	829.453	279.201	184.385
303.28	9963.43	290.56	8373.14	299.22	978.399	286.38	970.429	286.37	232.68	307.28	8161.09	298.13	995.847	283.75	156.47	311.57	8251.39	300.18	987.827	276.794	260.616	310.25	8147.03	298.74	827.148	279.23	183.982
303.3	9935.53	290.58	8352.19	299.26	975.864	286.41	968.102	286.41	232.088	307.31	8138.59	298.16	993.184	283.77	156.142	311.6	8224.21	300.22	984.676	276.794	260.74	310.27	8123.85	298.74	824.793	279.256	183.514
303.33	9902.44	290.6	8328.03	299.27	972.566	286.46	965.422	286.44	231.409	307.33	8111.58	298.19	989.939	283.79	155.851	311.62	8201.45	300.25	982.009	276.794	260.755	310.3	8095.96	298.78	823.019	279.282	183.109
303.36	9874.88	290.62	8307.57	299.32	967.244	286.47	963.093	286.47	230.831	307.35	8088.73	298.23	987.275	283.82	155.522	311.64	8174.48	300.27	978.933	276.794	260.712	310.32	8073.38	298.8	820.954	279.31	182.646
303.39	9839.71	290.65	8283.78	299.33	970.048	286.51	960.335	286.51	230.168	307.38	8062.19	298.26	984.304	283.84	155.249	311.67	8151.98	300.31	976.494	276.794	260.865	310.35	8045.69	298.83	819.364	279.337	182.249
303.41	9813.06	290.67	8263.33	299.39	961.26	286.53	958.062	286.54	229.602	307.41	8040.1	298.3	981.704	283.86	154.926	311.7	8124.78	300.34	973.729	276.794	260.846	310.37	8022.81	298.85	817.405	279.362	181.803
303.45	9780.49	290.69	8238.95	299.39	964.543	286.57	954.957	286.57	228.952	307.43	8013.16	298.33	978.418	283.88	154.649	311.72	8102.04	300.37	971.488	276.794	260.881	310.4	7996.03	298.89	815.533	279.389	181.425
303.47	9753.55	290.71	8218.38	299.44	958.673	286.6	952.721	286.61	228.386	307.46	7991.08	298.36	976.036	283.91	154.321	311.75	8074.84	300.4	968.914	276.795	262.956	310.42	7974.1	298.9	813.388	279.418	180.996
303.5	9718.62	290.74	8194.14	299.47	955.788	286.64	949.901	286.64	227.738	307.48	7965.22	298.38	973.119	283.93	154.043	311.77	8052.67	300.44	966.214	276.795	260.659	310.45	7948.06	298.93	811.651	279.441	180.627
303.53	9691.57	290.76	8173.95	299.5	953.495	286.66	947.11	286.67	227.191	307.51	7943.24	298.42	970.878	283.95	153.727	311.8	8025.41	300.47	963.159	276.795	260.77	310.47	7926.15	298.96	809.953	279.47	180.192
303.56	9657.42	290.78	8150.31	299.53	950.504	286.69	943.734	286.71	226.538	307.53	7916.98	298.44	967.893	283.98	153.456	311.82	8002.31	300.5	960.659	276.795	260.798	310.5	7899.66	298.98	808.205	279.493	179.812
303.58	9631.67	290.8	8129.98	299.56	948.028	286.72	941.161	286.74	225.978	307.56	7894.62	298.46	965.46	284	153.14	311.85	7975.32	300.54	957.679	276.795	260.865	310.52	7877.6	299.01	806.273	279.523	179.372
303.62	9599.5	290.82	8106.18	299.6	944.883	286.75	938.051	286.77	225.329	307.58	7869.37	298.5	962.549	284.02	152.873	311.87	7953.87	300.56	955.349	276.795	260.868	310.55	7852.18	299.02	804.359	279.544	178.986
303.64	9572.93	290.84	8085.79	299.62	942.73	286.78	935.773	286.8	224.778	307.61	7848.1	298.52	960.134	284.04	152.558	311.9	7928.93	300.61	950.084	276.795	260.84	310.57	7830.54	299.05	802.309	279.573	178.545
303.67	9538.87	290.87	8061.9	299.66	939.659	286.81	933.188	286.83	224.131	307.63	7822.26	298.57	957.001	284.07	152.298	311.92	7907.96	300.61	952.444	276.796	260.699	310.6	7805.27	299.06	800.658	279.595	178.176
303.69	9512.59	290.89	8041.02	299.69	937.247	286.83	930.678	286.87	223.582	307.65	7801.07	298.59	954.479	284.09	151.988	311.95	7883.06	300.66	944.605	276.796	260.701	310.62	7784.69	299.1	798.597	279.623	177.749
303.73	9481.78	290.91	8017.19	299.72	934.413	286.86	927.775	286.9	222.956	307.68	7775.99	298.62	951.383	284.11	151.738	311.97	7862.65	300.66	946.881	276.796	260.634	310.64	7760.01	299.12	796.76	279.648	177.379
303.75	9455.22	290.93	7996.77	299.76	931.846	286.88	925.456	286.93	222.423	307.7	7754.9	298.66	948.649	284.13	151.44	312	7838.09	300.71	942.013	276.796	260.62	310.66	7739.16	299.15	794.446	279.675	176.958
303.78	9421.31	290.95	7973.7	299.8	928.55	286.92	922.8	286.96	221.807	307.73	7730.62	298.68	945.637	284.16	151.183	312.02	7817.71	300.72	939.831	276.796	260.769	310.69	7714.83	299.17	792.745	279.701	176.598
303.8	9395.83	290.97	7954.09	299.83	926.078	286.94	920.508	286.99	221.289	307.76	7710.03	298.74	940.281	284.18	150.888	312.04	7792.38	300.76	937.017	276.796	260.721	310.71	7694.51	299.2	790.556	279.731	176.187
303.83	9364.06	291	7930.99	299.86	923.202	286.99	917.871	287.02	220.672	307.78	7685.57	298.74	943.17	284.2	150.631	312.07	7771.59	300.77	934.825	276.796	260.731	310.74	7670.28	299.23	789.029	279.752	175.834
303.85	9337.44	291.02	7911.56	299.89	920.719	287.01	915.665	287.06	220.151	307.8	7665.14	298.78	937.754	284.22	150.331	312.09	7748.02	300.8	932.211	276.796	260.833	310.76	7650.7	299.25	786.927	279.782	175.431
303.88	9305.06	291.04	7889.59	299.93	918.005	287.04	912.507	287.09	219.55	307.83	7641.18	298.79	935.035	284.24	150.072	312.11	7728.3	300.83	929.921	276.797	263.038	310.78	7626.83	299.29	785.107	279.804	175.069
303.9	9279.31	291.06	7870.87	299.95	915.808	287.07	910.404	287.12	219.027	307.85	7620.61	298.84	932.642	284.27	149.772	312.14	7705.01	300.86	927.21	276.797	260.708	310.8	7606.45	299.3	783.15	279.83	174.661
303.93	9247.49	291.08	7849.04	299.98	913.208	287.11	907.591	287.15	218.413	307.87	7595.95	298.87	929.806	284.29	149.522	312.16	7685.3	300.88	925.044	276.797	260.666	310.83	7582.53	299.32	781.612	279.853	174.314
303.96	9220.93	291.1	7830.98	300.01	911.068	287.13	905.525	287.18	217.891	307.9	7575.99	298.9	927.631	284.31	149.228	312.19	7661.23	300.92	922.34	276.797	260.73	310.85	7561.54	299.33	779.557	279.878	173.935
303.99	9188.65	291.12	7809.84	300.03	908.83	287.16	902.663	287.21	217.308	307.92	7552.66	298.92	925.101	284.33	148.984	312.21	7641.71	300.95	919.971	276.799	260.706	310.88	7537.69	299.37	778.047	279.902	173.592
304.01	9163.42	291.15	7791.83	300.06	906.986	287.19	900.26	287.24	216.8	307.94	7532.53	298.95	922.954	284.36	148.718	312.24	7618.45	300.99	917.093	276.8	262.951	310.9	7517.81	299.38	776.323	279.929	173.189
304.04	9131.87	291.17	7770.52	300.1	904.373	287.23	897.26	287.27	216.211	307.97	7509.15	298.98	920.019	284.37	148.48	312.26	7598.8	301	914.58	276.803	262.969	310.93	7494.68	299.42	774.706	279.953	172.842
304.06	9107.93	291.19	7752.39	300.13	902.144	287.24	894.683	287.31	215.7	307.99	7489.38	299.01	917.986	284.4	148.197	312.28	7575.03	301.04	911.403	276.805	262.878	310.94	7475.32	299.43	772.795	279.981	172.448
304.09	9078.08	291.21	7730.8	300.17	899.26	287.28	892.288	287.34	215.08	308.02	7465.58	299.04	915.002	284.42	147.955	312.3	7556.18	301.06	909.156	276.809	262.955	310.97	7452.53	299.46	771.333	280.005	172.109
304.11	9054.85	291.23	7712.62	300.19	897.078	287.3	889.979	287.37	214.557	308.04	7446.61	299.07	912.747	284.44	147.667	312.33	7534.27	301.1	906.352	276.81	262.767	310.99	7433.39	299.47	769.354	280.033	171.714
304.15	9025.25	291.25	7691.54	300.24	894.077	287.34	887.361	287.4	213.937	308.06	7423.7	299.09	910.155	284.46	147.433	312.35	7515.01	301.11	904.248	276.813	262.935	311.02	7410.6	299.5	767.784	280.057	171.37
304.17	9001.46	291.27	7673.78	300.26	891.865	287.36	885.225	287.43	213.42	308.09	7405.17	299.13	908.071	284.48	147.164	312.38	7492.32	301.15	901.596	276.818	262.611	311.03	7391.49	299.53	766.048	280.083	170.972
304.2	8972.83	291.29	7652.46	300.3	889.238	287.39	882.615	287.47	212.831	308.11	7382.67	299.15	905.238	284.5	146.926	312.39	7474.1	301.17	899.472	276.818	262.824	311.07	7369.45	299.55	764.332	280.106	170.621
304.22	8949.31	291.31	7634.69	300.32	886.948	287.43	880.592	287.5	212.336	308.13	7363.78	299.2	902.98	284.53	146.641	312.42	7452.21	301.2	896.828	276.823	262.696	311.08	7351.31	299.57	762.126	280.132	170.204
304.25	8920.01	291.33	7613.88	300.37	882.143	287.45	877.866	287.53	211.761	308.16	7341.27	299.22	900.356	284.54	146.407	312.44	7434.17	301.23	895.165	276.828	262.496	311.12	7309.26	299.59	760.682	280.154	169.858
304.27	8897.69	291.35	7595.59	300.37	884.108	287.5	875.601	287.56	211.271	308.18	7322.45	299.26	898.347	284.57	146.133	312.47	7412.23	301.26	892.808	276.832	262.549	311.12	7327.99	299.62	758.652	280.181	169.466
304.3	8869.53	291.38	7573.36	300.42	879.6	287.53	872.661	287.59	210.7	308.2	7300.2	299.29	895.857	284.58	145.899	312.48	7393.64	301.29	890.826	276.834	262.431	311.16	7288.21	299.65	757.051	280.206	169.138
304.32	8847.18	291.4	7555.64	300.43	877.355	287.56	870.472	287.62	210.209	308.23	7281.55	299.31	893.779	284.61	145.624	312.51	7371.42	301.32	888.353	276.839	262.464	311.17	7271.1	299.68	755.635	280.232	168.746
304.35	8819.69	291.42	7535.44	300.48	874.579	287.58	868.003	287.66	209.631	308.25	7259.54	299.34	891.163	284.63	145.39	312.53	7353.19	301.35	886.255	276.843	262.339	311.2	7249.99	299.71	754.005	280.255	168.409
304.37	8797.04	291.44	7518.25	300.49	872.545	287.62	865.668	287.69	209.147	308.27	7241.04	299.35	888.959	284.66	145.114	312.56	7330.66	301.39	883.732	276.846	262.398	311.21	7231.6	299.73	751.963	280.279	168.029
304.4	8768.26	291.47	7497.65	300.54	869.729	287.64	863.314	287.72	208.584	308.3	7219.04	299.4	884.232	284.67	144.887	312.58	7312.23	301.41	881.864	276.851	262.203	311.25	7209.93	299.77	750.566	280.302	167.708
304.42	8745.49	291.48	7480.03	300.55	867.685	287.66	860.949	287.75	208.112	308.32	7200.99	299.4	886.399	284.7	144.621	312.61	7289.56	301.44	879.899	276.853	262.283	311.26	7191.96	299.78	748.944	280.33	167.34
304.45	8717.07	291.51	7459.64	300.58	865.399	287.69	858.159	287.78	207.565	308.34	7179.48	299.44	881.536	284.71	144.391	312.63	7271.06	301.46	878.03	276.861	262.022	311.3	7152.41	299.81	747.557	280.352	167.026
304.47	8694.34	291.52	7442.16	300.61	863.314	287.71	855.928	287.81	207.085	308.36	7161.22	299.45	879.215	284.74	144.127	312.65	7249.01	301.49	875.939	276.863	262.118	311.3	7170.31	299.82	746.081	280.38	166.661
304.5	8665.33	291.54	7421.93	300.63	861.104	287.73	853.251	287.84	206.511	308.39	7139.68	299.49	876.536	284.75	143.901	312.67	7231.2	301.52	874.214	276.873	261.938	311.34	7131.12	299.86	744.741	280.401	166.332
304.52	8642.26	291.56	7404.67	300.67	859.318	287.76	850.961	287.87	206.037	308.41	7121.52	299.52	874.628	284.78	143.642	312.69	7209.39	301.54	872.199	276.874	261.852	311.35	7113.21	299.86	742.649	280.427	165.951
304.55	8614.31	291.59	7384.59	300.69	857.29	287.78	847.955	287.9	205.47	308.43	7100.35	299.55	872.227	284.79	143.421	312.71	7191.67	301.57	870.502	276.882	261.726	311.38	7092.6	299.89	741.427	280.447	165.627
304.57	8592.25	291.6	7367.91	300.71	855.301	287.81	845.761	287.94	204.997	308.45	7083.25	299.58	870.366	284.82	143.156	312.74	7170.15	301.6	868.409	276.884	261.784	311.39	7075.19	299.91	739.637	280.473	165.266
304.6	8565.39	291.63	7348.69	300.76	852.933	287.85	842.734	287.97	204.453	308.48	7063.06	299.6	868.071	284.83	142.937	312.75	7152.36	301.63	866.691	276.891	261.614	311.43	7053.94	299.93	738.121	280.494	164.956
304.62	8543.6	291.64	7332.41	300.77	850.885	287.87	840.616	288	203.987	308.5	7045.78	299.62	866.277	284.86	142.677	312.78	7130.67	301.65	864.289	276.892	261.681	311.44	7036.5	299.96	736.516	280.522	164.602
304.65	8515.68	291.66	7313.29	300.82	848.207	287.91	838.129	288.03	203.447	308.52	7025.19	299.65	864.058	284.88	142.454	312.8	7112.74	301.68	862.253	276.901	261.542	311.47	7015.54	299.97	734.833	280.546	164.295
304.67	8494.59	291.68	7297.03	300.83	846.138	287.93	836.27	288.06	202.992	308.54	7007.58	299.67	862.175	284.9	142.202	312.83	7091.45	301.71	859.994	276.903	261.435	311.48	6998.13	299.99	732.875	280.572	163.933
304.7	8468.58	291.7	7277.74	300.87	843.256	287.98	834.654	288.09	202.454	308.57	6987.35	299.7	860.071	284.92	141.981	312.84	7073.98	301.72	858.082	276.911	261.334	311.52	6978.33	300.02	731.29	280.593	163.624
304.72	8447.63	291.72	7261.5	300.89	841.031	287.99	832.805	288.12	202.003	308.58	6970.5	299.72	858.014	284.94	141.722	312.87	7052.85	301.75	855.6	276.914	261.213	311.53	6961.46	300.04	729.292	280.619	163.266
304.75	8420.07	291.74	7242.18	300.93	838.709	288.03	830.5	288.15	201.462	308.61	6950.85	299.75	855.687	284.96	141.495	312.89	7035.15	301.77	853.687	276.924	261.108	311.56	6941.22	300.06	727.726	280.64	162.95
304.77	8400.48	291.75	7226.04	300.95	836.929	288.05	828.465	288.18	200.998	308.63	6935.32	299.77	853.658	284.98	141.238	312.91	7014.21	301.79	851.407	276.927	260.992	311.57	6924.19	300.08	726.139	280.667	162.59
304.8	8376.82	291.78	7206.9	300.98	834.935	288.08	826.023	288.21	200.462	308.65	6915.18	299.81	851.32	285	141.02	312.93	6997.29	301.82	849.416	276.937	260.884	311.6	6903.89	300.11	724.66	280.687	162.281
304.82	8356.37	291.79	7191.09	301	832.979	288.1	824.259	288.25	200.01	308.67	6898.44	299.84	849.28	285.02	140.761	312.95	6977.95	301.86	846.97	276.942	260.782	311.61	6887.12	300.12	722.661	280.713	161.948
304.85	8330.09	291.82	7173.27	301.03	830.848	288.13	822.02	288.27	199.506	308.7	6878.94	299.87	847.028	285.04	140.547	312.98	6961.9	301.87	845.036	276.948	260.703	311.64	6867.42	300.15	721.377	280.735	161.639
304.87	8310.5	291.84	7158.46	301.07	828.979	288.14	820.236	288.3	199.077	308.71	6862.52	299.89	845.143	285.06	140.288	313	6941.61	301.91	842.531	276.954	260.627	311.66	6850.65	300.17	719.799	280.762	161.299
304.89	8284.9	291.86	7139.88	301.09	826.992	288.17	817.25	288.33	198.566	308.74	6843.55	299.92	842.802	285.08	140.069	313.02	6925.2	301.93	840.635	276.961	260.555	311.69	6830.46	300.2	718.495	280.783	161.009
304.91	8265.34	291.87	7124.24	301.12	825.2	288.2	815.164	288.36	198.136	308.76	6827.98	299.95	841.167	285.1	139.816	313.04	6905.67	301.97	836.784	276.967	260.438	311.7	6814.52	300.22	716.937	280.811	160.669
304.94	8240.63	291.9	7105.42	301.15	822.874	288.22	812.689	288.39	197.639	308.78	6809.1	299.97	839.136	285.13	139.599	313.06	6889.67	301.97	838.632	276.975	260.334	311.73	6795.27	300.26	715.681	280.833	160.37
304.96	8221.42	291.91	7089.51	301.18	821.09	288.26	810.981	288.42	197.216	308.8	6793.27	300.01	837.587	285.14	139.349	313.08	6871.48	302.03	832.95	276.981	260.187	311.74	6779.77	300.27	714.005	280.859	160.004
304.99	8197.12	291.94	7071.15	301.19	818.598	288.28	808.797	288.45	196.727	308.82	6774.34	300.03	835.467	285.17	139.133	313.1	6856.56	302.03	834.751	276.991	260.048	311.77	6761.15	300.3	712.71	280.878	159.689
305.01	8178	291.95	7055.44	301.24	816.823	288.3	807.137	288.48	196.315	308.84	6758.7	300.06	833.812	285.18	138.865	313.12	6838.23	302.08	830.858	276.998	259.883	311.78	6745.33	300.31	711.12	280.903	159.347
305.03	8154.27	291.98	7038.5	301.26	814.456	288.33	805.302	288.5	195.839	308.87	6740.08	300.09	831.429	285.21	138.648	313.15	6823.35	302.09	828.979	277.008	259.745	311.81	6726.45	300.35	705.423	280.924	159.059
305.06	8135.06	291.99	7022.92	301.28	812.932	288.36	803.466	288.54	195.447	308.89	6724.59	300.12	829.88	285.22	138.402	313.16	6805.07	302.12	826.682	277.015	259.597	311.83	6711.06	300.35	704.452	280.95	158.723
305.08	8110.86	292.02	7004.4	301.31	810.642	288.39	801.338	288.56	194.973	308.91	6706.25	300.15	827.923	285.25	138.189	313.19	6789.83	302.13	824.734	277.024	259.474	311.86	6692.25	300.38	703.431	280.971	158.432
305.1	8091.95	292.03	6989.25	301.35	809.079	288.41	800.095	288.59	194.577	308.93	6690.66	300.17	826.111	285.26	137.944	313.21	6770.74	302.17	822.35	277.034	259.361	311.87	6676.44	300.39	702.332	280.998	158.11
305.13	8067.78	292.06	6971.18	301.37	806.807	288.45	798.189	288.62	194.118	308.95	6672.74	300.19	823.639	285.29	137.729	313.23	6755.67	302.18	820.537	277.043	259.262	311.9	6657.92	300.42	701.34	281.02	157.825
305.15	8049.6	292.07	6955.51	301.4	804.932	288.46	796.459	288.65	193.721	308.97	6657.01	300.22	821.701	285.3	137.478	313.25	6737.57	302.22	818.074	277.051	259.128	311.91	6642.71	300.43	700.261	281.045	157.492
305.17	8025.76	292.09	6937.59	301.43	803.32	288.5	794.407	288.67	193.254	308.99	6638.54	300.25	819.587	285.33	137.261	313.28	6721.85	302.23	816.192	277.06	259.008	311.93	6624.22	300.47	699.416	281.066	157.204
305.19	8007.66	292.11	6922.19	301.45	801.668	288.51	792.579	288.71	192.87	309.01	6623.02	300.26	817.851	285.35	137.015	313.29	6702.89	302.25	813.815	277.07	258.86	311.96	6608.26	300.49	698.494	281.089	156.869
305.22	7985.27	292.13	6905.02	301.48	799.628	288.54	790.361	288.73	192.421	309.04	6605.06	300.29	816.028	285.37	136.803	313.32	6687.52	302.27	812.166	277.077	258.711	311.98	6590.09	300.52	702.001	281.112	156.583
305.24	7966.9	292.14	6890.63	301.51	797.713	288.56	788.746	288.76	192.038	309.05	6590.44	300.3	814.203	285.39	136.546	313.33	6669.62	302.31	810.273	277.087	258.524	312	6574.97	300.53	700.322	281.137	156.251
305.26	7943.86	292.17	6873.92	301.54	795.428	288.58	786.849	288.78	191.596	309.08	6573.09	300.33	811.797	285.42	136.328	313.36	6654.65	302.34	808.661	277.096	258.369	312.02	6556.86	300.56	699.015	281.159	155.965
305.28	7925.99	292.18	6859.31	301.56	793.629	288.62	784.932	288.82	191.222	309.1	6558.37	300.35	809.962	285.43	136.071	313.37	6636.56	302.37	806.671	277.107	258.182	312.04	6541.4	300.57	697.522	281.18	155.653
305.31	7903.72	292.21	6841.59	301.58	791.421	288.63	782.712	288.84	190.775	309.12	6540.37	300.39	807.991	285.46	135.856	313.4	6621.45	302.38	805.059	277.118	258.027	312.06	6523.42	300.59	696.215	281.205	155.381
305.33	7885.65	292.22	6826.89	301.61	789.875	288.66	781.203	288.87	190.402	309.14	6525.32	300.4	806.418	285.47	135.616	313.42	6603.15	302.43	801.377	277.128	257.871	312.08	6509.09	300.62	694.633	281.229	155.059
305.35	7863.1	292.24	6809.78	301.64	787.676	288.69	779.45	288.89	189.963	309.16	6507.99	300.43	804.175	285.5	135.404	313.45	6588.28	302.43	802.99	277.138	257.741	312.1	6491.49	300.62	693.365	281.255	154.777
305.37	7845.8	292.26	6794.91	301.67	786.081	288.73	777.706	288.92	189.593	309.18	6493.92	300.47	802.669	285.51	135.153	313.46	6571.28	302.49	799.482	277.15	257.584	312.12	6476.26	300.64	691.871	281.273	154.455
305.4	7824.97	292.28	6778.19	301.68	784.923	288.75	775.221	288.95	189.155	309.2	6476.8	300.48	800.687	285.54	134.945	313.49	6556.94	302.5	797.723	277.159	257.443	312.14	6459.34	300.66	690.406	281.299	154.177
305.42	7807.64	292.3	6764.23	301.71	783.56	288.79	773.058	288.98	188.796	309.22	6462.44	300.51	799.006	285.55	134.707	313.5	6539.71	302.54	795.574	277.168	257.251	312.16	6444.92	300.69	688.783	281.316	153.855
305.44	7786.14	292.32	6748.27	301.73	781.875	288.81	770.143	289	188.379	309.24	6446.17	300.54	797.266	285.58	134.507	313.53	6525.25	302.55	793.97	277.18	257.069	312.18	6428.12	300.71	687.888	281.343	153.586
305.46	7769.14	292.33	6734.56	301.76	780.395	288.83	767.939	289.03	188.024	309.26	6432.41	300.56	795.788	285.59	134.263	313.54	6508.77	302.58	791.772	277.191	256.842	312.2	6413.9	300.74	686.472	281.362	153.275
305.48	7747.71	292.35	6718.7	301.78	778.368	288.86	765.559	289.05	187.608	309.28	6415.56	300.59	793.727	285.62	134.05	313.57	6494.49	302.61	789.963	277.202	256.634	312.22	6396.26	300.76	685.301	281.389	153.002
305.5	7730.35	292.37	6704.98	301.8	776.741	288.89	763.511	289.08	187.246	309.29	6401.05	300.62	792.083	285.63	133.815	313.58	6479.1	302.62	787.725	277.219	256.379	312.24	6382.1	300.79	683.796	281.409	152.683
305.53	7708.46	292.39	6688.94	301.83	774.374	288.9	761.092	289.1	186.814	309.32	6383.93	300.63	790.04	285.66	133.607	313.61	6465.33	302.65	786.139	277.229	256.151	312.26	6365.59	300.81	682.438	281.433	152.414
305.55	7691.85	292.41	6675.69	301.85	772.833	288.93	759.482	289.14	186.452	309.33	6369.77	300.66	788.338	285.67	133.37	313.62	6448.58	302.66	784.211	277.246	255.905	312.28	6352.45	300.83	680.735	281.453	152.107
305.57	7672.91	292.43	6660.35	301.89	770.115	288.93	757.793	289.16	186.024	309.36	6352.94	300.67	786.567	285.7	133.167	313.65	6434.76	302.68	782.663	277.256	255.685	312.3	6335.68	300.85	679.692	281.478	151.837
305.59	7656.35	292.44	6646.64	301.9	768.467	288.96	756.602	289.19	185.662	309.37	6339.29	300.72	783.375	285.71	132.932	313.66	6418.54	302.69	780.882	277.275	255.452	312.32	6321.2	300.86	678.156	281.498	151.53
305.62	7635.91	292.47	6630.16	301.95	766.634	288.98	755.255	289.21	185.253	309.4	6323.07	300.72	785.175	285.74	132.722	313.69	6405.88	302.73	779.314	277.283	255.249	312.34	6303.6	300.89	676.748	281.525	151.264
305.64	7619.53	292.48	6617.23	301.96	765.249	289.01	754.063	289.24	184.899	309.41	6309.31	300.76	780.229	285.76	132.481	313.7	6390.86	302.75	777.57	277.305	255.004	312.36	6289.26	300.9	675.311	281.545	150.955
305.66	7600.02	292.51	6601.8	302	763.629	289.03	752.383	289.26	184.498	309.44	6293.27	300.76	781.865	285.78	132.275	313.73	6377.82	302.78	776.031	277.312	254.78	312.37	6272.24	300.92	674.207	281.571	150.693
305.68	7582.88	292.52	6588.56	302.02	762.146	289.06	751.113	289.29	184.163	309.45	6279.06	300.81	778.817	285.8	132.04	313.74	6362.32	302.8	774.53	277.334	254.487	312.4	6258.56	300.94	672.858	281.588	150.383
305.7	7559.98	292.54	6572.79	302.05	760.302	289.08	749.296	289.32	183.764	309.47	6263.24	300.82	777.122	285.82	131.854	313.77	6348.72	302.83	773.078	277.342	254.237	312.42	6242.36	300.96	671.725	281.614	150.123
305.72	7543.76	292.55	6559.61	302.08	758.798	289.1	747.918	289.34	183.411	309.49	6250.06	300.86	775.534	285.84	131.613	313.78	6332.05	302.85	771.294	277.365	253.923	312.44	6228.48	300.97	670.355	281.631	149.803
305.74	7523.49	292.58	6543.59	302.1	756.924	289.14	745.915	289.37	183	309.51	6234.16	300.89	773.448	285.86	131.41	313.81	6318.45	302.88	769.91	277.376	253.632	312.46	6212.42	300.99	669.242	281.658	149.542
305.77	7507.4	292.59	6529.99	302.13	755.635	289.16	744.37	289.4	182.643	309.53	6220.9	300.9	771.86	285.88	131.192	313.82	6302.28	302.9	768.223	277.403	253.29	312.48	6199.29	301.03	668.286	281.676	149.248
305.79	7487.73	292.61	6514.84	302.15	753.702	289.19	742.669	289.42	182.233	309.55	6205.07	300.94	768.721	285.9	131.001	313.84	6288.91	302.91	766.809	277.412	252.977	312.5	6183.68	301.05	666.936	281.703	148.987
305.81	7471.57	292.62	6501.68	302.17	752.022	289.21	741.29	289.45	181.886	309.57	6191.62	300.94	769.871	285.92	130.781	313.86	6273.15	302.94	765.141	277.44	252.615	312.52	6170.25	301.07	665.408	281.722	148.691
305.83	7451.21	292.65	6486.37	302.2	750.029	289.25	740.068	289.47	181.482	309.59	6176.11	300.97	766.829	285.94	130.581	313.88	6259.76	302.95	763.766	277.447	252.299	312.54	6154.2	301.08	664.205	281.747	148.433
305.85	7436.02	292.66	6473.58	302.23	748.377	289.27	738.581	289.5	181.138	309.61	6163.12	300.99	765.258	285.96	130.356	313.9	6243.08	302.98	761.892	277.48	251.944	312.56	6141.01	301.11	662.696	281.765	148.147
305.88	7417.39	292.68	6458.26	302.25	746.892	289.3	736.79	289.53	180.732	309.63	6147.68	301.02	763.493	285.98	130.171	313.92	6229.1	303	760.331	277.486	251.627	312.58	6125.39	301.12	661.591	281.791	147.898
305.89	7401.84	292.69	6445.56	302.26	745.514	289.32	735.078	289.55	180.385	309.65	6134.54	301.05	762.029	286	129.946	313.94	6212.74	303.04	758.945	277.517	251.247	312.6	6112.27	301.16	660.201	281.81	147.604
305.92	7381.8	292.72	6429.4	302.28	743.901	289.34	733.296	289.58	179.976	309.67	6119.54	301.06	760.292	286.02	129.749	313.96	6199.23	303.06	757.412	277.527	250.886	312.62	6097.37	301.18	658.899	281.836	147.345
305.93	7366.2	292.73	6416.96	302.32	742.346	289.37	731.789	289.6	179.621	309.68	6106.9	301.11	756.983	286.04	129.518	313.98	6183.38	303.1	755.518	277.559	250.468	312.64	6084.9	301.2	657.33	281.853	147.051
305.96	7346.9	292.75	6403.19	302.35	740.674	289.4	730.046	289.63	179.224	309.7	6092.01	301.11	758.876	286.06	129.327	313.99	6170.15	303.12	754.073	277.573	250.083	312.65	6069.64	301.21	656.402	281.878	146.793
305.98	7331.34	292.76	6391.04	302.38	739.471	289.41	728.675	289.65	178.888	309.72	6079.19	301.15	754.942	286.08	129.1	314.01	6154.35	303.15	752.335	277.602	249.604	312.68	6057.04	301.24	655.051	281.894	146.504
306.01	7312.4	292.78	6376.31	302.4	737.945	289.44	726.785	289.68	178.503	309.74	6063.78	301.16	752.979	286.1	128.909	314.03	6141.3	303.16	750.84	277.619	249.175	312.69	6041.87	301.25	653.827	281.92	146.263
306.02	7296.58	292.8	6363.99	302.42	736.712	289.46	725.326	289.7	178.177	309.76	6051.13	301.2	751.348	286.12	128.686	314.05	6125.93	303.18	749.071	277.649	248.68	312.71	6029.28	301.28	652.415	281.938	145.985
306.05	7278.67	292.82	6349.61	302.44	734.647	289.47	723.7	289.73	177.811	309.78	6036.16	301.22	749.442	286.14	128.5	314.07	6113.5	303.2	747.781	277.668	248.242	312.73	6014.46	301.29	651.368	281.965	145.738
306.06	7262.67	292.83	6337.37	302.48	733.14	289.49	722.524	289.76	177.483	309.8	6023.85	301.25	748.104	286.16	128.281	314.09	6098.81	303.22	745.817	277.7	247.724	312.75	6002.25	301.32	650.114	281.982	145.461
306.09	7242.59	292.85	6322.69	302.51	731.319	289.51	720.867	289.78	177.098	309.82	6008.95	301.26	746.355	286.18	128.093	314.1	6086.34	303.23	744.448	277.719	247.263	312.77	5987.52	301.34	649.147	282.008	145.22
306.1	7227.83	292.87	6310.52	302.53	729.919	289.54	719.407	289.81	176.768	309.84	5996.31	301.28	744.859	286.19	127.882	314.13	6070.82	303.26	742.855	277.752	246.725	312.78	5975.74	301.36	647.715	282.024	144.943
306.13	7210.14	292.89	6296.49	302.55	727.961	289.56	717.534	289.83	176.376	309.86	5981.45	301.31	743.04	286.21	127.702	314.14	6058.3	303.28	741.525	277.773	246.226	312.8	5960.86	301.37	646.579	282.05	144.702
306.14	7196.13	292.9	6284.54	302.57	726.511	289.59	716.122	289.86	176.043	309.88	5969.18	301.33	741.652	286.23	127.496	314.16	6044.93	303.31	739.833	277.805	245.654	312.82	5948.53	301.4	645.482	282.069	144.43
306.17	7178.31	292.92	6270.56	302.59	724.542	289.6	714.917	289.89	175.676	309.89	5955.17	301.36	739.96	286.25	127.312	314.18	6033.02	303.33	738.933	277.825	245.13	312.84	5933.54	301.42	644.603	282.093	144.192
306.18	7164.25	292.94	6258.86	302.62	723.18	289.63	713.612	289.91	175.357	309.91	5943.51	301.37	738.717	286.27	127.093	314.2	6018.73	303.37	737.378	277.86	244.506	312.86	5920.98	301.44	643.457	282.112	143.919
306.21	7147.1	292.96	6245.66	302.64	721.495	289.66	711.856	289.94	174.986	309.93	5929.62	301.41	735.597	286.29	126.909	314.22	6006.89	303.39	735.949	277.884	243.952	312.87	5905.87	301.46	642.301	282.134	143.681
306.23	7132.52	292.97	6234.41	302.66	720.113	289.69	710.385	289.96	174.661	309.95	5917.44	301.41	737.064	286.31	126.71	314.24	5993.21	303.42	734.275	277.919	243.309	312.89	5893.71	301.48	640.907	282.155	143.405
306.25	7113.74	292.99	6220.27	302.69	718.113	289.72	709.099	289.99	174.28	309.97	5903.27	301.44	733.727	286.33	126.53	314.26	5981.59	303.44	732.944	277.944	242.745	312.91	5879.64	301.5	639.829	282.179	143.164
306.27	7099.32	293	6208.77	302.71	716.642	289.73	708.088	290.01	173.962	309.99	5891.48	301.45	732.308	286.34	126.313	314.28	5967.74	303.47	731.437	277.981	242.102	312.93	5867.81	301.52	638.475	282.2	142.898
306.3	7081.93	293.02	6195.4	302.74	715.328	289.78	706.203	290.04	173.606	310	5877.08	301.49	730.732	286.37	126.129	314.3	5956.24	303.49	730.144	278.005	241.539	312.95	5853.71	301.54	637.348	282.222	142.67
306.31	7068.76	293.04	6184.27	302.76	713.955	289.78	704.76	290.07	173.284	310.02	5864.95	301.51	729.469	286.38	125.922	314.32	5941.48	303.51	728.509	278.043	240.884	312.97	5842.03	301.56	635.963	282.243	142.406
306.34	7051.1	293.06	6170.56	302.79	712.298	289.84	702.502	290.09	172.914	310.04	5851.13	301.54	727.814	286.41	125.751	314.33	5929.56	303.53	726.815	278.069	240.308	312.98	5828.66	301.58	634.807	282.266	142.175
306.35	7037.52	293.07	6158.78	302.81	710.934	289.84	701.029	290.12	172.6	310.06	5839.65	301.56	726.403	286.42	125.546	314.35	5913.84	303.56	725.13	278.103	239.637	313	5817.18	301.6	633.521	282.286	141.909
306.38	7020.05	293.09	6144.74	302.83	709.531	289.88	699.133	290.14	172.238	310.08	5826.12	301.58	724.699	286.45	125.375	314.37	5901.64	303.58	723.935	278.131	239.058	313.02	5803.31	301.61	632.65	282.312	141.68
306.39	7005.7	293.11	6132.61	302.85	708.363	289.88	697.58	290.17	171.93	310.1	5814.55	301.61	723.288	286.46	125.178	314.39	5887.66	303.61	722.465	278.163	238.372	313.04	5791.25	301.63	631.592	282.328	141.414
306.42	6986.66	293.12	6118.16	302.88	706.96	289.91	695.094	290.2	171.563	310.12	5800.7	301.64	721.73	286.48	125.007	314.41	5875.87	303.62	721.22	278.197	237.762	313.05	5777.77	301.64	630.513	282.352	141.184
306.43	6973.16	293.14	6106.59	302.9	705.713	289.92	693.188	290.22	171.252	310.14	5789.08	301.67	720.427	286.5	124.804	314.43	5861.73	303.64	719.554	278.228	237.045	313.07	5767.27	301.67	629.326	282.368	140.92
306.46	6956.16	293.16	6093.69	302.92	704.113	289.95	691.379	290.24	170.882	310.15	5775.7	301.68	718.652	286.52	124.63	314.44	5849.88	303.65	718.182	278.267	236.411	313.09	5754.39	301.69	628.286	282.391	140.691
306.47	6941.86	293.17	6082.02	302.94	702.885	289.95	689.904	290.26	170.571	310.17	5764.28	301.71	717.182	286.54	124.439	314.46	5835.26	303.69	715.152	278.294	235.685	313.11	5743.37	301.72	626.94	282.408	140.426
306.5	6923.72	293.19	6068.72	302.96	701.383	289.98	688.538	290.29	170.203	310.19	5750.49	301.72	715.613	286.55	124.273	314.48	5823.14	303.69	716.535	278.331	235.043	313.13	5730.26	301.74	625.97	282.433	140.197
306.51	6910.93	293.21	6058.03	303	700.066	290	687.23	290.31	169.893	310.21	5738.74	301.74	714.338	286.58	124.072	314.5	5808.39	303.73	712.248	278.362	234.322	313.14	5719.2	301.77	624.752	282.452	139.947
306.54	6895.55	293.22	6045.4	303.03	698.308	290.03	685.597	290.35	169.539	310.23	5725.69	301.77	712.769	286.59	123.883	314.52	5797.22	303.73	713.641	278.399	233.676	313.16	5705.69	301.78	623.703	282.477	139.727
306.55	6882.07	293.24	6034.08	303.05	696.952	290.06	684.318	290.37	169.245	310.25	5714.27	301.78	711.552	286.61	123.691	314.54	5784.14	303.77	710.679	278.431	232.936	313.18	5694.72	301.81	622.426	282.495	139.472
306.58	6864.6	293.25	6020.54	303.07	695.291	290.1	682.822	290.39	168.899	310.27	5700.68	301.8	709.933	286.63	123.521	314.55	5772.67	303.79	709.364	278.468	232.297	313.19	5681.23	301.82	621.415	282.519	139.251
306.59	6851.43	293.27	6009.65	303.09	693.964	290.12	681.818	290.41	168.603	310.28	5689.7	301.81	708.608	286.65	123.312	314.57	5759.28	303.82	707.784	278.499	231.556	313.21	5669.71	301.84	620.227	282.535	138.979
306.62	6835.43	293.29	5995.87	303.11	692.225	290.15	680.893	290.44	168.255	310.3	5676.16	301.84	707.323	286.67	123.134	314.59	5748.04	303.85	706.449	278.535	230.92	313.23	5656.67	301.85	619.365	282.558	138.758
306.63	6822.77	293.3	5984.8	303.15	690.937	290.17	679.761	290.46	167.965	310.32	5664.8	301.85	706.322	286.69	122.929	314.61	5734.62	303.88	704.888	278.567	230.194	313.25	5645.54	301.88	618.057	282.574	138.508
306.65	6807.04	293.32	5971.5	303.17	689.452	290.2	677.703	290.5	167.624	310.34	5651.78	301.88	704.918	286.7	122.762	314.62	5724.72	303.9	703.73	278.605	229.545	313.26	5632.77	301.88	616.987	282.598	138.293
306.67	6793.98	293.34	5960.15	303.19	688.311	290.22	676.502	290.51	167.331	310.36	5640.79	301.91	703.592	286.73	122.56	314.64	5712.24	303.92	702.492	278.635	228.801	313.28	5621.44	301.91	615.808	282.616	138.041
306.69	6777.76	293.35	5948.49	303.2	686.738	290.24	675.153	290.54	166.982	310.37	5628	301.93	702.06	286.74	122.386	314.66	5701.71	303.94	701.697	278.674	228.152	313.3	5608.31	301.91	614.44	282.64	137.825
306.7	6763.02	293.37	5937.48	303.23	685.282	290.26	674.069	290.57	166.694	310.39	5617.12	301.94	700.862	286.76	122.198	314.68	5690.18	303.95	700.077	278.705	227.403	313.31	5597.49	301.94	612.755	282.657	137.583
306.73	6745.1	293.39	5924.69	303.24	683.747	290.27	672.917	290.59	166.357	310.41	5603.7	301.98	698.102	286.78	122.03	314.7	5679.41	303.97	698.868	278.743	226.757	313.33	5584.15	301.94	611.575	282.68	137.37
306.75	6731.03	293.41	5914.1	303.27	682.576	290.29	671.577	290.61	166.075	310.43	5592.72	301.98	699.281	286.8	121.833	314.72	5667.14	303.98	697.414	278.776	226.004	313.35	5572.97	301.97	610.207	282.697	137.127
306.77	6713.25	293.42	5900.9	303.29	681.109	290.31	669.754	290.64	165.741	310.44	5580.04	302.04	695.105	286.81	121.662	314.73	5656.58	303.99	696.294	278.813	225.353	313.37	5560.27	301.98	608.977	282.721	136.921
306.78	6699.83	293.44	5890.05	303.31	679.958	290.32	668.473	290.66	165.459	310.46	5569.46	302.04	696.5	286.83	121.465	314.75	5644.03	304.01	694.957	278.846	224.635	313.38	5549.59	302.01	607.906	282.739	136.668
306.81	6683.27	293.46	5877.75	303.34	678.324	290.34	666.975	290.69	165.128	310.48	5556.84	302.07	692.343	286.85	121.296	314.77	5633.71	304.03	693.758	278.88	224.002	313.4	5536.92	302.03	606.825	282.762	136.447
306.82	6669.64	293.47	5867.17	303.36	676.965	290.37	665.703	290.71	164.844	310.5	5546.51	302.08	693.463	286.87	121.108	314.79	5621.04	304.05	692.028	278.916	223.282	313.42	5526.21	302.05	605.347	282.779	136.191
306.85	6651.21	293.49	5854.82	303.39	675.37	290.4	664.57	290.73	164.493	310.51	5534.4	302.12	691.006	286.89	120.94	314.8	5610.28	304.08	690.416	278.951	222.655	313.44	5513.29	302.07	604.514	282.803	135.98
306.86	6638.56	293.5	5844.21	303.43	674.473	290.42	663.475	290.76	164.206	310.54	5512.28	302.13	689.796	286.91	120.748	314.83	5597.55	304.11	688.813	278.984	221.94	313.45	5502.52	302.1	603.7	282.821	135.744
306.89	6622.74	293.52	5831.8	303.46	673.124	290.44	661.828	290.78	163.881	310.54	5524.08	302.17	687.18	286.92	120.589	314.84	5587.12	304.13	687.485	279.022	221.325	313.47	5490.07	302.12	602.787	282.845	135.537
306.9	6609.89	293.53	5820.95	303.48	671.971	290.46	660.891	290.81	163.609	310.57	5501.87	302.17	688.4	286.94	120.402	314.86	5575.33	304.16	685.921	279.053	220.633	313.49	5479.34	302.14	601.845	282.862	135.304
306.92	6593.07	293.55	5808.38	303.51	670.543	290.48	659.52	290.83	163.298	310.58	5489.63	302.19	686.02	286.96	120.24	314.87	5565.49	304.18	684.603	279.088	220.036	313.51	5467.08	302.16	601.11	282.885	135.094
306.93	6580.34	293.57	5798.08	303.52	669.39	290.52	658.188	290.85	163.028	310.6	5479.18	302.2	684.918	286.98	120.054	314.89	5551.59	304.21	682.9	279.12	219.346	313.52	5456.64	302.17	600.128	282.901	134.847
306.96	6565.08	293.58	5785.9	303.54	668.375	290.54	656.836	290.88	162.695	310.61	5466.58	302.23	683.324	287	119.895	314.9	5541.34	304.23	681.562	279.158	218.762	313.54	5443.84	302.19	599.284	282.924	134.637
306.97	6553.26	293.6	5775.6	303.56	667.399	290.55	655.771	290.9	162.413	310.64	5455.97	302.25	682.143	287.02	119.715	314.92	5529.72	304.26	680.086	279.189	218.092	313.56	5433.58	302.2	598.47	282.94	134.398
307	6537.58	293.61	5763.18	303.58	666.295	290.57	654.241	290.93	162.09	310.65	5443.83	302.27	680.696	287.04	119.574	314.94	5519.94	304.28	678.846	279.223	217.504	313.58	5422.23	302.22	597.636	282.964	134.19
307.01	6525.55	293.63	5753.21	303.59	665.28	290.59	653.037	290.95	161.819	310.67	5433.54	302.29	679.554	287.06	119.383	314.96	5507.2	304.31	676.128	279.255	216.832	313.6	5412.31	302.24	596.613	282.98	133.952
307.04	6510.9	293.65	5741.36	303.61	664.254	290.61	651.714	290.98	161.5	310.68	5421.64	302.31	678.265	287.07	119.219	314.97	5497.1	304.31	677.339	279.289	216.255	313.61	5399.44	302.26	595.858	283.004	133.747
307.05	6499.54	293.66	5731.7	303.63	663.239	290.64	650.312	291	161.222	310.71	5411.79	302.34	677.073	287.09	119.03	314.99	5484.86	304.35	673.597	279.319	215.592	313.63	5388.97	302.27	594.567	283.02	133.511
307.07	6484.25	293.68	5719.27	303.65	662.016	290.66	649.008	291.03	160.894	310.72	5400	302.37	675.32	287.11	118.868	315	5474.35	304.35	674.69	279.357	215.019	313.64	5376.86	302.3	593.623	283.044	133.304
307.09	6472.25	293.7	5708.76	303.66	660.941	290.69	648.129	291.05	160.627	310.74	5390.06	302.4	674.158	287.13	118.684	315.02	5462.17	304.39	671.341	279.386	214.369	313.66	5366.66	302.32	592.362	283.06	133.066
307.11	6458.1	293.71	5697.08	303.68	659.392	290.7	646.914	291.07	160.321	310.75	5378.15	302.41	672.927	287.14	118.519	315.04	5452.34	304.39	672.415	279.424	213.805	313.68	5354.3	302.34	591.438	283.083	132.859
307.12	6446	293.73	5687.14	303.71	658.395	290.74	645.63	291.09	160.059	310.78	5356.16	302.44	671.784	287.16	118.332	315.06	5440.43	304.42	668.808	279.452	213.157	313.7	5344.08	302.36	590.256	283.098	132.626
307.15	6431.12	293.74	5675.34	303.73	657.093	290.75	643.911	291.12	159.751	310.78	5368.02	302.46	670.237	287.18	118.168	315.07	5430.68	304.42	669.823	279.491	212.583	313.71	5332.36	302.38	589.282	283.12	132.435
307.16	6419.44	293.76	5665.59	303.76	655.79	290.78	642.646	291.14	159.486	310.81	5346.64	302.48	669.025	287.2	117.97	315.09	5418.99	304.45	667.547	279.518	211.941	313.73	5322.12	302.39	588.049	283.139	132.203
307.18	6404.25	293.77	5654.19	303.78	653.935	290.78	641.243	291.16	159.187	310.82	5335.42	302.5	667.596	287.22	117.803	315.11	5409.15	304.47	666.601	279.556	211.392	313.75	5310.24	302.41	587.085	283.16	132.005
307.19	6392.15	293.79	5644.5	303.81	652.721	290.82	640.254	291.19	158.926	310.85	5313.91	302.51	666.699	287.24	117.611	315.13	5397.5	304.49	665.299	279.582	210.759	313.77	5300.02	302.43	586.191	283.18	131.778
307.22	6376.88	293.81	5632.99	303.84	652.119	290.83	638.841	291.21	158.62	310.85	5325.77	302.54	665.526	287.25	117.456	315.14	5387.13	304.52	664.116	279.618	210.212	313.78	5287.78	302.44	585.177	283.2	131.581
307.23	6365.11	293.82	5623.44	303.86	651.043	290.85	637.684	291.24	158.357	310.88	5293.14	302.56	664.501	287.27	117.265	315.16	5374.96	304.53	662.509	279.648	209.591	313.8	5277.76	302.47	583.934	283.22	131.359
307.26	6350.25	293.84	5611.69	303.88	649.937	290.86	636.112	291.26	158.047	310.88	5304.31	302.6	663.387	287.29	117.104	315.17	5365.74	304.57	661.365	279.686	209.05	313.82	5265.73	302.48	583.009	283.24	131.163
307.27	6338.26	293.85	5601.33	303.89	648.722	290.89	634.935	291.28	157.787	310.91	5283.61	302.61	662.331	287.31	116.921	315.19	5354.87	304.58	659.984	279.716	208.433	313.83	5255.9	302.51	581.895	283.26	130.928
307.29	6323.53	293.87	5590.02	303.93	646.272	290.92	633.58	291.3	157.494	310.92	5272.1	302.64	660.96	287.32	116.765	315.21	5345.35	304.61	658.701	279.753	207.9	313.85	5243.95	302.52	581.08	283.28	130.727
307.3	6311.91	293.89	5580.58	303.93	647.26	290.93	632.521	291.33	157.234	310.94	5262.81	302.65	659.826	287.34	116.582	315.23	5333.61	304.62	657.36	279.779	207.298	313.87	5233.86	302.55	580.125	283.3	130.495
307.33	6297.86	293.9	5569.66	303.96	644.454	290.96	631.779	291.35	156.924	310.95	5251.77	302.68	658.711	287.36	116.429	315.24	5324.68	304.65	656.126	279.815	206.77	313.88	5222.01	302.57	579.2	283.32	130.305
307.34	6286.34	293.92	5560.04	303.97	645.324	290.97	630.523	291.37	156.668	310.97	5241.74	302.69	657.596	287.38	116.256	315.26	5314.44	304.66	654.606	279.84	206.162	313.9	5212.38	302.59	578.165	283.34	130.077
307.36	6271.47	293.93	5549.57	304	642.587	291	629.316	291.39	156.377	310.99	5230.58	302.7	656.363	287.39	116.108	315.27	5305.61	304.69	653.837	279.877	205.642	313.92	5201.08	302.62	577.409	283.36	129.883
307.38	6260.02	293.95	5540.32	304.01	641.668	291.02	628.297	291.42	156.128	311	5221.47	302.72	655.287	287.41	115.939	315.29	5294.52	304.7	652.879	279.904	205.051	313.94	5192.23	302.63	576.922	283.38	129.665
307.4	6245.47	293.96	5529.81	304.05	641.046	291.04	627.475	291.44	155.828	311.02	5210.07	302.74	653.807	287.43	115.785	315.3	5284.08	304.72	652.08	279.941	204.546	313.95	5181.23	302.65	576.186	283.4	129.478
307.41	6233.9	293.98	5520.74	304.06	640.067	291.06	626.436	291.46	155.573	311.03	5200.59	302.76	652.612	287.45	115.605	315.32	5272.35	304.73	651.161	279.968	203.971	313.97	5171.95	302.68	575.111	283.42	129.251
307.43	6218.22	293.99	5508.4	304.08	639.049	291.08	625.168	291.48	155.273	311.05	5189.53	302.77	651.279	287.47	115.449	315.34	5262.64	304.76	650.342	280.005	203.469	313.98	5160.53	302.69	574.235	283.44	129.065
307.45	6208.58	294.01	5499.26	304.11	638.169	291.11	624.039	291.51	155.023	311.06	5180.4	302.79	650.203	287.49	115.267	315.36	5249.47	304.78	649.157	280.033	202.893	314	5151.06	302.71	573.16	283.46	128.839
307.47	6196.47	294.02	5488.43	304.13	636.913	291.13	622.029	291.53	154.739	311.08	5169.59	302.81	648.653	287.51	115.114	315.37	5239.7	304.81	647.339	280.068	202.405	314.02	5139.66	302.71	572.363	283.47	128.651
307.49	6186.87	294.03	5478.88	304.16	634.312	291.15	621.058	291.56	154.489	311.09	5160.39	302.83	647.507	287.52	114.942	315.39	5228.2	304.81	648.337	280.095	201.843	314.03	5129.92	302.72	571.408	283.5	128.431
307.5	6174.35	294.05	5468.52	304.16	635.815	291.16	619.662	291.58	154.208	311.11	5148.98	302.87	646.134	287.54	114.801	315.4	5218.73	304.84	646.48	280.127	201.348	314.05	5118.39	302.73	570.571	283.51	128.238
307.52	6164.32	294.06	5459.65	304.18	633.035	291.19	618.741	291.6	153.962	311.12	5139.62	302.88	645.146	287.56	114.64	315.42	5207.63	304.86	645.018	280.156	200.781	314.06	5109.16	302.75	569.287	283.53	128.022
307.54	6151.95	294.08	5449.42	304.2	630.711	291.2	616.987	291.62	153.678	311.15	5119.54	302.9	644.03	287.58	114.492	315.44	5198.37	304.89	643.793	280.191	200.302	314.08	5098.37	302.76	568.461	283.55	127.837
307.56	6142.23	294.1	5440.82	304.22	629.711	291.23	616.095	291.65	153.434	311.15	5128.89	302.92	643.091	287.6	114.316	315.45	5187.32	304.9	642.202	280.221	199.738	314.1	5089.22	302.77	567.614	283.57	127.625
307.57	6130.14	294.11	5430.77	304.24	628.356	291.24	614.995	291.67	153.151	311.18	5099.88	302.95	641.184	287.61	114.177	315.47	5178.38	304.92	641.015	280.253	199.253	314.11	5078.76	302.79	566.976	283.59	127.44
307.59	6119.49	294.13	5422.39	304.27	627.217	291.26	614.064	291.69	152.907	311.18	5109.09	302.95	642.004	287.63	114.015	315.48	5168.09	304.93	639.78	280.282	198.696	314.13	5069.74	302.81	565.97	283.61	127.219
307.61	6106.29	294.15	5412.28	304.29	625.951	291.27	613.072	291.71	152.618	311.21	5080.13	302.98	640.077	287.65	113.868	315.5	5158.97	304.96	638.771	280.31	198.224	314.14	5059.08	302.83	565.263	283.63	127.035
307.63	6095.37	294.16	5403.87	304.31	625	291.3	612.061	291.73	152.372	311.21	5088.88	302.99	639.068	287.67	113.701	315.52	5147.58	304.98	637.546	280.34	197.67	314.16	5049.91	302.86	564.067	283.65	126.814
307.64	6081.99	294.18	5393.56	304.33	624.06	291.32	610.594	291.76	152.088	311.24	5069.84	303.02	636.577	287.68	113.558	315.53	5138.1	305	636.152	280.371	197.195	314.17	5039.17	302.88	563.34	283.67	126.626
307.67	6071.29	294.19	5384.74	304.35	623.228	291.35	609.305	291.78	151.849	311.25	5061.19	303.02	637.743	287.7	113.378	315.55	5127.52	305.01	635.133	280.402	196.648	314.19	5030.13	302.91	562.284	283.69	126.407
307.68	6056.89	294.21	5375	304.38	622.218	291.38	608.184	291.8	151.577	311.27	5050.86	303.05	634.401	287.72	113.231	315.56	5118.93	305.03	634.243	280.432	196.18	314.2	5019.98	302.93	561.377	283.71	126.227
307.7	6045.75	294.22	5366.07	304.41	621.247	291.39	607.331	291.83	151.344	311.28	5042.14	303.05	635.291	287.74	113.057	315.58	5108.12	305.05	633.244	280.462	195.633	314.22	5011.26	302.95	560.241	283.73	126.017
307.72	6032.29	294.24	5355.55	304.43	620.286	291.41	606.032	291.85	151.081	311.3	5031.34	303.08	633.303	287.76	112.899	315.6	5099.05	305.06	632.363	280.492	195.167	314.23	5000.57	302.96	559.443	283.75	125.839
307.73	6021.65	294.25	5346.02	304.45	619.504	291.43	604.97	291.87	150.846	311.31	5022.42	303.1	632.215	287.78	112.734	315.61	5088.77	305.09	631.235	280.523	194.636	314.25	4991.55	302.98	558.566	283.77	125.633
307.75	6008.15	294.26	5335	304.46	618.444	291.46	603.66	291.89	150.57	311.34	5011.76	303.14	630.85	287.79	112.595	315.63	5079.9	305.1	630.157	280.554	194.17	314.26	4981.36	302.99	557.699	283.78	125.448
307.77	5997.68	294.28	5325.4	304.48	617.562	291.47	602.628	291.92	150.338	311.35	5002.64	303.15	629.909	287.81	112.436	315.65	5069.55	305.12	629.217	280.585	193.637	314.28	4972.44	303	556.881	283.8	125.229
307.78	5984.4	294.29	5315.24	304.51	616.115	291.51	601.547	291.94	150.06	311.37	4992.03	303.18	629.029	287.83	112.298	315.66	5061.27	305.13	628.257	280.613	193.173	314.29	4962.24	303.01	556.134	283.82	125.043
307.8	5973.71	294.3	5306.52	304.54	615.253	291.51	600.564	291.96	149.828	311.38	4983.56	303.2	628.227	287.85	112.132	315.68	5051.39	305.16	626.871	280.644	192.642	314.32	4953.81	303.03	555.007	283.84	124.83
307.82	5960.06	294.32	5296.5	304.55	614.083	291.53	599.174	291.98	149.553	311.4	4973.45	303.23	626.891	287.86	111.991	315.69	5043.28	305.17	625.842	280.672	192.189	314.33	4945.47	303.03	554.279	283.86	124.652
307.84	5949.64	294.33	5288.44	304.58	613.052	291.54	597.854	292	149.324	311.41	4965.26	303.25	625.842	287.88	111.825	315.71	5033.73	305.2	625.248	280.702	191.68	314.35	4937.2	303.06	553.371	283.88	124.441
307.85	5936.42	294.35	5279.17	304.6	611.456	291.57	596.504	292.02	149.058	311.44	4947.85	303.26	624.465	287.89	111.691	315.72	5025.79	305.22	624.307	280.732	191.235	314.36	4927.24	303.06	552.443	283.9	124.249
307.87	5926.21	294.37	5271.44	304.61	610.375	291.59	595.451	292.05	148.831	311.44	4956.42	303.28	623.911	287.91	111.537	315.74	5016.19	305.24	623.079	280.766	190.718	314.38	4919.09	303.11	551.276	283.91	124.052
307.89	5913.55	294.38	5262.35	304.63	608.977	291.62	594.18	292.07	148.567	311.47	4929.15	303.3	622.891	287.92	111.407	315.76	5008.7	305.27	620.712	280.792	190.272	314.39	4909.6	303.11	550.528	283.93	123.875
307.91	5903.56	294.4	5254.05	304.65	607.956	291.62	593.166	292.09	148.342	311.47	4937.73	303.32	621.98	287.94	111.25	315.77	4998.83	305.27	622.158	280.826	189.768	314.41	4901.33	303.16	549.41	283.95	123.664
307.92	5891.14	294.41	5244.22	304.68	606.885	291.64	592.054	292.12	148.086	311.5	4910.99	303.33	620.603	287.96	111.115	315.79	4990.64	305.32	618.543	280.851	189.341	314.42	4891.84	303.16	548.502	283.97	123.486
307.94	5881.91	294.43	5235.6	304.69	605.784	291.66	591.08	292.13	147.866	311.5	4919.32	303.34	619.563	287.98	110.96	315.8	4981.52	305.32	619.731	280.883	188.839	314.44	4883.36	303.19	547.584	283.99	123.28
307.95	5869.98	294.44	5226.16	304.72	604.038	291.69	590.057	292.16	147.608	311.53	4901.07	303.37	618.454	287.99	110.828	315.82	4973.4	305.36	615.838	280.905	188.402	314.45	4873.95	303.2	546.816	284.01	123.11
307.98	5860.39	294.46	5218.21	304.72	604.742	291.7	589.391	292.18	147.384	311.54	4892.87	303.37	619.385	288.01	110.666	315.83	4963.98	305.36	617.641	280.94	187.895	314.47	4865.82	303.22	545.957	284.03	122.911
307.99	5848.46	294.47	5208.34	304.76	603.154	291.72	588.566	292.2	147.108	311.56	4883.25	303.41	616.948	288.03	110.531	315.85	4956.47	305.39	613.667	280.964	187.468	314.49	4857.16	303.23	545.328	284.05	122.737
308.01	5839.13	294.49	5200.13	304.78	602.261	291.74	587.602	292.22	146.885	311.57	4874.81	303.42	618.127	288.05	110.376	315.86	4947.32	305.39	614.956	280.998	186.97	314.5	4849.38	303.25	544.6	284.06	122.537
308.02	5827.61	294.5	5190.51	304.81	601.299	291.76	586.419	292.25	146.644	311.59	4865	303.44	614.966	288.06	110.241	315.88	4938.97	305.42	612.606	281.023	186.548	314.51	4839.79	303.25	543.941	284.08	122.36
308.04	5818.73	294.52	5181.85	304.82	600.356	291.78	585.455	292.27	146.429	311.6	4857.48	303.46	615.867	288.08	110.077	315.9	4928.48	305.45	611.496	281.058	186.069	314.53	4831.47	303.27	543.092	284.1	122.161
308.06	5807.14	294.53	5172.03	304.85	599.174	291.8	584.113	292.29	146.172	311.62	4848.19	303.49	612.983	288.1	109.939	315.92	4920.1	305.46	610.703	281.082	185.65	314.54	4821.72	303.28	542.423	284.12	121.993
308.08	5797.15	294.55	5164.38	304.86	598.271	291.82	583.098	292.31	145.948	311.63	4840.23	303.51	613.835	288.12	109.778	315.93	4909.78	305.47	609.701	281.115	185.164	314.56	4812.98	303.31	541.534	284.14	121.794
308.09	5785.2	294.56	5154.22	304.89	597.278	291.84	581.796	292.34	145.694	311.65	4831.45	303.54	610.227	288.13	109.645	315.95	4901.91	305.5	608.7	281.137	184.747	314.57	4802.89	303.33	540.675	284.16	121.616
308.11	5776.45	294.58	5145.65	304.9	596.355	291.87	580.503	292.35	145.484	311.66	4824.13	303.54	611.099	288.15	109.49	315.96	4892.4	305.52	607.678	281.17	184.268	314.59	4795.08	303.36	539.636	284.18	121.416
308.13	5766.02	294.59	5136.66	304.93	594.329	291.88	579.101	292.38	145.242	311.69	4814.81	303.56	608.402	288.16	109.358	315.98	4884.66	305.55	606.677	281.193	183.855	314.61	4785.86	303.37	538.807	284.2	121.235
308.14	5757.35	294.61	5128.23	304.93	595.223	291.9	578.175	292.39	145.029	311.7	4806.81	303.59	606.2	288.18	109.202	315.99	4875.59	305.56	605.615	281.224	183.39	314.62	4778.28	303.39	537.788	284.22	121.037
308.16	5745.07	294.62	5118.61	304.96	593.226	291.92	577.031	292.42	144.774	311.72	4797.71	303.59	607.41	288.2	109.072	316.01	4868.27	305.59	604.792	281.249	182.981	314.64	4769.22	303.41	536.919	284.24	120.862
308.17	5735.9	294.64	5110.87	304.98	592.362	291.93	576.076	292.44	144.557	311.73	4789.91	303.62	604.266	288.22	108.92	316.02	4859.19	305.6	603.531	281.28	182.516	314.66	4761.37	303.42	536.05	284.25	120.664
308.19	5724.46	294.65	5101.14	304.99	591.607	291.97	575.051	292.46	144.301	311.75	4781.05	303.65	605.248	288.23	108.783	316.04	4851.71	305.63	602.579	281.307	182.118	314.67	4752.04	303.45	535.691	284.27	120.492
308.21	5715.49	294.66	5092.82	305.02	590.812	291.98	574.255	292.48	144.088	311.76	4773.5	303.66	602.212	288.25	108.623	316.05	4842.36	305.65	601.457	281.336	181.658	314.69	4744.18	303.45	534.731	284.29	120.291
308.22	5703.86	294.68	5083.08	305.03	589.59	292.01	573.249	292.5	143.834	311.78	4764.32	303.68	603.323	288.26	108.494	316.07	4834.48	305.66	600.514	281.362	181.25	314.7	4734.87	303.46	534.521	284.31	120.118
308.24	5695.24	294.69	5074.84	305.06	588.646	292.02	572.343	292.52	143.626	311.8	4756.39	303.71	600.336	288.28	108.343	316.08	4825.16	305.68	599.234	281.39	180.796	314.72	4727.18	303.47	533.602	284.33	119.917
308.26	5684.13	294.71	5065.07	305.07	587.652	292.05	571.069	292.55	143.384	311.81	4746.95	303.72	601.338	288.29	108.206	316.1	4817.6	305.69	598.261	281.417	180.407	314.73	4717.74	303.5	532.812	284.35	119.744
308.27	5676.22	294.72	5056.59	305.1	586.767	292.06	570.073	292.56	143.176	311.82	4739.12	303.74	599.373	288.32	108.051	316.11	4807.95	305.71	597.318	281.446	179.975	314.75	4710.15	303.52	531.862	284.37	119.543
308.29	5666.08	294.73	5046.92	305.11	585.624	292.09	569.058	292.59	142.931	311.84	4730.17	303.76	598.43	288.33	107.922	316.13	4801.02	305.73	596.424	281.473	179.588	314.77	4701.12	303.54	531.062	284.39	119.368
308.3	5657.91	294.75	5038.92	305.13	584.699	292.1	568.122	292.61	142.729	311.85	4722.36	303.77	597.546	288.35	107.775	316.15	4794.01	305.75	595.272	281.502	179.148	314.78	4693.13	303.55	530.003	284.4	119.159
308.32	5648.36	294.76	5029.78	305.15	583.208	292.12	566.956	292.63	142.489	311.87	4712.96	303.8	595.57	288.36	107.645	316.16	4786.7	305.77	594.299	281.529	178.762	314.79	4683.8	303.56	528.813	284.43	118.987
308.34	5640.15	294.78	5021.64	305.17	582.194	292.13	566.01	292.65	142.281	311.88	4705.05	303.8	596.404	288.38	107.499	316.18	4778.48	305.79	593.236	281.559	178.322	314.81	4676.3	303.58	527.973	284.44	118.789
308.35	5630.96	294.79	5011.35	305.19	581.02	292.14	565.034	292.67	142.031	311.9	4695.96	303.83	594.418	288.39	107.37	316.19	4770.35	305.81	592.412	281.585	177.933	314.83	4667.85	303.6	526.853	284.46	118.618
308.37	5622.79	294.8	5003.56	305.21	580.135	292.16	564.496	292.69	141.824	311.91	4688.32	303.84	593.445	288.42	107.225	316.21	4760.51	305.83	591.368	281.613	177.504	314.84	4660.57	303.61	526.053	284.48	118.416
308.38	5612.11	294.82	4994.64	305.23	579.021	292.18	563.47	292.71	141.562	311.93	4679.71	303.86	592.372	288.43	107.097	316.22	4752.48	305.84	590.524	281.639	177.127	314.86	4651.88	303.63	525.493	284.5	118.247
308.4	5604.15	294.83	4987.09	305.25	578.096	292.21	562.692	292.73	141.355	311.94	4672.12	303.89	590.424	288.45	106.949	316.24	4742.78	305.87	589.222	281.667	176.69	314.87	4645.5	303.64	524.843	284.52	118.05
308.42	5593.29	294.85	4978.33	305.27	577.061	292.23	561.766	292.75	141.114	311.96	4663.04	303.89	591.577	288.46	106.826	316.25	4734.79	305.88	588.268	281.692	176.316	314.89	4636.73	303.67	524.152	284.54	117.888
308.43	5584.37	294.86	4970.73	305.29	576.215	292.26	560.918	292.77	140.914	311.97	4655.51	303.92	589.58	288.48	106.681	316.26	4725.27	305.9	587.354	281.723	175.893	314.9	4629.68	303.69	523.372	284.55	117.703
308.45	5573.45	294.88	4961.63	305.3	575.3	292.28	559.812	292.8	140.681	311.99	4646.91	303.94	588.407	288.49	106.553	316.28	4717.9	305.91	586.549	281.748	175.528	314.92	4620.51	303.71	522.712	284.58	117.54
308.46	5564.95	294.89	4953.98	305.33	574.573	292.3	558.925	292.81	140.482	312	4639.39	303.96	587.503	288.52	106.41	316.29	4708.93	305.93	585.525	281.778	175.106	314.93	4612.73	303.73	521.871	284.59	117.347
308.48	5554.19	294.9	4944.73	305.34	573.618	292.32	557.719	292.84	140.245	312.01	4630.82	303.97	586.489	288.53	106.289	316.31	4701.44	305.95	584.59	281.8	174.734	314.94	4602.02	303.75	521.101	284.61	117.182
308.5	5545.99	294.91	4936.6	305.37	572.802	292.34	556.532	292.85	140.044	312.03	4623.36	304	584.54	288.55	106.149	316.32	4692.63	305.97	583.626	281.833	174.31	314.96	4594.38	303.77	520.24	284.63	116.992
308.52	5535.69	294.93	4927.26	305.38	571.667	292.35	555.545	292.88	139.806	312.04	4613.23	304	585.674	288.56	106.025	316.34	4684.93	305.99	582.771	281.854	173.946	314.97	4585.68	303.78	519.479	284.65	116.822
308.53	5528.09	294.94	4918.91	305.4	570.93	292.37	554.668	292.9	139.606	312.06	4605.93	304.04	583.676	288.58	105.869	316.35	4675.64	306.02	581.796	281.885	173.526	314.98	4578.42	303.79	518.568	284.67	116.61
308.55	5518.6	294.95	4909.31	305.42	569.855	292.38	553.531	292.92	139.373	312.07	4597.61	304.05	582.681	288.6	105.735	316.36	4667.71	306.03	581.02	281.909	173.165	315	4569.56	303.79	517.837	284.69	116.441
308.56	5511.07	294.97	4901.77	305.45	569.217	292.4	552.773	292.94	139.179	312.09	4590.57	304.07	580.692	288.61	105.592	316.38	4659.9	306.06	579.29	281.94	172.749	315.02	4562.21	303.81	516.917	284.71	116.25
308.58	5501.47	294.98	4893.04	305.47	568.202	292.41	551.775	292.96	138.946	312.1	4581.93	304.08	581.766	288.63	105.471	316.39	4652.72	306.06	580.145	281.963	172.383	315.03	4553.17	303.82	516.436	284.73	116.078
308.59	5493.74	294.99	4885.72	305.49	567.275	292.43	550.867	292.98	138.749	312.12	4574.74	304.1	579.946	288.65	105.33	316.41	4643.66	306.08	578.106	281.993	171.978	315.05	4546.16	303.83	515.535	284.75	115.875
308.61	5483.9	295.01	4876.93	305.52	566.359	292.45	549.829	293.01	138.526	312.13	4566.26	304.11	579.051	288.66	105.209	316.42	4636.41	306.09	577.26	282.017	171.623	315.06	4537.4	303.85	514.864	284.76	115.699
308.62	5475.59	295.02	4869.59	305.53	565.552	292.46	549.031	293.02	138.335	312.15	4559.3	304.13	578.195	288.68	105.076	316.44	4626.95	306.12	576.384	282.044	171.222	315.08	4529.91	303.86	514.083	284.78	115.501
308.64	5464.9	295.04	4860.87	305.57	563.41	292.48	548.023	293.05	138.113	312.16	4550.52	304.14	577.091	288.69	104.956	316.45	4618.94	306.13	575.718	282.067	170.868	315.09	4520.85	303.89	513.412	284.8	115.334
308.66	5456.57	295.05	4854.49	305.57	564.426	292.5	547.155	293.06	137.923	312.18	4543.49	304.16	576.155	288.71	104.816	316.47	4609.98	306.15	574.941	282.099	170.469	315.1	4513.44	303.9	512.641	284.83	115.137
308.68	5445.97	295.06	4845.83	305.59	561.586	292.52	545.987	293.09	137.683	312.19	4535.04	304.17	575.011	288.73	104.697	316.48	4602.92	306.16	574.145	282.12	170.123	315.12	4504.67	303.93	512.06	284.84	114.966
308.69	5437.35	295.07	4838.71	305.6	562.503	292.53	545.079	293.1	137.488	312.21	4527.58	304.2	574.195	288.75	104.56	316.5	4594.28	306.19	573.07	282.151	169.717	315.13	4497.48	303.95	511.178	284.86	114.77
308.71	5426.81	295.09	4829.81	305.63	559.832	292.56	544.12	293.13	137.256	312.22	4519.99	304.21	573.239	288.76	104.437	316.51	4586.9	306.21	572.234	282.173	169.369	315.15	4488.88	303.97	510.276	284.88	114.6
308.72	5419.45	295.1	4822.13	305.63	560.659	292.57	543.352	293.14	137.064	312.23	4512.98	304.24	572.294	288.78	104.295	316.53	4578.81	306.23	571.527	282.205	168.972	315.16	4481.7	303.99	509.505	284.9	114.401
308.74	5409.38	295.11	4814.35	305.66	558.746	292.59	542.353	293.17	136.864	312.25	4504.48	304.26	570.96	288.79	104.175	316.54	4572.09	306.24	570.89	282.228	168.624	315.18	4472.83	303.99	508.844	284.91	114.234
308.75	5400.95	295.13	4807.6	305.68	557.888	292.6	541.644	293.18	136.667	312.26	4496.83	304.28	570.044	288.81	104.044	316.55	4563.77	306.25	569.815	282.26	168.221	315.19	4465.32	304.01	508.002	284.93	114.046
308.77	5389.81	295.14	4798.86	305.7	556.891	292.64	540.705	293.21	136.439	312.27	4488.4	304.3	569.327	288.82	103.929	316.57	4556.48	306.27	568.859	282.284	167.884	315.21	4456.37	304.02	507.351	284.95	113.887
308.78	5381.38	295.15	4791.93	305.72	556.293	292.65	540.016	293.22	136.249	312.29	4481.55	304.32	568.699	288.84	103.788	316.58	4547.72	306.28	567.664	282.312	167.485	315.22	4448.54	304.04	506.469	284.97	113.706
308.8	5371.6	295.17	4783.78	305.74	555.316	292.68	538.967	293.25	136.029	312.3	4473.2	304.33	567.763	288.86	103.67	316.59	4540.63	306.3	565.821	282.334	167.139	315.23	4439.44	304.05	505.797	284.99	113.549
308.81	5363.76	295.18	4776.92	305.76	554.418	292.69	538.268	293.27	135.847	312.32	4466.21	304.34	567.066	288.87	103.524	316.61	4531.85	306.3	566.797	282.365	166.748	315.25	4432.15	304.06	504.995	285.01	113.356
308.84	5353.82	295.19	4768.73	305.77	553.411	292.7	537.249	293.29	135.631	312.33	4458.02	304.36	566.429	288.89	103.41	316.62	4524.44	306.33	565.004	282.385	166.404	315.26	4423.37	304.07	504.324	285.02	113.196
308.85	5346	295.21	4761.94	305.79	552.693	292.73	536.39	293.31	135.445	312.35	4442.83	304.38	565.731	288.9	103.276	316.63	4515.65	306.34	563.828	282.418	166.013	315.27	4416.16	304.1	503.572	285.05	113.017
308.87	5336.04	295.22	4753.97	305.81	551.745	292.75	535.39	293.33	135.226	312.35	4450.8	304.4	564.067	288.92	103.159	316.65	4508.49	306.37	562.971	282.438	165.679	315.29	4407.52	304.11	502.91	285.06	112.853
308.88	5327.77	295.23	4747.48	305.82	550.957	292.77	534.501	293.34	135.038	312.37	4436.42	304.4	564.825	288.94	103.025	316.66	4499.64	306.38	561.915	282.47	165.32	315.3	4400.15	304.13	502.118	285.08	112.665
308.9	5317.43	295.25	4739.53	305.84	550.328	292.79	533.472	293.37	134.817	312.38	4428.46	304.44	561.985	288.96	102.911	316.68	4492.29	306.41	561.148	282.491	164.988	315.31	4391.39	304.13	501.386	285.1	112.507
308.91	5309.03	295.26	4732.79	305.85	549.53	292.8	532.512	293.39	134.637	312.4	4421.79	304.44	562.862	288.97	102.778	316.69	4483.98	306.42	560.6	282.522	164.599	315.32	4384.35	304.16	500.714	285.12	112.326
308.93	5298.45	295.27	4726	305.87	548.682	292.82	531.543	293.41	134.42	312.41	4413.79	304.48	561.008	288.99	102.658	316.71	4476.57	306.44	559.812	282.545	164.266	315.34	4375.77	304.17	500.103	285.13	112.165
308.94	5290.37	295.28	4719.05	305.89	547.963	292.83	530.663	293.43	134.233	312.43	4407.06	304.49	560.141	289	102.514	316.72	4466.84	306.46	558.795	282.575	163.89	315.35	4369.19	304.21	499.441	285.16	111.985
308.96	5279.1	295.3	4710.84	305.91	546.985	292.86	529.653	293.45	134.005	312.44	4399.12	304.52	557.998	289.02	102.394	316.73	4460.39	306.47	558.108	282.597	163.568	315.37	4361.2	304.22	498.809	285.17	111.829
308.97	5270.55	295.31	4704.04	305.92	546.277	292.86	528.923	293.47	133.822	312.46	4385.12	304.52	558.905	289.03	102.26	316.74	4451.94	306.5	557.19	282.624	163.193	315.38	4354.3	304.23	497.836	285.19	111.648
308.99	5259.33	295.32	4697.69	305.95	545.188	292.9	528.013	293.49	133.607	312.46	4392.58	304.55	557.14	289.05	102.141	316.76	4445.57	306.51	556.482	282.648	162.866	315.39	4345.92	304.25	497.133	285.21	111.492
309	5251.63	295.33	4690.81	305.97	544.32	292.9	527.203	293.51	133.426	312.49	4370.25	304.56	556.423	289.06	102.008	316.77	4438.21	306.53	555.675	282.675	162.487	315.41	4338.74	304.27	496.321	285.23	111.318
309.02	5241.82	295.35	4682.36	306	543.322	292.94	526.223	293.54	133.22	312.49	4378.36	304.59	554.777	289.08	101.894	316.79	4432.12	306.55	554.987	282.7	162.162	315.42	4330.34	304.29	495.608	285.24	111.169
309.03	5233.65	295.36	4675.78	306.02	542.573	292.94	525.343	293.55	133.036	312.52	4356.51	304.59	555.545	289.09	101.755	316.8	4424.58	306.57	553.78	282.723	161.79	315.43	4322.31	304.31	494.806	285.26	110.994
309.05	5224.16	295.38	4667.96	306.04	541.624	292.97	524.242	293.58	132.823	312.52	4363.77	304.61	553.83	289.11	101.64	316.82	4418.33	306.59	553.072	282.751	161.468	315.45	4314.05	304.32	494.013	285.27	110.844
309.06	5216.73	295.39	4661.34	306.06	540.725	292.98	523.402	293.59	132.643	312.55	4342.1	304.62	552.972	289.12	101.503	316.83	4410.99	306.61	552.084	282.773	161.096	315.46	4307.09	304.33	493.23	285.3	110.673
309.08	5207.35	295.41	4647.29	306.08	539.866	293	522.211	293.62	132.425	312.55	4350.05	304.65	551.935	289.14	101.391	316.85	4404.38	306.63	551.286	282.803	160.778	315.47	4299.26	304.34	492.528	285.31	110.53
309.09	5200.31	295.41	4653.79	306.11	538.598	293.01	521.451	293.63	132.253	312.58	4327.44	304.67	551.306	289.16	101.261	316.86	4396.48	306.64	550.468	282.825	160.422	315.49	4293.16	304.36	491.936	285.33	110.363
309.11	5191.31	295.43	4639.93	306.11	539.137	293.02	520.58	293.65	132.042	312.58	4335.46	304.69	550.348	289.18	101.152	316.88	4389.8	306.66	549.7	282.855	160.108	315.5	4285.56	304.36	491.303	285.34	110.22
309.12	5183.97	295.44	4633.85	306.12	538.088	293.04	519.729	293.67	131.869	312.6	4320.76	304.71	549.7	289.19	101.016	316.89	4381.58	306.67	548.672	282.876	159.742	315.52	4278.69	304.38	490.611	285.36	110.054
309.14	5175.2	295.46	4626.52	306.14	536.44	293.06	518.849	293.69	131.662	312.61	4313.11	304.72	548.872	289.21	100.902	316.91	4375.44	306.7	547.874	282.907	159.429	315.53	4270.27	304.4	489.928	285.38	109.913
309.15	5167.77	295.47	4620.52	306.14	537.209	293.07	518.278	293.71	131.484	312.63	4306.49	304.74	548.053	289.22	100.784	316.92	4368.19	306.71	546.756	282.925	159.072	315.55	4263.14	304.41	488.924	285.4	109.757
309.17	5158.03	295.49	4613.22	306.16	535.471	293.08	517.667	293.73	131.274	312.64	4298.55	304.77	547.055	289.24	100.68	316.93	4361.95	306.73	546.077	282.957	158.761	315.56	4256.19	304.43	488.301	285.41	109.616
309.18	5150.42	295.5	4606.84	306.17	534.841	293.1	516.987	293.75	131.102	312.66	4284.76	304.78	546.366	289.25	100.553	316.95	4352.99	306.74	545.288	282.974	158.418	315.58	4249.11	304.45	487.639	285.43	109.452
309.2	5140.84	295.51	4599.18	306.2	534.031	293.12	516.135	293.77	130.9	312.66	4292.14	304.8	545.678	289.27	100.437	316.96	4346.35	306.76	544.58	283.007	158.11	315.59	4241.36	304.46	486.986	285.45	109.317
309.21	5133.18	295.52	4592.89	306.21	533.292	293.14	515.344	293.79	130.726	312.68	4278.23	304.81	544.949	289.28	100.301	316.97	4338.61	306.77	543.491	283.024	157.76	315.6	4234.73	304.48	486.173	285.46	109.161
309.23	5123.78	295.54	4585.49	306.25	532.032	293.17	514.133	293.81	130.518	312.69	4270.59	304.84	543.032	289.3	100.189	316.99	4332.03	306.8	542.623	283.059	157.456	315.61	4226.5	304.49	485.781	285.48	109.028
309.24	5116.93	295.55	4579.42	306.27	531.183	293.17	513.522	293.82	130.348	312.71	4264.14	304.84	543.921	289.31	100.054	317	4324.42	306.81	541.494	283.076	157.102	315.63	4219.59	304.5	484.656	285.5	108.868
309.26	5107.45	295.57	4564.22	306.29	530.223	293.2	512.49	293.85	130.141	312.72	4256.65	304.88	541.115	289.33	99.9415	317.01	4318.42	306.82	540.735	283.112	156.795	315.64	4211.05	304.51	484.093	285.52	108.743
309.27	5100.54	295.57	4571.8	306.31	529.423	293.21	511.799	293.86	129.97	312.73	4250.39	304.88	541.894	289.34	99.811	317.03	4310.86	306.84	539.886	283.125	156.441	315.65	4204.06	304.52	483.742	285.53	108.59
309.29	5092.52	295.59	4557.49	306.33	528.733	293.25	510.798	293.89	129.767	312.75	4243.24	304.9	540.336	289.36	99.6949	317.04	4304.46	306.86	538.997	283.16	156.136	315.66	4195.81	304.55	483.229	285.55	108.459
309.3	5085.72	295.6	4551.15	306.35	528.063	293.25	510.116	293.9	129.599	312.76	4237.23	304.92	539.577	289.37	99.5616	317.05	4297.15	306.88	538.028	283.17	155.791	315.68	4189.08	304.56	482.446	285.56	108.305
309.32	5077.14	295.62	4537.71	306.36	527.023	293.29	509.395	293.93	129.408	312.77	4228.78	304.94	538.298	289.39	99.4589	317.07	4291.23	306.89	537.269	283.21	155.483	315.69	4182.61	304.57	481.873	285.58	108.168
309.33	5069.98	295.62	4543.92	306.37	526.293	293.29	508.693	293.94	129.236	312.79	4222.31	304.95	537.339	289.4	99.3324	317.08	4283.92	306.91	536.44	283.22	155.141	315.71	4176.15	304.6	481.26	285.6	108.01
309.35	5061.04	295.64	4529.98	306.38	525.633	293.32	507.781	293.96	129.012	312.8	4214.56	304.97	536.02	289.42	99.2217	317.09	4277.3	306.92	535.88	283.26	154.845	315.72	4169.04	304.6	480.446	285.61	107.878
309.36	5054.39	295.65	4523.69	306.4	524.192	293.34	507.14	293.98	128.848	312.81	4208.59	304.97	536.779	289.44	99.0888	317.11	4269.81	306.96	534.861	283.27	154.505	315.73	4162.73	304.64	479.954	285.63	107.731
309.37	5046.55	295.67	4510.16	306.4	525.013	293.37	506.288	294	128.669	312.82	4201.72	304.99	535.301	289.45	98.9778	317.12	4263.86	306.96	535.401	283.31	154.198	315.74	4155.77	304.65	479.331	285.65	107.596
309.38	5039.99	295.67	4516.33	306.44	522.822	293.38	505.456	294.02	128.504	312.84	4195.73	305.01	534.621	289.47	98.8536	317.14	4257.48	306.97	533.382	283.32	153.861	315.76	4150.28	304.67	478.245	285.66	107.436
309.4	5032.17	295.69	4502.85	306.44	523.772	293.39	504.514	294.04	128.308	312.85	4188.62	305.03	533.782	289.48	98.7453	317.15	4251.91	306.98	534.002	283.36	153.569	315.77	4144.39	304.67	477.522	285.68	107.302
309.41	5025.49	295.7	4496.24	306.48	521.14	293.4	503.692	294.06	128.14	312.87	4182.55	305.04	533.132	289.5	98.6303	317.17	4245.19	307.01	532.542	283.37	153.226	315.79	4138.66	304.7	476.858	285.69	107.152
309.43	5017.81	295.72	4489.15	306.48	522.061	293.41	502.75	294.08	127.937	312.88	4175.15	305.05	532.592	289.51	98.5212	317.18	4239.5	307.02	531.763	283.41	152.945	315.8	4132.08	304.71	476.265	285.71	107.024
309.44	5010.85	295.73	4482.77	306.51	519.559	293.43	502.008	294.09	127.771	312.89	4169.24	305.08	532.013	289.53	98.4038	317.2	4232.73	307.06	530.043	283.42	152.615	315.81	4126.51	304.72	475.431	285.72	106.868
309.46	5002.51	295.74	4475.24	306.52	520.37	293.44	501.296	294.11	127.58	312.91	4161.91	305.09	531.963	289.54	98.3018	317.21	4227.1	307.06	530.833	283.46	152.328	315.82	4119.6	304.75	474.727	285.74	106.737
309.47	4995.73	295.75	4468.83	306.54	518.849	293.45	500.423	294.14	127.419	312.92	4155.7	305.13	530.573	289.56	98.1796	317.22	4220.81	307.08	528.953	283.47	151.972	315.84	4113.96	304.75	474.083	285.75	106.589
309.49	4987.82	295.77	4461.56	306.56	517.857	293.46	499.461	294.15	127.227	312.93	4148.44	305.13	531.383	289.57	98.0749	317.23	4215.28	307.1	528.473	283.5	151.69	315.85	4107.65	304.77	473.581	285.77	106.456
309.5	4981.23	295.78	4456.02	306.58	516.886	293.48	498.879	294.17	127.065	312.95	4142.63	305.16	529.103	289.59	97.9419	317.24	4208.21	307.12	527.663	283.52	151.37	315.87	4101.81	304.79	473.017	285.79	106.298
309.52	4972.86	295.79	4447.77	306.59	515.855	293.51	498.056	294.19	126.874	312.96	4135.65	305.16	529.923	289.6	97.8375	317.26	4202.85	307.14	526.933	283.55	151.089	315.88	4094.75	304.81	472.605	285.81	106.173
309.53	4966.14	295.8	4441.92	306.61	515.154	293.53	497.424	294.21	126.717	312.97	4129.8	305.18	528.533	289.63	97.7173	317.27	4196.14	307.15	526.063	283.57	150.763	315.89	4088.68	304.81	471.791	285.82	106.025
309.54	4957.59	295.82	4434.76	306.64	514.373	293.55	496.662	294.23	126.538	312.99	4122.97	305.2	527.603	289.63	97.6133	317.28	4190.83	307.16	525.363	283.6	150.482	315.9	4081.52	304.83	471.167	285.84	105.893
309.56	4951.07	295.83	4428.81	306.65	513.732	293.56	496.09	294.25	126.383	313	4117.17	305.21	526.873	289.66	97.4938	317.3	4183.38	307.18	524.442	283.62	150.166	315.92	4076.28	304.84	470.392	285.85	105.74
309.57	4942.26	295.84	4420.71	306.68	512.951	293.58	495.177	294.26	126.203	313.01	4110.41	305.22	524.302	289.67	97.3927	317.31	4177.69	307.19	523.692	283.65	149.888	315.93	4069.18	304.86	469.92	285.87	105.609
309.59	4934.84	295.86	4415.26	306.7	512.1	293.59	494.535	294.29	126.047	313.03	4104.4	305.23	524.942	289.69	97.2632	317.32	4170.99	307.22	522.881	283.66	149.568	315.94	4063.45	304.87	469.246	285.89	105.46
309.6	4926.03	295.87	4408.56	306.71	511.669	293.63	493.812	294.3	125.875	313.04	4097.26	305.25	522.952	289.7	97.152	317.34	4165.12	307.23	522.081	283.69	149.292	315.95	4056.34	304.89	468.582	285.91	105.325
309.61	4918.97	295.88	4402.6	306.72	511.198	293.64	493.09	294.33	125.721	313.05	4091.34	305.25	523.522	289.72	97.0325	317.35	4157.99	307.26	521.441	283.71	148.984	315.97	4051.03	304.9	467.827	285.92	105.172
309.63	4909.89	295.89	4395.78	306.74	510.547	293.65	492.367	294.34	125.531	313.06	4084.16	305.28	521.541	289.73	96.9289	317.36	4152.48	307.27	520.81	283.74	148.716	315.98	4044.73	304.92	467.213	285.94	105.044
309.64	4902.67	295.91	4390.25	306.75	509.926	293.66	491.665	294.36	125.386	313.07	4078.45	305.28	522.271	289.75	96.8082	317.38	4145.68	307.28	520	283.76	148.412	316	4039.25	304.94	466.539	285.95	104.906
309.66	4894.13	295.92	4383.39	306.77	509.445	293.68	490.862	294.37	125.2	313.09	4071.79	305.3	520.74	289.75	96.7018	317.39	4139.81	307.3	519.419	283.78	148.146	316.01	4032.41	304.95	466.036	285.97	104.772
309.67	4886.09	295.93	4377.39	306.79	508.854	293.7	490.109	294.4	125.037	313.1	4066.19	305.31	520.09	289.77	96.5751	317.4	4132.83	307.31	518.798	283.81	147.836	316.02	4026.53	304.98	465.513	285.99	104.624
309.69	4876.1	295.94	4370.77	306.8	507.782	293.72	489.657	294.41	124.85	313.11	4059.53	305.33	519.459	289.78	96.4635	317.41	4127.3	307.33	517.427	283.83	147.572	316.03	4019.97	304.99	465.029	286.01	104.496
309.7	4869.38	295.95	4364.73	306.83	507.23	293.73	489.095	294.44	124.694	313.13	4053.86	305.35	518.769	289.8	96.3392	317.42	4120.78	307.33	518.188	283.85	147.269	316.05	4014.87	305.01	464.375	286.02	104.348
309.71	4860.31	295.96	4357.63	306.84	506.078	293.74	488.281	294.45	124.503	313.14	4047.33	305.38	517.998	289.81	96.2551	317.44	4115.07	307.36	516.476	283.88	147.006	316.06	4008.35	305.02	463.882	286.04	104.219
309.73	4853.26	295.98	4351.53	306.87	505.667	293.75	487.619	294.48	124.349	313.16	4041.74	305.4	517.237	289.84	96.1375	317.45	4108.27	307.37	515.545	283.9	146.706	316.07	4002.85	305.03	463.127	286.05	104.073
309.74	4844.29	295.99	4344.37	306.89	504.915	293.76	486.825	294.49	124.169	313.17	4035.11	305.42	516.246	289.84	96.0339	317.46	4103.14	307.38	514.984	283.93	146.439	316.08	3995.28	305.04	462.604	286.07	103.952
309.75	4837.56	296	4338.59	306.91	504.324	293.78	486.112	294.51	124.016	313.18	4029.42	305.44	515.505	289.87	95.9123	317.47	4097.38	307.39	514.303	283.95	146.131	316.09	3990.36	305.06	462.05	286.09	103.808
309.77	4829.36	296.01	4331.93	306.93	503	293.79	485.198	294.52	123.835	313.2	4023.03	305.46	514.734	289.88	95.8087	317.49	4092.41	307.41	513.612	283.97	145.872	316.11	3984	305.06	461.546	286.11	103.686
309.78	4823.14	296.02	4326.39	306.94	502.349	293.81	484.565	294.55	123.685	313.21	4017.31	305.48	514.163	289.9	95.6883	317.5	4085.83	307.43	512.751	284	145.57	316.12	3978.45	305.08	460.832	286.12	103.543
309.8	4815.35	296.03	4319.55	306.97	501.286	293.83	483.682	294.56	123.497	313.22	4010.57	305.5	513.262	289.91	95.5842	317.51	4080.4	307.44	512.19	284.02	145.309	316.13	3972.13	305.07	460.318	286.14	103.413
309.81	4809.05	296.05	4313.46	306.97	501.737	293.85	482.928	294.59	123.341	313.23	4005.05	305.51	512.55	289.93	95.4718	317.53	4074.38	307.46	511.399	284.04	145.014	316.15	3967.25	305.1	459.694	286.15	103.269
309.83	4801.94	296.06	4306.92	306.98	499.24	293.87	482.235	294.6	123.167	313.24	3998.47	305.53	511.659	289.94	95.3729	317.54	4069.11	307.48	510.787	284.07	144.757	316.16	3961.5	305.1	459.17	286.17	103.128
309.84	4795.39	296.07	4301.48	306.99	500.383	293.89	481.441	294.62	123.015	313.26	3992.74	305.54	511.048	289.96	95.2545	317.55	4062.87	307.5	510.066	284.09	144.464	316.17	3956.46	305.14	458.586	286.18	102.984
309.85	4786.69	296.08	4294.1	307	498.046	293.91	480.296	294.64	122.838	313.27	3986.68	305.56	510.417	289.97	95.1564	317.56	4058.03	307.52	509.405	284.11	144.204	316.19	3950.64	305.14	458.062	286.2	102.86
309.87	4780.06	296.1	4288.37	307.01	497.505	293.92	479.592	294.66	122.685	313.28	3981.16	305.57	509.886	289.99	95.0423	317.58	4052.23	307.53	508.483	284.14	143.913	316.2	3945.62	305.16	457.317	286.21	102.714
309.88	4771.86	296.11	4281.24	307.02	497.023	293.95	478.718	294.67	122.499	313.3	3974.94	305.59	509.024	290	94.9398	317.59	4047.5	307.55	507	284.16	143.669	316.21	3938.08	305.17	456.884	286.23	102.59
309.9	4765.32	296.12	4275.04	307.03	496.331	293.96	477.984	294.7	122.351	313.31	3969.54	305.6	508.323	290.02	94.8233	317.61	4036.28	307.55	507.792	284.18	143.38	316.22	3933.04	305.2	456.35	286.24	102.447
309.91	4757.58	296.13	4268.03	307.06	495.699	293.98	476.918	294.71	122.174	313.32	3963.15	305.63	507.621	290.03	94.7308	317.61	4041.46	307.57	506.278	284.21	143.131	316.23	3926.78	305.2	455.786	286.27	102.327
309.93	4750.97	296.15	4262.21	307.07	494.916	293.99	476.376	294.73	122.028	313.34	3957.47	305.64	507.07	290.05	94.6239	317.63	4029.98	307.58	505.386	284.23	142.852	316.24	3921.57	305.23	455.343	286.28	102.172
309.94	4742.48	296.16	4255.46	307.1	494.505	294.03	475.582	294.75	121.831	313.35	3950.66	305.66	506.288	290.06	94.5278	317.64	4025.67	307.6	504.725	284.25	142.616	316.26	3915.18	305.23	454.496	286.3	102.046
309.95	4735.77	296.17	4250.01	307.11	494.073	294.04	475.029	294.77	121.68	313.36	3944.96	305.68	505.747	290.08	94.4153	317.65	4018.92	307.61	503.832	284.27	142.33	316.27	3909.84	305.25	453.62	286.31	101.901
309.97	4727.5	296.18	4243.65	307.15	493.642	294.06	474.938	294.78	121.502	313.37	3938.27	305.69	504.985	290.09	94.3223	317.66	4013.14	307.63	503.161	284.3	142.079	316.28	3903.11	305.27	452.904	286.33	101.78
309.98	4721.32	296.19	4238.22	307.16	492.889	294.07	474.435	294.8	121.36	313.39	3932.8	305.7	504.434	290.11	94.2078	317.68	4000.86	307.65	502.399	284.32	141.806	316.29	3898.89	305.29	452.168	286.34	101.638
310	4713.23	296.2	4231.77	307.2	491.996	294.1	473.852	294.82	121.173	313.4	3926.38	305.73	503.071	290.12	94.1108	317.68	4006.24	307.67	501.888	284.34	141.557	316.31	3892.74	305.3	451.624	286.36	101.511
310.01	4707.3	296.21	4226.42	307.21	491.353	294.09	473.239	294.84	121.029	313.41	3920.99	305.73	503.682	290.14	93.9928	317.7	3994.66	307.69	501.246	284.36	141.276	316.32	3887.16	305.32	450.959	286.38	101.366
310.03	4699.82	296.23	4219.73	307.23	490.42	294.12	472.484	294.85	120.854	313.42	3914.46	305.75	502.309	290.15	93.8898	317.71	3989.64	307.71	500.714	284.39	141.032	316.33	3882.53	305.33	450.425	286.4	101.248
310.04	4694.05	296.24	4214.12	307.24	489.838	294.12	471.67	294.87	120.707	313.44	3908.94	305.76	501.737	290.16	93.7693	317.72	3983.31	307.73	500.002	284.41	140.758	316.35	3877.45	305.35	449.447	286.41	101.111
310.05	4686.15	296.25	4207.63	307.27	488.894	294.13	470.875	294.89	120.529	313.45	3902.41	305.79	501.035	290.18	93.6707	317.73	3978.11	307.74	499.481	284.43	140.51	316.36	3871.02	305.37	449.276	286.43	100.994
310.07	4680.11	296.26	4201.73	307.28	488.281	294.14	470.282	294.91	120.38	313.46	3897.46	305.8	500.393	290.19	93.5773	317.75	3971.77	307.77	498.628	284.46	140.231	316.37	3865.83	305.37	448.964	286.45	100.859
310.08	4673.12	296.28	4195.21	307.29	487.378	294.16	469.105	294.93	120.208	313.47	3890.81	305.82	499.561	290.2	93.4811	317.76	3966.06	307.78	497.916	284.48	139.992	316.38	3859.92	305.39	448.601	286.46	100.741
310.09	4667.57	296.29	4189.55	307.3	486.765	294.18	468.411	294.94	120.058	313.49	3885.37	305.84	498.036	290.22	93.373	317.77	3959.52	307.8	497.214	284.5	139.717	316.4	3855.28	305.38	448.278	286.47	100.611
310.11	4661.06	296.3	4183.15	307.31	486.193	294.2	467.515	294.97	119.882	313.5	3878.92	305.84	498.809	290.23	93.2776	317.78	3954.08	307.82	496.572	284.52	139.473	316.41	3849.47	305.41	447.582	286.49	100.507
310.12	4655.25	296.31	4177.68	307.33	485.66	294.23	466.77	294.98	119.738	313.51	3873.37	305.86	497.525	290.25	93.1646	317.8	3948.67	307.84	496.291	284.55	139.203	316.42	3844.06	305.41	446.937	286.51	100.376
310.14	4648.47	296.32	4170.87	307.34	485.168	294.25	466.066	295	119.569	313.53	3866.78	305.88	496.802	290.26	93.0716	317.81	3944.03	307.85	495.679	284.57	138.969	316.44	3834.15	305.43	446.594	286.52	100.261
310.15	4643.17	296.33	4165.28	307.35	484.586	294.27	465.663	295.01	119.419	313.54	3861.71	305.89	496.13	290.28	92.9766	317.82	3937.55	307.86	495.097	284.59	138.692	316.44	3838.59	305.43	445.969	286.54	100.124
310.16	4636.51	296.35	4153.5	307.37	483.973	294.29	464.818	295.03	119.235	313.55	3856.08	305.91	494.776	290.29	92.8863	317.83	3932.24	307.87	494.485	284.61	138.452	316.46	3828.8	305.45	445.535	286.55	100.009
310.18	4631.38	296.35	4158.93	307.38	483.4	294.31	464.134	295.05	119.091	313.57	3850.99	305.91	495.398	290.31	92.7793	317.85	3925.94	307.89	493.953	284.64	138.18	316.47	3824.04	305.46	444.95	286.57	99.8769
310.19	4625.14	296.37	4147.22	307.41	482.938	294.33	463.318	295.07	118.929	313.58	3845.06	305.93	493.411	290.32	92.6879	317.86	3920.61	307.9	493.461	284.66	137.947	316.48	3818.01	305.48	444.547	286.58	99.7631
310.2	4620.79	296.38	4141.75	307.43	482.386	294.33	462.795	295.08	118.77	313.59	3839.8	305.94	493.953	290.34	92.5897	317.87	3915.25	307.92	492.839	284.68	137.673	316.5	3807.28	305.5	443.781	286.6	99.6048
310.22	4614.55	296.39	4135.26	307.45	481.903	294.35	462.1	295.11	118.607	313.6	3833.56	305.97	492.337	290.36	92.4975	317.89	3910.32	307.93	492.277	284.71	137.435	316.5	3813.24	305.52	443.438	286.62	99.4847
310.23	4610	296.4	4130.25	307.47	481.411	294.36	461.637	295.12	118.469	313.62	3828.14	305.97	493.05	290.37	92.394	317.9	3904.82	307.94	490.982	284.73	137.169	316.52	3801.95	305.55	442.711	286.64	99.3458
310.24	4604.75	296.42	4123.43	307.49	480.748	294.37	460.842	295.14	118.309	313.63	3821.94	305.99	491.554	290.38	92.3033	317.91	3899.84	307.95	490.37	284.75	136.934	316.53	3795.64	305.57	442.086	286.65	99.2224
310.26	4599.51	296.43	4118.2	307.5	480.306	294.38	460.016	295.15	118.17	313.64	3817.26	306	491.012	290.4	92.2079	317.93	3893.71	307.97	489.557	284.77	136.664	316.55	3790.45	305.59	441.591	286.67	99.0819
310.27	4593.78	296.44	4111.84	307.51	479.522	294.4	459.231	295.17	118.015	313.65	3810.86	306.03	490.39	290.41	92.0941	317.94	3888.74	307.99	488.904	284.79	136.433	316.56	3784.53	305.6	441.107	286.68	98.9601
310.29	4588.51	296.45	4106.69	307.52	478.999	294.41	458.798	295.19	117.88	313.67	3805.95	306.04	489.858	290.43	91.9838	317.95	3882.81	308.01	488.091	284.81	136.175	316.57	3779.81	305.63	440.411	286.7	98.8161
310.3	4582.18	296.46	4100.67	307.54	478.245	294.43	458.103	295.21	117.712	313.68	3800.18	306.05	489.356	290.44	91.8876	317.96	3877.53	308.02	487.498	284.84	135.955	316.58	3774.13	305.63	439.897	286.71	98.6919
310.31	4577.48	296.47	4095.48	307.55	477.743	294.43	457.448	295.23	117.573	313.69	3794.97	306.07	488.834	290.45	91.7837	317.98	3870.84	308.03	486.665	284.86	135.69	316.59	3769.32	305.65	439.18	286.73	98.551
310.32	4569.79	296.48	4089.1	307.58	476.738	294.46	456.632	295.24	117.4	313.7	3788.43	306.09	487.91	290.47	91.6918	317.99	3865.51	308.05	486.022	284.88	135.457	316.6	3763.75	305.64	438.625	286.75	98.4244
310.34	4562.47	296.49	4083.85	307.59	476.124	294.47	456.038	295.26	117.258	313.71	3783.59	306.1	487.458	290.48	91.5947	318	3859.62	308.07	485.389	284.9	135.186	316.62	3759.04	305.67	438.08	286.76	98.281
310.35	4553.96	296.51	4077.79	307.62	475.169	294.5	455.363	295.28	117.101	313.73	3777.91	306.11	486.785	290.5	91.5048	318.01	3854.59	308.1	484.857	284.92	134.962	316.63	3753.67	305.65	437.515	286.78	98.164
310.37	4546.88	296.52	4072.42	307.63	475.803	294.51	454.819	295.3	116.967	313.74	3772.72	306.12	486.173	290.51	91.3973	318.03	3848.18	308.11	484.174	284.95	134.711	316.64	3748.82	305.68	436.879	286.8	98.029
310.37	4538.69	296.53	4066.1	307.65	473.983	294.52	453.932	295.31	116.804	313.75	3767.11	306.13	485.299	290.52	91.305	318.04	3843.22	308.12	483.581	284.96	134.5	316.65	3743.03	305.68	436.294	286.81	97.9115
310.39	4533.2	296.55	4061.06	307.66	474.576	294.53	453.106	295.33	116.668	313.76	3762.04	306.16	484.726	290.54	91.2011	318.05	3837.85	308.13	482.747	284.99	134.244	316.66	3738.38	305.71	435.587	286.83	97.7733
310.4	4526.11	296.56	4056.47	307.67	472.685	294.56	452.058	295.35	116.504	313.78	3755.44	306.17	483.983	290.55	91.1124	318.06	3832.76	308.14	482.074	285.01	134.025	316.67	3733.19	305.72	434.981	286.84	97.663
310.42	4520.18	296.57	4051.52	307.67	473.229	294.56	451.272	295.37	116.368	313.79	3750.43	306.2	483.35	290.57	91.0241	318.08	3826.49	308.17	481.351	285.03	133.776	316.68	3728.72	305.74	434.234	286.86	97.5367
310.43	4513.15	296.58	4046.18	307.69	472.082	294.6	450.314	295.39	116.218	313.8	3744.37	306.21	482.496	290.58	90.931	318.09	3821	308.18	480.758	285.05	133.552	316.69	3723.16	305.75	433.75	286.88	97.4236
310.44	4507.38	296.59	4041.58	307.7	471.609	294.6	449.689	295.4	116.081	313.81	3739.34	306.23	482.185	290.59	90.8303	318.1	3815.03	308.2	479.411	285.07	133.297	316.71	3718.62	305.76	433.073	286.89	97.2898
310.45	4500.47	296.6	4035.84	307.71	470.322	294.62	448.873	295.42	115.919	313.83	3733.36	306.24	481.461	290.61	90.7363	318.11	3810.78	308.21	480.044	285.09	133.082	316.72	3713.12	305.79	432.609	286.9	97.1679
310.47	4494.7	296.61	4031.09	307.73	469.638	294.63	448.248	295.44	115.78	313.84	3728.41	306.26	480.889	290.62	90.6436	318.12	3805.45	308.23	478.708	285.12	132.824	316.74	3703.8	305.79	432.175	286.92	97.0416
310.48	4487.87	296.62	4025.49	307.76	468.642	294.65	447.633	295.45	115.627	313.85	3722.68	306.29	480.215	290.64	90.5493	318.13	3799.86	308.24	478.195	285.14	132.596	316.74	3709.34	305.81	431.569	286.94	96.9352
310.49	4482.71	296.63	4020.85	307.78	468.028	294.67	447.159	295.47	115.492	313.86	3717.97	306.3	479.502	290.65	90.4477	318.15	3795.3	308.26	477.502	285.16	132.352	316.76	3698.71	305.82	431.074	286.95	96.8281
310.5	4475.6	296.64	4015.16	307.81	467.203	294.68	446.856	295.49	115.336	313.88	3712.69	306.32	478.658	290.67	90.3542	318.16	3790.87	308.27	476.939	285.18	132.143	316.77	3692.65	305.83	430.68	286.97	96.7169
310.52	4469.67	296.66	4010.62	307.82	466.68	294.71	446.453	295.51	115.2	313.89	3707.97	306.33	478.004	290.69	90.2519	318.17	3785.54	308.28	476.255	285.21	131.9	316.79	3687.37	305.85	430.337	286.98	96.5918
310.53	4462.26	296.67	4004.86	307.84	465.935	294.7	445.969	295.53	115.066	313.91	3702.56	306.34	477.863	290.7	90.1595	318.18	3781.16	308.3	475.722	285.22	131.684	316.8	3681.96	305.85	429.923	286.99	96.4866
310.54	4456.42	296.68	4000.22	307.85	465.482	294.73	445.414	295.54	114.933	313.92	3697.82	306.35	477.049	290.71	90.0651	318.2	3775.66	308.31	475.008	285.25	131.437	316.81	3677.7	305.87	429.529	287.01	96.3662
310.55	4449.33	296.69	3995.1	307.88	464.526	294.74	444.678	295.56	114.777	313.93	3692.53	306.37	476.315	290.73	89.9788	318.21	3770.67	308.34	474.355	285.26	131.228	316.82	3671.69	305.87	429.044	287.02	96.2575
310.57	4443.29	296.7	3990.61	307.88	464.707	294.76	444.113	295.58	114.648	313.94	3688.04	306.38	475.742	290.74	89.8896	318.22	3764.74	308.36	473.54	285.29	130.986	316.83	3667.3	305.91	428.276	287.04	96.1339
310.58	4435.9	296.71	3985.16	307.9	463.902	294.78	443.407	295.6	114.508	313.96	3682.65	306.39	475.079	290.76	89.8012	318.23	3759.79	308.37	472.987	285.31	130.785	316.84	3661.9	305.91	427.943	287.05	96.0287
310.6	4430.34	296.72	3980.53	307.91	463.389	294.79	442.782	295.61	114.381	313.97	3677.47	306.4	473.772	290.77	89.6905	318.25	3754.05	308.39	472.404	285.33	130.54	316.86	3651.45	305.94	427.377	287.07	95.9051
310.61	4422.91	296.74	3975.19	307.94	462.543	294.81	442.005	295.63	114.237	313.98	3673.32	306.4	474.566	290.79	89.6033	318.26	3749.36	308.4	471.992	285.35	130.329	316.86	3657.07	305.94	426.892	287.09	95.7971
310.62	4417.17	296.75	3971.21	307.95	461.748	294.82	441.4	295.64	114.11	313.99	3668.86	306.42	473.329	290.8	89.4957	318.27	3743.16	308.42	471.207	285.37	130.095	316.88	3646.64	305.96	426.407	287.1	95.6727
310.63	4409.84	296.76	3965.47	307.97	460.801	294.84	440.724	295.66	113.962	314	3663.65	306.43	472.233	290.82	89.4045	318.29	3737.89	308.43	470.624	285.39	129.894	316.89	3641.23	305.96	425.851	287.12	95.5599
310.65	4404.34	296.77	3960.79	307.99	459.814	294.86	440.23	295.68	113.834	314.01	3659.1	306.45	471.167	290.83	89.2977	318.3	3731.7	308.44	469.588	285.41	129.658	316.9	3636.57	306	425.417	287.13	95.439
310.66	4397.24	296.78	3955.39	308.01	458.767	294.87	439.816	295.7	113.682	314.02	3653.59	306.45	471.64	290.85	89.2069	318.31	3726.53	308.44	470.02	285.43	129.452	316.91	3631.07	305.99	424.922	287.15	95.3322
310.68	4391.32	296.79	3950.35	308.03	457.71	294.89	439.422	295.71	113.562	314.03	3649.24	306.47	470.644	290.86	89.0937	318.32	3721.39	308.46	468.491	285.46	129.219	316.92	3625.76	306.02	424.396	287.16	95.2046
310.69	4383.61	296.8	3944.96	308.05	456.833	294.89	438.817	295.73	113.41	314.05	3638.93	306.48	469.99	290.87	89.0053	318.33	3717.07	308.46	469.095	285.48	129.021	316.93	3619.77	306.01	423.82	287.17	95.0913
310.7	4377.69	296.81	3940.26	308.06	456.028	294.92	438.353	295.75	113.298	314.05	3643.59	306.5	469.558	290.88	88.9028	318.34	3712.39	308.48	467.797	285.5	128.782	316.95	3614.82	306.03	423.214	287.19	94.9641
310.71	4369.97	296.82	3934.74	308.07	455.766	294.92	437.666	295.77	113.149	314.07	3634.45	306.52	469.205	290.9	88.8108	318.36	3701.78	308.49	467.233	285.52	128.572	316.96	3609.28	306.03	422.668	287.2	94.8512
310.72	4363.55	296.83	3929.96	308.08	455.605	294.94	437.212	295.78	113.026	314.08	3630.03	306.54	468.692	290.91	88.7004	318.36	3707.85	308.51	466.318	285.54	128.337	316.97	3604.68	306.05	421.971	287.22	94.736
310.74	4356.03	296.84	3924.37	308.08	455.322	294.95	436.718	295.8	112.88	314.09	3625.03	306.56	468.189	290.93	88.6096	318.38	3691.66	308.51	466.75	285.56	128.133	316.98	3599.56	306.07	421.394	287.23	94.6319
310.75	4350.49	296.86	3919.73	308.09	455.302	294.97	436.162	295.82	112.755	314.1	3620.77	306.59	467.686	290.94	88.5043	318.38	3697.31	308.54	465.513	285.59	127.894	316.99	3595.35	306.08	420.464	287.25	94.517
310.76	4342.93	296.87	3914.55	308.1	455.071	294.98	435.405	295.84	112.608	314.11	3615.72	306.6	466.781	290.95	88.4183	318.4	3687.26	308.54	465.623	285.6	127.695	317	3590.26	306.09	420.242	287.26	94.4216
310.77	4337.09	296.88	3910.05	308.12	454.859	295.01	434.81	295.86	112.478	314.12	3610.85	306.62	466.167	290.96	88.3067	318.41	3682.2	308.58	464.647	285.63	127.467	317.01	3585.79	306.11	419.716	287.28	94.3099
310.79	4329.39	296.89	3905.03	308.13	454.214	295.01	434.265	295.87	112.334	314.13	3605.94	306.64	465.573	290.98	88.219	318.42	3677.9	308.58	464.889	285.64	127.27	317.02	3581.05	306.12	419.342	287.29	94.213
310.79	4324.59	296.9	3900.61	308.15	453.801	295.04	433.81	295.89	112.208	314.14	3601.41	306.65	464.979	290.99	88.1125	318.43	3672.81	308.6	463.409	285.67	127.042	317.04	3576.96	306.14	418.786	287.31	94.1157
310.81	4317.35	296.91	3895.26	308.17	452.702	295.04	433.114	295.91	112.071	314.16	3596.03	306.66	464.113	291.01	88.0241	318.44	3668.47	308.62	464.063	285.68	126.839	317.05	3572.17	306.15	418.321	287.32	94.0199
310.82	4310.4	296.92	3890.46	308.2	452.219	295.07	432.619	295.92	111.947	314.17	3591.97	306.67	462.674	291.02	87.9436	318.45	3663.22	308.63	462.15	285.7	126.61	317.06	3567.97	306.17	417.694	287.34	93.8136
310.84	4303.06	296.94	3880.55	308.22	450.717	295.07	432.033	295.94	111.811	314.18	3587.32	306.67	463.51	291.04	87.8572	318.47	3658.9	308.64	462.684	285.72	126.413	317.07	3563.19	306.18	417.33	287.34	93.909
310.85	4298.5	296.94	3885.03	308.23	450.072	295.09	431.68	295.95	111.692	314.19	3583.1	306.69	462.161	291.05	87.7487	318.48	3653.72	308.67	460.539	285.75	126.189	317.08	3559.42	306.2	416.723	287.37	93.6124
310.87	4292.59	296.96	3875.4	308.25	449.548	295.09	431.003	295.97	111.569	314.2	3577.84	306.7	461.506	291.07	87.6598	318.49	3650.05	308.67	461.425	285.76	125.991	317.1	3554.76	306.21	416.005	287.38	93.705
310.87	4288.29	296.97	3871.38	308.26	448.873	295.12	430.498	295.99	111.448	314.22	3573.79	306.72	460.993	291.08	87.5581	318.5	3645.16	308.69	459.059	285.79	125.764	317.11	3550.96	306.23	415.317	287.4	93.4013
310.89	4282.85	296.98	3866.44	308.29	448.278	295.12	429.791	296.01	111.321	314.23	3568.92	306.74	460.016	291.09	87.4696	318.52	3635.61	308.69	459.895	285.81	125.561	317.12	3546.43	306.24	414.852	287.4	93.4987
310.9	4277.56	296.99	3861.9	308.3	447.754	295.13	429.215	296.02	111.202	314.24	3565.1	306.76	459.402	291.11	87.3691	318.52	3641.01	308.71	458.566	285.83	125.335	317.13	3542.66	306.26	414.255	287.43	93.1865
310.91	4270.9	297	3855.28	308.32	446.382	295.14	428.781	296.04	111.072	314.25	3560.42	306.78	458.536	291.12	87.2811	318.54	3631.44	308.72	458.193	285.85	125.14	317.15	3537.99	306.27	413.921	287.44	93.2895
310.92	4265.69	297.01	3850.64	308.32	447.128	295.15	428.266	296.05	110.956	314.26	3556.51	306.8	457.972	291.14	87.1677	318.55	3626.53	308.73	457.529	285.87	124.915	317.16	3534.09	306.29	413.425	287.45	92.9677
310.94	4258.22	297.02	3845.17	308.34	445.908	295.17	427.387	296.07	110.813	314.27	3551.82	306.83	457.337	291.15	87.0824	318.56	3622.57	308.75	456.874	285.89	124.73	317.17	3529.75	306.3	413.041	287.47	93.0675
310.95	4252.8	297.03	3840.61	308.35	445.616	295.19	426.74	296.08	110.695	314.29	3543.29	306.84	456.793	291.16	86.9771	318.57	3617.46	308.77	456.229	285.91	124.507	317.18	3526.04	306.32	412.677	287.49	92.7657
310.97	4245.99	297.04	3835.72	308.38	445.243	295.21	426.164	296.1	110.562	314.29	3547.9	306.86	456.31	291.18	86.8926	318.59	3612.78	308.79	455.615	285.93	124.311	317.19	3522.04	306.32	412.312	287.5	92.8591
310.97	4240.68	297.06	3827.09	308.39	444.729	295.23	425.619	296.11	110.447	314.31	3539.37	306.87	455.907	291.19	86.7797	318.6	3607.52	308.8	454.798	285.95	124.113	317.2	3518.1	306.33	411.908	287.51	92.5477
310.99	4233.44	297.06	3831.74	308.4	444.507	295.26	425.053	296.13	110.308	314.32	3534.69	306.88	455.312	291.2	86.6976	318.61	3603.24	308.82	454.295	285.97	123.924	317.21	3513.89	306.33	411.523	287.53	92.6523
311	4227.53	297.08	3817.62	308.41	444.002	295.28	424.578	296.15	110.188	314.33	3530.82	306.88	455.866	291.22	86.6135	318.62	3596.99	308.85	453.378	285.99	123.707	317.22	3510.66	306.35	410.987	287.55	92.3205
311.02	4220.4	297.08	3822.75	308.43	443.296	295.3	423.8	296.17	110.053	314.34	3525.86	306.9	454.002	291.23	86.5286	318.64	3587.75	308.86	452.723	286.01	123.518	317.23	3506.41	306.36	410.491	287.56	92.4175
311.02	4215.39	297.1	3807.45	308.45	442.822	295.32	423.274	296.18	109.938	314.35	3522.01	306.9	454.577	291.24	86.4404	318.64	3592.8	308.89	451.493	286.03	123.301	317.24	3502.72	306.38	409.975	287.58	92.11
311.04	4208.84	297.1	3812.84	308.46	442.449	295.33	422.83	296.2	109.796	314.36	3517.43	306.91	453.267	291.26	86.3712	318.66	3583.46	308.89	451.967	286.05	123.122	317.25	3498.16	306.38	409.631	287.59	92.2074
311.05	4203.57	297.11	3802.9	308.47	440.683	295.34	422.243	296.22	109.674	314.37	3513.56	306.92	452.632	291.27	86.2746	318.67	3578.54	308.91	450.365	286.07	122.911	317.26	3494.58	306.4	409.216	287.61	91.8859
311.06	4196.9	297.12	3797.31	308.47	441.864	295.35	421.455	296.23	109.564	314.38	3509.08	306.93	451.755	291.28	86.1897	318.68	3574.93	308.92	450.858	286.09	122.726	317.28	3489.09	306.4	408.821	287.62	91.9878
311.07	4191.93	297.14	3787.63	308.5	440.098	295.36	420.939	296.25	109.445	314.4	3505.22	306.94	451.151	291.3	86.0948	318.69	3570.6	308.93	449.226	286.12	122.512	317.29	3485.22	306.42	408.416	287.64	91.6666
311.09	4186.1	297.14	3792.84	308.51	439.099	295.36	420.333	296.26	109.318	314.41	3500.83	306.95	450.113	291.31	86.0158	318.7	3567.07	308.94	449.75	286.13	122.323	317.3	3481.09	306.43	408.022	287.65	91.7696
311.1	4181.47	297.15	3783.27	308.54	438.504	295.37	419.797	296.28	109.197	314.42	3497.14	306.98	449.73	291.33	85.9225	318.71	3563.2	308.96	448.217	286.16	122.114	317.31	3478.01	306.45	407.536	287.67	91.472
311.11	4175.5	297.16	3778.02	308.54	438.665	295.38	419.271	296.29	109.056	314.43	3491.72	307	449.306	291.34	85.8404	318.73	3556.54	308.96	448.691	286.17	121.929	317.32	3474.18	306.46	407.161	287.68	91.5735
311.12	4170.63	297.18	3768.2	308.55	438.07	295.4	418.786	296.31	108.94	314.44	3488.21	307.02	448.792	291.36	85.7606	318.73	3560.08	308.99	447.733	286.19	121.707	317.34	3470.95	306.48	406.655	287.7	91.2538
311.14	4164.7	297.18	3773.11	308.57	437.01	295.41	418.341	296.33	108.8	314.45	3484.62	307.04	448.086	291.37	85.6845	318.75	3552.92	309	447.239	286.21	121.517	317.35	3466.84	306.49	406.108	287.71	91.3537
311.14	4159.89	297.2	3763.93	308.59	436.284	295.43	417.886	296.34	108.68	314.47	3481.02	307.06	447.673	291.38	85.6128	318.76	3548.33	309.02	446.644	286.24	121.301	317.36	3463.36	306.51	405.48	287.73	91.0409
311.16	4154.1	297.21	3758.9	308.6	435.466	295.44	417.37	296.36	108.546	314.48	3476.66	307.07	447.169	291.39	85.5338	318.77	3544.41	309.03	446.08	286.25	121.119	317.37	3458.71	306.52	405.106	287.74	91.1387
311.16	4149.45	297.22	3754.5	308.62	434.022	295.46	416.945	296.37	108.429	314.49	3472.82	307.09	446.221	291.41	85.4416	318.78	3539.5	309.04	445.566	286.27	120.915	317.38	3455.73	306.54	404.417	287.76	90.845
311.18	4144.16	297.23	3748.94	308.62	434.85	295.49	416.42	296.39	108.298	314.5	3468.49	307.09	446.725	291.42	85.3575	318.79	3535.88	309.06	444.598	286.29	120.73	317.39	3451.94	306.55	403.921	287.77	90.9349
311.19	4139.75	297.24	3744.67	308.65	433.285	295.5	416.076	296.4	108.171	314.52	3459.91	307.11	445.707	291.43	85.2657	318.8	3531.06	309.06	445.132	286.31	120.523	317.41	3448.91	306.56	403.384	287.79	90.6487
311.21	4134.62	297.25	3739.42	308.66	432.306	295.54	415.62	296.42	108.039	314.52	3465.11	307.12	445.223	291.45	85.1875	318.82	3527.75	309.09	443.528	286.33	120.351	317.42	3444.76	306.57	402.969	287.79	90.7355
311.21	4130.03	297.26	3734.99	308.68	431.67	295.54	415.105	296.44	107.922	314.54	3451.81	307.14	444.91	291.46	85.0953	318.83	3523.25	309.09	444.184	286.35	120.149	317.43	3441.34	306.58	402.422	287.82	90.4353
311.23	4124.48	297.27	3729.84	308.69	430.832	295.57	414.346	296.45	107.783	314.54	3456.16	307.15	444.527	291.48	85.0208	318.84	3519.61	309.11	442.56	286.37	119.975	317.44	3438.44	306.6	402.058	287.82	90.5356
311.24	4119.83	297.29	3725.24	308.7	430.165	295.57	413.86	296.47	107.661	314.56	3448.69	307.17	444.103	291.49	84.9406	318.85	3515.16	309.12	443.084	286.39	119.772	317.45	3435.18	306.61	401.673	287.85	90.2126
311.26	4114.57	297.3	3719.84	308.73	429.428	295.59	413.324	296.49	107.527	314.57	3444.22	307.18	443.649	291.51	84.862	318.86	3511.79	309.15	441.662	286.41	119.594	317.46	3431.41	306.62	401.166	287.85	90.3145
311.27	4110.56	297.31	3715.47	308.74	428.751	295.6	412.737	296.5	107.414	314.58	3440.84	307.2	443.195	291.52	84.7766	318.87	3507.58	309.15	442.126	286.43	119.391	317.47	3428.61	306.64	400.68	287.88	89.9911
311.28	4105.69	297.32	3710.34	308.76	426.993	295.61	411.928	296.52	107.277	314.59	3436.69	307.21	442.631	291.53	84.7064	318.88	3504.03	309.18	440.462	286.45	119.214	317.48	3424.76	306.66	400.417	287.88	90.0926
311.29	4100.56	297.33	3705.91	308.76	427.801	295.63	411.331	296.53	107.161	314.6	3433.22	307.22	442.217	291.55	84.6242	318.89	3499.56	309.18	441.127	286.47	119.008	317.49	3421.74	306.68	400.153	287.9	89.7555
311.31	4095.29	297.34	3700.83	308.79	424.952	295.63	410.602	296.55	107.022	314.62	3429.11	307.23	441.692	291.56	84.5489	318.9	3495.89	309.2	439.513	286.49	118.839	317.5	3417.66	306.7	399.728	287.9	89.8567
311.31	4091.36	297.35	3696.95	308.79	425.77	295.65	410.177	296.57	106.908	314.63	3425.48	307.25	441.349	291.58	84.4382	318.91	3491.83	309.2	439.917	286.51	118.642	317.51	3414.5	306.71	399.221	287.93	89.6424
311.33	4086.54	297.36	3692.4	308.81	423.86	295.66	409.671	296.59	106.777	314.64	3421.18	307.26	440.845	291.59	84.3732	318.93	3488.7	309.22	439.089	286.53	118.475	317.52	3410.37	306.73	398.735	287.94	89.5424
311.34	4082.21	297.37	3688.01	308.82	423.123	295.67	409.226	296.6	106.663	314.65	3417.64	307.28	440.371	291.6	84.2882	318.94	3485.18	309.24	438.464	286.55	118.284	317.53	3407.71	306.74	398.097	287.96	89.424
311.35	4076.66	297.38	3682.86	308.84	421.324	295.69	408.588	296.62	106.516	314.66	3413.45	307.3	439.745	291.61	84.214	318.95	3481.13	309.26	438.05	286.57	118.117	317.54	3403.63	306.75	397.742	287.97	89.3208
311.36	4072	297.39	3678.56	308.84	422.092	295.7	408.092	296.63	106.402	314.67	3409.77	307.31	439.261	291.63	84.1342	318.96	3477	309.27	437.475	286.59	117.923	317.56	3396.22	306.76	397.387	287.99	89.2032
311.38	4065.34	297.4	3673.68	308.88	421.041	295.72	407.576	296.65	106.252	314.68	3405.51	307.32	438.696	291.64	84.056	318.97	3473.43	309.28	437.081	286.6	117.746	317.56	3400.21	306.77	396.86	288	89.1048
311.39	4061.11	297.41	3669.54	308.88	421.223	295.72	407.131	296.66	106.14	314.69	3402.33	307.34	438.242	291.65	83.965	318.98	3469.12	309.3	436.486	286.63	117.55	317.58	3393.12	306.77	396.232	288.02	88.9988
311.4	4055.88	297.42	3664.59	308.89	424.061	295.74	406.533	296.68	106.008	314.7	3398.41	307.35	437	291.66	83.8872	318.99	3465.59	309.31	435.981	286.64	117.383	317.59	3389.06	306.78	395.776	288.03	88.8992
311.41	4051.96	297.43	3660.5	308.91	424.586	295.74	406.118	296.69	105.896	314.71	3394.8	307.35	437.656	291.68	83.7921	319	3461.19	309.33	434.83	286.66	117.194	317.6	3385.69	306.79	395.249	288.05	88.8032
311.43	4047.11	297.44	3655.88	308.94	426.041	295.76	405.561	296.72	105.767	314.72	3390.71	307.36	435.88	291.69	83.7219	319.01	3457.67	309.33	435.294	286.68	117.017	317.61	3381.63	306.81	394.935	288.06	88.7039
311.43	4042.91	297.45	3652.06	308.94	425.799	295.77	405.136	296.73	105.659	314.73	3387.26	307.36	436.385	291.71	83.6412	319.02	3453.74	309.35	433.8	286.7	116.824	317.62	3378.19	306.82	394.57	288.08	88.5907
311.45	4037.35	297.46	3647.72	308.96	426.325	295.78	404.691	296.75	105.534	314.75	3379.92	307.37	435.375	291.72	83.569	319.04	3450.56	309.35	434.335	286.72	116.658	317.63	3373.5	306.84	394.296	288.09	88.4951
311.45	4033.12	297.47	3643.52	308.98	426.173	295.79	404.377	296.76	105.424	314.75	3383.36	307.38	434.931	291.73	83.4831	319.05	3446.75	309.37	432.619	286.74	116.451	317.65	3365.27	306.85	393.729	288.1	88.3846
311.47	4027.78	297.48	3638.29	308.98	426.557	295.8	404.002	296.78	105.295	314.77	3372.76	307.4	434.335	291.75	83.4069	319.06	3443.59	309.37	433.164	286.76	116.286	317.65	3369.56	306.86	393.333	288.12	88.2886
311.48	4023.93	297.49	3634.05	309	426.001	295.81	403.881	296.79	105.191	314.77	3376.12	307.41	433.851	291.76	83.311	319.07	3439.85	309.39	432.023	286.78	116.089	317.67	3361.64	306.88	392.857	288.13	88.1777
311.5	4019.07	297.5	3629.17	309.02	422.475	295.83	403.405	296.81	105.067	314.79	3369.3	307.43	433.265	291.77	83.2412	319.08	3436.68	309.4	431.579	286.79	115.924	317.68	3357.39	306.88	392.553	288.15	88.0809
311.51	4014.67	297.51	3625.44	309.03	420.242	295.85	402.858	296.82	104.959	314.8	3365.81	307.44	432.791	291.79	83.1393	319.09	3432.9	309.42	431.044	286.82	115.736	317.69	3349.81	306.89	392.106	288.16	87.9684
311.52	4009.31	297.53	3617.35	309.04	421.535	295.87	402.047	296.84	104.835	314.81	3361.69	307.47	432.114	291.8	83.0506	319.1	3429.74	309.44	430.014	286.84	115.567	317.69	3354.11	306.9	391.721	288.18	87.8667
311.53	4004.96	297.53	3621.07	309.07	420.131	295.89	401.44	296.85	104.733	314.82	3358.45	307.49	431.75	291.81	82.9515	319.11	3425.97	309.44	430.518	286.85	115.376	317.71	3342.16	306.92	391.214	288.19	87.7542
311.55	3999.2	297.55	3609.98	309.07	419.797	295.91	400.761	296.87	104.583	314.83	3354.36	307.52	431.377	291.83	82.8745	319.13	3422.75	309.47	429.155	286.87	115.212	317.71	3346.1	306.92	390.657	288.21	87.6622
311.56	3994.88	297.55	3613.69	309.09	419.908	295.93	400.315	296.88	104.477	314.84	3351.07	307.53	430.842	291.84	82.7794	319.14	3418.71	309.47	429.65	286.89	115.022	317.73	3335.04	306.95	390.16	288.22	87.5569
311.57	3989.08	297.57	3601.38	309.11	419.767	295.95	399.738	296.9	104.339	314.85	3346.82	307.56	430.236	291.86	82.7019	319.15	3415.42	309.49	428.781	286.91	114.852	317.73	3339.04	306.96	389.825	288.24	87.4608
311.58	3984.82	297.57	3605.21	309.12	419.494	295.96	398.958	296.91	104.236	314.86	3343.47	307.58	429.872	291.87	82.6204	319.16	3410.94	309.5	428.296	286.93	114.667	317.75	3327.84	306.98	389.44	288.25	87.3275
311.6	3979.02	297.59	3592.92	309.13	419.17	295.99	398.35	296.94	104.117	314.87	3339.47	307.59	429.256	291.88	82.5426	319.17	3407.11	309.51	427.832	286.95	114.509	317.75	3331.94	306.99	389.024	288.26	87.2318
311.61	3974.54	297.59	3596.9	309.15	418.877	295.99	397.965	296.95	104.007	314.88	3335.93	307.61	428.529	291.9	82.4414	319.19	3402.55	309.52	427.246	286.96	114.335	317.77	3324.36	307.02	388.659	288.28	87.116
311.62	3968.92	297.61	3584.55	309.17	418.219	296.02	397.519	296.97	103.886	314.89	3331.68	307.61	428.872	291.91	82.3648	319.2	3399.04	309.53	426.771	286.98	114.176	317.78	3320.11	307.02	388.334	288.29	87.0151
311.63	3964.22	297.61	3588.27	309.18	417.795	296.02	397.205	296.98	103.779	314.9	3328.38	307.63	427.347	291.92	82.258	319.21	3395.08	309.56	425.366	287	113.995	317.79	3316.88	307.04	387.848	288.31	86.8986
311.65	3957.91	297.63	3580.34	309.19	416.339	296.04	396.81	297	103.651	314.91	3324.37	307.63	428.064	291.94	82.1845	319.22	3392.42	309.56	425.942	287.02	113.836	317.8	3313.26	307.04	387.533	288.32	86.7988
311.66	3953.11	297.64	3577.09	309.21	414.882	296.04	396.384	297.01	103.546	314.92	3321.07	307.64	426.781	291.95	82.1082	319.23	3388.12	309.59	424.285	287.04	113.647	317.81	3310	307.05	387.168	288.34	86.6779
311.67	3946.8	297.65	3569.25	309.21	415.671	296.06	395.796	297.03	103.422	314.94	3313.73	307.64	427.074	291.96	82.036	319.24	3384.4	309.59	424.73	287.06	113.486	317.82	3306.09	307.06	386.823	288.35	86.585
311.68	3941.74	297.65	3572.95	309.24	413.992	296.06	395.361	297.04	103.318	314.94	3317.1	307.66	426.316	291.98	81.9517	319.25	3379.81	309.62	423.77	287.07	113.306	317.83	3302.76	307.07	386.255	288.37	86.472
311.69	3935.46	297.67	3561.89	309.24	414.265	296.09	395.127	297.06	103.196	314.96	3310.73	307.67	425.407	291.99	81.8746	319.26	3376.1	309.63	423.365	287.1	113.142	317.84	3299.22	307.08	385.849	288.38	86.3683
311.7	3930.96	297.67	3565.06	309.25	412.98	296.09	394.712	297.07	103.094	314.97	3307.63	307.67	425.851	292	81.7955	319.27	3371.76	309.64	423.123	287.11	112.96	317.85	3296.16	307.09	385.423	288.4	86.2573
311.71	3925.03	297.68	3558.08	309.26	413.628	296.11	394.337	297.09	102.97	314.98	3303.46	307.7	424.184	292.02	81.7192	319.28	3368.33	309.66	422.648	287.13	112.803	317.86	3291.04	307.1	385.068	288.42	86.1655
311.72	3920.37	297.69	3554.87	309.28	411.756	296.11	393.891	297.09	102.872	314.99	3299.75	307.7	424.73	292.03	81.6369	319.29	3363.95	309.67	422.274	287.15	112.631	317.87	3287.57	307.12	384.713	288.43	86.0602
311.73	3914.2	297.7	3550.9	309.28	412.373	296.14	393.272	297.12	102.748	315.01	3292.82	307.74	423.072	292.04	81.567	319.3	3359.96	309.68	421.93	287.17	112.482	317.89	3283.54	307.13	384.409	288.44	85.9668
311.74	3909.12	297.71	3547.49	309.3	411.27	296.13	393.181	297.12	102.646	315.01	3296.11	307.74	423.537	292.06	81.4855	319.31	3355.28	309.69	421.425	287.19	112.305	317.9	3280.13	307.15	384.013	288.46	85.8631
311.75	3902.65	297.72	3543.57	309.32	410.268	296.15	392.492	297.15	102.525	315.03	3285.47	307.76	421.829	292.07	81.406	319.32	3351.53	309.72	420.545	287.21	112.15	317.91	3276.02	307.17	383.668	288.48	85.7781
311.77	3898.13	297.73	3540.2	309.33	409.641	296.15	392.036	297.16	102.424	315.03	3288.77	307.77	422.344	292.08	81.3225	319.33	3347.1	309.72	420.98	287.23	111.974	317.92	3272.57	307.18	383.333	288.49	85.6807
311.78	3892.47	297.75	3532.57	309.36	408.375	296.17	391.316	297.18	102.305	315.05	3278.14	307.78	420.939	292.1	81.251	319.34	3343.5	309.74	420.131	287.25	111.818	317.93	3268.66	307.19	382.978	288.5	85.593
311.79	3888.43	297.75	3536.3	309.37	407.586	296.17	390.849	297.18	102.201	315.05	3281.37	307.78	421.283	292.11	81.198	319.36	3339	309.76	419.302	287.26	111.646	317.94	3265.59	307.2	382.582	288.52	85.4856
311.8	3883.36	297.77	3528.29	309.4	407.282	296.19	390.2	297.2	102.075	315.07	3270.95	307.8	419.969	292.12	81.1164	319.37	3335.07	309.77	418.857	287.28	111.496	317.95	3261.89	307.2	382.217	288.53	85.395
311.82	3879.4	297.78	3525.03	309.41	406.797	296.2	389.866	297.22	101.969	315.07	3274.32	307.8	420.394	292.14	81.0401	319.38	3330.05	309.79	417.724	287.3	111.318	317.96	3257.91	307.21	381.719	288.54	85.2988
311.83	3874.32	297.79	3521.48	309.44	406.392	296.22	389.531	297.24	101.848	315.09	3264.07	307.82	419.484	292.15	80.9674	319.39	3326.39	309.79	418.26	287.32	111.164	317.97	3254.21	307.21	381.324	288.56	85.2159
311.84	3870.36	297.8	3518.05	309.44	406.716	296.24	388.75	297.25	101.747	315.09	3267.27	307.83	418.998	292.16	80.8754	319.4	3322.08	309.81	417.107	287.33	110.98	317.98	3251.23	307.22	380.948	288.57	85.1201
311.85	3865.11	297.81	3514.15	309.46	407.647	296.26	388.547	297.27	101.629	315.11	3256.35	307.85	418.462	292.18	80.8083	319.41	3318.3	309.82	416.612	287.35	110.833	317.99	3247.38	307.22	380.532	288.59	85.0391
311.86	3860.75	297.82	3510.95	309.47	407.647	296.28	388.182	297.28	101.527	315.11	3259.98	307.86	418.179	292.19	80.7228	319.42	3313.65	309.84	415.924	287.37	110.667	318	3244.13	307.24	380.014	288.6	84.9305
311.87	3855.43	297.83	3507.03	309.48	407.91	296.3	387.543	297.29	101.402	315.13	3248.84	307.88	417.532	292.2	80.6484	319.43	3309.9	309.85	415.58	287.39	110.518	318.01	3240.32	307.25	379.618	288.61	84.8406
311.88	3851.35	297.84	3504.01	309.48	407.94	296.31	387.127	297.31	101.295	315.13	3252.2	307.89	417.036	292.21	80.5729	319.45	3303.58	309.86	415.125	287.41	110.341	318.02	3237.13	307.27	379.08	288.63	84.7232
311.89	3846.32	297.85	3500.18	309.5	407.444	296.33	386.681	297.33	101.175	315.15	3241.67	307.91	416.561	292.23	80.4965	319.45	3306.91	309.87	414.265	287.43	110.195	318.03	3233.12	307.29	378.745	288.64	84.6402
311.91	3842.5	297.86	3497.65	309.52	407.272	296.34	386.245	297.34	101.074	315.15	3244.91	307.93	416.167	292.24	80.4122	319.47	3295.72	309.87	414.74	287.45	110.024	318.04	3230.41	307.31	378.41	288.65	84.5412
311.92	3839.11	297.87	3493.55	309.53	406.736	296.36	385.667	297.36	100.975	315.17	3234.49	307.94	415.529	292.25	80.3346	319.47	3299.31	309.89	413.769	287.47	109.878	318.06	3226.76	307.32	377.994	288.67	84.4578
311.93	3835.26	297.88	3486.48	309.55	406.493	296.37	385.271	297.37	100.873	315.17	3237.77	307.97	414.477	292.27	80.2534	319.49	3291.23	309.9	412.768	287.48	109.714	318.07	3223.71	307.34	377.415	288.68	84.3523
311.94	3830.4	297.88	3490.26	309.56	404.731	296.38	384.571	297.39	100.757	315.19	3226.88	307.97	415.034	292.28	80.1843	319.5	3287.63	309.9	413.223	287.5	109.572	318.08	3219.88	307.35	377.07	288.69	84.2665
311.95	3826.38	297.89	3483.3	309.58	404.377	296.39	384.165	297.4	100.654	315.19	3230.33	308	413.668	292.29	80.0987	319.51	3279.69	309.93	412.302	287.52	109.411	318.09	3216.92	307.37	376.715	288.71	84.1667
311.96	3821.53	297.9	3479.64	309.59	403.719	296.39	383.729	297.42	100.536	315.21	3220.38	308	413.931	292.31	80.0268	319.51	3283.43	309.94	411.786	287.54	109.267	318.1	3213.76	307.38	376.481	288.72	84.0797
311.97	3817.15	297.91	3476.29	309.6	402.574	296.4	383.353	297.43	100.432	315.21	3222.86	308.03	412.626	292.32	79.9589	319.53	3272.08	309.96	411.857	287.55	109.098	318.11	3210.41	307.38	376.136	288.74	83.979
311.98	3811.47	297.92	3472.18	309.6	403.273	296.4	383.12	297.45	100.3	315.23	3213.36	308.03	413.233	292.33	79.8914	319.53	3275.54	309.98	411.402	287.57	108.948	318.12	3206.84	307.39	375.74	288.75	83.8968
311.99	3807.03	297.94	3464.1	309.61	402.068	296.42	382.714	297.46	100.198	315.23	3216.57	308.04	411.827	292.35	79.8214	319.54	3267.5	310	410.865	287.59	108.787	318.13	3203.76	307.39	375.445	288.77	83.8045
312	3801.68	297.94	3468.77	309.62	401.166	296.42	382.034	297.48	100.081	315.25	3209.4	308.04	412.14	292.36	79.7567	319.55	3263.91	310.01	410.582	287.61	108.642	318.14	3199.93	307.41	375.222	288.78	83.7175
312.01	3797.41	297.96	3457.33	309.64	400.467	296.44	381.557	297.49	99.9806	315.26	3206.07	308.05	410.916	292.37	79.6811	319.56	3259.85	310.03	410.197	287.63	108.482	318.15	3196.64	307.42	374.745	288.79	83.6116
312.02	3792.04	297.96	3460.72	309.65	399.788	296.45	381.263	297.51	99.8744	315.27	3202.48	308.05	411.452	292.38	79.6124	319.57	3256.48	310.04	409.661	287.64	108.344	318.16	3192.85	307.44	374.562	288.81	83.5293
312.03	3787.66	297.98	3450.26	309.68	398.836	296.47	380.846	297.52	99.7713	315.28	3199.28	308.06	410.511	292.4	79.5296	319.58	3252.64	310.04	410.066	287.66	108.18	318.17	3189.59	307.43	374.369	288.82	83.4334
312.05	3782.91	297.98	3454.17	309.68	399.049	296.49	380.359	297.53	99.6524	315.29	3195.52	308.07	409.995	292.41	79.4592	319.59	3249.57	310.06	408.204	287.68	108.041	318.18	3185.65	307.47	374.084	288.84	83.352
312.05	3779.29	298	3443.41	309.7	398.39	296.51	379.984	297.55	99.5525	315.3	3192.39	308.08	409.55	292.42	79.3881	319.6	3245.89	310.06	409.287	287.7	107.879	318.19	3182.25	307.46	373.658	288.85	83.2637
312.07	3774.74	298	3447.09	309.72	398.168	296.53	379.243	297.56	99.4347	315.32	3184.88	308.1	409.024	292.43	79.3157	319.61	3242.89	310.08	407.849	287.72	107.74	318.2	3178.58	307.5	373.404	288.86	83.1871
312.08	3771.54	298.01	3440.32	309.75	398.016	296.55	378.786	297.57	99.3388	315.32	3187.97	308.11	408.659	292.45	79.2377	319.62	3239.15	310.09	407.333	287.74	107.578	318.21	3175.33	307.5	372.825	288.88	83.0956
312.09	3768.1	298.02	3436.51	309.77	398.127	296.57	378.38	297.59	99.2266	315.33	3181.13	308.13	407.991	292.46	79.1666	319.63	3235.42	310.11	407.1	287.75	107.44	318.22	3171.46	307.52	372.409	288.89	83.0165
312.1	3764.7	298.03	3433.26	309.77	398.289	296.58	378.035	297.61	99.1307	315.34	3178.17	308.15	407.546	292.47	79.0809	319.65	3229.08	310.13	406.179	287.77	107.287	318.23	3168.29	307.51	372.022	288.9	82.9286
312.11	3759.97	298.04	3429.63	309.78	398.411	296.6	377.446	297.62	99.0133	315.35	3174.66	308.16	406.898	292.48	79.0118	319.65	3232.11	310.13	406.726	287.79	107.155	318.24	3164.53	307.53	371.626	288.92	82.8436
312.12	3756.63	298.05	3426.49	309.79	398.37	296.6	377.019	297.64	98.9134	315.36	3171.49	308.18	406.422	292.5	78.9386	319.67	3222.99	310.15	405.187	287.81	106.993	318.25	3161.4	307.55	371.078	288.93	82.7565
312.13	3752.18	298.06	3422.71	309.81	397.752	296.63	376.552	297.66	98.7999	315.37	3167.01	308.2	405.835	292.51	78.8742	319.67	3225.9	310.16	405.673	287.82	106.855	318.26	3157.58	307.55	370.773	288.95	82.6798
312.14	3748.74	298.07	3419.28	309.83	396.901	296.62	376.156	297.67	98.7044	315.38	3163.88	308.21	405.41	292.52	78.8034	319.69	3216.61	310.18	404.235	287.84	106.697	318.27	3154.29	307.58	370.407	288.96	82.5875
312.16	3744.6	298.08	3415.33	309.83	397.519	296.65	375.73	297.69	98.6029	315.39	3160.34	308.23	404.853	292.53	78.7339	319.69	3219.65	310.19	404.67	287.86	106.563	318.28	3150.94	307.58	370.077	288.97	82.5104
312.17	3741.07	298.09	3411.91	309.84	395.482	296.63	375.405	297.7	98.505	315.4	3157.26	308.24	404.458	292.55	78.6446	319.71	3210.2	310.2	403.232	287.88	106.4	318.29	3148.64	307.62	369.701	288.99	82.4354
312.19	3736.28	298.1	3408.17	309.85	396.465	296.66	374.999	297.72	98.3939	315.41	3153.53	308.26	404.002	292.56	78.5746	319.71	3213.16	310.21	403.81	287.89	106.258	318.3	3145.42	307.62	369.463	289	82.3599
312.19	3732.72	298.11	3404.76	309.87	394.134	296.65	374.623	297.73	98.296	315.42	3150.57	308.27	403.617	292.57	78.4938	319.73	3206.77	310.22	402.098	287.91	106.103	318.31	3142.6	307.64	369.222	289.01	82.2696
312.21	3728.25	298.12	3400.58	309.88	395.148	296.67	374.105	297.74	98.1837	315.43	3147.02	308.3	402.918	292.58	78.4238	319.74	3203.91	310.22	402.615	287.93	105.968	318.32	3139.11	307.65	368.911	289.02	82.1885
312.21	3724.73	298.13	3397.2	309.9	393.029	296.69	373.709	297.75	98.0913	315.44	3143.98	308.3	403.283	292.6	78.3454	319.75	3197.73	310.24	401.49	287.95	105.812	318.33	3135.94	307.67	368.543	289.04	82.0934
312.23	3720.02	298.14	3393.26	309.91	393.566	296.7	373.12	297.77	97.9878	315.45	3140.72	308.32	401.906	292.61	78.2838	319.75	3200.37	310.25	400.589	287.96	105.678	318.34	3132.28	307.68	368.267	289.05	82.0115
312.23	3715.91	298.15	3386.66	309.93	389.986	296.71	372.683	297.78	97.8934	315.46	3137.77	308.33	400.984	292.62	78.1712	319.77	3192.05	310.26	401.085	287.98	105.53	318.35	3129.04	307.68	367.951	289.06	81.9207
312.25	3711	298.15	3390.32	309.93	392.583	296.72	372.226	297.8	97.791	315.47	3134.13	308.33	402.351	292.63	78.1008	319.77	3194.59	310.27	400.204	288	105.399	318.36	3125.31	307.7	367.436	289.08	81.842
312.25	3707.02	298.16	3383.32	309.95	388.09	296.75	371.86	297.81	97.701	315.48	3131.56	308.34	401.44	292.65	78.0115	319.79	3186.9	310.29	399.9	288.02	105.242	318.37	3122.56	307.7	367.165	289.09	81.7453
312.27	3701.74	298.17	3379.25	309.95	388.393	296.76	371.393	297.83	97.5939	315.5	3128.01	308.35	400.305	292.66	77.9443	319.79	3189.25	310.31	399.728	288.03	105.106	318.38	3118.83	307.71	367.59	289.1	81.6642
312.27	3697.66	298.18	3375.98	309.97	387.572	296.79	370.966	297.84	97.5007	315.51	3125.82	308.35	400.65	292.68	77.8631	319.81	3181.19	310.32	399.272	288.05	104.956	318.39	3115.59	307.72	368.254	289.12	81.5738
312.29	3693.04	298.19	3372.09	309.98	387.076	296.8	370.394	297.86	97.3952	315.52	3122.49	308.37	400.194	292.69	77.789	319.81	3183.78	310.35	398.907	288.07	104.82	318.4	3111.97	307.74	368.303	289.13	81.4859
312.29	3689.11	298.2	3368.64	309.99	386.669	296.81	370.428	297.87	97.3055	315.53	3119.72	308.38	399.819	292.7	77.7109	319.82	3178.22	310.36	398.532	288.09	104.665	318.41	3108.85	307.74	369.228	289.15	81.3891
312.31	3684.14	298.21	3364.68	310.01	386.427	296.83	370.029	297.89	97.2	315.54	3116.3	308.4	399.444	292.71	77.6445	319.83	3175.44	310.38	398.208	288.1	104.53	318.42	3105.45	307.76	369.517	289.16	81.3116
312.31	3679.86	298.22	3361.22	310.02	386.051	296.84	369.713	297.9	97.1071	315.55	3113.51	308.42	399.14	292.73	77.5621	319.84	3170.63	310.39	397.6	288.12	104.377	318.43	3102.82	307.76	370.338	289.17	81.218
312.34	3674.8	298.23	3357.12	310.04	388.02	296.87	369.308	297.92	96.9988	315.56	3110.19	308.43	398.654	292.74	77.4953	319.85	3167.68	310.41	397.134	288.14	104.239	318.44	3099.48	307.78	370.942	289.18	81.1328
312.34	3670.91	298.24	3352.91	310.05	388.801	296.88	368.948	297.93	96.9087	315.57	3107.57	308.45	398.34	292.75	77.4132	319.86	3164.35	310.42	396.475	288.16	104.083	318.45	3096.11	307.79	371.829	289.2	81.0384
312.36	3664.87	298.25	3348.97	310.09	387.878	296.9	368.47	297.95	96.7785	315.58	3104.21	308.46	397.772	292.76	77.3459	319.87	3161.68	310.43	395.745	288.17	103.943	318.46	3093.38	307.8	371.555	289.21	80.9509
312.36	3661.34	298.26	3345.96	310.09	388.202	296.9	368.15	297.96	96.6888	315.59	3101.44	308.48	396.394	292.77	77.2614	319.88	3158.42	310.44	395.067	288.19	103.778	318.47	3090.52	307.81	371.311	289.23	80.8585
312.38	3657.2	298.27	3342.5	310.12	387.026	296.92	367.911	297.98	96.5792	315.6	3098.33	308.48	397.306	292.78	77.191	319.89	3155.67	310.45	394.62	288.2	103.641	318.48	3087.34	307.81	371.332	289.24	80.7814
312.38	3653.73	298.28	3339.57	310.12	387.371	296.93	367.265	297.99	96.4899	315.61	3095.57	308.49	395.817	292.8	77.1057	319.9	3152.25	310.46	394.002	288.23	103.474	318.49	3084.39	307.83	370.864	289.25	80.6893
312.4	3649.13	298.29	3335.91	310.14	385.494	296.93	366.877	298.01	96.3796	315.63	3088.39	308.51	396.009	292.8	77.0356	319.91	3150.24	310.47	393.495	288.24	103.333	318.5	3080.62	307.83	370.61	289.26	80.6094
312.4	3646.31	298.3	3332.85	310.14	386.062	296.95	366.47	298.02	96.2883	315.63	3091.86	308.52	394.975	292.82	76.9439	319.92	3146.68	310.49	392.492	288.26	103.177	318.51	3078.06	307.85	370.316	289.28	80.519
312.42	3642.89	298.31	3329.29	310.16	383.82	296.95	365.928	298.04	96.193	315.64	3084.86	308.52	395.33	292.83	76.8738	319.93	3143.62	310.49	392.958	288.28	103.044	318.52	3074.95	307.86	370.016	289.29	80.4386
312.42	3640.29	298.32	3326.37	310.17	384.459	296.95	365.54	298.05	96.1081	315.65	3081.76	308.54	394.114	292.84	76.7816	319.94	3140.27	310.5	392.39	288.3	102.913	318.53	3072.28	307.88	369.628	289.31	80.2626
312.44	3636.71	298.33	3323.04	310.18	383.15	296.97	365.115	298.07	96.0065	315.66	3078.35	308.55	394.57	292.85	76.7124	319.95	3137.24	310.51	392.208	288.31	102.784	318.54	3068.89	307.9	369.322	289.31	80.3426
312.44	3634.32	298.34	3320.05	310.19	382.602	296.98	364.772	298.08	95.9252	315.67	3075.65	308.57	393.333	292.87	76.6271	319.96	3133.82	310.54	392.147	288.33	102.637	318.55	3066.15	307.91	368.994	289.33	80.1722
312.47	3631.39	298.35	3316.37	310.21	381.841	296.98	364.293	298.1	95.81	315.68	3072.3	308.57	393.769	292.88	76.5582	319.97	3130.84	310.55	391.914	288.35	102.506	318.56	3062.4	307.94	368.181	289.34	80.0947
312.47	3628.25	298.36	3313.45	310.21	382.227	296.99	363.887	298.11	95.7247	315.69	3069.56	308.59	392.918	292.89	76.4725	319.99	3123.86	310.56	391.529	288.37	102.353	318.57	3059.18	307.95	367.862	289.36	80.0086
312.49	3624.26	298.37	3310.21	310.23	382.024	297.01	363.48	298.12	95.6497	315.7	3066.24	308.6	392.198	292.9	76.4081	319.99	3127.14	310.57	390.94	288.38	102.223	318.58	3055.9	307.97	367.526	289.37	79.9347
312.49	3620.71	298.38	3307.22	310.24	381.719	297.01	363.227	298.13	95.5676	315.71	3060.13	308.61	391.914	292.91	76.3215	320.01	3117.42	310.57	391.265	288.4	102.068	318.59	3053.18	307.98	367.111	289.38	79.8467
312.51	3616.3	298.39	3300.66	310.26	381.648	297.03	362.875	298.15	95.4679	315.71	3063.43	308.62	391.255	292.93	76.2567	320.01	3120.39	310.59	390.758	288.42	101.938	318.6	3050.7	308	366.723	289.39	79.7703
312.51	3612.44	298.39	3303.77	310.27	381.415	297.06	362.586	298.16	95.3766	315.73	3057.19	308.63	391.154	292.94	76.179	320.03	3110.9	310.6	389.866	288.44	101.788	318.61	3048.08	308.01	366.208	289.41	79.6875
312.53	3607.53	298.4	3297.19	310.29	380.968	297.06	362.269	298.18	95.2725	315.74	3054.07	308.64	390.768	292.95	76.1125	320.03	3113.81	310.62	389.45	288.45	101.661	318.62	3041.82	308.02	365.685	289.42	79.6131
312.53	3604.45	298.41	3294.13	310.3	380.664	297.08	361.98	298.19	95.1852	315.75	3051.35	308.65	390.535	292.96	76.0292	320.04	3107.38	310.63	388.74	288.47	101.51	318.62	3044.67	308.03	365.233	289.44	79.5247
312.55	3601.22	298.42	3290.76	310.32	380.207	297.09	361.799	298.21	95.0887	315.76	3047.92	308.67	390.393	292.98	75.9651	320.05	3104.57	310.64	388.385	288.49	101.378	318.64	3036.6	308.04	365.323	289.45	79.4475
312.56	3598.12	298.43	3287.91	310.33	379.76	297.11	361.492	298.22	95.0021	315.77	3045.11	308.68	390.19	292.99	75.8769	320.06	3101.15	310.65	388.03	288.51	101.229	318.64	3039.32	308.05	364.799	289.46	79.3575
312.57	3594.09	298.44	3284.75	310.35	379.08	297.13	361.184	298.24	94.9044	315.78	3041.48	308.71	389.754	293	75.8109	320.07	3098.41	310.66	387.685	288.52	101.1	318.66	3031.61	308.06	364.42	289.47	79.2811
312.58	3590.55	298.45	3282.07	310.35	379.425	297.14	360.904	298.25	94.8155	315.79	3038.78	308.72	389.379	293.02	75.7163	320.08	3091.87	310.68	387.361	288.55	100.961	318.66	3034.09	308.06	364.149	289.49	79.2075
312.59	3586.18	298.46	3279.13	310.37	377.7	297.16	360.506	298.27	94.7046	315.8	3035.67	308.74	388.365	293.03	75.6538	320.08	3094.92	310.69	387.006	288.56	100.821	318.68	3025.96	308.07	363.797	289.5	79.1307
312.6	3582.83	298.47	3276.69	310.37	378.197	297.15	360.19	298.28	94.62	315.81	3033	308.74	389.004	293.04	75.5773	320.1	3085.64	310.71	386.793	288.58	100.664	318.68	3029.21	308.07	363.634	289.51	79.0351
312.61	3578.89	298.48	3274.2	310.39	377.618	297.18	359.828	298.3	94.5251	315.82	3029.84	308.76	387.848	293.05	75.512	320.1	3088.36	310.72	386.488	288.59	100.529	318.7	3019.7	308.1	363.363	289.53	78.9587
312.62	3575.72	298.49	3271.64	310.4	377.273	297.17	359.584	298.31	94.4425	315.83	3027.1	308.77	386.793	293.07	75.4299	320.12	3079.29	310.73	385.555	288.62	100.378	318.7	3022.64	308.09	362.839	289.54	78.8686
312.64	3571.83	298.5	3268.65	310.41	376.928	297.21	359.575	298.33	94.3423	315.84	3023.98	308.77	387.381	293.08	75.3658	320.12	3082.26	310.73	386.012	288.63	100.249	318.72	3013.44	308.11	361.871	289.55	78.7906
312.64	3568.47	298.51	3265.98	310.43	375.933	297.2	359.267	298.34	94.2565	315.85	3017.77	308.78	386.346	293.09	75.2925	320.14	3075.86	310.75	385.555	288.65	100.104	318.72	3016.31	308.12	361.319	289.57	78.7013
312.66	3564.82	298.52	3260.38	310.43	376.674	297.22	358.887	298.36	94.154	315.85	3021.31	308.8	385.798	293.1	75.2204	320.15	3072.56	310.76	385.099	288.66	99.9723	318.74	3007.26	308.14	360.27	289.58	78.6253
312.66	3561.92	298.52	3263.07	310.45	375.649	297.21	358.589	298.37	94.0726	315.86	3015.07	308.81	385.393	293.11	75.1382	320.16	3068.68	310.78	384.5	288.69	99.8196	318.74	3009.93	308.15	359.873	289.59	78.5344
312.68	3558.16	298.53	3258.07	310.46	375.669	297.24	358.344	298.39	93.9693	315.87	3012.03	308.83	384.987	293.12	75.0762	320.17	3065.42	310.79	383.445	288.7	99.6883	318.76	3001.07	308.17	359.511	289.61	78.4584
312.69	3555.49	298.54	3255.86	310.49	374.867	297.25	358.091	298.4	93.8815	315.88	3009.04	308.84	384.733	293.14	75.0073	320.18	3061.59	310.79	384.906	288.72	99.5423	318.76	3004.01	308.17	359.131	289.62	78.3727
312.7	3552.21	298.55	3252.55	310.49	375.527	297.26	357.674	298.41	93.7769	315.89	3005.79	308.87	384.084	293.15	74.9448	320.19	3058.51	310.8	383.962	288.74	99.419	318.78	2995.14	308.19	358.778	289.63	78.2971
312.71	3549.49	298.56	3249.74	310.5	374.603	297.27	357.312	298.43	93.6923	315.9	3002.3	308.87	384.358	293.16	74.8727	320.2	3054.83	310.82	382.988	288.76	99.2781	318.78	2997.78	308.2	358.788	289.65	78.2054
312.72	3545.58	298.57	3246.18	310.51	373.973	297.28	356.389	298.44	93.5889	315.91	2998.92	308.89	383.12	293.17	74.8135	320.21	3051.96	310.83	382.623	288.77	99.1579	318.79	2991.86	308.22	359.113	289.66	78.1358
312.73	3542.82	298.58	3243.4	310.53	373.729	297.28	356.136	298.46	93.5051	315.92	2996.05	308.9	383.516	293.19	74.7458	320.22	3048.46	310.86	381.273	288.79	99.0162	318.8	2989.24	308.22	359.059	289.67	78.0578
312.75	3539.08	298.59	3240.37	310.54	372.977	297.3	355.756	298.47	93.4105	315.93	2992.89	308.91	382.521	293.2	74.6866	320.23	3045.72	310.86	381.679	288.81	98.8957	318.81	2983.11	308.24	359.457	289.69	77.9861
312.75	3536.05	298.6	3237.66	310.55	372.683	297.32	355.538	298.48	93.3295	315.94	2990.29	308.92	381.679	293.21	74.6164	320.24	3042.66	310.87	380.004	288.82	98.7552	318.81	2985.95	308.24	359.077	289.7	77.9
312.76	3532.25	298.61	3234.42	310.56	372.022	297.33	355.022	298.5	93.2357	315.95	2987.08	308.93	382.826	293.22	74.5559	320.25	3039.81	310.87	380.41	288.84	98.6354	318.83	2976.95	308.26	358.779	289.72	77.8312
312.77	3529.4	298.62	3231.77	310.57	372.033	297.34	354.597	298.51	93.1483	315.96	2984.23	308.94	382.135	293.24	74.4833	320.26	3036.36	310.9	380.126	288.86	98.5028	318.83	2979.77	308.26	358.562	289.73	77.7528
312.78	3525.55	298.63	3228.57	310.59	371.697	297.36	354.08	298.53	93.0449	315.97	2980.99	308.95	380.918	293.25	74.427	320.27	3033.38	310.92	379.781	288.87	98.3877	318.85	2970.38	308.27	358.236	289.74	77.6828
312.79	3522.32	298.64	3222.43	310.61	371.606	297.39	353.7	298.54	92.9586	315.98	2978.25	308.95	381.324	293.27	74.3529	320.28	3029.83	310.94	378.806	288.89	98.2527	318.85	2973.01	308.28	357.955	289.75	77.6003
312.8	3518.7	298.64	3225.79	310.62	370.75	297.4	353.138	298.55	92.8588	315.99	2974.92	308.96	380.633	293.28	74.2936	320.29	3027.11	310.94	379.08	288.91	98.1257	318.87	2964.48	308.3	357.648	289.77	77.5267
312.81	3515.62	298.65	3219.43	310.62	371.159	297.42	353.048	298.57	92.7698	316	2972.23	308.97	380.359	293.29	74.2251	320.3	3020.24	310.94	379.405	288.93	97.9931	318.87	2967.1	308.3	357.43	289.78	77.4434
312.82	3511.67	298.66	3216.26	310.64	370.472	297.44	352.622	298.58	92.6675	316.01	2966.49	308.98	379.76	293.3	74.1659	320.3	3023.78	310.96	378.542	288.94	97.8756	318.88	2961.5	308.32	357.059	289.79	77.3693
312.84	3508.61	298.67	3213.87	310.66	370.232	297.46	352.169	298.6	92.5825	316.01	2969.16	309	379.476	293.31	74.0987	320.32	3014.56	310.98	378.187	288.96	97.7362	318.89	2958.57	308.32	356.833	289.81	77.2969
312.84	3504.59	298.68	3211.09	310.67	370.046	297.48	351.734	298.61	92.4874	316.03	2961.43	309.01	379.121	293.32	74.0413	320.32	3016.98	310.99	377.903	288.98	97.6132	318.9	2955.74	308.34	356.489	289.82	77.2224
312.85	3501.41	298.69	3208.47	310.68	369.519	297.49	351.516	298.63	92.4048	316.03	2963.65	309.02	378.816	293.34	73.9782	320.33	3011.69	311	376.522	288.99	97.4423	318.91	2952.88	308.36	356.054	289.83	77.1383
312.86	3498.19	298.7	3205.32	310.69	369.143	297.5	351.289	298.64	92.3085	316.05	2955.47	309.03	378.319	293.35	73.9178	320.34	3009.53	311	376.857	289.01	97.3136	318.92	2949.7	308.38	355.801	289.85	77.0687
312.88	3494.51	298.71	3202.67	310.7	368.731	297.5	351.117	298.65	92.2175	316.05	2958.3	309.05	378.014	293.37	73.8462	320.35	3006.66	311.03	376.085	289.02	97.1702	318.93	2947.01	308.38	355.321	289.86	77.0011
312.88	3489.63	298.72	3196.57	310.71	368.574	297.5	350.936	298.67	92.1248	316.07	2949.54	309.07	377.649	293.37	73.7884	320.36	3004.34	311.04	375.76	289.04	97.0467	318.95	2941.77	308.4	354.941	289.87	76.9338
312.9	3486.85	298.72	3199.45	310.73	368.023	297.51	350.347	298.68	92.043	316.07	2952.21	309.09	377.243	293.39	73.717	320.37	3001.78	311.06	374.755	289.06	96.914	318.95	2944.21	308.41	354.633	289.88	76.8521
312.9	3482.69	298.73	3193.14	310.73	368.379	297.51	350.093	298.7	91.92	316.09	2943.57	309.1	376.908	293.4	73.6591	320.38	2999.64	311.06	375.141	289.07	96.7926	318.97	2936.22	308.42	354.379	289.9	76.7821
312.92	3479.41	298.74	3190.57	310.75	367.644	297.53	349.803	298.71	91.8361	316.09	2946.3	309.11	376.512	293.42	73.5947	320.39	2996.44	311.08	374.501	289.09	96.6635	318.97	2938.68	308.43	353.89	289.91	76.6995
312.92	3475.13	298.75	3187.46	310.76	367.211	297.53	349.549	298.73	91.7322	316.11	2937.97	309.12	375.913	293.42	73.5369	320.4	2993.88	311.1	374.115	289.11	96.5483	318.98	2932.2	308.44	353.646	289.92	76.6291
312.94	3472.19	298.76	3184.91	310.77	366.84	297.55	349.204	298.74	91.6523	316.11	2940.48	309.13	375.608	293.44	73.4695	320.41	2991.13	311.11	373.587	289.13	96.416	318.99	2929.38	308.44	353.229	289.93	76.5474
312.94	3468.3	298.77	3181.7	310.79	366.597	297.56	348.669	298.75	91.5548	316.12	2934.79	309.14	375.141	293.45	73.4139	320.42	2988.7	311.12	372.327	289.14	96.3076	319.01	2923.59	308.45	352.957	289.95	76.4052
312.96	3465.32	298.78	3179.27	310.8	366.317	297.58	348.243	298.77	91.4729	316.13	2932.09	309.15	373.973	293.47	73.3485	320.43	2985.67	311.12	372.734	289.16	96.1709	319.01	2926.23	308.46	352.685	289.95	76.4801
312.97	3461.42	298.79	3173.72	310.82	365.983	297.59	347.816	298.78	91.3742	316.15	2926.69	309.15	374.785	293.47	73.2917	320.44	2983.3	311.12	373.211	289.17	96.0545	319.03	2918.42	308.48	352.395	289.97	76.3412
312.98	3458.34	298.79	3176.34	310.83	365.675	297.62	347.608	298.79	91.2951	316.15	2929.05	309.16	374.298	293.49	73.24	320.45	2980.45	311.14	371.941	289.19	95.9226	319.03	2920.9	308.49	351.933	289.98	76.2607
312.99	3454.11	298.81	3168.42	310.84	364.736	297.63	347.227	298.8	91.1948	316.16	2923.67	309.18	373.252	293.5	73.1854	320.46	2978.32	311.15	371.606	289.21	95.8093	319.05	2911.95	308.51	351.707	290	76.0984
313	3450.68	298.81	3170.95	310.85	365.106	297.65	346.936	298.82	91.1165	316.17	2920.85	309.18	373.546	293.51	73.1278	320.47	2975.64	311.16	371.118	289.22	95.6726	319.05	2914.53	308.51	351.516	290	76.1886
313.01	3446.41	298.83	3162	310.86	364.275	297.66	346.546	298.83	91.0286	316.18	2917.59	309.2	372.856	293.52	73.0741	320.48	2973.64	311.17	370.763	289.24	95.5686	319.06	2905.48	308.53	350.891	290.02	76.0336
313.02	3443.14	298.83	3164.99	310.87	363.914	297.68	346.292	298.85	90.9466	316.19	2914.97	309.21	372.398	293.53	73.0207	320.49	2970.96	311.18	370.404	289.25	95.4493	319.07	2907.94	308.54	350.174	290.03	75.9539
313.03	3439.26	298.84	3155.2	310.89	362.893	297.68	346.129	298.86	90.8503	316.2	2911.67	309.22	371.88	293.54	72.9702	320.5	2968.69	311.21	370.096	289.27	95.3445	319.08	2899.49	308.55	349.43	290.04	75.8967
313.04	3436.19	298.84	3157.99	310.89	363.345	297.7	345.902	298.88	90.7708	316.21	2908.92	309.25	370.966	293.56	72.9158	320.51	2963.47	311.22	369.669	289.28	95.2189	319.08	2902.17	308.57	348.578	290.05	75.821
313.05	3432.16	298.86	3148.94	310.91	362.161	297.71	345.566	298.89	90.6792	316.22	2903.11	309.25	371.443	293.57	72.8659	320.51	2965.93	311.24	369.278	289.3	95.1116	319.1	2895.16	308.57	348.079	290.07	75.7707
313.06	3428.5	298.86	3151.82	310.91	362.504	297.71	345.275	298.9	90.5985	316.22	2905.76	309.29	370.214	293.58	72.797	320.53	2959.22	311.25	368.901	289.32	94.9808	319.1	2896.6	308.59	347.607	290.08	75.6974
313.07	3423.88	298.88	3142.66	310.94	362.215	297.72	344.949	298.92	90.5054	316.24	2897.91	309.29	370.6	293.59	72.7454	320.53	2961.55	311.27	368.584	289.33	94.8711	319.12	2889.7	308.59	347.226	290.09	75.6422
313.08	3420.23	298.88	3145.39	310.95	361.971	297.73	344.622	298.93	90.4222	316.24	2900.38	309.32	369.517	293.61	72.6908	320.55	2953.96	311.28	368.131	289.35	94.7419	319.12	2892.26	308.6	346.537	290.1	75.5649
313.09	3415.9	298.9	3135.62	310.97	361.89	297.73	344.231	298.94	90.3311	316.26	2892.33	309.32	369.842	293.62	72.6387	320.55	2956.47	311.29	367.797	289.36	94.629	319.14	2884.12	308.6	346.337	290.12	75.4976
313.1	3411.85	298.9	3138.7	310.98	361.609	297.74	343.977	298.96	90.2575	316.26	2894.85	309.34	369.033	293.63	72.575	320.57	2947.8	311.3	367.283	289.38	94.5009	319.14	2886.73	308.62	346.192	290.13	75.4194
313.11	3406.86	298.92	3129.74	311	361.32	297.75	343.468	298.97	90.17	316.28	2886.83	309.34	369.195	293.64	72.5222	320.57	2950.65	311.3	367.545	289.39	94.3876	319.15	2878.73	308.62	346.12	290.14	75.3517
313.12	3402.9	298.92	3132.45	311.02	361.067	297.77	343.178	298.99	90.0928	316.28	2889.29	309.36	368.363	293.65	72.4617	320.58	2944.68	311.31	366.831	289.41	94.2564	319.16	2881.08	308.63	346.083	290.15	75.2712
313.13	3398.53	298.93	3124.25	311.03	360.796	297.77	342.769	299	89.998	316.3	2882.04	309.36	368.808	293.66	72.4141	320.59	2942.14	311.31	367.066	289.42	94.1415	319.17	2873.22	308.65	345.774	290.17	75.1286
313.14	3394.88	298.93	3126.71	311.04	360.542	297.8	342.578	299.01	89.9177	316.3	2884.01	309.38	367.553	293.67	72.3553	320.6	2939.01	311.32	366.524	289.44	94.0106	319.17	2875.85	308.66	345.339	290.17	75.2051
313.15	3390.33	298.95	3118.94	311.06	359.828	297.8	342.16	299.03	89.8465	316.32	2876.83	309.39	368.014	293.68	72.3055	320.61	2936.48	311.33	366.272	289.46	93.8957	319.19	2867.65	308.68	344.794	290.19	75.0605
313.16	3387.4	298.95	3121.49	311.06	360.018	297.81	341.924	299.04	89.7693	316.32	2879.36	309.41	367.165	293.7	72.242	320.62	2933.26	311.34	366.019	289.48	93.7696	319.19	2870.34	308.7	344.113	290.2	74.9867
313.17	3383.31	298.97	3113.72	311.07	359.104	297.83	341.697	299.05	89.6749	316.34	2871.29	309.41	367.445	293.7	72.189	320.63	2930.73	311.36	365.82	289.49	93.6598	319.21	2861.94	308.72	343.295	290.22	74.8554
313.18	3380.2	298.97	3116.21	311.07	359.294	297.85	341.37	299.06	89.5978	316.34	2873.84	309.43	366.615	293.72	72.1442	320.64	2927.65	311.37	365.423	289.51	93.5337	319.21	2864.38	308.74	342.896	290.22	74.9223
313.2	3376.52	298.98	3107.98	311.08	358.616	297.86	341.097	299.08	89.511	316.36	2865.93	309.43	367.021	293.73	72.0894	320.65	2925.16	311.39	365.07	289.52	93.4248	319.23	2856.31	308.75	342.487	290.24	74.7143
313.2	3373.51	298.98	3110.5	311.09	358.824	297.87	340.888	299.09	89.4374	316.36	2868.36	309.45	366.389	293.74	72.036	320.66	2922.19	311.41	364.682	289.54	93.2978	319.23	2858.95	308.76	342.015	290.24	74.7897
313.21	3369.45	299	3101.79	311.11	357.837	297.89	340.643	299.11	89.3526	316.38	2860.83	309.47	365.946	293.75	71.9869	320.67	2919.86	311.42	364.339	289.55	93.1932	319.25	2851.3	308.76	341.788	290.27	74.5711
313.22	3366.22	299	3104.5	311.11	358.154	297.89	340.207	299.12	89.2798	316.38	2863.02	309.47	366.154	293.76	71.9282	320.68	2914.38	311.44	363.905	289.57	93.0679	319.25	2853.5	308.77	341.488	290.27	74.6495
313.23	3362.23	299.02	3095.46	311.14	357.195	297.91	339.815	299.13	89.1982	316.39	2858.04	309.48	365.377	293.77	71.8783	320.68	2916.91	311.45	363.589	289.58	92.9653	319.27	2846.06	308.77	341.261	290.29	74.4218
313.24	3358.9	299.02	3098.38	311.14	357.512	297.93	339.57	299.14	89.127	316.4	2855.51	309.49	365.82	293.79	71.8217	320.7	2908.79	311.46	363.173	289.6	92.8463	319.27	2848.4	308.78	341.424	290.29	74.5043
313.25	3354.69	299.03	3088.94	311.17	356.923	297.94	339.152	299.16	89.0394	316.41	2849.68	309.5	364.799	293.8	71.774	320.7	2911.38	311.47	362.839	289.61	92.7461	319.28	2840.43	308.78	341.524	290.31	74.3632
313.26	3351.47	299.03	3091.86	311.18	356.598	297.95	338.861	299.17	88.9714	316.41	2852.46	309.51	365.043	293.81	71.716	320.71	2905.57	311.48	362.414	289.63	92.6339	319.28	2842.65	308.78	340.852	290.32	74.2949
313.27	3346.98	299.05	3082.76	311.19	356.299	297.96	338.579	299.18	88.8818	316.43	2844.61	309.53	364.203	293.82	71.6697	320.72	2902.51	311.49	362.106	289.65	92.536	319.3	2835.52	308.79	340.67	290.34	74.1557
313.28	3344.3	299.05	3085.57	311.2	356	297.97	338.188	299.2	88.8065	316.43	2846.85	309.53	364.51	293.83	71.6138	320.73	2898.87	311.5	361.736	289.67	92.4138	319.3	2837.75	308.8	340.715	290.34	74.2366
313.3	3341.13	299.07	3076.9	311.22	355.629	297.99	337.87	299.21	88.7173	316.44	2841.81	309.54	363.526	293.84	71.5787	320.74	2896.06	311.52	361.501	289.68	92.312	319.32	2830.08	308.82	340.325	290.36	74.0918
313.3	3338.06	299.07	3079.55	311.24	355.43	297.99	337.67	299.23	88.6457	316.45	2840.14	309.55	363.778	293.85	71.5202	320.75	2889.98	311.54	361.148	289.7	92.1922	319.32	2832.53	308.83	339.825	290.37	74.0212
313.32	3334.6	299.08	3073.76	311.25	355.049	298.01	337.342	299.23	88.5609	316.46	2837.27	309.57	362.947	293.87	71.4722	320.75	2892.69	311.56	360.886	289.71	92.0915	319.33	2827.13	308.85	339.543	290.38	73.9581
313.32	3332.06	299.09	3070.92	311.27	354.207	298.02	337.006	299.26	88.4844	316.47	2835.03	309.57	363.173	293.88	71.4169	320.77	2884.77	311.56	360.877	289.73	91.9681	319.34	2824.54	308.85	339.143	290.39	73.8876
313.34	3328.84	299.1	3067.73	311.27	354.705	298.02	336.696	299.26	88.4012	316.48	2832.04	309.6	362.152	293.89	71.37	320.77	2887.12	311.58	359.945	289.74	91.8631	319.35	2821.6	308.87	339.052	290.41	73.8268
313.34	3326.12	299.11	3065.03	311.28	353.954	298.03	336.442	299.28	88.3272	316.49	2829.61	309.6	362.513	293.9	71.3136	320.78	2881.71	311.58	360.542	289.76	91.7568	319.36	2819.43	308.88	339.07	290.42	73.7569
313.36	3322.7	299.12	3058.88	311.3	353.428	298.04	336.214	299.29	88.2403	316.5	2826.66	309.62	361.293	293.91	71.2663	320.79	2879.38	311.59	359.186	289.77	91.6442	319.37	2814.34	308.9	338.715	290.44	73.6932
313.36	3319.49	299.12	3061.8	311.3	353.646	298.05	336.05	299.31	88.1667	316.51	2824.23	309.62	361.609	293.92	71.2096	320.8	2876.63	311.59	359.493	289.79	91.5239	319.37	2816.62	308.91	338.079	290.45	73.6186
313.38	3315.58	299.14	3052.86	311.33	352.749	298.06	335.668	299.31	88.085	316.52	2821.49	309.64	360.696	293.94	71.163	320.81	2874.28	311.59	360.199	289.81	91.422	319.39	2807.88	308.91	337.924	290.46	73.5556
313.38	3312.75	299.14	3055.5	311.33	353.093	298.07	335.304	299.34	88.0114	316.53	2819.01	309.64	361.013	293.95	71.0938	320.82	2871.42	311.61	358.525	289.82	91.3029	319.39	2810.45	308.92	337.67	290.47	73.485
313.4	3309.44	299.16	3046.07	311.34	352.223	298.08	334.995	299.34	87.9261	316.54	2816.46	309.66	359.891	293.96	71.0439	320.83	2868.74	311.61	358.86	289.84	91.2015	319.4	2805.1	308.93	337.369	290.48	73.4267
313.4	3307.09	299.16	3049.21	311.36	352.459	298.09	334.776	299.36	87.8505	316.55	2814.23	309.66	360.235	293.97	70.9804	320.84	2865.53	311.62	357.684	289.85	91.0816	319.41	2802.51	308.95	337.078	290.49	73.3675
313.42	3304.03	299.17	3042.99	311.37	351.679	298.1	334.339	299.36	87.7628	316.56	2811.53	309.67	359.792	293.98	70.9316	320.85	2862.82	311.64	357.494	289.87	90.9753	319.42	2797.47	308.97	336.815	290.51	73.3023
313.41	3302.01	299.18	3040.55	311.38	352.015	298.12	333.966	299.39	87.6935	316.57	2809.19	309.67	359.991	294	70.8728	320.86	2859.9	311.65	357.159	289.89	90.8534	319.42	2799.52	308.98	336.469	290.52	73.225
313.43	3298.93	299.19	3035.15	311.4	350.791	298.13	333.465	299.39	87.6083	316.58	2804.17	309.7	359.258	294	70.8211	320.87	2857.7	311.68	356.661	289.9	90.749	319.44	2793.26	308.99	336.305	290.53	73.1546
313.43	3296.62	299.19	3037.54	311.4	351.172	298.15	333.156	299.41	87.5354	316.58	2806.45	309.7	359.575	294.02	70.759	320.88	2855	311.68	356.878	289.92	90.6267	319.44	2795.63	309.01	335.841	290.54	73.0838
313.45	3293.85	299.2	3032.5	311.43	350.156	298.17	332.855	299.42	87.4489	316.59	2801.4	309.74	358.525	294.03	70.7066	320.89	2853.07	311.7	356.408	289.93	90.5212	319.46	2786.5	309.02	335.705	290.56	73.0094
313.45	3291.59	299.21	3030.19	311.43	350.464	298.19	332.618	299.44	87.3765	316.6	2799.23	309.74	358.842	294.04	70.6441	320.9	2847.86	311.71	355.955	289.95	90.4005	319.46	2790.04	309.04	335.568	290.57	72.9376
313.47	3288.42	299.22	3027.42	311.46	349.839	298.2	332.336	299.44	87.2904	316.61	2796.3	309.75	358.236	294.05	70.6007	320.9	2850.04	311.71	356.109	289.96	90.2922	319.47	2783.63	309.05	335.313	290.58	72.8646
313.47	3286.2	299.23	3022.03	311.47	349.54	298.21	332.036	299.46	87.2183	316.62	2790.92	309.76	358	294.06	70.5486	320.92	2843.5	311.73	355.81	289.98	90.1686	319.48	2781.59	309.06	334.894	290.59	72.7978
313.49	3283.01	299.23	3024.93	311.49	349.322	298.22	331.762	299.47	87.1314	316.62	2793.89	309.78	356.752	294.07	70.4995	320.92	2845.36	311.74	355.475	290	90.0635	319.49	2778.68	309.07	334.64	290.6	72.7418
313.5	3280.72	299.24	3019.68	311.5	349.159	298.23	331.553	299.49	87.0573	316.63	2788.62	309.79	356.072	294.09	70.4424	320.93	2841.09	311.75	354.832	290.02	89.9451	319.5	2776.4	309.08	334.312	290.62	72.6763
313.51	3277.85	299.25	3016.76	311.52	349.159	298.24	331.279	299.5	86.9688	316.64	2785.99	309.79	357.195	294.1	70.3953	320.94	2839.23	311.75	355.131	290.03	89.8459	319.51	2773.64	309.09	334.075	290.63	72.6172
313.52	3275.58	299.26	3014.27	311.52	349.395	298.25	331.006	299.52	86.8959	316.65	2781.02	309.8	356.38	294.11	70.3382	320.95	2834.39	311.77	354.615	290.05	89.7291	319.52	2771.14	309.09	333.893	290.64	72.5557
313.53	3272.71	299.27	3011.42	311.53	348.832	298.25	330.633	299.52	86.815	316.65	2783.8	309.81	355.502	294.12	70.2887	320.95	2836.68	311.78	354.425	290.06	89.6312	319.53	2768.22	309.1	333.593	290.65	72.5
313.54	3270.38	299.28	3005.39	311.53	348.959	298.26	330.387	299.54	86.7425	316.66	2778.15	309.82	355.738	294.13	70.2352	320.96	2831.64	311.8	354.071	290.08	89.5128	319.54	2765.82	309.09	333.156	290.67	72.4349
313.55	3267.69	299.28	3008.82	311.54	348.388	298.27	330.104	299.55	86.6348	316.67	2775.1	309.83	354.995	294.14	70.1888	320.97	2829.49	311.81	353.709	290.09	89.4148	319.55	2762.64	309.1	332.919	290.68	72.3788
313.56	3265.06	299.29	3002.85	311.54	348.624	298.27	329.74	299.57	86.5639	316.68	2769.91	309.84	355.221	294.15	70.1411	320.98	2827.01	311.83	352.966	290.11	89.302	319.56	2760.32	309.1	332.591	290.69	72.3196
313.57	3262.35	299.3	2999.76	311.56	347.517	298.29	329.357	299.57	86.4822	316.68	2772.76	309.86	354.741	294.16	70.0962	320.99	2824.78	311.83	353.256	290.12	89.208	319.57	2755.84	309.12	332.318	290.7	72.2648
313.58	3259.82	299.31	2997.58	311.56	347.88	298.3	329.138	299.59	86.4133	316.7	2765.04	309.87	354.588	294.18	70.0265	321	2819.93	311.86	352.286	290.14	89.0936	319.57	2757.87	309.12	332.017	290.72	72.1847
313.59	3256.36	299.32	2994.77	311.58	346.673	298.31	328.846	299.6	86.3324	316.7	2767.72	309.89	354.28	294.19	69.9805	321	2822.21	311.86	352.576	290.16	88.9976	319.59	2751.13	309.14	331.781	290.73	72.1302
313.6	3254.05	299.33	2992.06	311.59	346.392	298.32	328.637	299.62	86.2579	316.72	2760.14	309.9	354.071	294.2	69.9241	321.02	2815.8	311.87	351.879	290.17	88.9136	319.59	2753.21	309.15	331.443	290.74	72.0679
313.61	3250.87	299.34	2989.66	311.6	346.101	298.34	328.354	299.63	86.1677	316.72	2762.93	309.93	353.627	294.21	69.8777	321.02	2818.23	311.88	351.552	290.19	88.8176	319.6	2746.01	309.17	331.407	290.75	72.012
313.61	3248.58	299.35	2984.54	311.62	345.82	298.35	328.099	299.65	86.0952	316.74	2754.8	309.93	353.881	294.22	69.822	321.04	2810.93	311.89	351.172	290.2	88.7119	319.6	2748.39	309.18	331.161	290.77	71.9485
313.63	3245.89	299.35	2987.34	311.64	345.366	298.36	327.743	299.65	86.007	316.74	2757.6	309.95	352.749	294.23	69.7775	321.04	2813.08	311.9	350.918	290.21	88.6171	319.62	2740.71	309.21	331.034	290.78	71.898
313.64	3243.51	299.37	2979.63	311.66	345.157	298.38	327.534	299.67	85.9434	316.76	2749.94	309.95	353.129	294.24	69.7225	321.06	2807.06	311.92	350.61	290.23	88.5063	319.62	2743.09	309.22	330.742	290.79	71.8338
313.65	3240.98	299.37	2982.32	311.67	344.912	298.38	327.214	299.68	85.8584	316.76	2752.66	309.97	352.078	294.25	69.6768	321.06	2808.56	311.94	350.12	290.25	88.4126	319.64	2735.94	309.23	330.532	290.8	71.7794
313.66	3238.5	299.38	2977.2	311.69	344.676	298.4	327.16	299.7	85.7791	316.78	2745.24	309.97	352.395	294.27	69.6265	321.07	2804.58	311.94	350.32	290.26	88.3054	319.64	2738.13	309.25	330.013	290.81	71.7159
313.67	3235.31	299.39	2974.4	311.7	344.495	298.41	326.859	299.71	85.6985	316.78	2747.73	309.98	351.77	294.28	69.5784	321.08	2802.42	311.96	349.966	290.28	88.2105	319.65	2730.95	309.25	329.247	290.82	71.656
313.67	3232.43	299.4	2972.11	311.72	343.768	298.42	326.558	299.72	85.6296	316.8	2740.32	309.99	351.507	294.29	69.5237	321.09	2799.65	311.98	349.603	290.29	88.1045	319.65	2733.19	309.27	328.627	290.84	71.5904
313.69	3228.93	299.41	2969.34	311.72	344.277	298.45	326.266	299.73	85.547	316.8	2743.05	310	351.145	294.3	69.4644	321.1	2797.2	311.99	349.649	290.31	88.0104	319.67	2725.99	309.27	327.642	290.85	71.5356
313.69	3226.31	299.42	2967.2	311.73	343.432	298.45	326.065	299.74	85.4701	316.81	2737.71	310.01	350.891	294.32	69.4108	321.11	2794.19	312.01	348.986	290.32	87.8976	319.67	2728.22	309.28	327.305	290.86	71.4717
313.71	3223.37	299.43	2964.49	311.74	342.978	298.48	325.709	299.76	85.3839	316.82	2735.12	310.02	350.719	294.33	69.3648	321.12	2791.56	312.01	349.277	290.34	87.8003	319.68	2723.5	309.27	327.013	290.87	71.4155
313.71	3221.01	299.44	2959.85	311.75	342.66	298.48	325.509	299.77	85.3218	316.83	2730.2	310.04	350.492	294.34	69.3084	321.13	2786.19	312.02	348.506	290.35	87.7143	319.69	2721.67	309.29	326.713	290.89	71.3516
313.72	3217.9	299.44	2962.36	311.76	342.251	298.51	325.353	299.78	85.2388	316.83	2732.76	310.05	350.165	294.35	69.2641	321.13	2788.58	312.02	348.678	290.37	87.617	319.7	2719.35	309.29	326.476	290.9	71.2942
313.73	3215.43	299.45	2957.73	311.78	341.96	298.52	324.989	299.8	85.1703	316.84	2728	310.07	349.884	294.36	69.2106	321.15	2780.91	312.03	348.243	290.38	87.4877	319.71	2717.08	309.31	326.412	290.91	71.2268
313.74	3212.3	299.46	2955.47	311.79	341.506	298.54	324.706	299.81	85.097	316.85	2725.46	310.08	349.494	294.37	69.1671	321.15	2783.37	312.04	347.68	290.4	87.3904	319.72	2714.37	309.32	326.658	290.92	71.1705
313.75	3210.28	299.47	2950.72	311.8	341.215	298.55	324.414	299.82	85.0288	316.86	2723.36	310.1	348.823	294.38	69.112	321.17	2775.56	312.04	347.998	290.41	87.2815	319.73	2711.94	309.34	326.685	290.94	71.1066
313.76	3207.73	299.47	2953.42	311.81	340.897	298.56	324.049	299.84	84.9502	316.87	2720.8	310.1	349.259	294.39	69.067	321.17	2777.91	312.05	346.855	290.42	87.187	319.74	2708.94	309.35	327.014	290.95	71.0539
313.77	3205.63	299.48	2948.51	311.82	340.606	298.57	323.729	299.85	84.8833	316.88	2718.71	310.12	347.952	294.41	69.0131	321.18	2772.67	312.05	347.1	290.44	87.0801	319.75	2703.63	309.37	326.74	290.96	70.9886
313.78	3202.94	299.49	2946.11	311.83	340.116	298.57	323.391	299.87	84.8051	316.89	2716.17	310.12	348.469	294.42	68.9638	321.19	2770.17	312.06	346.601	290.46	86.9803	319.75	2706.52	309.38	326.503	290.97	70.9308
313.79	3200.66	299.5	2941.5	311.83	340.388	298.58	323.163	299.88	84.7374	316.9	2711.28	310.13	347.245	294.43	68.9099	321.2	2765.67	312.07	346.265	290.47	86.8658	319.76	2701.36	309.4	326.293	290.99	70.858
313.8	3197.65	299.5	2944.09	311.84	339.816	298.58	322.816	299.89	84.6536	316.9	2714.08	310.14	346.746	294.44	68.8678	321.2	2767.63	312.08	345.992	290.48	86.7725	319.77	2698.67	309.41	326.302	291	70.8027
313.81	3195.22	299.51	2939.36	311.84	339.961	298.59	322.378	299.9	84.5802	316.91	2709.12	310.14	347.635	294.45	68.8045	321.22	2760.98	312.09	345.693	290.5	86.6627	319.78	2695.98	309.42	326.175	291.01	70.7388
313.82	3192.77	299.52	2936.97	311.85	339.588	298.59	321.986	299.92	84.5008	316.92	2706.71	310.15	346.228	294.46	68.7588	321.22	2763.17	312.11	345.348	290.52	86.5694	319.79	2690.09	309.42	325.828	291.02	70.6839
313.83	3190.38	299.53	2931.77	311.86	339.316	298.61	321.739	299.93	84.4362	316.93	2704.62	310.15	346.474	294.48	68.7098	321.23	2758.46	312.12	344.885	290.53	86.4624	319.79	2692.32	309.42	325.481	291.04	70.6179
313.84	3186.91	299.53	2934.72	311.87	339.079	298.61	321.428	299.94	84.3544	316.94	2701.99	310.15	347.027	294.49	68.6699	321.24	2756.1	312.14	344.576	290.55	86.3775	319.8	2687.64	309.43	325.153	291.05	70.5629
313.85	3184.62	299.55	2926.95	311.89	338.943	298.63	321.228	299.96	84.2859	316.95	2699.64	310.16	346.002	294.5	68.6238	321.25	2750.76	312.15	344.24	290.56	86.2702	319.81	2685.68	309.43	324.788	291.06	70.5026
313.86	3181.9	299.55	2929.57	311.91	338.706	298.64	320.926	299.97	84.2024	316.96	2697.12	310.18	345.666	294.51	68.577	321.25	2752.85	312.17	344.041	290.57	86.1828	319.82	2683.04	309.43	324.496	291.07	70.4563
313.87	3179.34	299.57	2921.83	311.92	338.497	298.66	320.716	299.98	84.1367	316.97	2694.92	310.19	345.43	294.52	68.5209	321.27	2745.87	312.18	343.804	290.59	86.0842	319.83	2677.95	309.44	324.14	291.09	70.3974
313.88	3176.53	299.57	2924.66	311.95	337.915	298.67	320.387	299.99	84.0617	316.98	2692.45	310.21	345.112	294.53	68.4744	321.27	2748.06	312.19	343.541	290.6	85.9989	319.83	2680.42	309.45	323.665	291.1	70.3447
313.88	3174.6	299.59	2916.79	311.95	338.161	298.69	320.186	300.01	83.9939	316.99	2690.29	310.22	344.858	294.54	68.4309	321.29	2741.2	312.2	343.114	290.62	85.9011	319.84	2676.01	309.47	323.255	291.11	70.2843
313.9	3171.79	299.59	2919.32	311.98	337.561	298.7	319.903	300.02	83.9149	317	2687.36	310.24	344.594	294.55	68.3877	321.29	2743.32	312.21	342.633	290.63	85.8146	319.85	2673.89	309.48	323.154	291.12	70.2351
313.9	3169.84	299.6	2912.19	311.98	337.633	298.72	319.711	300.03	83.8451	317.01	2682.55	310.25	344.313	294.56	68.3431	321.31	2736.91	312.21	342.914	290.64	85.714	319.86	2672	309.5	322.953	291.13	70.1723
313.91	3167.34	299.6	2914.77	312.01	337.097	298.72	319.419	300.04	83.7697	317.01	2684.98	310.27	343.813	294.57	68.298	321.31	2738.85	312.22	342.387	290.66	85.6226	319.87	2669.71	309.51	322.707	291.14	70.117
313.92	3165.06	299.62	2907.76	312.01	337.379	298.73	319.145	300.06	83.7043	317.02	2680.57	310.29	343.15	294.58	68.2404	321.32	2734.59	312.24	342.033	290.67	85.5272	319.88	2665.55	309.53	322.579	291.16	70.0523
313.93	3162.13	299.62	2910.09	312.02	336.56	298.73	318.88	300.07	83.6297	317.03	2677.97	310.29	343.55	294.59	68.1958	321.33	2732.43	312.25	341.442	290.69	85.4391	319.88	2667.79	309.54	322.296	291.17	70.0006
313.94	3160.07	299.64	2903.17	312.02	336.714	298.74	318.624	300.08	83.5611	317.04	2676.01	310.3	342.796	294.6	68.145	321.34	2729.65	312.25	341.815	290.7	85.3345	319.89	2663.61	309.55	321.921	291.18	69.9363
313.95	3156.89	299.64	2905.63	312.04	335.996	298.74	318.423	300.09	83.5045	317.05	2673.63	310.32	342.36	294.61	68.1022	321.35	2727.6	312.27	341.252	290.72	85.2507	319.9	2661.16	309.55	321.584	291.19	69.8849
313.96	3154.46	299.65	2897.84	312.04	336.241	298.75	318.212	300.11	83.4363	317.06	2668.79	310.33	341.951	294.63	68.0564	321.36	2724.2	312.28	341.079	290.73	85.1489	319.91	2658.83	309.55	321.282	291.2	69.8317
313.97	3151.44	299.65	2900.51	312.06	335.432	298.75	317.911	300.12	83.3557	317.06	2671.49	310.34	341.306	294.64	68.0121	321.36	2725.99	312.29	340.797	290.75	85.0571	319.92	2656.48	309.56	321.154	291.21	69.78
313.98	3149.03	299.66	2895.74	312.06	335.759	298.76	317.646	300.14	83.2903	317.08	2664.05	310.35	340.97	294.65	67.9617	321.38	2718.58	312.31	339.87	290.76	84.9268	319.93	2651.87	309.57	320.926	291.22	69.7211
313.99	3146.35	299.67	2892.92	312.08	335.049	298.77	317.308	300.15	83.214	317.08	2666.47	310.37	340.579	294.66	67.9195	321.38	2720.71	312.31	340.434	290.78	84.839	319.93	2654.51	309.57	320.698	291.24	69.6747
314	3144.31	299.68	2889.24	312.09	334.813	298.79	317.152	300.16	83.1482	317.09	2662.09	310.38	340.297	294.68	67.886	321.4	2714.1	312.31	340.615	290.79	84.7356	319.94	2649.61	309.58	320.406	291.25	69.6204
314	3141.54	299.68	2891.43	312.11	334.248	298.81	316.86	300.17	83.078	317.1	2659.69	310.39	339.979	294.69	67.8388	321.4	2715.97	312.33	339.216	290.81	84.643	319.95	2647.23	309.59	320.278	291.26	69.5722
314.01	3139.64	299.69	2886.89	312.11	334.567	298.83	316.594	300.19	83.0022	317.11	2655.16	310.4	339.807	294.7	67.7837	321.41	2711.6	312.33	340.17	290.82	84.5391	319.96	2645.29	309.61	320.086	291.27	69.514
314.02	3136.98	299.7	2884.34	312.14	333.939	298.85	316.256	300.2	82.9231	317.11	2657.58	310.41	339.607	294.71	67.7373	321.42	2708.74	312.34	339.479	290.84	84.4489	319.97	2642.7	309.62	319.876	291.28	69.4695
314.03	3135.17	299.71	2880.32	312.15	333.675	298.86	315.991	300.21	82.8585	317.12	2653.3	310.41	339.634	294.72	67.6792	321.43	2704.3	312.35	338.579	290.85	84.3439	319.98	2640.71	309.63	319.483	291.3	69.4123
314.04	3132.63	299.71	2882.45	312.16	333.256	298.88	315.781	300.22	82.7802	317.13	2650.8	310.42	339.361	294.73	67.6335	321.43	2706.16	312.36	338.788	290.87	84.2516	319.99	2638.38	309.64	319.3	291.31	69.3641
314.05	3130.89	299.73	2876.34	312.18	333.056	298.9	315.543	300.24	82.7108	317.14	2648.61	310.43	339.479	294.74	67.5787	321.45	2701.05	312.37	337.997	290.88	84.1449	320	2636.33	309.65	318.944	291.32	69.3145
314.06	3128.32	299.73	2878.64	312.19	332.5	298.92	315.296	300.25	82.6301	317.15	2646.24	310.44	339.197	294.75	67.5351	321.45	2702.52	312.37	338.27	290.9	84.0543	320.01	2634.15	309.66	318.715	291.33	69.2623
314.07	3126.01	299.74	2874.14	312.19	332.7	298.93	314.976	300.26	82.5655	317.16	2643.79	310.44	339.361	294.76	67.49	321.46	2699.15	312.39	337.651	290.91	83.9516	320.02	2629.75	309.67	318.258	291.34	69.1998
314.08	3122.69	299.75	2871.55	312.21	331.835	298.93	314.692	300.28	82.4869	317.17	2641.16	310.46	339.016	294.77	67.4475	321.47	2697.54	312.4	337.47	290.93	83.8674	320.02	2632.18	309.68	318.039	291.35	69.1509
314.09	3120.1	299.76	2866.59	312.21	332.099	298.95	314.39	300.29	82.415	317.18	2636.77	310.47	338.797	294.78	67.4003	321.48	2695.44	312.41	337.588	290.94	83.7455	320.04	2625.07	309.7	317.701	291.37	69.0462
314.1	3117.48	299.76	2869.31	312.23	331.179	298.95	314.043	300.3	82.3516	317.18	2639.26	310.48	338.47	294.79	67.3563	321.49	2690.95	312.43	337.297	290.96	83.6637	320.04	2627.69	309.71	317.536	291.37	69.094
314.11	3114.94	299.77	2864.17	312.23	331.443	298.97	313.841	300.31	82.287	317.19	2634.58	310.5	338.024	294.8	67.3069	321.49	2693.46	312.44	337.033	290.97	83.5682	320.05	2622.91	309.73	317.353	291.39	68.9883
314.12	3112.91	299.78	2861.2	312.24	330.541	298.97	313.539	300.33	82.2071	317.2	2631.91	310.51	337.642	294.81	67.2611	321.5	2689.6	312.47	336.805	290.99	83.4799	320.06	2620.58	309.73	316.951	291.4	68.9383
314.12	3110.43	299.79	2858.85	312.24	330.851	298.98	313.347	300.34	82.1408	317.21	2627.2	310.52	337.388	294.83	67.2229	321.51	2687.22	312.48	336.614	291	83.3792	320.07	2616.54	309.75	316.732	291.41	68.8854
314.13	3106.77	299.8	2856.18	312.26	330.277	298.99	313.109	300.35	82.061	317.21	2629.84	310.54	336.751	294.83	67.1814	321.52	2685.05	312.5	336.442	291.02	83.2926	320.07	2618.65	309.75	316.503	291.42	68.8365
314.14	3103.95	299.81	2851.13	312.27	329.74	298.99	312.844	300.36	81.9959	317.23	2622.56	310.54	337.042	294.85	67.1328	321.53	2682.24	312.51	336.214	291.03	83.1979	320.08	2614.71	309.77	315.982	291.43	68.7839
314.15	3100.52	299.81	2854.03	312.27	330.004	299	312.606	300.37	81.9224	317.23	2625.2	310.56	336.232	294.86	67.0924	321.54	2680.07	312.53	335.859	291.04	83.1136	320.09	2612.49	309.77	315.534	291.44	68.7379
314.16	3097.82	299.82	2848.93	312.29	329.493	299	312.478	300.38	81.861	317.24	2620.45	310.56	336.487	294.87	67.0459	321.55	2675.55	312.55	335.195	291.06	83.0149	320.1	2610.75	309.78	315.277	291.46	68.6375
314.17	3094.76	299.83	2846.17	312.3	329.266	299.01	312.249	300.4	81.7915	317.25	2617.97	310.57	335.85	294.88	67.0008	321.55	2677.75	312.56	335.004	291.07	82.9282	320.11	2608.58	309.79	315.021	291.46	68.6817
314.18	3092.24	299.84	2843.78	312.32	329.065	299.01	311.993	300.41	81.7301	317.26	2613.39	310.58	335.686	294.89	66.9774	321.56	2672.77	312.57	334.74	291.08	82.8375	320.12	2606.86	309.8	314.884	291.48	68.5892
314.19	3089	299.85	2840.96	312.33	328.783	299.02	311.636	300.42	81.6554	317.26	2615.88	310.59	335.504	294.9	66.9351	321.57	2670.46	312.59	334.139	291.1	82.7552	320.13	2602.91	309.81	314.582	291.49	68.5421
314.2	3086.55	299.86	2835.89	312.35	328.609	299.03	311.398	300.43	81.5884	317.28	2608.89	310.6	335.222	294.91	66.8782	321.58	2667.8	312.59	334.631	291.11	82.6742	320.13	2604.79	309.83	314.537	291.5	68.4884
314.21	3084.1	299.86	2838.46	312.37	328.336	299.04	311.178	300.44	81.5185	317.28	2611.3	310.61	334.922	294.92	66.8338	321.59	2663.22	312.6	333.502	291.12	82.5823	320.14	2600.55	309.83	314.171	291.51	68.4496
314.22	3082.02	299.87	2833.68	312.38	328.099	299.06	311.059	300.46	81.4554	317.29	2607.06	310.63	334.676	294.93	66.7876	321.59	2665.74	312.6	333.911	291.14	82.4907	320.15	2598.44	309.85	314.216	291.52	68.3923
314.23	3079.55	299.88	2831	312.4	327.743	299.08	310.692	300.47	81.3819	317.3	2604.55	310.64	334.321	294.94	66.7461	321.61	2658.7	312.61	332.892	291.16	82.4056	320.16	2596.2	309.86	314.18	291.53	68.3394
314.24	3077.47	299.89	2826.16	312.41	327.515	299.09	310.427	300.48	81.3157	317.31	2600.13	310.65	334.039	294.95	66.7003	321.61	2661.36	312.61	333.238	291.17	82.3037	320.17	2594.2	309.87	313.96	291.54	68.2843
314.24	3074.68	299.89	2828.68	312.43	327.05	299.11	310.235	300.49	81.2361	317.31	2602.53	310.67	333.72	294.97	66.6624	321.62	2653.55	312.62	332.363	291.18	82.2254	320.18	2590.4	309.88	313.695	291.55	68.2357
314.25	3072.3	299.9	2824.01	312.43	327.26	299.12	310.134	300.51	81.1727	317.33	2596.33	310.68	333.411	294.97	66.6011	321.62	2656.28	312.62	332.746	291.2	82.1263	320.18	2591.85	309.89	313.173	291.56	68.1784
314.26	3069.82	299.91	2821.33	312.45	326.512	299.14	309.933	300.52	81.1012	317.33	2598.31	310.69	333.001	294.99	66.5549	321.64	2648.29	312.63	331.981	291.21	82.0367	320.19	2588.07	309.89	312.963	291.57	68.1309
314.27	3067.64	299.92	2819.12	312.45	326.767	299.15	309.63	300.53	81.0401	317.34	2594.47	310.7	332.773	294.99	66.5044	321.64	2651.24	312.64	331.489	291.23	81.9368	320.2	2586.18	309.9	312.359	291.58	68.0776
314.28	3064.69	299.93	2814.47	312.47	326.001	299.16	309.3	300.54	80.9658	317.35	2592	310.71	332.363	295.01	66.4654	321.65	2645.89	312.64	331.671	291.24	81.8589	320.21	2581.9	309.91	312.304	291.59	68.0301
314.29	3062.84	299.93	2816.68	312.47	326.22	299.16	309.071	300.55	80.9031	317.36	2589.91	310.72	331.963	295.02	66.4181	321.66	2643.09	312.66	331.279	291.26	81.7593	320.21	2584	309.91	312.02	291.61	67.9256
314.29	3060.46	299.94	2811.8	312.48	325.81	299.17	308.815	300.57	80.8264	317.37	2587.7	310.72	332.181	295.03	66.3752	321.67	2640.74	312.67	331.097	291.27	81.6754	320.22	2579.3	309.92	311.81	291.61	67.9742
314.3	3058.03	299.95	2807.08	312.48	325.928	299.18	308.613	300.58	80.7653	317.38	2583.11	310.73	331.771	295.04	66.3225	321.68	2638.38	312.69	330.842	291.29	81.5822	320.23	2577.06	309.93	311.526	291.63	67.8723
314.31	3055.22	299.95	2809.72	312.49	325.49	299.18	308.219	300.59	80.6722	317.38	2585.57	310.74	331.726	295.05	66.2817	321.69	2632.68	312.71	330.523	291.3	81.4927	320.24	2575	309.94	311.379	291.64	67.8222
314.32	3053.04	299.96	2805.05	312.5	325.208	299.2	307.917	300.6	80.6115	317.4	2578.86	310.75	331.653	295.06	66.2351	321.69	2636.29	312.72	330.232	291.32	81.4019	320.25	2573.4	309.95	311.132	291.65	67.7621
314.33	3050.48	299.97	2802.75	312.51	325.463	299.21	307.578	300.61	80.5392	317.4	2581.19	310.76	331.462	295.07	66.1958	321.71	2627.65	312.74	329.976	291.33	81.3244	320.26	2571.13	309.96	310.976	291.66	67.713
314.34	3048.4	299.98	2800.49	312.52	325.235	299.22	307.468	300.62	80.4761	317.41	2577	310.78	331.243	295.08	66.1463	321.71	2630.29	312.76	329.703	291.35	81.1573	320.27	2569.73	309.97	310.748	291.67	67.6565
314.35	3045.75	299.99	2797.78	312.53	324.879	299.23	307.239	300.64	80.4074	317.42	2574.56	310.79	331.106	295.09	66.1026	321.73	2622.88	312.79	328.828	291.35	81.234	320.28	2567.34	309.98	310.546	291.68	67.6053
314.36	3043.52	300	2794.72	312.56	324.085	299.26	306.918	300.65	80.3483	317.43	2570.26	310.8	330.952	295.1	66.0373	321.73	2625.4	312.79	329.038	291.37	81.0645	320.29	2565.47	309.99	310.253	291.69	67.5487
314.37	3040.5	300.01	2789.7	312.56	324.633	299.27	306.57	300.66	80.2716	317.43	2572.56	310.81	330.797	295.11	66.0008	321.74	2617.6	312.79	329.339	291.38	80.9854	320.3	2560.86	310.01	310.07	291.7	67.5008
314.38	3037.91	300.01	2791.82	312.59	323.775	299.29	306.332	300.67	80.2105	317.44	2568.3	310.83	330.15	295.12	65.9593	321.74	2620.46	312.8	327.552	291.4	80.8946	320.3	2562.86	310.02	309.978	291.72	67.3966
314.38	3034.84	300.02	2787.3	312.6	323.245	299.31	306.139	300.69	80.1369	317.45	2565.88	310.83	330.551	295.13	65.9217	321.76	2612.78	312.8	327.944	291.41	80.8155	320.31	2558.6	310.03	309.722	291.72	67.4496
314.4	3032.57	300.03	2785.17	312.6	323.501	299.32	305.919	300.7	80.0743	317.46	2564	310.85	329.913	295.15	65.8773	321.76	2615.4	312.8	328.263	291.43	80.65	320.32	2556.64	310.04	309.456	291.74	67.3418
314.4	3030	300.04	2779.76	312.61	322.159	299.33	305.736	300.71	80.0071	317.47	2561.58	310.86	329.721	295.16	65.8412	321.78	2607.57	312.8	328.518	291.43	80.7263	320.33	2554.21	310.06	309.218	291.75	67.2964
314.41	3027.04	300.04	2782.32	312.61	322.424	299.33	305.479	300.73	79.9485	317.48	2557.34	310.87	329.512	295.17	65.7996	321.78	2610.58	312.81	327.816	291.45	80.5636	320.34	2549.38	310.07	308.971	291.76	67.2405
314.42	3023.61	300.05	2777.1	312.62	321.602	299.34	305.121	300.74	79.8785	317.48	2559.8	310.88	329.193	295.18	65.7566	321.79	2602.16	312.82	327.342	291.46	80.4865	320.34	2551.99	310.09	308.76	291.77	67.2006
314.43	3021.08	300.06	2774.96	312.62	321.858	299.36	304.975	300.75	79.8186	317.49	2555.35	310.9	328.91	295.19	65.7057	321.79	2605.06	312.83	327.078	291.48	80.4033	320.35	2547.51	310.1	308.512	291.78	67.1468
314.44	3018.18	300.07	2770.45	312.64	321.109	299.36	304.837	300.76	79.7495	317.5	2553.2	310.91	328.618	295.2	65.6703	321.81	2596.89	312.85	326.567	291.49	80.3225	320.36	2545.07	310.11	308.256	291.79	67.1003
314.45	3015.89	300.07	2772.46	312.64	321.365	299.37	304.626	300.77	79.686	317.51	2551	310.92	328.491	295.21	65.6208	321.81	2599.79	312.85	326.85	291.5	80.2289	320.37	2541.63	310.13	307.78	291.8	67.0455
314.46	3012.53	300.08	2768.09	312.65	320.853	299.37	304.342	300.79	79.6052	317.52	2548.58	310.93	328.017	295.22	65.5793	321.83	2592.31	312.86	326.33	291.51	80.1473	320.37	2542.9	310.14	307.55	291.81	67.0004
314.47	3010.37	300.09	2766.23	312.66	320.661	299.39	304.186	300.8	79.5453	317.53	2544.48	310.93	328.263	295.23	65.5334	321.83	2594.73	312.87	326.138	291.53	80.0541	320.38	2539.9	310.15	307.266	291.82	66.9506
314.47	3006.92	300.1	2762.35	312.68	320.415	299.39	303.984	300.81	79.4742	317.53	2546.72	310.94	327.269	295.24	65.4925	321.84	2588.09	312.88	325.837	291.54	79.9797	320.39	2537.72	310.16	307.028	291.83	66.9066
314.49	3004.7	300.1	2764.22	312.69	320.159	299.42	303.736	300.82	79.4114	317.55	2540.18	310.94	327.552	295.25	65.4485	321.84	2589.68	312.9	325.572	291.56	79.8957	320.4	2536.03	310.17	306.689	291.84	66.8507
314.49	3002.58	300.11	2760.14	312.72	319.839	299.41	303.415	300.83	79.3387	317.55	2542.44	310.94	327.761	295.26	65.4095	321.86	2583.94	312.91	325.363	291.57	79.8218	320.41	2532.2	310.18	306.46	291.86	66.8027
314.5	3000.67	300.12	2758.13	312.72	319.949	299.43	303.168	300.84	79.2788	317.56	2538.12	310.95	326.685	295.27	65.3715	321.86	2586.09	312.93	324.87	291.59	79.7326	320.41	2533.82	310.18	305.937	291.87	66.7468
314.51	2998.22	300.13	2755.83	312.74	319.666	299.43	302.846	300.85	79.2129	317.57	2535.99	310.95	327.032	295.28	65.3346	321.87	2582.82	312.93	325.071	291.6	79.6618	320.42	2530.02	310.19	305.167	291.88	66.6996
314.52	2996.33	300.14	2753.76	312.75	319.062	299.45	302.617	300.87	79.1501	317.58	2532.11	310.96	326.503	295.29	65.2905	321.88	2580.29	312.96	324.697	291.62	79.5782	320.43	2528.18	310.19	304.855	291.89	66.6436
314.53	2993.51	300.15	2749.54	312.75	319.419	299.45	302.287	300.88	79.0769	317.58	2534.02	310.97	326.311	295.3	65.2508	321.89	2576.07	312.97	324.532	291.63	79.5042	320.44	2525.83	310.19	304.69	291.9	66.5974
314.54	2991.46	300.15	2751.46	312.77	318.468	299.46	302.002	300.89	79.0146	317.59	2530.31	310.99	326.038	295.31	65.1868	321.89	2578.32	312.99	324.213	291.64	79.413	320.45	2523.71	310.2	304.516	291.91	66.5422
314.55	2988.64	300.16	2745.28	312.77	318.843	299.47	301.589	300.9	78.9439	317.6	2528.07	311	325.709	295.32	65.1482	321.91	2571.39	313	323.939	291.66	79.3366	320.46	2521.32	310.2	304.323	291.92	66.4975
314.56	2986.28	300.16	2747.13	312.79	318.267	299.48	301.369	300.92	78.8851	317.61	2526.3	311.02	325.436	295.33	65.1091	321.91	2574.05	313.01	323.601	291.67	79.2353	320.47	2517.57	310.21	304.076	291.93	66.4473
314.56	2983.01	300.18	2740.97	312.8	317.984	299.5	301.222	300.93	78.818	317.62	2522.19	311.03	325.189	295.34	65.0816	321.92	2569.81	313.02	323.09	291.68	79.1609	320.47	2519.67	310.2	303.819	291.94	66.3961
314.58	2980.63	300.18	2743.03	312.81	317.573	299.5	301.066	300.94	78.7553	317.62	2524.14	311.05	324.961	295.36	65.0422	321.93	2567.49	313.02	323.346	291.7	79.0757	320.48	2515.94	310.21	303.819	291.96	66.3456
314.58	2977.52	300.19	2738.61	312.83	317.116	299.51	300.883	300.95	78.6821	317.63	2520.02	311.06	324.596	295.36	65.0018	321.94	2563.22	313.03	322.579	291.71	79.0029	320.49	2513.93	310.22	304.14	291.97	66.3004
314.6	2975.21	300.2	2736.73	312.84	316.887	299.51	300.69	300.96	78.6262	317.64	2518.16	311.07	324.14	295.38	64.9526	321.94	2565.33	313.04	321.821	291.72	78.9224	320.5	2512.35	310.24	303.782	291.98	66.2456
314.6	2971.94	300.21	2732.67	312.87	316.238	299.54	300.451	300.98	78.5594	317.65	2515.94	311.09	323.894	295.38	64.9135	321.95	2561.6	313.04	322.123	291.74	78.8408	320.51	2510.29	310.24	303.397	291.99	66.199
314.61	2969.76	300.21	2734.39	312.87	316.512	299.54	300.213	300.99	78.5019	317.66	2513.86	311.1	323.693	295.4	64.8766	321.96	2559.54	313.04	322.835	291.75	78.7544	320.52	2505.16	310.26	302.92	292	66.1517
314.61	2966.94	300.22	2730.6	312.9	315.845	299.56	299.983	301	78.4315	317.67	2509.67	311.11	323.501	295.41	64.8408	321.97	2557.78	313.05	321.931	291.76	78.6852	320.52	2507.72	310.27	302.681	292.01	66.1098
314.63	2964.6	300.23	2728.7	312.9	316.064	299.55	299.818	301.01	78.376	317.67	2511.56	311.12	323.264	295.43	64.7967	321.98	2553.54	313.05	322.305	291.78	78.6196	320.53	2503.3	310.29	302.507	292.03	66.056
314.63	2961.74	300.24	2724.71	312.91	315.433	299.57	299.873	301.03	78.3124	317.68	2507.31	311.14	322.807	295.43	64.7573	321.98	2555.49	313.06	321.62	291.79	78.5416	320.54	2501.08	310.3	302.305	292.04	66.0098
314.65	2959.34	300.24	2726.45	312.91	315.589	299.57	299.607	301.04	78.2549	317.69	2505.47	311.14	322.99	295.45	64.7316	321.99	2551.35	313.07	321.2	291.81	78.4568	320.55	2499.42	310.32	301.993	292.05	65.96
314.65	2956.53	300.25	2722.61	312.92	315.387	299.59	299.634	301.06	78.1886	317.7	2501.21	311.16	322.743	295.45	64.6911	322	2546.79	313.08	321.355	291.82	78.3808	320.56	2497.68	310.32	301.773	292.06	65.917
314.67	2954.69	300.26	2720.69	312.93	315.214	299.6	299.377	301.06	78.1326	317.7	2503.12	311.16	322.752	295.47	64.6567	322	2549.39	313.09	320.743	291.83	78.2922	320.57	2493.81	310.35	301.892	292.08	65.8614
314.67	2952.45	300.27	2716.52	312.94	315.168	299.61	299.147	301.08	78.0655	317.71	2498.93	311.17	322.442	295.47	64.617	322.01	2544.81	313.09	320.963	291.84	78.2162	320.57	2496.22	310.36	301.846	292.09	65.8177
314.68	2950.63	300.27	2718.46	312.95	314.985	299.62	298.982	301.08	78.0063	317.72	2497.09	311.18	321.447	295.49	64.5721	322.02	2542.77	313.12	320.415	291.86	78.1289	320.58	2489.31	310.38	301.534	292.1	65.7685
314.69	2948.16	300.28	2714.27	312.96	314.445	299.63	298.78	301.1	77.9379	317.73	2493.19	311.18	321.931	295.49	64.5334	322.03	2540.9	313.13	320.661	291.87	78.0517	320.58	2491.72	310.39	300.846	292.11	65.7342
314.7	2945.83	300.29	2712.4	312.96	314.674	299.64	298.762	301.11	77.8816	317.73	2495.1	311.18	322.25	295.51	64.4929	322.04	2538.95	313.14	319.949	291.88	77.9644	320.59	2486.73	310.41	300.644	292.13	65.6396
314.71	2942.83	300.3	2710.11	312.98	314.116	299.64	298.1	301.13	77.814	317.74	2491.02	311.19	320.716	295.52	64.457	322.05	2535.48	313.15	320.15	291.9	77.888	320.6	2484.73	310.42	300.414	292.13	65.6844
314.72	2940.59	300.31	2708.32	312.99	313.887	299.65	297.806	301.13	77.7561	317.75	2489.25	311.19	321.182	295.53	64.4194	322.05	2537.35	313.17	319.309	291.91	77.7986	320.61	2481.07	310.44	300.249	292.15	65.538
314.72	2939.07	300.32	2704.09	313.01	313.924	299.66	296.989	301.15	77.6933	317.76	2486.88	311.19	321.776	295.54	64.389	322.06	2534.04	313.17	319.611	291.93	77.7214	320.61	2482.94	310.45	300.065	292.15	65.5857
314.73	2937.41	300.32	2706.07	313.01	314.107	299.67	296.713	301.15	77.6386	317.77	2485.43	311.2	320.469	295.55	64.3391	322.07	2532.24	313.19	318.861	291.94	77.6397	320.63	2477.37	310.45	299.652	292.17	65.4372
314.74	2934.86	300.33	2701.81	313.02	313.512	299.69	296.3	301.17	77.5774	317.78	2481.08	311.21	320.159	295.56	64.2964	322.08	2528.58	313.2	318.532	291.95	77.5697	320.63	2479.45	310.46	299.588	292.17	65.4831
314.75	2933.3	300.34	2697.52	313.02	313.658	299.7	296.088	301.18	77.5191	317.78	2483.18	311.22	320.022	295.57	64.2518	322.08	2530.64	313.21	318.002	291.97	77.4844	320.64	2475.41	310.46	299.469	292.19	65.3874
314.76	2930.81	300.34	2699.78	313.03	313.21	299.72	295.794	301.2	77.445	317.79	2479.45	311.24	319.775	295.58	64.2099	322.1	2524.59	313.22	317.819	291.98	77.4071	320.65	2474.24	310.47	299.707	292.2	65.3458
314.77	2929.61	300.35	2695.66	313.04	313.054	299.73	295.197	301.2	77.3867	317.8	2477.46	311.25	319.583	295.59	64.1621	322.1	2526.64	313.23	317.381	292	77.3158	320.66	2470.81	310.47	299.276	292.22	65.2388
314.78	2927.7	300.36	2693.4	313.06	312.734	299.75	294.792	301.22	77.3227	317.81	2473.37	311.27	319.401	295.6	64.1269	322.11	2522.74	313.24	316.978	292.01	77.2429	320.66	2472.64	310.48	299.083	292.22	65.288
314.79	2925.95	300.37	2691.63	313.06	312.889	299.75	294.544	301.22	77.2659	317.81	2475.14	311.28	319.592	295.62	64.082	322.12	2520.37	313.25	317.198	292.03	77.0775	320.68	2467.24	310.48	298.771	292.24	65.1452
314.79	2923.75	300.38	2687.75	313.08	311.636	299.77	294.277	301.24	77.1963	317.82	2471.16	311.3	319.364	295.62	64.0365	322.13	2518.56	313.27	316.75	292.03	77.1532	320.68	2469.25	310.5	298.514	292.24	65.1911
314.81	2921.73	300.38	2689.72	313.08	311.892	299.77	293.91	301.25	77.1416	317.83	2469.49	311.31	319.163	295.64	63.9995	322.14	2516.26	313.27	316.786	292.06	76.9181	320.69	2465.46	310.5	298.156	292.26	65.0935
314.81	2919.18	300.39	2685.33	313.1	311.004	299.78	293.431	301.26	77.08	317.84	2465.99	311.32	318.925	295.65	63.964	322.15	2514.26	313.29	316.393	292.06	76.9922	320.7	2462.33	310.52	297.751	292.27	65.049
314.82	2917.27	300.4	2680.97	313.1	311.269	299.79	293.054	301.27	77.0233	317.84	2467.54	311.33	318.688	295.66	63.9209	322.16	2512.07	313.29	316.649	292.08	76.8368	320.71	2458.19	310.52	297.577	292.28	64.9955
314.83	2914.65	300.4	2683.43	313.12	310.564	299.78	292.411	301.29	76.9637	317.85	2462.53	311.34	318.276	295.67	63.8833	322.17	2507.27	313.32	316.156	292.09	76.7643	320.71	2460.4	310.54	297.402	292.29	64.95
314.84	2912.64	300.41	2679.2	313.13	310.784	299.82	292.282	301.3	76.911	317.85	2464.1	311.34	318.478	295.68	63.8326	322.17	2510.11	313.33	315.973	292.11	76.6065	320.73	2454.15	310.54	297.154	292.31	64.8556
314.85	2909.88	300.42	2677.26	313.15	310.051	299.81	292.162	301.31	76.8478	317.86	2460.51	311.35	317.947	295.69	63.7935	322.18	2505.49	313.35	315.707	292.11	76.6814	320.73	2456.34	310.56	297.007	292.31	64.8986
314.86	2907.84	300.43	2673.43	313.15	310.335	299.85	291.978	301.32	76.7902	317.87	2458.68	311.36	317.436	295.7	63.7428	322.19	2503.54	313.36	315.433	292.13	76.5192	320.74	2452.41	310.56	296.814	292.33	64.7713
314.86	2905.36	300.43	2675.54	313.16	309.768	299.83	291.785	301.34	76.7181	317.88	2454.85	311.37	317.326	295.71	63.7055	322.2	2498.8	313.37	315.186	292.14	76.4439	320.75	2450.43	310.58	296.603	292.33	64.8093
314.87	2903.36	300.44	2671.65	313.17	309.236	299.87	291.656	301.35	76.661	317.88	2456.53	311.38	317.134	295.72	63.6602	322.2	2501.08	313.38	314.839	292.16	76.2945	320.76	2446.75	310.58	296.594	292.35	64.7015
314.88	2900.9	300.45	2667.7	313.17	309.529	299.86	291.5	301.36	76.5933	317.89	2452.7	311.4	316.869	295.73	63.6211	322.21	2496.89	313.39	314.299	292.16	76.3629	320.76	2448.68	310.59	296.355	292.35	64.7435
314.89	2898.64	300.45	2669.49	313.19	308.659	299.89	291.38	301.37	76.5398	317.9	2450.99	311.41	316.896	295.74	63.5747	322.22	2494.68	313.39	314.601	292.19	76.1435	320.77	2445.2	310.6	296.116	292.37	64.6466
314.9	2895.67	300.46	2666.54	313.19	308.971	299.89	291.353	301.38	76.4871	317.91	2448.74	311.42	316.549	295.75	63.5403	322.23	2492.88	313.41	314.098	292.19	76.216	320.78	2443.11	310.6	295.84	292.38	64.6017
314.91	2893.78	300.47	2662.77	313.21	308.11	299.9	291.086	301.39	76.4275	317.92	2446.95	311.44	316.293	295.76	63.4929	322.24	2490.85	313.42	313.887	292.22	75.9885	320.79	2439.16	310.61	295.528	292.39	64.5514
314.92	2891.61	300.47	2664.88	313.22	308.403	299.9	290.718	301.4	76.3691	317.93	2443.14	311.45	316.082	295.77	63.4425	322.25	2486.45	313.43	313.411	292.22	76.0646	320.79	2441.23	310.62	295.491	292.4	64.5076
314.93	2889.72	300.48	2661.09	313.24	307.752	299.92	290.525	301.41	76.3188	317.93	2444.93	311.47	315.918	295.78	63.3878	322.25	2488.66	313.43	313.649	292.24	75.8979	320.8	2435.04	310.62	295.206	292.41	64.453
314.94	2887.57	300.49	2659.57	313.24	307.972	299.94	290.285	301.43	76.2596	317.94	2440.93	311.48	315.625	295.79	63.3559	322.26	2484.51	313.44	313.247	292.25	75.8226	320.8	2437.38	310.63	294.976	292.42	64.4085
314.94	2885.56	300.5	2655.7	313.27	307.651	299.95	290.092	301.44	76.2016	317.95	2439.16	311.49	315.406	295.81	63.3143	322.27	2482.33	313.45	312.926	292.27	75.7368	320.82	2430.8	310.63	294.195	292.44	64.3184
314.95	2883.16	300.5	2657.81	313.28	307.358	299.96	289.853	301.45	76.1384	317.96	2437.08	311.51	314.665	295.81	63.2722	322.28	2480.37	313.46	312.716	292.28	75.6606	320.82	2433.19	310.64	293.532	292.44	64.3596
314.96	2881.53	300.51	2653.83	313.3	307.166	299.96	289.567	301.46	76.0836	317.97	2433.53	311.51	315.14	295.83	63.2258	322.29	2477.9	313.47	312.185	292.3	75.5007	320.83	2429.03	310.64	293.33	292.46	64.2243
314.97	2878.66	300.52	2651.89	313.31	306.909	299.98	289.227	301.48	76.0216	317.97	2435.5	311.53	314.335	295.83	63.1874	322.3	2473.85	313.48	312.432	292.3	75.5748	320.84	2426.99	310.65	293.174	292.46	64.2703
314.97	2876.38	300.53	2647.89	313.32	306.707	299.98	289.024	301.49	75.9664	317.98	2431.83	311.53	314.701	295.84	63.136	322.3	2475.89	313.49	311.572	292.32	75.4025	320.85	2424.88	310.66	292.944	292.48	64.1425
314.99	2873.77	300.53	2650.04	313.34	306.588	299.99	288.739	301.5	75.8972	317.99	2428.22	311.53	315.031	295.85	63.0961	322.32	2470.22	313.49	311.828	292.33	75.3311	320.86	2421	310.66	292.475	292.48	64.1812
314.99	2871.86	300.54	2646.1	313.35	306.341	299.99	288.49	301.51	75.8404	317.99	2429.95	311.53	314.921	295.86	63.0385	322.32	2472.2	313.5	311.251	292.35	75.2478	320.86	2422.69	310.67	292.254	292.5	64.0487
315.01	2869.25	300.55	2643.88	313.36	305.818	300.01	288.187	301.52	75.7808	318	2426.41	311.53	315.058	295.87	63.003	322.33	2468.86	313.51	310.967	292.36	75.189	320.87	2418.89	310.68	292.07	292.5	64.0936
315.01	2867.19	300.56	2639.57	313.37	306.084	299.99	288.058	301.53	75.7264	318.01	2422.8	311.54	315.04	295.89	62.9537	322.34	2467.06	313.51	311.114	292.38	75.1088	320.88	2417.24	310.69	292.107	292.52	63.9553
315.02	2864.46	300.56	2641.88	313.38	305.461	300.03	287.873	301.54	75.6547	318.01	2424.78	311.55	313.237	295.89	62.9153	322.35	2463.1	313.52	310.537	292.39	75.0403	320.89	2415.74	310.7	292.447	292.52	63.9988
315.02	2862.36	300.58	2636	313.38	305.626	300.02	287.708	301.56	75.5999	318.02	2420.98	311.55	314.472	295.91	62.871	322.35	2465.37	313.52	310.757	292.4	74.9577	320.9	2412.19	310.72	292.199	292.54	63.9032
315.04	2860.05	300.58	2637.78	313.4	305.351	300.05	287.57	301.56	75.5391	318.03	2418.84	311.56	314.125	295.91	62.8322	322.36	2461.43	313.53	310.07	292.41	74.8872	320.9	2414.12	310.73	292.034	292.55	63.8529
315.04	2858.52	300.59	2632.06	313.41	304.892	300.03	287.459	301.58	75.4835	318.04	2417.98	311.57	312.972	295.93	62.7869	322.37	2457.82	313.53	310.317	292.43	74.807	320.91	2410.69	310.75	291.859	292.56	63.8073
315.06	2856.69	300.59	2634.2	313.41	305.213	300.07	287.275	301.58	75.4203	318.05	2415.93	311.58	312.432	295.93	62.7459	322.37	2459.51	313.55	309.685	292.44	74.7366	320.92	2406.8	310.76	291.666	292.57	63.7653
315.06	2854.98	300.6	2630.22	313.42	304.626	300.06	287.054	301.6	75.3659	318.06	2412.24	311.6	311.929	295.95	62.7017	322.38	2455.43	313.55	309.896	292.46	74.5914	320.92	2408.54	310.78	291.389	292.58	63.7174
315.08	2851.59	300.61	2628.1	313.42	304.764	300.08	286.796	301.61	75.3022	318.06	2414.16	311.61	311.69	295.95	62.6589	322.39	2453.25	313.57	309.383	292.46	74.6599	320.93	2402.68	310.79	291.215	292.59	63.6762
315.08	2849.42	300.62	2624.01	313.43	304.443	300.09	286.556	301.63	75.2482	318.08	2408.91	311.63	311.489	295.97	62.619	322.4	2450.95	313.58	309.062	292.48	74.5098	320.93	2404.57	310.81	291.031	292.6	63.6334
315.09	2847.31	300.62	2626.34	313.44	304.149	300.11	286.289	301.63	75.1846	318.08	2410.18	311.65	311.15	295.98	62.5838	322.41	2447.43	313.61	308.888	292.49	74.4366	320.95	2398.77	310.82	290.764	292.61	63.5983
315.09	2844.99	300.63	2622.16	313.46	303.58	300.12	286.096	301.65	75.1334	318.09	2407.25	311.66	310.995	295.99	62.5432	322.41	2449.31	313.62	308.613	292.51	74.2891	320.95	2400.43	310.84	290.552	292.62	63.5501
315.11	2842.99	300.64	2620.23	313.46	303.92	300.13	285.819	301.65	75.0766	318.1	2404.8	311.68	310.812	295.99	62.5069	322.42	2444.3	313.64	308.412	292.51	74.3557	320.96	2393.73	310.85	290.497	292.63	63.5045
315.11	2841.11	300.65	2616.32	313.48	303.269	300.15	285.663	301.67	75.0234	318.11	2401.41	311.69	310.656	296.01	62.4852	322.42	2446.05	313.65	308.146	292.53	74.2136	320.96	2395.72	310.87	290.295	292.64	63.4552
315.12	2838.85	300.65	2618.43	313.49	302.856	300.15	285.515	301.68	74.9626	318.11	2403.25	311.71	310.143	296.01	62.4475	322.43	2442.9	313.67	307.945	292.54	74.1467	320.97	2390.21	310.88	290.083	292.65	63.4146
315.13	2837.19	300.66	2614.47	313.51	302.259	300.17	285.359	301.69	74.9122	318.12	2399.84	311.71	310.381	296.03	62.4123	322.44	2440.12	313.68	307.725	292.56	74.0738	320.97	2392.18	310.88	289.825	292.66	63.3661
315.14	2835.09	300.67	2610.55	313.51	302.617	300.17	285.027	301.7	74.8506	318.13	2397.81	311.73	309.74	296.03	62.3738	322.44	2441.45	313.7	307.294	292.57	74.0073	320.99	2386.26	310.88	289.595	292.67	63.3277
315.14	2833.38	300.67	2612.18	313.52	301.957	300.18	284.732	301.72	74.7994	318.14	2394.14	311.73	309.923	296.05	62.3248	322.45	2438.7	313.7	307.486	292.58	73.9319	320.99	2388.03	310.88	289.264	292.68	63.2853
315.16	2831.5	300.68	2608.55	313.53	301.516	300.19	284.363	301.73	74.7361	318.14	2396.19	311.75	309.346	296.05	62.2867	322.46	2435.59	313.71	306.982	292.6	73.8688	321	2382.96	310.88	289.061	292.69	63.2476
315.16	2829.73	300.69	2604.55	313.53	301.773	300.18	284.216	301.74	74.685	318.15	2392.33	311.75	309.539	296.07	62.2465	322.46	2437.47	313.71	307.138	292.61	73.7949	321	2384.4	310.88	288.785	292.7	63.2066
315.17	2827.3	300.69	2606.71	313.53	302.103	300.21	283.949	301.75	74.6161	318.16	2390.19	311.76	308.375	296.07	62.2124	322.47	2434.39	313.72	306.588	292.62	73.7284	321.02	2379.44	310.88	288.426	292.71	63.1693
315.18	2825.33	300.7	2603.01	313.54	301.305	300.21	283.635	301.76	74.5608	318.17	2388.46	311.76	308.888	296.09	62.1677	322.48	2432.35	313.73	306.359	292.63	73.6717	321.02	2381.12	310.89	288.223	292.72	63.1215
315.19	2823.32	300.71	2600.53	313.54	301.415	300.23	283.396	301.77	74.4992	318.18	2386.74	311.76	309.3	296.09	62.1289	322.49	2430.78	313.73	306.469	292.65	73.6091	321.04	2375.71	310.89	288.067	292.74	63.0421
315.19	2821.28	300.72	2596.53	313.55	301.131	300.23	283.22	301.78	74.4461	318.19	2385.05	311.77	307.981	296.11	62.0886	322.5	2428.65	313.73	306.808	292.66	73.5367	321.04	2377.41	310.9	287.837	292.74	63.0787
315.21	2819.04	300.72	2598.57	313.57	300.919	300.25	283.137	301.79	74.3857	318.2	2383.06	311.77	308.449	296.11	62.0487	322.51	2425.33	313.74	306.029	292.67	73.4717	321.05	2371.93	310.91	287.625	292.76	62.9297
315.21	2817.27	300.73	2594.84	313.59	300.378	300.24	283.082	301.81	74.3352	318.21	2381.49	311.77	308.65	296.13	62.0095	322.51	2427.08	313.75	306.295	292.68	73.3978	321.05	2373.65	310.92	287.468	292.76	62.9982
315.22	2815.24	300.74	2592.86	313.59	300.681	300.27	283.008	301.82	74.2794	318.22	2377.76	311.77	309.108	296.14	61.9765	322.52	2423.74	313.77	305.525	292.7	73.3337	321.06	2368	310.93	287.219	292.78	62.838
315.23	2813.63	300.75	2588.24	313.61	300.24	300.28	282.686	301.83	74.2286	318.22	2379.5	311.79	307.248	296.15	61.9366	322.53	2421.75	313.77	305.846	292.71	73.2598	321.07	2369.79	310.93	286.879	292.78	62.8837
315.24	2811.52	300.75	2591.06	313.63	299.974	300.29	282.372	301.84	74.1549	318.23	2375.81	311.79	307.77	296.16	61.9021	322.54	2418.01	313.79	305.387	292.72	73.1965	321.08	2364.74	310.95	286.602	292.8	62.7514
315.24	2809.58	300.76	2586.57	313.65	299.763	300.29	282.243	301.86	74.1071	318.24	2372.08	311.81	307.065	296.17	61.8614	322.54	2420.1	313.79	305.332	292.73	73.1203	321.08	2366.25	310.96	286.289	292.8	62.797
315.26	2807.12	300.77	2584.62	313.66	299.377	300.32	281.902	301.87	74.0344	318.24	2374.15	311.82	306.57	296.18	61.8306	322.56	2414.79	313.81	304.837	292.75	73.0602	321.09	2360.97	310.98	285.994	292.82	62.6625
315.26	2805.07	300.78	2582.88	313.67	299.212	300.32	281.727	301.88	73.983	318.25	2368.33	311.82	306.744	296.19	61.7856	322.56	2417.02	313.82	304.599	292.76	72.9977	321.1	2362.69	310.99	285.801	292.83	62.7082
315.27	2802.37	300.79	2580.18	313.69	298.789	300.35	281.524	301.89	73.9229	318.25	2370.31	311.84	306.304	296.2	61.7474	322.57	2413.09	313.82	305.094	292.77	72.9426	321.11	2357.56	311	285.608	292.85	62.5827
315.28	2800.62	300.8	2576.03	313.69	298.982	300.35	281.284	301.9	73.8739	318.26	2367.49	311.85	305.818	296.21	61.7057	322.58	2409.61	313.83	304.296	292.79	72.8745	321.11	2359.18	311.03	285.386	292.85	62.624
315.29	2798.74	300.8	2578.31	313.72	298.56	300.37	281.035	301.91	73.8135	318.27	2365.66	311.86	305.745	296.22	61.6795	322.58	2411.03	313.84	304.076	292.8	72.8177	321.12	2354.2	311.04	285.248	292.87	62.495
315.29	2796.77	300.81	2574.12	313.72	298.661	300.37	280.952	301.92	73.7631	318.28	2363.89	311.88	305.525	296.23	61.6349	322.59	2407.88	313.85	303.846	292.81	72.7518	321.12	2355.73	311.06	285.165	292.87	62.5446
315.3	2795.2	300.82	2569.84	313.73	298.422	300.39	280.85	301.93	73.7067	318.29	2361.76	311.9	305.268	296.24	61.5989	322.6	2404.65	313.86	303.626	292.82	72.6933	321.14	2351	311.07	284.99	292.89	62.4006
315.31	2793.75	300.82	2571.62	313.74	298.229	300.38	280.666	301.94	73.655	318.3	2358.22	311.91	305.002	296.25	61.5572	322.6	2406.47	313.89	303.076	292.84	72.6239	321.14	2352.37	311.07	284.76	292.89	62.454
315.32	2791.6	300.83	2567.71	313.76	297.724	300.41	280.5	301.95	73.5977	318.3	2360.14	311.93	304.718	296.26	61.5237	322.61	2403.14	313.9	302.957	292.85	72.5647	321.15	2347.31	311.07	284.594	292.9	62.3128
315.33	2790.25	300.84	2565.6	313.76	298.018	300.4	280.278	301.96	73.5498	318.32	2354.33	311.94	304.589	296.27	61.4813	322.62	2401.44	313.91	302.535	292.86	72.4986	321.15	2348.9	311.08	284.271	292.91	62.3575
315.33	2787.65	300.85	2561.64	313.77	296.888	300.42	280.048	301.98	73.4872	318.32	2356.6	311.96	304.296	296.28	61.4497	322.63	2399.99	313.92	302.296	292.87	72.4321	321.17	2343.4	311.08	284.041	292.93	62.2352
315.34	2785.84	300.85	2563.32	313.77	297.173	300.42	279.992	301.99	73.4347	318.33	2352.57	311.96	304.424	296.29	61.4075	322.64	2396.63	313.94	301.975	292.89	72.3127	321.17	2345.15	311.08	283.764	292.93	62.2762
315.35	2783.29	300.86	2557.5	313.77	297.402	300.44	279.928	302	73.3804	318.34	2351.52	311.97	303.856	296.29	61.3781	322.64	2398.12	313.95	301.718	292.89	72.3713	321.18	2340.91	311.08	283.543	292.95	62.1539
315.36	2781.19	300.86	2559.45	313.78	296.539	300.43	279.854	302.01	73.3339	318.35	2348.01	311.98	303.443	296.3	61.3349	322.65	2395.04	313.97	301.222	292.91	72.245	321.19	2339	311.09	283.303	292.95	62.1989
315.36	2778.55	300.88	2553.2	313.79	296.171	300.44	279.577	302.02	73.2854	318.35	2349.95	311.98	303.599	296.31	61.3033	322.66	2391.97	313.97	301.424	292.92	72.1882	321.2	2335.26	311.09	283.128	292.97	62.061
315.37	2776.58	300.88	2554.93	313.8	295.693	300.45	279.485	302.03	73.239	318.36	2345.61	311.98	304.076	296.32	61.2684	322.66	2393.7	313.98	300.736	292.94	72.1237	321.2	2336.97	311.11	282.852	292.97	62.1111
315.38	2773.86	300.89	2550.08	313.81	295.997	300.46	279.374	302.05	73.1831	318.37	2342.4	312	303.03	296.33	61.2368	322.68	2388.92	313.99	300.304	292.95	72.0675	321.21	2332.13	311.11	282.584	292.99	61.9764
315.39	2772.05	300.89	2551.61	313.82	295.537	300.47	279.263	302.06	73.136	318.37	2343.88	312	303.259	296.34	61.1921	322.68	2390.54	313.99	300.965	292.96	72.0048	321.21	2333.54	311.13	282.381	292.99	62.0222
315.4	2770.14	300.9	2548.19	313.84	295.234	300.47	279.033	302.07	73.0785	318.38	2340.3	312.01	302.782	296.35	61.154	322.69	2387.59	314.01	299.799	292.97	71.9496	321.23	2328.92	311.13	282.178	293.01	61.9383
315.4	2768.33	300.91	2546.61	313.85	295.013	300.47	278.987	302.08	73.0278	318.39	2338.63	312.02	302.856	296.36	61.1074	322.7	2385.8	314.01	300.47	292.98	71.8858	321.23	2330.49	311.16	282.059	293.02	61.8908
315.41	2765.71	300.92	2543.38	313.86	294.599	300.48	278.876	302.1	72.9669	318.4	2334.57	312.02	302.562	296.37	61.0758	322.71	2382.13	314.02	299.542	293	71.8331	321.24	2325.54	311.16	281.92	293.03	61.8461
315.42	2763.58	300.92	2544.83	313.88	294.011	300.5	278.59	302.1	72.9184	318.4	2336.09	312.03	302.727	296.38	61.0289	322.71	2384.16	314.02	299.68	293.01	71.7819	321.24	2327.11	311.18	281.653	293.04	61.7979
315.43	2760.41	300.93	2540.47	313.89	293.854	300.51	278.414	302.11	72.8595	318.41	2332.5	312.04	302.516	296.39	60.9973	322.73	2378.33	314.02	300.066	293.03	71.6632	321.25	2325.04	311.18	281.533	293.05	61.7583
315.44	2758.2	300.93	2541.5	313.9	293.744	300.51	278.156	302.12	72.8169	318.42	2330.86	312.05	302.03	296.4	60.9406	322.73	2380.51	314.03	299.359	293.03	71.7245	321.26	2323.8	311.2	281.395	293.06	61.7136
315.45	2755.46	300.94	2538.51	313.91	293.799	300.54	277.888	302.14	72.7599	318.43	2328.94	312.06	302.287	296.41	60.9083	322.74	2376.62	314.04	299.184	293.05	71.6091	321.27	2319.96	311.21	281.349	293.08	61.6283
315.45	2753.27	300.95	2536.84	313.92	293.726	300.54	277.713	302.14	72.7098	318.44	2325.19	312.07	301.846	296.42	60.8669	322.75	2374.39	314.05	299.102	293.06	71.5435	321.27	2321.46	311.22	281.275	293.08	61.6733
315.47	2750.64	300.96	2535	313.93	293.671	300.56	277.491	302.16	72.6558	318.44	2327.17	312.08	301.516	296.43	60.8382	322.76	2370.46	314.06	298.909	293.07	71.4865	321.28	2318.82	311.24	281.183	293.09	61.5876
315.47	2748.74	300.97	2533.2	313.94	293.625	300.56	277.15	302.17	72.6075	318.45	2323.53	312.09	301.314	296.44	60.7985	322.76	2372.6	314.08	298.615	293.08	71.4216	321.29	2317.36	311.24	280.915	293.1	61.5335
315.48	2745.78	300.98	2531.12	313.96	294.011	300.58	276.79	302.18	72.5494	318.46	2319.98	312.11	300.616	296.45	60.7676	322.78	2367.15	314.08	298.734	293.1	71.3638	321.3	2314	311.26	280.684	293.12	61.4395
315.48	2743.58	300.99	2527.35	313.96	293.671	300.57	276.577	302.19	72.4995	318.46	2321.57	312.12	300.433	296.46	60.7215	322.78	2369.03	314.09	298.321	293.11	71.3003	321.3	2315.57	311.27	280.463	293.12	61.4892
315.5	2741.02	300.99	2529.39	313.98	293.928	300.58	276.282	302.2	72.4487	318.47	2318.09	312.13	300.084	296.47	60.6877	322.79	2365.23	314.1	298.376	293.12	71.2455	321.31	2312	311.28	280.251	293.14	61.3519
315.5	2739.01	301	2525.28	313.99	293.68	300.59	276.134	302.21	72.405	318.48	2316.73	312.13	300.231	296.48	60.6448	322.8	2363.28	314.11	297.751	293.14	71.1637	321.32	2308.47	311.3	280.029	293.14	61.3977
315.51	2736.16	301.01	2521.84	314.01	293.395	300.6	275.912	302.23	72.3513	318.49	2313.11	312.15	299.753	296.49	60.6138	322.81	2359.35	314.12	298	293.15	71.1088	321.32	2310.37	311.3	279.789	293.16	61.3145
315.52	2734.26	301.01	2523.4	314.02	293.303	300.6	275.718	302.24	72.3087	318.49	2314.49	312.15	299.955	296.5	60.5695	322.81	2361.38	314.14	297.255	293.16	71.0464	321.33	2306.72	311.31	279.485	293.17	61.2662
315.53	2731.84	301.02	2519.96	314.03	293.055	300.62	275.497	302.25	72.2567	318.5	2311.26	312.16	299.607	296.51	60.5386	322.82	2357.61	314.14	297.421	293.17	70.994	321.34	2304.9	311.31	279.328	293.18	61.1816
315.53	2730.42	301.03	2516.29	314.04	292.705	300.63	275.469	302.26	72.2113	318.51	2309.61	312.17	299.405	296.52	60.4895	322.83	2355.62	314.15	296.98	293.19	70.9312	321.35	2303.43	311.32	279.144	293.18	61.2259
315.55	2728.02	301.03	2518.18	314.05	292.374	300.64	275.192	302.27	72.1547	318.52	2306.03	312.18	298.881	296.53	60.4542	322.84	2352.44	314.16	296.777	293.2	70.8749	321.36	2300.23	311.32	279.005	293.2	61.147
315.55	2726.14	301.04	2512.65	314.05	292.539	300.66	275.072	302.28	72.1081	318.52	2307.69	312.18	299.147	296.54	60.4059	322.84	2354.14	314.17	296.438	293.21	70.811	321.36	2301.76	311.32	278.784	293.21	61.1038
315.57	2724.27	301.04	2514.65	314.05	292.917	300.67	275.035	302.29	72.0647	318.53	2304.18	312.19	298.725	296.55	60.3713	322.85	2351.1	314.18	296.079	293.23	70.7593	321.37	2298.16	311.32	278.599	293.22	61.0671
315.57	2722.7	301.05	2510.86	314.06	291.813	300.69	274.878	302.3	72.0196	318.54	2300.63	312.21	298.523	296.56	60.3338	322.86	2349.64	314.19	295.895	293.24	70.6983	321.38	2296.42	311.33	278.433	293.23	61.026
315.58	2720.54	301.06	2507.15	314.06	292.061	300.69	274.619	302.31	71.9694	318.54	2302.54	312.22	298.174	296.57	60.2986	322.87	2346.52	314.21	295.555	293.25	70.6433	321.39	2294.55	311.34	278.294	293.24	60.9908
315.59	2718.93	301.06	2508.79	314.06	292.3	300.72	274.37	302.33	71.925	318.55	2299.16	312.23	298.018	296.58	60.2622	322.87	2347.72	314.21	295.721	293.26	70.578	321.4	2290.95	311.36	278.082	293.25	60.9501
315.6	2716.77	301.07	2505.31	314.07	291.426	300.7	274.092	302.34	71.8748	318.56	2297.44	312.24	297.715	296.59	60.2273	322.88	2345.24	314.22	295.096	293.27	70.5199	321.4	2292.98	311.37	277.851	293.26	60.9134
315.6	2715.31	301.08	2501.95	314.07	291.61	300.73	273.76	302.35	71.8315	318.57	2293.59	312.24	297.825	296.6	60.1855	322.89	2343.58	314.23	295.27	293.28	70.4779	321.41	2289.27	311.39	277.621	293.27	60.8756
315.62	2713.09	301.08	2503.77	314.08	291.058	300.72	274.092	302.36	71.7823	318.57	2295.11	312.26	297.448	296.61	60.1462	322.9	2340.28	314.24	294.82	293.3	70.4229	321.42	2287.45	311.4	277.417	293.28	60.8378
315.62	2711.3	301.09	2498.23	314.09	290.985	300.74	273.982	302.38	71.739	318.58	2292	312.27	297.2	296.62	60.105	322.9	2341.92	314.24	294.93	293.31	70.3619	321.43	2284.01	311.42	277.224	293.29	60.7927
315.64	2709.11	301.09	2500.33	314.1	290.699	300.73	273.649	302.38	71.6845	318.59	2290.76	312.27	297.366	296.63	60.0756	322.91	2338.84	314.26	294.71	293.33	70.3073	321.43	2285.99	311.43	277.03	293.3	60.7553
315.64	2707.46	301.1	2496.67	314.11	290.515	300.75	273.436	302.4	71.6418	318.6	2287.21	312.28	296.98	296.64	60.045	322.92	2337.14	314.26	294.967	293.34	70.248	321.44	2282.5	311.43	276.771	293.31	60.7135
315.65	2705.54	301.11	2495.03	314.14	289.899	300.75	273.196	302.4	71.5909	318.6	2289.21	312.28	297.053	296.65	60.0119	322.93	2334.33	314.28	294.829	293.35	70.1974	321.45	2279.02	311.43	276.577	293.32	60.6786
315.65	2703.56	301.12	2492.62	314.14	290.129	300.77	273.131	302.42	71.5461	318.61	2285.61	312.29	296.704	296.66	59.9697	322.93	2336.2	314.28	294.526	293.36	70.1374	321.45	2280.72	311.44	276.393	293.33	60.636
315.67	2701.79	301.12	2494.31	314.16	289.429	300.78	273.094	302.43	71.4912	318.62	2282.43	312.29	296.824	296.67	59.9362	322.94	2331.25	314.3	294.36	293.38	70.0182	321.46	2275.79	311.44	276.226	293.34	60.5975
315.67	2700.16	301.13	2491.13	314.16	289.613	300.79	272.891	302.44	71.45	318.62	2283.83	312.32	296.502	296.67	59.8948	322.94	2332.8	314.3	294.599	293.38	70.0857	321.46	2277.21	311.44	275.931	293.35	60.5542
315.68	2698.49	301.14	2489.57	314.18	289.254	300.8	272.022	302.45	71.4041	318.63	2279.74	312.32	296.493	296.69	59.8616	322.96	2327.68	314.31	293.9	293.4	69.9657	321.47	2273.97	311.44	275.765	293.36	60.5157
315.68	2697.14	301.15	2486.42	314.19	288.895	300.82	271.837	302.46	71.3596	318.64	2278.16	312.34	296.144	296.69	59.8209	322.96	2329.81	314.31	294.139	293.41	69.9136	321.48	2272.47	311.45	275.478	293.37	60.4739
315.7	2695.36	301.15	2488.22	314.21	288.417	300.83	271.717	302.47	71.2987	318.65	2276.23	312.34	296.3	296.71	59.7856	322.97	2323.77	314.34	293.174	293.42	69.8612	321.49	2270.48	311.46	275.321	293.39	60.4372
315.7	2693.68	301.16	2482.57	314.21	288.463	300.85	271.615	302.48	71.2553	318.66	2272.9	312.36	295.647	296.72	59.7412	322.97	2325.86	314.34	293.367	293.44	69.8044	321.5	2268.72	311.47	275.275	293.4	60.3942
315.71	2691.72	301.16	2484.82	314.22	288.638	300.86	271.495	302.49	71.205	318.66	2274.66	312.36	295.96	296.73	59.7106	322.98	2322.09	314.36	292.107	293.45	69.7534	321.51	2265	311.48	275.072	293.41	60.3579
315.72	2689.87	301.17	2480.86	314.22	288.766	300.87	271.283	302.5	71.1613	318.67	2269.57	312.38	295.087	296.73	59.6716	322.99	2320.11	314.37	292.024	293.46	69.6984	321.51	2266.7	311.5	274.721	293.42	60.3175
315.73	2687.31	301.18	2477.18	314.23	288.251	300.88	270.95	302.51	71.1146	318.67	2271.28	312.38	295.371	296.75	59.6429	323	2316.43	314.37	292.953	293.47	69.6488	321.52	2263.1	311.51	274.564	293.43	60.2797
315.74	2685.87	301.18	2478.86	314.24	288.462	300.89	270.709	302.53	71.0727	318.68	2268.13	312.39	294.903	296.75	59.6098	323	2318.52	314.38	291.831	293.49	69.5866	321.53	2261.65	311.53	274.471	293.44	60.2302
315.75	2684.18	301.19	2475.42	314.26	287.726	300.9	270.506	302.53	71.0253	318.69	2265.04	312.4	294.535	296.77	59.5748	323.01	2314.79	314.4	291.675	293.5	69.5327	321.54	2258.18	311.54	274.582	293.45	60.148
315.75	2682.75	301.2	2471.99	314.26	287.864	300.91	270.321	302.55	70.9841	318.69	2266.78	312.41	294.333	296.77	59.538	323.02	2313.52	314.41	291.509	293.51	69.4633	321.54	2259.78	311.56	274.425	293.45	60.1905
315.76	2681.01	301.2	2473.89	314.28	286.63	300.91	270.136	302.56	70.9367	318.7	2263.17	312.42	293.882	296.79	59.5031	323.03	2310.47	314.42	291.408	293.52	69.4144	321.55	2253.18	311.56	274.286	293.47	60.113
315.77	2679.31	301.21	2469.78	314.28	287.302	300.92	270.071	302.57	70.8919	318.71	2259.88	312.42	294.057	296.79	59.4601	323.03	2311.96	314.43	291.067	293.54	69.354	321.55	2254.81	311.57	273.963	293.48	60.0719
315.78	2677.35	301.22	2467.82	314.28	287.652	300.93	269.738	302.58	70.8416	318.71	2261.64	312.44	293.763	296.81	59.4266	323.04	2309.08	314.43	291.242	293.55	69.299	321.56	2251.24	311.57	273.871	293.49	60.0355
315.78	2675.89	301.23	2464.45	314.3	286.096	300.94	269.609	302.6	70.8007	318.72	2258.62	312.45	293.634	296.82	59.3796	323.05	2307.68	314.44	290.966	293.56	69.2375	321.57	2249.78	311.58	273.677	293.5	59.9893
315.79	2674.07	301.23	2466.27	314.3	286.427	300.95	269.516	302.61	70.7569	318.73	2257.03	312.47	293.422	296.83	59.3454	323.06	2304.7	314.45	290.764	293.57	69.1854	321.58	2245.95	311.58	273.483	293.51	59.9558
315.8	2672.59	301.24	2461.43	314.33	285.81	300.96	269.72	302.62	70.7189	318.74	2253.94	312.48	293.211	296.83	59.3083	323.06	2306.36	314.46	290.534	293.59	69.1246	321.58	2247.39	311.59	273.178	293.52	59.9165
315.81	2670.96	301.24	2462.99	314.33	285.93	300.97	269.618	302.63	70.6765	318.74	2255.61	312.49	293.055	296.84	59.2737	323.07	2301.39	314.46	290.635	293.6	69.0738	321.59	2242.99	311.59	272.771	293.53	59.8816
315.82	2669.55	301.25	2459.95	314.34	285.405	300.97	269.442	302.64	70.6367	318.75	2252.48	312.51	292.907	296.85	59.2369	323.07	2303.04	314.48	290.129	293.61	69.0113	321.59	2244.39	311.6	272.605	293.54	59.8416
315.82	2667.63	301.26	2458.22	314.34	285.7	300.99	269.211	302.65	70.5878	318.76	2250.83	312.52	292.659	296.86	59.2067	323.08	2300.01	314.48	290.295	293.62	68.9591	321.6	2241.41	311.61	271.884	293.55	59.8063
315.83	2666.31	301.27	2455.32	314.36	285.257	300.99	268.915	302.66	70.5455	318.77	2247.2	312.54	292.429	296.87	59.1655	323.09	2298.12	314.5	289.89	293.63	68.9004	321.61	2240.06	311.61	271.652	293.56	59.7706
315.84	2664.71	301.27	2457.14	314.37	285.009	301	268.897	302.67	70.4999	318.77	2249.04	312.55	292.024	296.88	59.1327	323.1	2295.27	314.51	289.742	293.64	68.8508	321.62	2236.88	311.63	271.579	293.57	59.7338
315.85	2663.52	301.28	2453.64	314.38	284.76	301	268.73	302.68	70.4579	318.78	2243.78	312.55	292.199	296.89	59.0948	323.1	2296.88	314.53	289.512	293.66	68.7947	321.62	2238.32	311.64	271.532	293.58	59.6789
315.86	2661.65	301.29	2451.52	314.38	284.87	301.01	268.462	302.69	70.4083	318.78	2245.61	312.55	292.319	296.9	59.0624	323.11	2293.81	314.54	289.356	293.67	68.7454	321.63	2234.93	311.64	271.671	293.59	59.5959
315.86	2660.02	301.3	2447.64	314.39	284.437	301.01	267.962	302.7	70.3663	318.8	2240.97	312.55	292.171	296.91	59.0271	323.12	2291.87	314.56	289.144	293.68	68.6849	321.64	2233.4	311.67	271.532	293.59	59.6396
315.87	2658.3	301.3	2449.88	314.39	284.585	301.02	267.749	302.71	70.3178	318.8	2242.69	312.56	291.316	296.92	58.9921	323.13	2288.51	314.57	288.923	293.69	68.6352	321.65	2231.27	311.67	271.44	293.6	59.5591
315.87	2656.87	301.31	2445.96	314.4	284.207	301.02	267.647	302.72	70.2823	318.81	2238.56	312.56	291.61	296.93	58.9524	323.13	2290.39	314.58	288.214	293.7	68.5805	321.66	2229.55	311.7	271.301	293.61	59.5198
315.88	2654.69	301.32	2443.95	314.41	283.986	301.03	267.49	302.73	70.2273	318.81	2240.32	312.57	291.012	296.94	58.9145	323.14	2286.99	314.58	288.389	293.71	68.5294	321.67	2226.23	311.7	271.745	293.62	59.4834
315.89	2652.99	301.33	2440.18	314.43	283.764	301.04	267.351	302.74	70.1846	318.83	2235.64	312.58	290.699	296.94	58.8697	323.15	2285.01	314.58	288.638	293.73	68.4718	321.67	2227.68	311.72	271.56	293.64	59.3989
315.9	2651.16	301.33	2442.2	314.44	283.46	301.05	267.018	302.76	70.1343	318.83	2237.25	312.58	290.846	296.96	58.8372	323.16	2281.76	314.59	288.03	293.74	68.42	321.68	2224.53	311.71	271.329	293.64	59.436
315.9	2649.54	301.34	2438.5	314.46	283.248	301.06	266.851	302.77	70.0908	318.84	2233.34	312.59	290.221	296.97	58.8034	323.16	2283.44	314.6	287.321	293.76	68.3127	321.69	2223.31	311.72	271.051	293.65	59.3559
315.91	2648.11	301.35	2436.62	314.47	282.962	301.07	266.685	302.78	70.0416	318.84	2234.93	312.6	289.871	296.98	58.772	323.17	2280.41	314.6	287.523	293.76	68.3595	321.7	2220.44	311.73	270.682	293.66	59.3181
315.92	2647.01	301.36	2434.95	314.49	282.796	301.08	266.629	302.79	70.0007	318.86	2229.73	312.63	289.834	296.99	58.733	323.18	2277.58	314.6	287.735	293.78	68.2331	321.7	2221.81	311.73	270.497	293.67	59.2653
315.93	2644.67	301.37	2431.65	314.5	282.501	301.09	266.518	302.8	69.9583	318.86	2231.94	312.63	289.696	297	58.7013	323.18	2278.86	314.61	286.952	293.79	68.1853	321.71	2217.12	311.75	270.192	293.68	59.23
315.93	2642.91	301.37	2433.14	314.51	282.169	301.1	266.25	302.81	69.9169	318.87	2225.99	312.65	289.752	297.01	58.6609	323.19	2275.75	314.61	287.164	293.8	68.1269	321.71	2218.6	311.75	269.748	293.7	59.1568
315.94	2641.06	301.38	2428.35	314.52	281.736	301.11	265.963	302.82	69.8677	318.87	2228.34	312.66	289.65	297.02	58.6262	323.2	2274.25	314.63	286.75	293.81	68.0758	321.72	2215.57	311.75	269.59	293.7	59.1913
315.95	2639.54	301.38	2430.06	314.52	282.317	301.13	265.778	302.83	69.8235	318.88	2222.92	312.67	289.07	297.03	58.5818	323.21	2270.37	314.64	286.473	293.83	68.0156	321.73	2214.18	311.78	269.442	293.72	59.0835
315.96	2637.43	301.39	2426.18	314.53	281.994	301.14	265.713	302.84	69.7743	318.89	2224.59	312.67	289.429	297.04	58.5519	323.21	2272.39	314.66	286.298	293.84	67.9623	321.74	2211.6	311.77	269.276	293.72	59.1214
315.96	2635.7	301.4	2422.12	314.54	281.524	301.16	265.518	302.85	69.7344	318.9	2219.86	312.69	288.343	297.05	58.5114	323.22	2268.61	314.67	286.612	293.85	67.9054	321.74	2212.77	311.79	269.082	293.74	59.0027
315.98	2633.91	301.4	2423.89	314.55	281.256	301.17	265.222	302.86	69.6909	318.9	2221.53	312.69	288.573	297.06	58.4779	323.23	2267.19	314.68	286.483	293.86	67.8517	321.75	2210.1	311.79	268.961	293.74	59.0384
315.98	2632.81	301.41	2420.63	314.56	281.182	301.18	265.065	302.88	69.6489	318.91	2216.79	312.69	288.812	297.07	58.44	323.24	2263.75	314.69	286.262	293.88	67.7952	321.76	2207.23	311.8	268.813	293.76	58.9211
315.99	2631.2	301.42	2418.84	314.57	281.026	301.18	264.954	302.88	69.5971	318.92	2218.47	312.71	287.91	297.08	58.4072	323.24	2265.36	314.7	285.764	293.89	67.7451	321.76	2208.66	311.8	268.823	293.76	58.9582
316	2629.62	301.43	2415.56	314.58	280.85	301.2	264.833	302.9	69.5576	318.93	2213.68	312.71	287.846	297.09	58.3805	323.26	2261.03	314.7	285.902	293.9	67.6792	321.77	2206.23	311.81	268.878	293.77	58.8802
316.01	2627.97	301.43	2417.28	314.59	280.574	301.2	265.028	302.91	69.5112	318.93	2215.34	312.72	288.251	297.1	58.3536	323.26	2262.18	314.7	286.096	293.91	67.6276	321.78	2203.82	311.82	268.693	293.78	58.8445
316.01	2626.59	301.44	2413.98	314.6	280.463	301.21	264.805	302.92	69.4709	318.94	2210.2	312.73	288.094	297.1	58.3113	323.27	2259.33	314.72	285.451	293.92	67.5685	321.78	2204.95	311.81	268.462	293.79	58.8012
316.02	2624.61	301.45	2412.24	314.61	280.38	301.2	264.481	302.93	69.4256	318.95	2212.16	312.75	287.882	297.11	58.2759	323.28	2257.86	314.72	285.589	293.93	67.5188	321.79	2201.58	311.83	268.36	293.8	58.772
316.03	2622.95	301.46	2408.94	314.61	280.297	301.21	264.416	302.94	69.3861	318.96	2207.45	312.76	287.671	297.12	58.2394	323.29	2254.92	314.73	284.741	293.95	67.4565	321.79	2203.03	311.82	268.221	293.81	58.733
316.04	2621.19	301.46	2410.66	314.62	280.398	301.21	264.416	302.95	69.3339	318.96	2208.81	312.77	287.486	297.13	58.2044	323.29	2256.12	314.74	284.538	293.96	67.4078	321.8	2199.77	311.84	268.018	293.82	58.6995
316.04	2619.52	301.47	2407.43	314.63	280.223	301.23	264.203	302.96	69.2937	318.97	2204.23	312.78	287.321	297.14	58.1676	323.3	2252.5	314.75	284.253	293.97	67.3523	321.81	2198.23	311.86	267.768	293.83	58.6773
316.06	2617.46	301.48	2403.76	314.64	280.002	301.25	263.861	302.97	69.2444	318.98	2206.19	312.79	286.685	297.15	58.1348	323.3	2253.66	314.76	284.068	293.98	67.2986	321.82	2195.45	311.88	267.749	293.84	58.6452
316.06	2615.72	301.48	2405.37	314.64	280.122	301.26	263.768	302.99	69.2038	318.99	2201.55	312.79	287.127	297.16	58.0972	323.32	2249.04	314.78	283.856	293.99	67.2366	321.82	2196.71	311.89	267.536	293.85	58.5687
316.07	2613.81	301.49	2400.67	314.66	279.642	301.26	263.231	302.99	69.1563	318.99	2203.01	312.8	285.902	297.17	58.0669	323.32	2250.35	314.79	283.672	294	67.1854	321.83	2194.19	311.9	267.388	293.85	58.6048
316.07	2612.42	301.49	2402.07	314.66	279.854	301.27	263.101	303.01	69.1157	319.01	2198.76	312.81	285.524	297.17	58.0305	323.33	2245.67	314.8	283.571	294.01	67.1302	321.84	2193.28	311.91	267.24	293.87	58.5267
316.09	2610.77	301.5	2399.12	314.68	279.06	301.28	262.916	303.01	69.0689	319.01	2200.32	312.81	285.672	297.18	57.9984	323.33	2247.08	314.81	283.405	294.02	67.0837	321.85	2191.28	311.91	267.064	293.88	58.4917
316.08	2609.12	301.51	2397.72	314.68	279.43	301.3	262.721	303.03	69.029	319.02	2195.47	312.81	285.801	297.19	57.9611	323.35	2242.26	314.83	282.953	294.04	67.0278	321.85	2191.82	311.92	266.824	293.89	58.4538
316.1	2606.95	301.52	2394.53	314.69	278.756	301.3	262.48	303.03	68.9764	319.02	2197.23	312.83	285.23	297.2	57.9287	323.35	2243.78	314.83	283.174	294.05	66.9831	321.86	2189.65	311.92	266.629	293.9	58.4188
316.1	2605.36	301.52	2395.93	314.7	278.507	301.31	262.378	303.05	68.9344	319.03	2194.11	312.84	284.833	297.21	57.8845	323.36	2239.71	314.85	282.584	294.06	66.929	321.87	2188.32	311.93	266.546	293.91	58.3525
316.12	2603.93	301.53	2391.19	314.71	278.193	301.31	262.193	303.05	68.8869	319.04	2192.58	312.84	285.045	297.22	57.8495	323.36	2241.27	314.85	282.741	294.07	66.8799	321.88	2186.24	311.93	266.13	293.91	58.3802
316.12	2602.53	301.53	2392.7	314.72	277.833	301.33	262.045	303.07	68.8495	319.05	2189.24	312.86	284.603	297.22	57.8072	323.37	2236.21	314.86	282.206	294.08	66.8265	321.89	2182.79	311.94	265.88	293.93	58.3087
316.14	2600.64	301.54	2387.61	314.72	277.999	301.35	261.85	303.08	68.8157	319.05	2191.07	312.87	284.041	297.24	57.7711	323.38	2237.73	314.87	282.381	294.1	66.78	321.89	2184.68	311.95	265.722	293.94	58.2726
316.13	2598.9	301.54	2389.49	314.73	277.685	301.36	261.693	303.09	68.7764	319.06	2186.28	312.87	284.262	297.24	57.7331	323.39	2233.36	314.88	281.745	294.11	66.7273	321.9	2179.49	311.96	265.417	293.95	58.2289
316.15	2596.61	301.55	2384.22	314.73	277.713	301.38	261.535	303.1	68.7264	319.06	2187.87	312.88	283.792	297.25	57.7112	323.39	2234.62	314.88	281.92	294.12	66.6772	321.9	2181.18	311.97	265.278	293.96	58.1931
316.15	2594.82	301.55	2385.73	314.75	277.621	301.39	261.378	303.11	68.6865	319.08	2183.42	312.9	283.654	297.26	57.6762	323.4	2230.12	314.9	281.607	294.13	66.6202	321.91	2178.2	311.98	265.194	293.97	58.1574
316.16	2592.6	301.57	2381.3	314.76	277.445	301.4	261.174	303.12	68.6429	319.08	2184.96	312.91	283.515	297.27	57.6437	323.4	2231.66	314.91	281.45	294.14	66.5715	321.92	2175.08	311.99	265.102	293.98	58.1267
316.16	2590.53	301.57	2382.5	314.78	277.353	301.41	260.97	303.13	68.6066	319.09	2179.88	312.92	283.451	297.28	57.6043	323.41	2227.31	314.92	281.173	294.16	66.4694	321.92	2176.56	311.99	264.815	293.99	58.0866
316.18	2588.24	301.58	2378.32	314.79	277.15	301.42	260.729	303.14	68.5677	319.09	2181.55	312.92	283.543	297.29	57.5755	323.42	2228.58	314.93	280.933	294.16	66.5181	321.93	2172.87	312.02	264.741	294	58.053
316.18	2586.33	301.58	2379.72	314.81	276.965	301.42	260.525	303.15	68.5252	319.1	2176.17	312.93	283.276	297.3	57.5408	323.43	2224.12	314.94	280.749	294.18	66.4308	321.93	2173.8	312.02	264.574	294.01	58.0115
316.2	2584.18	301.59	2375.38	314.83	276.66	301.43	260.339	303.16	68.4907	319.1	2177.75	312.94	283.036	297.31	57.513	323.43	2225.68	314.95	280.315	294.19	66.3817	321.94	2170.2	312.03	264.426	294.02	57.9753
316.2	2582.58	301.6	2372.25	314.85	276.365	301.44	260.173	303.17	68.4526	319.12	2173.23	312.95	282.879	297.32	57.478	323.44	2220.95	314.95	280.426	294.2	66.3272	321.94	2171.47	312.04	264.379	294.03	57.9348
316.21	2580.23	301.6	2376.69	314.87	275.94	301.44	259.959	303.18	68.4083	319.12	2174.84	312.96	282.686	297.33	57.4437	323.44	2222.51	314.95	280.629	294.21	66.2831	321.95	2168.66	312.05	264.166	294.04	57.8995
316.21	2578.67	301.61	2369.35	314.88	275.654	301.45	259.802	303.19	68.3697	319.13	2169.54	312.97	282.529	297.34	57.3988	323.45	2218.97	314.96	280.159	294.22	66.2318	321.96	2167.26	312.06	263.953	294.05	57.8615
316.22	2576.53	301.61	2373.82	314.89	275.275	301.46	259.589	303.2	68.324	319.13	2171.24	312.98	282.031	297.34	57.3645	323.46	2217.47	314.96	280.223	294.23	66.182	321.97	2164.62	312.08	263.796	294.06	57.8283
316.23	2574.34	301.62	2370.77	314.9	275.026	301.46	259.486	303.21	68.2837	319.14	2168.15	312.98	282.344	297.36	57.3291	323.47	2213.83	314.97	280.029	294.25	66.1499	321.97	2165.7	312.09	263.722	294.07	57.7885
316.24	2572.63	301.63	2366.32	314.92	274.869	301.47	259.32	303.22	68.2293	319.15	2165.31	313	281.764	297.36	57.2984	323.47	2215.49	314.97	280.159	294.26	66.1034	321.98	2163.14	312.1	263.675	294.08	57.752
316.24	2571.37	301.63	2367.71	314.92	274.748	301.46	259.116	303.23	68.1883	319.15	2166.63	313.02	281.644	297.38	57.2641	323.48	2211.92	314.99	279.882	294.27	66.0495	321.99	2161.73	312.11	263.574	294.09	57.7079
316.25	2569.03	301.64	2363.13	314.93	274.638	301.48	258.893	303.25	68.1425	319.16	2163.73	313.04	281.542	297.38	57.2341	323.49	2210.32	315	279.688	294.28	66.0066	322	2158.54	312.12	263.537	294.1	57.6721
316.26	2567.38	301.64	2364.52	314.94	274.573	301.46	258.717	303.26	68.1069	319.17	2160.97	313.05	281.404	297.39	57.1991	323.5	2207.1	315.02	279.476	294.29	65.952	322	2159.95	312.13	263.351	294.11	57.6309
316.26	2565.2	301.66	2359.88	314.95	274.259	301.49	258.476	303.27	68.0669	319.17	2162.36	313.06	281.182	297.4	57.1684	323.5	2208.62	315.03	278.987	294.3	65.9083	322.01	2157	312.13	263.305	294.12	57.5966
316.27	2563.64	301.66	2361.38	314.95	274.407	301.48	258.355	303.27	68.0266	319.18	2159.65	313.07	281.312	297.41	57.1348	323.51	2203.28	315.03	279.226	294.32	65.8589	322.02	2155.7	312.15	263.11	294.13	57.5568
316.28	2561.23	301.67	2356.64	314.96	273.741	301.51	258.216	303.29	67.983	319.19	2156.57	313.08	281.155	297.42	57.1063	323.51	2205.06	315.04	278.728	294.33	65.8141	322.03	2152.92	312.15	262.971	294.14	57.5247
316.28	2559.01	301.67	2358.06	314.96	273.889	301.5	257.993	303.29	67.948	319.19	2158.02	313.09	280.647	297.43	57.0665	323.53	2200.39	315.05	277.971	294.34	65.761	322.03	2154.11	312.16	262.397	294.15	57.4878
316.29	2556.07	301.68	2353.37	314.96	274.102	301.53	257.919	303.31	67.9062	319.2	2154.92	313.09	281.007	297.44	57.0344	323.53	2201.67	315.05	278.47	294.35	65.7147	322.04	2150.3	312.16	261.748	294.16	57.4557
316.3	2554.09	301.68	2354.84	314.98	273.094	301.54	257.78	303.31	67.8681	319.21	2154.2	313.1	279.55	297.45	56.9866	323.54	2197.99	315.06	277.667	294.36	65.6631	322.04	2151.2	312.17	261.628	294.17	57.4152
316.31	2551.2	301.69	2350.69	314.98	273.261	301.56	257.585	303.33	67.8245	319.22	2152.66	313.1	279.983	297.45	56.9526	323.54	2199.53	315.06	277.824	294.37	65.6165	322.05	2148.47	312.17	261.452	294.18	57.3937
316.31	2549.24	301.7	2347.85	314.99	272.901	301.57	257.465	303.33	67.7866	319.23	2150.21	313.1	280.214	297.46	56.9194	323.55	2195.11	315.06	278.239	294.39	65.5113	322.06	2146.98	312.18	261.248	294.19	57.3605
316.33	2546.9	301.7	2351.69	315	272.789	301.59	257.298	303.35	67.742	319.23	2151.57	313.1	280.795	297.47	56.8956	323.55	2196.38	315.08	277.538	294.39	65.5608	322.07	2142.92	312.19	261.081	294.2	57.3225
316.33	2545.47	301.71	2349.18	315.01	272.595	301.58	257.121	303.36	67.7034	319.24	2148.84	313.11	279.051	297.48	56.8576	323.57	2191.93	315.09	277.233	294.41	65.4553	322.07	2144.42	312.19	260.905	294.21	57.282
316.34	2543.03	301.72	2344.88	315.02	272.383	301.6	257.186	303.37	67.6594	319.25	2145.63	313.11	279.282	297.49	56.8255	323.57	2193.52	315.1	277.094	294.42	65.4062	322.08	2141.07	312.2	260.821	294.23	57.2491
316.35	2541.37	301.72	2346.2	315.03	271.995	301.59	257.075	303.38	67.6216	319.25	2147.02	313.11	280.435	297.5	56.7842	323.58	2188.59	315.12	277.113	294.43	65.3509	322.09	2137.82	312.2	260.998	294.24	57.2002
316.36	2539.3	301.73	2341.94	315.03	272.235	301.61	256.741	303.39	67.5776	319.26	2144.05	313.12	278.839	297.51	56.7517	323.58	2190.07	315.13	277.03	294.44	65.3086	322.09	2139.64	312.21	261.359	294.25	57.1692
316.36	2538.09	301.73	2343.42	315.04	271.736	301.61	256.592	303.4	67.5394	319.27	2141.22	313.13	278.719	297.52	56.7159	323.59	2186.8	315.14	276.78	294.46	65.2594	322.1	2136.46	312.22	261.155	294.26	57.1323
316.37	2536.19	301.74	2339.5	315.04	271.865	301.63	256.351	303.41	67.498	319.27	2142.81	313.14	278.534	297.53	56.694	323.6	2185.33	315.16	276.623	294.47	65.2168	322.11	2132.81	312.23	260.923	294.27	57.0772
316.38	2534.67	301.74	2340.85	315.05	271.542	301.64	256.138	303.42	67.4616	319.28	2138.3	313.15	278.424	297.54	56.6615	323.61	2182.27	315.17	276.42	294.48	65.1665	322.11	2134.63	312.23	260.747	294.27	57.1122
316.39	2532.63	301.75	2336.29	315.06	271.653	301.66	256.008	303.43	67.4183	319.28	2139.88	313.18	278.248	297.55	56.6322	323.61	2183.68	315.19	275.949	294.49	65.1206	322.12	2128.97	312.23	260.618	294.28	57.0446
316.39	2531.47	301.75	2337.81	315.07	271.209	301.67	255.859	303.44	67.383	319.29	2136.97	313.19	278.101	297.56	56.5949	323.62	2180.64	315.19	276.226	294.5	65.0707	322.12	2131.1	312.25	260.441	294.29	57.0074
316.4	2529.78	301.76	2333.06	315.07	271.375	301.67	255.442	303.45	67.3408	319.3	2133.89	313.21	277.971	297.57	56.5672	323.63	2179.34	315.2	275.792	294.52	65.0335	322.13	2127.41	312.25	260.173	294.3	56.9727
316.41	2528.27	301.77	2334.55	315.08	270.904	301.69	255.293	303.46	67.3023	319.3	2135.26	313.22	277.685	297.58	56.5376	323.64	2175.78	315.21	275.34	294.53	64.981	322.14	2124.83	312.27	259.811	294.31	56.9336
316.42	2525.83	301.78	2329.94	315.08	271.098	301.7	255.154	303.47	67.2557	319.31	2131.1	313.22	277.897	297.59	56.5116	323.64	2177.01	315.22	275.146	294.54	64.9359	322.14	2126.18	312.27	259.561	294.32	56.8934
316.42	2524.3	301.78	2331.43	315.09	270.746	301.7	255.024	303.48	67.2154	319.31	2132.31	313.23	277.242	297.6	56.4813	323.65	2175.38	315.22	275.229	294.55	64.8841	322.15	2123.72	312.28	259.32	294.33	56.8558
316.43	2522.39	301.79	2326.52	315.1	270.515	301.71	254.959	303.49	67.1537	319.32	2129.73	313.23	277.325	297.61	56.4531	323.66	2174.14	315.23	274.444	294.56	64.8389	322.16	2121.97	312.28	259.18	294.34	56.8255
316.44	2521.11	301.79	2328.07	315.11	270.025	301.72	254.978	303.5	67.113	319.33	2127.22	313.23	277.51	297.62	56.4192	323.67	2171.34	315.23	274.536	294.57	64.7843	322.16	2123.18	312.3	258.986	294.35	56.7901
316.44	2519.41	301.8	2324.97	315.11	270.293	301.72	254.68	303.51	67.0697	319.33	2128.62	313.24	277.279	297.63	56.3819	323.67	2172.63	315.23	274.712	294.58	64.7416	322.17	2120.41	312.3	258.754	294.36	56.7583
316.45	2518.05	301.81	2323.6	315.12	269.933	301.74	254.532	303.52	67.0336	319.34	2126.02	313.25	276.78	297.64	56.3446	323.68	2168.81	315.23	274.97	294.59	64.691	322.18	2119.11	312.31	258.893	294.37	56.7173
316.46	2516.58	301.82	2320.54	315.13	269.822	301.74	254.291	303.53	66.9886	319.35	2124.49	313.25	276.873	297.64	56.315	323.68	2169.89	315.24	274.305	294.61	64.6476	322.19	2117.68	312.32	258.967	294.38	56.6461
316.47	2515.22	301.82	2322.01	315.15	269.637	301.76	254.124	303.54	66.9507	319.36	2121.84	313.25	277.159	297.66	56.2817	323.69	2167.33	315.25	274.305	294.62	64.6002	322.2	2115.51	312.33	259.069	294.38	56.683
316.47	2513.59	301.83	2318.52	315.17	269.489	301.76	253.929	303.55	66.9049	319.36	2123.34	313.27	276.614	297.67	56.258	323.7	2166.46	315.25	274.527	294.63	64.5542	322.2	2117.12	312.33	259.125	294.39	56.6143
316.48	2512.65	301.83	2319.02	315.18	269.433	301.77	253.817	303.56	66.8663	319.37	2120.63	313.27	276.734	297.68	56.2232	323.71	2163.36	315.27	274.092	294.64	64.483	322.21	2114.16	312.34	258.819	294.4	56.5763
316.49	2511.27	301.84	2316.84	315.2	269.267	301.76	253.678	303.57	66.8118	319.38	2119.15	313.3	276.088	297.68	56.194	323.71	2164.72	315.28	273.935	294.65	64.4396	322.22	2111.37	312.35	258.401	294.41	56.5438
316.5	2510.02	301.85	2315.49	315.21	269.137	301.77	253.52	303.58	66.774	319.39	2117.68	313.3	276.254	297.7	56.1607	323.73	2160.17	315.3	273.88	294.66	64.3918	322.22	2112.61	312.36	258.383	294.42	56.5057
316.5	2508.38	301.86	2312.48	315.23	268.952	301.78	253.548	303.59	66.7307	319.4	2114.62	313.3	276.466	297.7	56.1377	323.73	2161.58	315.31	273.751	294.67	64.3506	322.23	2110.68	312.36	258.392	294.43	56.4721
316.51	2507.17	301.86	2313.81	315.24	268.786	301.77	253.334	303.61	66.6949	319.4	2116.12	313.3	276.836	297.71	56.1048	323.74	2157.02	315.33	273.612	294.68	64.3021	322.24	2109.22	312.38	257.919	294.44	56.4326
316.52	2505.46	301.87	2310.71	315.25	268.434	301.79	253.111	303.62	66.6527	319.41	2113	313.3	277.048	297.72	56.0781	323.74	2158.47	315.34	273.464	294.7	64.2597	322.24	2109.48	312.38	257.687	294.45	56.3997
316.53	2504.15	301.88	2309.53	315.26	268.027	301.79	253.158	303.63	66.6181	319.42	2110.16	313.31	275.875	297.73	56.0408	323.75	2155.41	315.36	272.568	294.71	64.1914	322.25	2107.84	312.39	257.39	294.46	56.3632
316.53	2502.3	301.89	2306.55	315.26	268.591	301.8	253.121	303.64	66.5766	319.42	2111.78	313.32	275.607	297.74	56.0134	323.76	2154.24	315.36	272.771	294.72	64.1461	322.26	2105.09	312.4	257.214	294.47	56.3318
316.54	2500.75	301.89	2307.95	315.27	268.249	301.8	252.963	303.65	66.5391	319.43	2107.53	313.33	274.619	297.75	55.9848	323.77	2152.2	315.38	272.253	294.73	64.0947	322.26	2106.3	312.41	256.861	294.48	56.2945
316.55	2499.04	301.9	2303.91	315.28	267.083	301.83	252.684	303.66	66.4961	319.43	2108.99	313.33	275.404	297.75	55.9567	323.77	2153.07	315.38	272.364	294.74	64.0466	322.27	2102.59	312.43	256.685	294.49	56.2616
316.55	2497.72	301.9	2305	315.28	267.573	301.83	252.498	303.67	66.4575	319.44	2106.23	313.35	274.656	297.77	55.9205	323.79	2149.92	315.39	271.837	294.75	63.9952	322.27	2103.79	312.44	256.36	294.5	56.2177
316.57	2495.99	301.91	2302.69	315.28	267.749	301.85	252.303	303.68	66.4095	319.45	2104.28	313.36	274.85	297.77	55.8894	323.79	2150.99	315.4	271.44	294.76	63.9495	322.28	2099.41	312.46	256.23	294.51	56.1848
316.57	2494.43	301.92	2300.21	315.29	266.824	301.86	252.173	303.7	66.3738	319.46	2101.58	313.38	274.675	297.78	55.8528	323.8	2147.54	315.4	271.985	294.77	63.8941	322.28	2100.8	312.45	256.036	294.52	56.1468
316.58	2492.7	301.92	2301.58	315.29	267.314	301.87	252.015	303.71	66.3312	319.46	2102.96	313.39	274.554	297.79	55.8214	323.8	2148.56	315.41	271.163	294.78	63.8489	322.29	2097.89	312.47	255.924	294.53	56.1139
316.58	2491.28	301.93	2298.95	315.3	266.703	301.87	251.69	303.72	66.2926	319.47	2098.95	313.41	274.397	297.8	55.787	323.81	2145.65	315.41	271.606	294.8	63.7964	322.3	2096.57	312.47	255.757	294.54	56.0762
316.59	2489.9	301.94	2296.46	315.31	266.49	301.89	251.412	303.73	66.2478	319.47	2100.41	313.42	274.139	297.8	55.7559	323.82	2141.66	315.42	270.737	294.81	63.754	322.31	2093.04	312.49	255.534	294.55	56.0433
316.59	2488.98	301.94	2297.66	315.32	266.685	301.89	251.226	303.74	66.2121	319.48	2097.26	313.43	274.037	297.82	55.7226	323.82	2144.14	315.43	270.95	294.82	63.7048	322.31	2095.07	312.49	255.655	294.56	55.9702
316.61	2487.67	301.95	2294.17	315.33	266.379	301.91	251.3	303.75	66.1734	319.49	2095.79	313.44	273.797	297.83	55.697	323.83	2140.18	315.43	271.236	294.83	63.6635	322.32	2091.5	312.51	255.924	294.56	56.0104
316.61	2486.33	301.95	2295.74	315.33	266.509	301.9	251.096	303.76	66.1381	319.5	2092.58	313.45	273.427	297.84	55.6655	323.84	2136.76	315.44	270.303	294.85	63.5718	322.33	2090.18	312.51	255.46	294.57	55.9314
316.62	2484.43	301.96	2291.32	315.34	266.25	301.93	250.826	303.77	66.0936	319.5	2094.34	313.46	272.854	297.84	55.6348	323.84	2138.21	315.45	270.469	294.85	63.6131	322.34	2088.77	312.52	254.838	294.58	55.8963
316.62	2482.83	301.96	2292.61	315.36	266.139	301.93	250.65	303.78	66.0568	319.51	2091.22	313.47	272.734	297.86	55.6	323.85	2136.54	315.47	269.868	294.87	63.4889	322.35	2087.78	312.53	254.653	294.59	55.8575
316.64	2481.14	301.97	2289.58	315.37	266.092	301.95	250.417	303.79	66.0211	319.52	2088.06	313.48	272.438	297.86	55.5803	323.86	2135.28	315.47	270.043	294.87	63.5298	322.36	2085.7	312.53	254.523	294.6	55.8239
316.64	2479.67	301.98	2288.12	315.38	265.944	301.95	250.315	303.8	65.9871	319.52	2089.47	313.48	272.54	297.88	55.5503	323.87	2132.55	315.48	269.701	294.89	63.4414	322.36	2086.74	312.53	254.04	294.61	55.7807
316.65	2477.5	301.99	2285.13	315.4	265.37	301.97	250.194	303.8	65.9503	319.53	2086.35	313.5	272.318	297.88	55.525	323.87	2133.77	315.48	269.849	294.9	63.3976	322.37	2084.34	312.54	253.427	294.62	55.746
316.65	2475.75	301.99	2286.48	315.4	265.88	301.97	250.101	303.81	65.9145	319.54	2083.51	313.51	272.216	297.89	55.4921	323.88	2130.86	315.5	269.535	294.91	63.3461	322.38	2083.08	312.54	253.511	294.63	55.7068
316.67	2473.7	302	2284.15	315.42	265.139	301.98	249.767	303.82	65.8705	319.54	2085.03	313.52	272.022	297.9	55.4588	323.89	2129.38	315.51	269.276	294.92	63.3005	322.39	2080.76	312.54	253.343	294.64	55.6619
316.67	2472.14	302.01	2282.63	315.43	264.713	301.99	249.637	303.83	65.834	319.55	2080.65	313.53	271.699	297.91	55.4226	323.9	2126.7	315.51	269.433	294.93	63.2457	322.39	2081.84	312.55	253.427	294.65	55.6216
316.68	2470.02	302.02	2280.45	315.43	264.805	301.99	249.516	303.84	65.7928	319.55	2082.19	313.53	271.847	297.92	55.3929	323.9	2127.76	315.52	269.035	294.94	63.2023	322.4	2079.29	312.56	253.724	294.66	55.5912
316.68	2468.33	302.02	2281.89	315.43	264.981	302	249.376	303.86	65.7553	319.56	2079.4	313.54	271.32	297.92	55.3611	323.91	2124.05	315.52	269.156	294.95	63.1515	322.41	2076.34	312.57	253.604	294.67	55.555
316.7	2466.62	302.03	2278.84	315.44	264.416	302	249.246	303.87	65.713	319.57	2078.03	313.54	271.551	297.94	55.3322	323.91	2125.38	315.54	268.758	294.96	63.099	322.41	2077.91	312.58	253.381	294.68	55.5232
316.7	2465.24	302.04	2275.68	315.46	264.287	302.02	249.07	303.88	65.679	319.58	2075.41	313.56	270.857	297.94	55.2945	323.93	2122.34	315.54	268.915	294.97	63.0526	322.42	2074.94	312.59	253.455	294.69	55.4892
316.71	2463.56	302.04	2277.43	315.47	264.139	302.02	248.884	303.89	65.6386	319.58	2076.91	313.56	271.061	297.95	55.2667	323.93	2123.68	315.56	268.628	294.98	63.0123	322.43	2072.16	312.6	253.789	294.7	55.4588
316.71	2462.02	302.05	2273.01	315.49	263.935	302.03	248.689	303.9	65.6046	319.59	2074.2	313.57	270.395	297.96	55.2319	323.94	2118.33	315.57	268.471	295	62.9228	322.43	2073.42	312.61	253.409	294.71	55.4229
316.73	2460.19	302.05	2274.42	315.49	264.037	302.03	248.447	303.91	65.5681	319.6	2071.19	313.57	270.589	297.97	55.2041	323.94	2119.56	315.58	268.258	295	62.9641	322.44	2068.57	312.63	253.241	294.72	55.3501
316.73	2458.52	302.06	2271.78	315.51	263.777	302.05	248.345	303.91	65.5389	319.6	2072.58	313.58	270.182	297.98	55.1715	323.95	2116.74	315.59	268.018	295.02	62.8315	322.44	2069.81	312.64	253.093	294.72	55.3896
316.74	2456.73	302.07	2269.02	315.52	263.898	302.05	248.177	303.93	65.4991	319.61	2069.54	313.59	269.997	297.99	55.1426	323.96	2115.3	315.61	267.795	295.02	62.875	322.45	2065.82	312.65	252.916	294.73	55.3216
316.74	2455.55	302.07	2270.37	315.53	263.759	302.07	248.056	303.93	65.4623	319.62	2066.58	313.6	269.896	297.99	55.1122	323.97	2112.17	315.62	267.397	295.04	62.7825	322.45	2067.17	312.66	252.758	294.74	55.2904
316.75	2453.95	302.08	2266.49	315.54	263.11	302.07	247.833	303.95	65.4175	319.62	2068.22	313.61	269.822	298.01	55.0847	323.97	2113.6	315.62	267.601	295.05	62.7408	322.46	2064.27	312.67	252.619	294.75	55.2601
316.75	2452.37	302.08	2267.87	315.54	263.286	302.08	247.703	303.95	65.3806	319.63	2065.35	313.62	269.738	298.01	55.0536	323.98	2110.29	315.63	266.833	295.06	62.6879	322.47	2060.69	312.68	252.424	294.76	55.226
316.77	2450.45	302.09	2262.51	315.54	263.416	302.1	247.508	303.96	65.3347	319.64	2062.94	313.63	269.637	298.02	55.0214	323.99	2107.08	315.63	267.018	295.07	62.648	322.47	2062.38	312.69	252.183	294.77	55.1927
316.77	2448.96	302.09	2264.84	315.54	263.592	302.1	247.368	303.97	65.2996	319.64	2063.87	313.65	269.553	298.03	54.9921	323.99	2108.32	315.64	266.703	295.09	62.6012	322.48	2059.26	312.69	251.876	294.78	55.1576
316.78	2447.01	302.1	2261.55	315.54	263.731	302.12	247.238	303.98	65.2548	319.65	2061.38	313.66	269.498	298.04	54.9614	324	2105.91	315.65	266.574	295.1	62.5678	322.49	2056.32	312.69	251.69	294.79	55.1283
316.78	2445.52	302.11	2258.68	315.55	263.018	302.11	247.061	303.99	65.2205	319.66	2058.53	313.68	269.424	298.05	54.9269	324.01	2103.18	315.66	266.204	295.11	62.5181	322.49	2057.64	312.7	251.449	294.8	55.0953
316.8	2444.28	302.11	2260.16	315.56	262.545	302.15	246.81	304	65.1814	319.66	2060.19	313.69	268.998	298.06	54.8991	324.01	2104.39	315.66	266.379	295.12	62.475	322.5	2055.03	312.71	251.281	294.81	55.0657
316.8	2442.79	302.12	2256.64	315.56	262.675	302.14	246.699	304.01	65.1467	319.67	2055.87	313.69	269.156	298.07	54.8698	324.02	2101.77	315.67	266.018	295.13	62.4231	322.51	2050.37	312.71	251.012	294.82	55.0316
316.81	2440.64	302.12	2257.61	315.57	262.073	302.17	246.643	304.02	65.108	319.67	2057.34	313.7	268.971	298.08	54.8445	324.03	2100.58	315.68	265.935	295.14	62.3811	322.51	2053.53	312.72	251.393	294.83	55.0016
316.81	2439.11	302.13	2253.68	315.57	262.258	302.16	246.494	304.03	65.0726	319.68	2054.66	313.7	268.739	298.08	54.8196	324.04	2097.81	315.69	265.842	295.15	62.3306	322.52	2049.37	312.72	251.56	294.84	54.9668
316.83	2437.62	302.13	2255.2	315.58	261.822	302.18	246.327	304.04	65.0314	319.69	2051.91	313.71	269.008	298.1	54.8006	324.04	2099.11	315.7	265.398	295.16	62.29	322.53	2046.54	312.73	251.876	294.85	54.9335
316.83	2436.44	302.14	2252.46	315.59	261.637	302.18	246.327	304.05	64.9996	319.69	2053.23	313.71	269.128	298.1	54.761	324.05	2094.49	315.7	265.648	295.17	62.245	322.53	2047.8	312.74	251.894	294.86	54.9006
316.84	2434.71	302.15	2252.16	315.6	261.415	302.2	246.447	304.06	64.962	319.71	2049.29	313.72	268.767	298.11	54.7325	324.05	2096.07	315.72	265.194	295.18	62.2062	322.54	2044.88	312.75	251.978	294.87	54.8724
316.85	2433.35	302.16	2249	315.61	261.239	302.2	246.317	304.07	64.9287	319.71	2050.44	313.73	268.859	298.12	54.7021	324.06	2092.7	315.72	265.259	295.19	62.1601	322.55	2043.55	312.76	251.941	294.88	54.8101
316.85	2431.7	302.16	2250.7	315.62	260.942	302.22	246.168	304.08	64.8864	319.72	2046.86	313.73	268.971	298.13	54.6757	324.07	2091.35	315.73	264.981	295.2	62.1191	322.56	2041.02	312.77	252.183	294.88	54.8398
316.86	2430.29	302.17	2247.22	315.63	260.775	302.2	246.094	304.09	64.852	319.72	2048.06	313.74	268.693	298.14	54.6438	324.08	2088.47	315.73	265.148	295.21	62.0705	322.56	2042.11	312.77	252.136	294.89	54.7786
316.87	2428.59	302.17	2247.59	315.64	260.553	302.23	245.964	304.1	64.8076	319.73	2044.16	313.76	267.925	298.15	54.6185	324.08	2089.84	315.74	264.62	295.22	62.0302	322.57	2038.15	312.79	251.755	294.9	54.7482
316.87	2427.49	302.18	2245.93	315.66	260.377	302.23	245.805	304.11	64.7743	319.73	2045.33	313.76	268.498	298.15	54.5892	324.09	2085.63	315.75	264.805	295.24	61.9837	322.57	2039.53	312.79	251.449	294.91	54.7127
316.88	2426.01	302.19	2244.24	315.67	260.126	302.25	245.582	304.12	64.7345	319.74	2041.41	313.77	267.296	298.17	54.5673	324.09	2086.91	315.76	264.546	295.25	61.9442	322.58	2035.34	312.8	251.244	294.92	54.65
316.89	2424.63	302.2	2242.88	315.7	259.95	302.25	245.331	304.12	64.703	319.74	2042.78	313.78	267.12	298.17	54.5372	324.11	2083.16	315.76	264.731	295.26	61.8552	322.58	2036.46	312.8	251.086	294.92	54.6848
316.9	2423.07	302.21	2240.38	315.71	259.829	302.26	244.791	304.14	64.6582	319.75	2038.67	313.79	266.444	298.18	54.5083	324.11	2084.14	315.78	264.296	295.26	61.8962	322.59	2034.12	312.82	251.012	294.94	54.5885
316.91	2421.94	302.22	2237.32	315.73	259.663	302.27	244.708	304.14	64.6245	319.75	2039.77	313.79	266.907	298.19	54.4738	324.12	2081.15	315.78	264.407	295.28	61.8091	322.6	2031.57	312.81	250.826	294.94	54.6204
316.91	2421	302.22	2238.91	315.74	259.514	302.27	244.624	304.16	64.5851	319.76	2037.3	313.81	266.139	298.2	54.4471	324.12	2082.11	315.8	264.407	295.29	61.7677	322.6	2033.04	312.82	250.538	294.95	54.5621
316.92	2420.03	302.23	2236.21	315.75	259.357	302.29	244.503	304.16	64.5526	319.77	2035.23	313.81	266.259	298.21	54.4171	324.13	2077.69	315.8	264.166	295.3	61.7144	322.61	2028.89	312.82	250.324	294.96	54.5292
316.93	2418.75	302.24	2233.71	315.77	259.579	302.3	244.308	304.18	64.5077	319.77	2036.5	313.82	265.889	298.22	54.3841	324.13	2078.62	315.81	264	295.31	61.6744	322.61	2030.3	312.84	250.166	294.97	54.5068
316.93	2417.7	302.24	2235.01	315.77	259.403	302.31	244.475	304.19	64.4733	319.78	2034.17	313.83	265.991	298.23	54.3529	324.15	2075.3	315.81	264.24	295.32	61.6283	322.62	2026.38	312.84	249.934	294.98	54.4841
316.94	2416.36	302.25	2232.12	315.79	259.366	302.31	244.335	304.2	64.4288	319.79	2031.57	313.84	265.5	298.23	54.3299	324.15	2076.52	315.82	263.592	295.33	61.5876	322.62	2027.68	312.86	249.683	294.99	54.4541
316.95	2415.12	302.26	2228.05	315.79	259.496	302.33	244.14	304.21	64.3927	319.79	2032.83	313.85	265.268	298.25	54.2998	324.16	2074.31	315.83	263.425	295.34	61.543	322.63	2025.24	312.86	249.256	295	54.4211
316.96	2413.61	302.26	2230.8	315.8	258.819	302.33	244.01	304.22	64.3517	319.8	2029.93	313.85	265.713	298.25	54.2727	324.16	2075.22	315.83	263.583	295.35	61.5052	322.64	2022.36	312.88	248.642	295.01	54.3599
316.96	2412.54	302.27	2224.46	315.8	259.125	302.33	243.842	304.23	64.3181	319.81	2028.55	313.86	265.13	298.26	54.2415	324.17	2071.93	315.85	263.027	295.36	61.4623	322.64	2023.64	312.88	248.493	295.01	54.3925
316.97	2411.27	302.27	2226.88	315.81	258.012	302.34	243.73	304.24	64.2805	319.82	2025.93	313.87	264.768	298.27	54.2184	324.17	2073.01	315.85	263.166	295.37	61.4249	322.65	2019.77	312.89	248.372	295.03	54.2958
316.97	2410.11	302.28	2223.12	315.81	258.188	302.34	243.6	304.25	64.2479	319.82	2027.05	313.87	264.88	298.28	54.1913	324.18	2069.2	315.87	262.48	295.38	61.3806	322.65	2020.92	312.89	247.982	295.03	54.3284
316.98	2408.38	302.29	2220.1	315.81	259.227	302.35	243.488	304.26	64.2077	319.83	2024.5	313.87	265	298.28	54.166	324.18	2070.3	315.88	262.378	295.39	61.3428	322.66	2018.52	312.91	247.387	295.04	54.2698
316.99	2407.23	302.29	2221.46	315.82	257.706	302.35	243.051	304.26	64.1741	319.84	2023.25	313.9	264.574	298.29	54.1349	324.2	2065.49	315.9	262.286	295.4	61.2967	322.67	2017.39	312.9	247.201	295.05	54.236
317	2405.74	302.3	2218.73	315.82	257.919	302.38	242.856	304.28	64.1397	319.85	2020.79	313.9	264.666	298.3	54.107	324.2	2066.67	315.91	262.184	295.42	61.256	322.68	2014.63	312.92	247.089	295.06	54.2064
317	2404.58	302.31	2216.18	315.82	258.541	302.37	242.818	304.28	64.106	319.85	2022.04	313.91	264.426	298.31	54.0759	324.21	2063.22	315.92	261.822	295.43	61.2131	322.68	2015.92	312.93	247.145	295.07	54.1756
317.01	2403.21	302.31	2217.57	315.82	258.939	302.39	242.753	304.3	64.0662	319.86	2018.12	313.93	264.083	298.31	54.051	324.21	2064.2	315.93	261.498	295.44	61.1754	322.69	2013.44	312.96	247.48	295.08	54.1484
317.01	2402.16	302.32	2214.84	315.83	257.511	302.4	242.623	304.3	64.0304	319.86	2019.36	313.93	264.509	298.33	54.0194	324.22	2061.04	315.93	261.674	295.45	61.1296	322.7	2012.42	312.96	247.08	295.09	54.1165
317.03	2400.71	302.33	2212.27	315.85	257.214	302.42	242.39	304.32	63.9877	319.87	2015.49	313.94	264.305	298.33	53.9926	324.22	2062.14	315.94	261.266	295.46	61.0893	322.71	2011.51	312.99	246.633	295.1	54.0861
317.03	2399.05	302.33	2213.32	315.86	257.075	302.43	242.194	304.32	63.9532	319.87	2016.72	313.95	262.981	298.35	53.9582	324.23	2058.27	315.95	261.025	295.47	61.0438	322.71	2012.59	312.99	246.512	295.11	54.0509
317.04	2397.68	302.34	2210.42	315.88	256.732	302.43	241.999	304.34	63.9171	319.88	2014.08	313.95	263.166	298.35	53.9333	324.23	2059.57	315.96	260.849	295.48	61.0042	322.72	2009.96	313.01	246.41	295.12	54.0249
317.05	2396.35	302.35	2207.62	315.9	256.555	302.44	241.869	304.35	63.8862	319.89	2011.34	313.95	263.435	298.37	53.9002	324.24	2055.33	315.97	260.664	295.49	60.9577	322.72	2010.39	313.01	245.982	295.13	53.9926
317.06	2394.49	302.35	2209.08	315.91	256.574	302.44	241.757	304.36	63.8537	319.89	2012.83	313.95	263.629	298.37	53.8735	324.24	2056.73	315.98	260.516	295.51	60.873	322.73	2008.57	313.02	245.35	295.14	53.9318
317.06	2392.68	302.36	2206.34	315.93	256.184	302.44	241.654	304.37	63.8189	319.9	2009.85	313.95	263.898	298.38	53.8398	324.25	2053.46	315.99	260.321	295.51	60.9166	322.74	2007.41	313.01	245.089	295.14	53.9644
317.08	2390.64	302.37	2202.88	315.93	256.249	302.45	241.71	304.38	63.7802	319.91	2008.47	313.98	262.916	298.39	53.817	324.26	2052.4	316	260.191	295.53	60.8269	322.75	2005.24	313.02	244.968	295.15	53.9043
317.08	2389.05	302.37	2204.17	315.93	256.286	302.45	241.636	304.39	63.7468	319.92	2006.11	313.98	263.101	298.4	53.7851	324.27	2049.53	316.03	259.561	295.54	60.7829	322.75	2006.26	313.02	245.154	295.16	53.8728
317.09	2386.78	302.38	2200.25	315.94	256.175	302.46	241.617	304.4	63.7114	319.92	2007.3	313.99	262.61	298.4	53.7576	324.27	2050.85	316.03	259.792	295.55	60.7444	322.76	2002.89	313.03	245.35	295.17	53.846
317.09	2385.08	302.38	2201.51	315.95	256.045	302.47	241.533	304.41	63.6798	319.93	2005.12	314	262.425	298.42	53.7253	324.28	2044.99	316.03	259.959	295.56	60.7018	322.77	2000.84	313.03	245.359	295.18	53.8119
317.1	2382.98	302.39	2198.23	315.96	256.063	302.48	241.356	304.42	63.64	319.94	2002.63	314.02	262.388	298.42	53.6989	324.28	2046.46	316.04	259.236	295.58	60.6219	322.77	2001.92	313.04	245.694	295.19	53.7814
317.1	2381.36	302.4	2195.78	315.97	255.702	302.49	241.273	304.43	63.606	319.94	2003.82	314.03	262.258	298.43	53.6656	324.28	2047.8	316.04	259.431	295.58	60.6644	322.78	1999.39	313.04	245.787	295.2	53.7462
317.12	2379.09	302.4	2197.17	315.97	255.934	302.5	241.17	304.44	63.5647	319.95	2000.1	314.05	262.11	298.44	53.6293	324.29	2043.82	316.05	258.949	295.6	60.5397	322.79	1997.03	313.04	246.047	295.21	53.7228
317.12	2377.35	302.41	2194.58	315.98	255.618	302.51	240.984	304.45	63.5324	319.95	2001.27	314.06	261.6	298.45	53.6029	324.3	2041.24	316.05	259.06	295.6	60.5833	322.79	1998.14	313.05	245.75	295.22	53.6608
317.13	2375.38	302.42	2190.82	315.99	255.544	302.52	240.527	304.46	63.5089	319.96	1997.99	314.06	262.026	298.45	53.5779	324.3	2042.43	316.07	258.531	295.62	60.4564	322.8	1994.27	313.06	245.135	295.22	53.6901
317.13	2373.96	302.42	2192.08	316	255.052	302.53	240.378	304.47	63.4756	319.96	1998.74	314.08	261.452	298.47	53.5471	324.31	2039.9	316.07	258.587	295.62	60.4997	322.8	1995.56	313.06	244.81	295.23	53.6274
317.14	2372.23	302.43	2188.02	316	255.349	302.54	240.071	304.48	63.4372	319.97	1996.54	314.09	261.396	298.47	53.5222	324.32	2037.48	316.07	258.772	295.64	60.3742	322.81	1992.86	313.05	244.587	295.24	53.5984
317.14	2370.95	302.43	2189.35	316	255.47	302.54	239.866	304.49	63.4031	319.98	1994.08	314.1	260.97	298.49	53.4925	324.32	2038.8	316.09	258.429	295.64	60.4189	322.82	1991.46	313.07	244.512	295.25	53.5662
317.16	2370.03	302.44	2183.76	316.01	255.219	302.55	239.708	304.5	63.369	319.98	1995.39	314.1	261.294	298.49	53.466	324.33	2035.17	316.1	258.105	295.66	60.2916	322.83	1988.98	313.07	244.242	295.26	53.539
317.16	2368.54	302.44	2185.16	316.02	254.783	302.55	239.577	304.51	63.3342	319.99	1992.91	314.11	261.229	298.51	53.4356	324.33	2036.4	316.1	258.253	295.66	60.336	322.83	1990.12	313.08	244.065	295.27	53.506
317.17	2366.43	302.45	2180.9	316.02	254.894	302.57	239.559	304.52	63.2929	320	1991.44	314.11	260.822	298.51	53.4077	324.34	2032.85	316.12	257.789	295.68	60.2076	322.84	1987.77	313.1	243.963	295.28	53.477
317.17	2364.86	302.45	2182.22	316.04	254.43	302.57	239.456	304.53	63.2545	320.01	1989.15	314.12	260.803	298.52	53.3762	324.34	2034.21	316.12	257.984	295.68	60.252	322.85	1985.48	313.11	244.047	295.29	53.4455
317.19	2362.45	302.46	2179.4	316.04	254.588	302.59	239.316	304.54	63.2147	320.01	1990.4	314.13	261.387	298.53	53.2807	324.35	2031.47	316.13	257.724	295.7	60.1738	322.85	1986.75	313.12	244.354	295.3	53.4143
317.19	2360.77	302.47	2176.66	316.06	254.254	302.6	239.121	304.55	63.1791	320.02	1986.69	314.13	260.914	298.54	53.2642	324.36	2028.61	316.14	257.697	295.71	60.1414	322.86	1984.27	313.14	244.289	295.31	53.3787
317.2	2358.24	302.47	2178.16	316.08	253.91	302.62	238.934	304.56	63.1407	320.02	1987.96	314.13	261.099	298.54	53.2407	324.36	2029.95	316.15	257.363	295.73	60.0607	322.87	1982.02	313.15	244.196	295.32	53.3468
317.2	2356.58	302.48	2173.88	316.08	254.021	302.62	239	304.57	63.1081	320.03	1983.88	314.14	261.266	298.55	53.2117	324.37	2026.97	316.15	257.539	295.73	60.1058	322.87	1983.15	313.15	243.758	295.33	53.3152
317.22	2354.57	302.48	2175.36	316.09	253.687	302.64	238.739	304.58	63.0697	320.03	1985.26	314.15	260.886	298.56	53.1919	324.38	2023.69	316.16	257.26	295.75	59.9795	322.88	1979.33	313.16	243.218	295.34	53.2811
317.22	2353.14	302.49	2171.52	316.1	253.529	302.65	238.599	304.59	63.0378	320.04	1981.53	314.15	261.053	298.57	53.1677	324.38	2025.56	316.17	256.973	295.75	60.0206	322.88	1980.58	313.17	243.246	295.35	53.2088
317.23	2351.17	302.49	2172.78	316.11	253.167	302.65	238.245	304.6	63.0063	320.04	1982.74	314.16	260.126	298.57	53.146	324.39	2022.34	316.17	257.019	295.77	59.8995	322.89	1976.63	313.17	243.032	295.35	53.2367
317.23	2349.86	302.5	2169.15	316.11	253.316	302.65	238.161	304.61	62.978	320.05	1980.4	314.17	259.95	298.58	53.1233	324.4	2020.96	316.18	256.713	295.77	59.9435	322.89	1977.88	313.18	242.827	295.37	53.1487
317.24	2347.94	302.5	2170.74	316.12	252.814	302.67	238.077	304.62	62.9417	320.06	1978.38	314.18	259.885	298.59	53.1009	324.41	2018.19	316.18	256.899	295.79	59.8197	322.9	1975.23	313.18	242.613	295.37	53.1765
317.25	2346.43	302.51	2167.93	316.12	252.972	302.66	238.03	304.63	62.9073	320.06	1979.11	314.19	259.56	298.6	53.0767	324.41	2019.68	316.19	256.5	295.79	59.8609	322.91	1972.94	313.19	242.446	295.38	53.1171
317.26	2344.45	302.52	2165.55	316.12	253.037	302.67	237.928	304.64	62.8692	320.07	1977.06	314.2	258.819	298.61	53.0525	324.42	2016.7	316.2	256.37	295.81	59.7812	322.91	1974.17	313.19	242.222	295.39	53.0896
317.26	2343.07	302.52	2166.57	316.15	252.582	302.67	237.62	304.65	62.837	320.08	1975.83	314.21	258.652	298.62	53.0246	324.43	2013.96	316.21	256.017	295.82	59.7357	322.92	1971.92	313.2	242.241	295.4	53.0562
317.27	2342.05	302.53	2164.22	316.15	252.694	302.68	237.508	304.66	62.8047	320.09	1973.41	314.21	258.698	298.63	53.0132	324.43	2015.19	316.22	256.184	295.83	59.6956	322.93	1969.27	313.2	242.464	295.41	53.0253
317.27	2340.45	302.54	2161.56	316.17	252.526	302.68	237.396	304.67	62.7721	320.09	1974.53	314.23	258.411	298.64	52.9853	324.44	2012.87	316.23	255.674	295.84	59.6509	322.93	1970.48	313.22	242.055	295.42	52.9934
317.28	2338.36	302.54	2163.09	316.17	252.563	302.71	237.452	304.68	62.7275	320.1	1971.33	314.23	258.55	298.65	52.9651	324.45	2010.39	316.24	255.915	295.85	59.6119	322.94	1966.8	313.24	241.906	295.43	52.9666
317.29	2336.99	302.55	2160.25	316.19	252.275	302.7	237.257	304.69	62.6938	320.1	1971.96	314.24	258.197	298.65	52.9435	324.45	2011.75	316.26	255.265	295.86	59.566	322.94	1968.01	313.25	241.496	295.44	52.9075
317.3	2335.09	302.56	2157.74	316.19	252.48	302.72	237.061	304.7	62.656	320.11	1970.19	314.24	258.299	298.66	52.9225	324.46	2008.94	316.26	255.414	295.87	59.5296	322.95	1966.35	313.26	240.937	295.44	52.9351
317.3	2333.52	302.56	2158.78	316.21	252.201	302.71	236.94	304.71	62.623	320.12	1969.26	314.25	258.095	298.67	52.9009	324.47	2005.87	316.27	255.089	295.88	59.487	322.96	1964.99	313.27	240.76	295.46	52.8492
317.31	2331.51	302.57	2156.35	316.21	252.22	302.74	236.819	304.72	62.5868	320.13	1966.93	314.26	257.863	298.68	52.8781	324.47	2007.17	316.28	254.959	295.89	59.4524	322.97	1961.15	313.28	240.639	295.46	52.8778
317.32	2330.36	302.58	2153.79	316.21	252.21	302.74	236.837	304.73	62.5545	320.13	1967.97	314.27	257.659	298.69	52.8539	324.48	2004.53	316.28	255.135	295.9	59.4179	322.97	1962.21	313.3	240.509	295.48	52.7889
317.33	2327.94	302.58	2155.15	316.22	252.136	302.76	236.66	304.74	62.5168	320.14	1964.52	314.29	257.381	298.7	52.8315	324.48	2005.46	316.29	254.606	295.92	59.3469	322.98	1957.76	313.3	240.388	295.48	52.8194
317.33	2326.63	302.59	2151.47	316.23	251.978	302.76	236.585	304.75	62.4849	320.14	1965.61	314.29	257.474	298.7	52.808	324.49	2003.58	316.29	254.848	295.92	59.3811	322.98	1959.57	313.31	240.285	295.49	52.7295
317.34	2324.78	302.59	2152.72	316.24	251.755	302.77	236.38	304.76	62.4417	320.15	1962.29	314.31	257.186	298.71	52.7874	324.5	2002.84	316.31	254.254	295.93	59.3123	322.99	1955.54	313.31	240.192	295.49	52.7552
317.34	2323.14	302.6	2149.1	316.25	251.551	302.78	236.324	304.76	62.4105	320.15	1963.3	314.31	257.288	298.72	52.7794	324.51	2000.71	316.31	254.458	295.94	59.2678	322.99	1956.62	313.33	240.304	295.51	52.6726
317.35	2321.03	302.6	2150.42	316.26	251.356	302.78	236.231	304.78	62.3731	320.16	1959.92	314.33	256.889	298.73	52.7574	324.51	2001.87	316.32	254.458	295.95	59.2292	323	1952.49	313.33	240.565	295.51	52.6994
317.35	2319.45	302.61	2146.61	316.27	251.049	302.8	236.129	304.78	62.3401	320.16	1961	314.33	257.019	298.74	52.7368	324.52	2000.25	316.33	254.189	295.96	59.1837	323	1953.85	313.35	240.332	295.53	52.6428
317.36	2317.6	302.61	2147.97	316.27	251.124	302.8	236.026	304.79	62.2987	320.17	1957.31	314.34	256.797	298.75	52.7144	324.53	1999.35	316.34	253.938	295.97	59.1451	323.01	1951.07	313.35	240.183	295.54	52.6156
317.37	2316.38	302.62	2144.17	316.28	250.557	302.81	235.802	304.8	62.2657	320.17	1958.51	314.35	256.574	298.76	52.6869	324.54	1998.37	316.35	253.845	295.98	59.1017	323.02	1948.81	313.36	240.006	295.55	52.5613
317.38	2314.79	302.62	2145.45	316.28	250.659	302.81	235.643	304.81	62.2258	320.18	1956.08	314.35	256.741	298.77	52.663	324.55	1996.24	316.36	253.594	295.99	59.0646	323.02	1950.08	313.37	239.847	295.55	52.5855
317.38	2313.59	302.63	2141.4	316.28	250.817	302.82	235.494	304.82	62.196	320.19	1954.05	314.36	256.24	298.77	52.6347	324.55	1997.47	316.36	253.733	296	59.018	323.03	1947.64	313.37	239.745	295.57	52.5003
317.39	2312.02	302.63	2142.9	316.29	250.269	302.83	235.345	304.83	62.1685	320.19	1955.41	314.36	256.388	298.79	52.6142	324.56	1995.02	316.37	253.418	296.01	58.9775	323.04	1946.13	313.38	239.596	295.57	52.5319
317.39	2310.69	302.64	2138.8	316.29	250.362	302.83	235.224	304.84	62.1358	320.2	1953.03	314.37	256.073	298.79	52.5855	324.57	1992.54	316.37	253.501	296.02	58.9345	323.04	1947.21	313.38	239.381	295.58	52.4658
317.4	2308.62	302.64	2140.23	316.31	250.036	302.84	234.991	304.85	62.081	320.21	1952.06	314.38	255.702	298.8	52.5624	324.57	1993.62	316.39	252.87	296.03	58.9087	323.05	1945.16	313.39	239.223	295.59	52.4361
317.41	2306.92	302.65	2136.52	316.31	250.166	302.85	234.879	304.85	62.0516	320.22	1949.26	314.38	255.906	298.81	52.5374	324.58	1991.07	316.39	252.963	296.04	58.866	323.06	1943.18	313.4	239.055	295.6	52.3754
317.42	2304.85	302.65	2137.71	316.33	249.627	302.86	234.776	304.87	62.0212	320.22	1950.53	314.39	255.544	298.82	52.5139	324.59	1988.4	316.41	252.48	296.05	58.8303	323.06	1944.32	313.4	238.897	295.6	52.4034
317.42	2303.33	302.66	2135.54	316.34	249.469	302.87	234.655	304.87	61.9936	320.23	1946.93	314.4	255.395	298.83	52.4882	324.59	1989.82	316.41	252.74	296.07	58.7534	323.07	1940.63	313.41	238.552	295.62	52.3119
317.43	2300.74	302.67	2134.28	316.35	249.256	302.88	234.646	304.88	61.9533	320.23	1948.2	314.4	255.414	298.84	52.4661	324.6	1987.29	316.42	252.322	296.07	58.7902	323.07	1942.05	313.41	238.114	295.62	52.3413
317.43	2299.28	302.68	2131.77	316.37	248.902	302.89	234.515	304.89	61.9246	320.24	1944.62	314.41	255.275	298.84	52.4412	324.61	1985.95	316.43	252.266	296.09	58.7162	323.08	1938.97	313.41	237.872	295.63	52.281
317.44	2297.36	302.68	2133.09	316.37	249.098	302.91	234.216	304.9	61.8883	320.24	1945.87	314.42	254.857	298.85	52.4209	324.62	1983.49	316.44	252.145	296.1	58.6805	323.08	1940.28	313.42	237.853	295.64	52.2524
317.44	2296.03	302.69	2129.47	316.38	248.54	302.91	234.067	304.91	61.8596	320.25	1943.54	314.42	255.015	298.86	52.396	324.62	1984.81	316.45	251.82	296.11	58.6368	323.09	1937.85	313.42	237.788	295.65	52.1903
317.45	2294.83	302.69	2130.68	316.39	248.763	302.93	234.011	304.92	61.8244	320.26	1941.23	314.43	254.597	298.87	52.4445	324.63	1982.43	316.45	251.95	296.12	58.5963	323.1	1936.38	313.43	237.816	295.65	52.2178
317.46	2293.79	302.7	2128.45	316.41	248.419	302.94	233.909	304.93	61.7979	320.26	1942.29	314.44	254.486	298.88	52.4056	324.64	1980.04	316.47	251.625	296.13	58.546	323.1	1937.28	313.43	237.713	295.67	52.1344
317.47	2292.7	302.71	2127.17	316.41	248.456	302.95	233.769	304.94	61.7631	320.27	1939.77	314.45	254.216	298.89	52.3784	324.64	1981.12	316.48	251.551	296.14	58.5103	323.11	1934.96	313.44	237.732	295.67	52.1591
317.47	2291.58	302.72	2124.5	316.44	248.196	302.96	233.638	304.95	61.7326	320.28	1937.46	314.46	253.706	298.9	52.3537	324.65	1978.74	316.49	251.337	296.15	58.4702	323.12	1932.71	313.45	237.769	295.68	52.0716
317.48	2290.23	302.72	2125.94	316.44	248.345	302.97	233.414	304.95	61.6908	320.28	1938.69	314.46	254.021	298.91	52.3262	324.66	1976.5	316.5	251.198	296.16	58.4359	323.12	1933.99	313.46	237.984	295.68	52.1003
317.49	2288.64	302.73	2123.33	316.45	248.038	302.97	233.507	304.96	61.657	320.29	1936.43	314.47	253.733	298.91	52.2979	324.66	1977.75	316.52	250.77	296.17	58.3925	323.13	1930.49	313.47	238.161	295.7	52.0139
317.5	2286.88	302.74	2120.32	316.46	248.103	302.97	233.274	304.97	61.6157	320.3	1935.8	314.47	253.845	298.93	52.27	324.67	1975.46	316.52	250.947	296.18	58.3572	323.13	1931.72	313.49	238.002	295.7	52.0422
317.5	2285.31	302.74	2121.84	316.47	248.094	302.98	233.05	304.98	61.5819	320.31	1933.68	314.48	253.446	298.93	52.2351	324.68	1972.31	316.53	250.399	296.19	58.3189	323.15	1928.23	313.49	237.834	295.72	51.954
317.51	2283.57	302.75	2117.81	316.48	247.08	302.99	232.733	304.99	61.5394	320.31	1934.8	314.48	253.576	298.94	52.2079	324.68	1973.11	316.53	250.52	296.2	58.2846	323.15	1929.48	313.51	237.685	295.72	51.9812
317.52	2282.15	302.75	2119	316.48	247.331	303	232.5	305	61.5114	320.32	1931.07	314.49	253.297	298.95	52.176	324.69	1969.82	316.53	250.622	296.21	58.2398	323.16	1925.55	313.52	237.555	295.73	51.9253
317.53	2280.35	302.76	2115.36	316.48	247.517	303	232.201	305.01	61.4737	320.32	1932.3	314.5	253.158	298.96	52.1532	324.69	1970.97	316.54	250.139	296.22	58.2026	323.16	1926.98	313.53	237.396	295.74	51.8992
317.53	2279.01	302.76	2116.49	316.48	247.722	303.01	232.136	305.02	61.4435	320.34	1928.7	314.51	253.204	298.97	52.1407	324.7	1968.38	316.54	250.241	296.23	58.1624	323.17	1922.97	313.53	237.35	295.75	51.85
317.54	2276.66	302.77	2113.15	316.48	247.917	303.01	232.042	305.03	61.4043	320.34	1930.08	314.53	253.111	298.98	52.1032	324.71	1965.21	316.55	249.822	296.24	58.1282	323.17	1924.37	313.55	237.275	295.75	51.8746
317.54	2275.6	302.77	2114.16	316.49	246.857	303.03	231.706	305.04	61.372	320.35	1926.07	314.54	252.721	298.98	52.0745	324.71	1967.04	316.55	250.027	296.25	58.0873	323.19	1920.34	313.55	236.94	295.77	51.7923
317.55	2274.14	302.78	2110.96	316.5	246.038	303.03	231.65	305.05	61.3364	320.35	1927.62	314.56	252.628	298.99	52.0492	324.72	1962.7	316.56	249.544	296.26	58.0625	323.19	1921.89	313.55	236.902	295.77	51.8176
317.56	2272.96	302.78	2111.95	316.5	246.206	303.05	231.641	305.06	61.3069	320.36	1923.14	314.57	252.387	299	52.0168	324.72	1964.06	316.57	249.683	296.27	58.0224	323.2	1916.65	313.57	236.846	295.79	51.7298
317.56	2271.74	302.79	2108.81	316.5	246.55	303.04	231.706	305.07	61.2699	320.36	1924.56	314.57	252.536	299.01	51.9907	324.73	1961.58	316.58	249.19	296.28	57.987	323.2	1919.2	313.57	236.697	295.79	51.7588
317.57	2270.96	302.79	2109.83	316.52	245.964	303.05	231.688	305.08	61.2401	320.37	1920.55	314.59	252.285	299.02	51.9625	324.74	1960.29	316.59	249.358	296.29	57.9502	323.21	1914.13	313.58	236.501	295.81	51.6673
317.58	2269.93	302.8	2106.66	316.54	245.657	303.06	231.613	305.09	61.2034	320.37	1921.98	314.6	252.21	299.03	51.9397	324.75	1957.09	316.6	248.986	296.3	57.9141	323.21	1915.64	313.58	236.362	295.81	51.6934
317.58	2268.69	302.8	2107.71	316.55	245.461	303.07	231.492	305.1	61.1751	320.39	1918.18	314.61	251.857	299.03	51.911	324.75	1959.45	316.6	249.116	296.31	57.8626	323.22	1912.08	313.6	236.156	295.82	51.6114
317.59	2267.28	302.81	2104.17	316.57	245.08	303.08	231.351	305.11	61.1398	320.39	1919.41	314.61	251.978	299.04	51.8875	324.76	1954.37	316.62	248.986	296.32	57.8261	323.22	1913.25	313.6	235.989	295.82	51.636
317.6	2265.86	302.81	2105.32	316.57	245.34	303.08	231.249	305.12	61.1082	320.4	1915.79	314.62	251.068	299.05	51.8606	324.76	1955.75	316.63	248.856	296.33	57.7791	323.23	1909.71	313.6	235.709	295.84	51.5518
317.6	2264.36	302.82	2102.77	316.57	245.424	303.09	231.193	305.13	61.0788	320.4	1917.1	314.62	251.328	299.06	51.8364	324.77	1953.17	316.64	248.856	296.34	57.7473	323.23	1910.9	313.62	235.457	295.84	51.5816
317.61	2263.62	302.83	2100.73	316.58	245.247	303.09	231.137	305.13	61.0519	320.41	1913.38	314.62	251.467	299.07	51.793	324.78	1950.58	316.65	248.596	296.35	57.7054	323.25	1907.73	313.62	235.233	295.86	51.493
317.62	2262.68	302.83	2101.94	316.6	244.847	303.12	230.969	305.14	61.0181	320.41	1914.67	314.62	251.727	299.08	51.7691	324.78	1951.85	316.65	248.651	296.36	57.6692	323.25	1908.83	313.64	235.112	295.86	51.5198
317.62	2262.01	302.84	2098.19	316.61	244.922	303.12	230.801	305.15	60.9894	320.42	1910.96	314.63	250.873	299.08	51.7394	324.79	1947.32	316.67	248.233	296.37	57.6006	323.26	1904.71	313.62	235.037	295.88	51.4301
317.63	2260.84	302.84	2099.67	316.61	244.875	303.13	230.605	305.16	60.9527	320.42	1912.28	314.63	251.226	299.1	51.7155	324.79	1948.5	316.67	248.503	296.37	57.632	323.26	1905.62	313.65	234.907	295.88	51.4577
317.64	2260.05	302.85	2097	316.62	244.829	303.14	230.483	305.17	60.9203	320.44	1908.63	314.64	250.548	299.1	51.6879	324.8	1944.49	316.68	248.354	296.39	57.5276	323.26	1906.76	313.63	234.73	295.89	51.3967
317.64	2259.05	302.86	2095.61	316.62	244.875	303.14	230.39	305.18	60.8854	320.44	1909.93	314.64	250.733	299.11	51.6625	324.8	1945.79	316.69	248.121	296.39	57.563	323.27	1902.39	313.66	234.627	295.9	51.3702
317.65	2258.14	302.87	2093.43	316.62	244.894	303.15	230.268	305.19	60.8542	320.45	1905.88	314.65	250.445	299.12	51.6346	324.81	1942.87	316.7	247.759	296.41	57.4674	323.27	1903.49	313.66	234.58	295.91	51.3224
317.66	2257.22	302.87	2094.58	316.63	244.763	303.16	230.044	305.2	60.8128	320.45	1907.08	314.67	250.334	299.13	51.6103	324.82	1941.79	316.72	247.117	296.41	57.4948	323.28	1900.32	313.67	234.478	295.91	51.3404
317.66	2256.61	302.88	2092.19	316.64	244.615	303.16	229.895	305.21	60.7822	320.46	1903.14	314.68	250.185	299.13	51.5864	324.83	1939.4	316.72	247.591	296.43	57.386	323.29	1897.75	313.68	234.291	295.93	51.2716
317.67	2256.03	302.89	2089.53	316.64	244.717	303.16	229.792	305.23	60.7488	320.46	1904.86	314.7	250.018	299.15	51.5673	324.83	1940.5	316.72	247.703	296.43	57.4295	323.29	1899.2	313.67	234.142	295.93	51.2948
317.68	2255.59	302.89	2090.68	316.65	244.289	303.17	229.671	305.23	60.7171	320.47	1900.73	314.71	249.925	299.15	51.5408	324.84	1937.12	316.74	247.377	296.45	57.3115	323.3	1896.63	313.69	233.937	295.94	51.2219
317.68	2254.87	302.9	2086.72	316.66	243.917	303.18	229.596	305.24	60.6804	320.47	1902.06	314.72	249.757	299.16	51.532	324.84	1938.11	316.75	246.624	296.45	57.3462	323.3	1896.68	313.7	233.834	295.94	51.2451
317.7	2254.05	302.9	2088.06	316.67	243.712	303.18	229.521	305.25	60.6466	320.48	1899.82	314.74	249.618	299.17	51.5026	324.85	1935.82	316.75	246.764	296.47	57.2418	323.31	1894.44	313.7	233.713	295.96	51.1686
317.7	2253	302.91	2085.29	316.68	243.367	303.19	229.363	305.26	60.6092	320.49	1898.51	314.75	249.395	299.18	51.4776	324.86	1934.63	316.75	246.968	296.47	57.2739	323.31	1895.62	313.72	233.769	295.96	51.1936
317.71	2252.06	302.92	2082.92	316.7	243.107	303.19	229.288	305.27	60.5764	320.5	1896.2	314.76	249.256	299.18	51.4489	324.87	1932.32	316.76	245.964	296.49	57.1677	323.32	1892.71	313.71	233.582	295.98	51.1164
317.71	2251.06	302.92	2084.2	316.72	242.651	303.2	229.288	305.28	60.5408	320.5	1897.45	314.77	249.116	299.2	51.422	324.87	1933.36	316.76	246.206	296.49	57.1998	323.33	1890.41	313.72	233.545	295.98	51.1403
317.72	2250.04	302.93	2080.54	316.72	242.883	303.21	229.176	305.28	60.5092	320.51	1893.96	314.78	249.06	299.2	51.393	324.88	1930.19	316.76	246.41	296.5	57.1301	323.33	1891.59	313.73	233.498	295.99	51.0877
317.72	2248.45	302.93	2081.99	316.73	242.632	303.22	229.017	305.29	60.4732	320.51	1895.19	314.79	248.791	299.22	51.3676	324.88	1931.14	316.77	245.731	296.51	57.0954	323.34	1888.21	313.75	233.414	296	51.0649
317.73	2247.06	302.94	2077.75	316.74	242.53	303.22	228.97	305.3	60.439	320.52	1893.01	314.79	248.875	299.22	51.34	324.89	1928.79	316.77	245.843	296.52	57.053	323.35	1885.63	313.76	233.293	296.01	51.0365
317.73	2245.24	302.94	2079.26	316.76	242.511	303.24	228.942	305.31	60.4019	320.53	1891.81	314.8	248.735	299.23	51.3183	324.9	1926.35	316.78	245.629	296.53	57.0154	323.35	1886.92	313.75	233.172	296.02	51.0115
317.75	2243.86	302.95	2075.26	316.78	242.101	303.24	228.802	305.32	60.3728	320.54	1889.48	314.81	248.503	299.24	51.2907	324.9	1927.63	316.79	245.443	296.54	56.9785	323.36	1883.1	313.76	233.115	296.03	50.9589
317.75	2242.03	302.95	2076.58	316.78	242.306	303.26	228.559	305.33	60.3481	320.54	1890.73	314.81	248.614	299.25	51.2657	324.91	1924.18	316.81	245.312	296.55	56.9456	323.36	1884.37	313.76	232.826	296.03	50.9843
317.76	2240.95	302.96	2073.05	316.79	241.775	303.26	228.391	305.34	60.319	320.55	1886.27	314.82	248.317	299.25	51.2326	324.91	1925.27	316.82	245.21	296.56	56.9066	323.37	1882.05	313.78	232.696	296.04	50.9261
317.76	2239.58	302.96	2074.24	316.79	241.98	303.27	228.195	305.35	60.2855	320.55	1888.32	314.82	248.419	299.27	51.208	324.92	1923.27	316.83	245.126	296.57	56.8729	323.38	1879.53	313.78	232.546	296.05	50.9026
317.77	2238.58	302.97	2071.36	316.81	241.245	303.28	228.12	305.36	60.2546	320.56	1885.3	314.83	248.056	299.27	51.1826	324.93	1920.68	316.84	245.071	296.59	56.8006	323.38	1880.63	313.79	232.332	296.06	50.8765
317.78	2237.23	302.97	2072.73	316.81	241.431	303.29	227.971	305.37	60.2291	320.57	1881.83	314.83	248.168	299.28	51.1601	324.93	1921.98	316.86	245.061	296.59	56.8338	323.39	1878.37	313.78	232.248	296.07	50.857
317.79	2236.06	302.98	2069.2	316.81	241.72	303.29	227.746	305.37	60.1979	320.57	1883.11	314.84	247.898	299.29	51.1359	324.94	1919.17	316.87	244.931	296.61	56.7312	323.4	1877.33	313.8	232.154	296.08	50.8249
317.79	2234.53	302.98	2070.35	316.82	241.151	303.3	227.438	305.39	60.172	320.57	1884.07	314.85	247.601	299.3	51.1108	324.94	1919.58	316.88	244.643	296.61	56.7641	323.4	1877.34	313.82	232.061	296.09	50.8003
317.8	2233.03	302.99	2066.77	316.83	241.04	303.31	227.363	305.39	60.1404	320.58	1880.87	314.85	247.666	299.31	51.0656	324.95	1918.12	316.88	244.754	296.63	56.661	323.41	1875.22	313.83	231.865	296.1	50.7734
317.8	2231.03	302.99	2068.12	316.84	240.63	303.32	227.41	305.4	60.1051	320.59	1879.87	314.86	247.415	299.32	51.0424	324.96	1916.87	316.89	244.382	296.63	56.6932	323.41	1876.34	313.83	231.79	296.11	50.7477
317.81	2229.56	303	2065.63	316.84	240.816	303.33	227.317	305.41	60.0752	320.6	1875.53	314.86	247.545	299.32	51.0196	324.96	1917.32	316.89	244.503	296.65	56.5898	323.42	1874.32	313.84	231.65	296.12	50.6925
317.81	2227.92	303.01	2063.48	316.85	240.471	303.34	227.074	305.42	60.0389	320.6	1877.61	314.87	247.164	299.34	50.9971	324.97	1916	316.9	243.507	296.65	56.6296	323.43	1872.41	313.84	231.473	296.12	50.7189
317.83	2226.6	303.01	2064.44	316.87	240.49	303.34	226.915	305.43	60.0112	320.6	1878.78	314.87	247.275	299.34	50.9714	324.98	1914.17	316.9	243.972	296.67	56.5153	323.43	1873.27	313.86	231.323	296.13	50.6656
317.83	2224.64	303.02	2062.12	316.87	240.639	303.36	226.765	305.44	59.9763	320.61	1876.67	314.88	246.987	299.35	50.9475	324.98	1915.03	316.9	244.27	296.67	56.5507	323.44	1871.54	313.86	231.155	296.14	50.6431
317.84	2223.07	303.03	2059.63	316.88	240.145	303.36	226.691	305.45	59.9446	320.62	1873.4	314.89	246.875	299.36	50.9162	324.99	1912.94	316.91	243.107	296.69	56.4436	323.45	1869.61	313.87	231.034	296.15	50.5938
317.84	2220.97	303.03	2061.01	316.88	240.546	303.39	226.513	305.46	59.9104	320.62	1874.53	314.9	246.624	299.37	50.8919	325	1911.72	316.91	243.749	296.69	56.4743	323.45	1870.68	313.87	230.978	296.15	50.6188
317.85	2219.7	303.04	2057.23	316.89	239.987	303.38	226.363	305.46	59.8788	320.63	1871.48	314.91	246.531	299.37	50.8639	325.01	1909.97	316.92	243.368	296.71	56.3793	323.46	1866.89	313.87	230.67	296.16	50.5643
317.85	2218.18	303.04	2058.4	316.9	240.276	303.4	226.167	305.48	59.8398	320.63	1872.49	314.92	246.15	299.38	50.84	325.01	1910.7	316.93	242.976	296.71	56.4122	323.46	1868.31	313.88	230.212	296.17	50.5426
317.86	2217.34	303.05	2056.23	316.91	239.596	303.4	226.195	305.48	59.8114	320.64	1869.48	314.92	246.28	299.39	50.8109	325.02	1908.09	316.94	242.818	296.73	56.3091	323.47	1865.9	313.88	230.213	296.18	50.5121
317.86	2216.05	303.06	2054.09	316.91	240.09	303.42	226.317	305.49	59.7743	320.64	1870.62	314.94	245.778	299.4	50.7878	325.02	1908.87	316.96	242.697	296.73	56.3435	323.48	1863.45	313.89	230.222	296.19	50.4594
317.88	2214.88	303.06	2055.02	316.92	239.419	303.41	226.242	305.5	59.7437	320.65	1867.3	314.95	245.917	299.41	50.7605	325.03	1906.95	316.97	242.278	296.75	56.2451	323.48	1864.59	313.9	230.166	296.19	50.4881
317.87	2214.53	303.07	2051.64	316.93	238.981	303.42	226.205	305.51	59.7084	320.66	1868.44	314.96	245.657	299.41	50.7377	325.04	1904.97	316.97	242.576	296.75	56.2744	323.49	1861.38	313.92	230.138	296.2	50.4322
317.89	2213.31	303.07	2052.75	316.93	239.13	303.41	226.233	305.52	59.6811	320.67	1865.24	314.97	245.573	299.42	50.7105	325.04	1906.11	316.98	242.139	296.77	56.2075	323.49	1862.35	313.92	230.035	296.21	50.4038
317.89	2211.55	303.08	2049.31	316.94	238.897	303.42	226.083	305.53	59.6516	320.67	1866.35	314.98	245.331	299.43	50.6854	325.05	1903.98	316.98	242.446	296.78	56.172	323.5	1860.01	313.94	229.886	296.22	50.3795
317.9	2210.27	303.08	2050.41	316.95	238.739	303.42	225.952	305.54	59.6232	320.68	1863.04	314.99	245.489	299.44	50.6619	325.06	1902.94	316.99	242.046	296.79	56.1322	323.51	1857.96	313.93	229.914	296.23	50.3533
317.9	2208.79	303.09	2046.89	316.96	238.515	303.43	225.803	305.55	59.5909	320.68	1864.29	315	245.21	299.45	50.6402	325.07	1900.99	317	241.897	296.8	56.1	323.51	1859.21	313.95	230.1	296.24	50.2974
317.91	2207.57	303.09	2047.93	316.97	238.608	303.44	225.625	305.56	59.5617	320.69	1860.98	315.01	244.94	299.45	50.6137	325.07	1902.04	317	241.952	296.81	56.062	323.52	1857.01	313.95	229.867	296.24	50.3268
317.91	2205.75	303.1	2043.19	316.98	238.655	303.45	225.307	305.57	59.529	320.69	1862.18	315.01	245.089	299.46	50.5989	325.08	1898.55	317.01	241.775	296.82	56.0272	323.53	1854.67	313.98	229.755	296.25	50.2672
317.93	2204.29	303.1	2044.49	316.98	238.739	303.48	225.223	305.57	59.5035	320.7	1858.82	315.02	244.819	299.47	50.5739	325.08	1899.93	317.02	241.748	296.83	55.9907	323.53	1855.64	313.97	229.652	296.26	50.2348
317.93	2202.56	303.1	2045.57	316.99	238.58	303.48	225.073	305.58	59.4714	320.7	1859.92	315.03	244.112	299.48	50.55	325.09	1896.27	317.03	241.682	296.84	55.9578	323.54	1852.5	313.99	229.549	296.27	50.2075
317.94	2201.36	303.11	2041.18	316.99	238.655	303.51	225.036	305.59	59.4445	320.71	1856.67	315.03	244.27	299.49	50.522	325.09	1897.47	317.04	241.599	296.85	55.9205	323.54	1853.51	313.98	229.437	296.28	50.1784
317.94	2200.06	303.11	2042.22	317	238.524	303.51	224.905	305.6	59.4095	320.72	1854.24	315.03	244.484	299.49	50.4859	325.1	1893.96	317.06	241.543	296.86	55.8872	323.55	1850.26	314	229.344	296.29	50.1559
317.96	2198.95	303.13	2039.19	317.01	238.524	303.52	224.774	305.61	59.3826	320.72	1857.83	315.03	244.624	299.5	50.4631	325.1	1895.17	317.08	241.571	296.87	55.8484	323.56	1848.92	314	229.241	296.3	50.1276
317.96	2197.47	303.13	2040.37	317.02	238.776	303.53	224.578	305.62	59.3498	320.73	1852.2	315.04	243.731	299.51	50.4417	325.11	1891.76	317.09	241.179	296.88	55.8159	323.56	1849.55	314.02	229.12	296.31	50.0782
317.97	2196.23	303.14	2036.87	317.03	238.767	303.52	224.4	305.63	59.3236	320.73	1855.53	315.04	243.898	299.52	50.4156	325.11	1893.08	317.09	241.468	296.89	55.7478	323.57	1848.08	314.03	228.784	296.31	50.1084
317.97	2194.99	303.14	2038.17	317.04	238.543	303.53	224.344	305.64	59.2926	320.74	1853.27	315.06	243.47	299.52	50.3942	325.12	1889.48	317.1	240.826	296.89	55.7829	323.58	1846.17	314.03	228.606	296.32	50.0517
317.99	2193.86	303.15	2034.62	317.06	238.515	303.53	224.148	305.65	59.2639	320.75	1850.21	315.07	243.312	299.53	50.3663	325.12	1890.73	317.1	240.947	296.91	55.6823	323.58	1846.9	314.04	228.429	296.33	50.0377
317.99	2192.82	303.15	2035.6	317.07	238.263	303.54	223.905	305.66	59.2311	320.75	1851.31	315.08	242.986	299.54	50.3445	325.13	1887.46	317.1	241.151	296.91	55.7116	323.59	1845.42	314.04	228.288	296.34	50.0123
318	2192.26	303.16	2032.87	317.08	238.17	303.54	223.587	305.67	59.2045	320.76	1848.19	315.08	243.144	299.55	50.321	325.13	1888.79	317.11	240.555	296.93	55.6183	323.6	1843.68	314.05	228.055	296.35	49.9821
318	2191.36	303.16	2033.8	317.09	237.583	303.55	223.559	305.68	59.1732	320.76	1849.2	315.1	242.79	299.55	50.2981	325.14	1885.28	317.11	240.704	296.93	55.6483	323.6	1844.62	314.06	227.961	296.36	49.9253
318.01	2190.78	303.17	2031.05	317.09	238.086	303.56	223.418	305.68	59.1433	320.77	1846.15	315.1	242.856	299.56	50.2709	325.14	1886.51	317.12	240.257	296.94	55.5802	323.61	1841.82	314.07	227.877	296.36	49.9559
318.01	2190.02	303.17	2032.11	317.09	238.17	303.56	223.241	305.7	59.1018	320.77	1847.31	315.11	242.669	299.57	50.2525	325.15	1884.2	317.13	240.08	296.95	55.5488	323.61	1842.84	314.07	227.859	296.37	49.9018
318.02	2189.17	303.18	2029.13	317.1	237.48	303.58	223.128	305.7	59.0745	320.78	1845.37	315.12	242.595	299.58	50.2293	325.16	1883.02	317.14	239.763	296.96	55.4822	323.62	1841.35	314.08	227.905	296.38	49.8774
318.02	2188.09	303.18	2030.08	317.11	237.322	303.58	222.96	305.72	59.0377	320.78	1845.35	315.12	242.753	299.58	50.209	325.17	1880.85	317.14	239.978	296.96	55.514	323.63	1839.54	314.08	227.84	296.39	49.824
318.03	2187.15	303.2	2026.43	317.12	237.238	303.58	222.867	305.72	59.0118	320.79	1843.12	315.13	242.66	299.6	50.1836	325.17	1882.09	317.16	239.652	296.98	55.4163	323.63	1840.34	314.09	227.672	296.39	49.8539
318.03	2186.32	303.2	2027.42	317.13	237.052	303.59	222.745	305.74	58.9728	320.79	1844.38	315.14	242.483	299.6	50.1633	325.18	1878.86	317.17	239.503	296.98	55.4463	323.64	1837.84	314.09	227.56	296.4	49.796
318.04	2185.56	303.21	2024.07	317.14	237.005	303.6	222.651	305.74	58.9451	320.8	1840.99	315.14	242.585	299.61	50.1361	325.18	1880.01	317.19	239.27	297	55.349	323.64	1838.55	314.09	227.457	296.41	49.7684
318.05	2184.5	303.21	2025.41	317.17	236.408	303.61	222.455	305.76	58.8974	320.81	1842.13	315.16	242.222	299.62	50.1166	325.19	1876.24	317.19	239.279	297	55.3801	323.65	1835.72	314.1	227.279	296.42	49.7429
318.06	2183.46	303.22	2021.8	317.17	236.539	303.61	222.399	305.76	58.8701	320.82	1838.68	315.16	242.334	299.63	50.0956	325.19	1877.42	317.19	239.288	297.01	55.3179	323.66	1833.91	314.1	226.934	296.43	49.6869
318.06	2182.53	303.22	2022.99	317.2	236.166	303.62	222.352	305.77	58.838	320.82	1839.97	315.18	241.934	299.63	50.0749	325.2	1875.09	317.2	238.971	297.02	55.2871	323.66	1834.98	314.11	226.457	296.43	49.7057
318.07	2181.38	303.23	2019.16	317.2	236.343	303.63	222.268	305.78	58.8132	320.83	1836.7	315.18	242.036	299.64	50.0458	325.21	1873.24	317.2	239.102	297.03	55.2439	323.67	1831.97	314.11	226.242	296.44	49.66
318.07	2179.84	303.23	2020.59	317.21	235.093	303.62	222.202	305.79	58.7833	320.83	1837.76	315.2	241.71	299.65	50.0222	325.22	1870.7	317.2	239.186	297.04	55.2099	323.67	1832.79	314.12	226.195	296.45	49.6364
318.08	2178.27	303.24	2016.44	317.21	235.345	303.65	222.062	305.8	58.7546	320.84	1834.66	315.2	241.841	299.66	49.9935	325.22	1872.15	317.21	238.739	297.05	55.174	323.68	1829.37	314.12	225.887	296.46	49.6066
318.08	2176.6	303.24	2017.82	317.21	235.392	303.64	221.856	305.81	58.7221	320.84	1835.72	315.22	241.217	299.66	49.9707	325.23	1868.19	317.21	238.832	297.06	55.1488	323.68	1830.85	314.13	225.466	296.47	49.5815
318.09	2175.3	303.25	2014.04	317.21	235.746	303.67	221.734	305.81	58.6999	320.85	1832.7	315.22	241.375	299.67	49.9493	325.23	1869.58	317.22	239.074	297.07	55.0814	323.69	1826.96	314.13	225.429	296.48	49.5509
318.1	2173.63	303.25	2015.32	317.22	235.047	303.67	221.641	305.83	58.6656	320.85	1833.78	315.24	240.937	299.68	49.9276	325.24	1865.28	317.23	238.888	297.07	55.1136	323.69	1828.12	314.14	225.457	296.49	49.4971
318.1	2172.35	303.26	2012.03	317.22	235.159	303.69	221.538	305.83	58.6401	320.86	1830.43	315.24	241.002	299.69	49.9018	325.24	1866.85	317.25	238.403	297.09	55.0133	323.7	1826	314.14	225.569	296.49	49.5277
318.11	2170.98	303.26	2013.22	317.22	235.373	303.69	221.454	305.84	58.6274	320.86	1831.65	315.24	241.096	299.69	49.88	325.25	1864.1	317.25	238.683	297.09	55.0444	323.71	1825.05	314.16	225.896	296.5	49.4739
318.12	2169.66	303.27	2009.74	317.22	235.541	303.7	221.379	305.85	58.5982	320.87	1828.32	315.25	240.565	299.7	49.8579	325.26	1861.17	317.27	238.17	297.11	54.9441	323.72	1822.99	314.16	225.812	296.51	49.4499
318.12	2168.01	303.27	2011.01	317.22	235.886	303.71	221.201	305.86	58.5654	320.87	1829.42	315.25	240.807	299.71	49.8329	325.26	1862.61	317.28	238.021	297.11	54.9763	323.72	1824.21	314.18	225.831	296.52	49.4289
318.13	2166.81	303.28	2007.12	317.23	234.944	303.72	221.079	305.87	58.5362	320.88	1826.77	315.26	240.276	299.72	49.8038	325.27	1858.33	317.3	237.862	297.13	54.8768	323.73	1820.83	314.18	225.905	296.53	49.3784
318.14	2164.4	303.28	2008.33	317.23	234.963	303.73	220.976	305.88	58.5042	320.88	1827.46	315.26	240.397	299.73	49.7809	325.27	1859.57	317.31	237.779	297.13	54.9086	323.73	1822	314.19	226.111	296.53	49.4012
318.15	2163.27	303.29	2004.77	317.24	234.86	303.75	220.948	305.89	58.4765	320.89	1824.96	315.27	239.689	299.74	49.7533	325.28	1856.28	317.32	237.257	297.14	54.8412	323.74	1819.07	314.2	225.634	296.54	49.3504
318.15	2161.95	303.29	2006.11	317.25	234.655	303.75	220.958	305.9	58.4411	320.89	1825.95	315.27	239.885	299.74	49.7323	325.28	1857.08	317.32	237.182	297.15	54.8116	323.74	1819.98	314.21	225.298	296.55	49.3264
318.16	2160.6	303.31	2002.67	317.26	234.468	303.77	220.836	305.9	58.4163	320.9	1822.94	315.27	240.136	299.76	49.7054	325.29	1853.9	317.33	236.986	297.16	54.7746	323.75	1816.56	314.22	225.083	296.56	49.2965
318.17	2158.76	303.31	2003.82	317.27	234.459	303.77	220.668	305.92	58.3831	320.9	1824.06	315.28	239.4	299.76	49.6847	325.29	1855.03	317.33	237.07	297.17	54.7431	323.75	1817.65	314.23	224.924	296.57	49.2722
318.17	2157.35	303.32	2000.41	317.28	234.394	303.8	220.518	305.92	58.3572	320.91	1820.94	315.28	239.484	299.77	49.66	325.3	1852.48	317.34	236.93	297.18	54.705	323.76	1815.7	314.25	224.849	296.58	49.2431
318.18	2155.68	303.32	2001.53	317.3	234.142	303.78	220.284	305.94	58.3262	320.91	1821.98	315.29	239.26	299.78	49.6283	325.31	1851.57	317.35	237.005	297.19	54.6742	323.77	1813.61	314.25	224.503	296.59	49.2191
318.19	2154.27	303.33	1998.81	317.3	234.254	303.8	220.134	305.94	58.2974	320.92	1818.84	315.29	239.326	299.79	49.5977	325.32	1849.31	317.36	236.091	297.2	54.6372	323.77	1814.6	314.27	224.326	296.6	49.1723
318.19	2152.43	303.33	1999.71	317.32	234.002	303.79	219.947	305.95	58.2628	320.92	1820.06	315.3	239.102	299.79	49.5742	325.32	1850.36	317.36	236.492	297.21	54.6065	323.78	1812.43	314.28	224.204	296.6	49.1951
318.2	2150.56	303.34	1997.64	317.33	233.927	303.81	219.722	305.96	58.2322	320.93	1818.02	315.3	239.139	299.8	49.5483	325.33	1847.22	317.36	236.697	297.22	54.5735	323.79	1810.13	314.28	224.279	296.61	49.1424
318.2	2148.86	303.35	1995.18	317.35	233.759	303.8	219.413	305.97	58.1986	320.94	1816.97	315.32	239.083	299.81	49.5251	325.33	1847.94	317.37	236.389	297.23	54.5453	323.79	1811.47	314.29	224.298	296.62	49.1158
318.21	2147.13	303.35	1996.21	317.36	233.703	303.82	219.273	305.98	58.1724	320.95	1815.23	315.32	239.139	299.82	49.4982	325.34	1846.06	317.38	235.886	297.24	54.5112	323.8	1808.91	314.29	224.064	296.63	49.059
318.22	2144.79	303.36	1993.23	317.38	233.041	303.81	219.067	305.99	58.1417	320.95	1816.19	315.34	238.971	299.82	49.4791	325.35	1844.97	317.38	236.017	297.25	54.4456	323.81	1806.05	314.31	223.867	296.63	49.0878
318.22	2143.27	303.36	1994.16	317.38	233.311	303.83	218.927	306	58.114	320.96	1813.01	315.34	239.121	299.83	49.4543	325.36	1843.07	317.41	235.214	297.25	54.4808	323.81	1807.17	314.3	223.615	296.64	49.0303
318.23	2141.08	303.37	1991.61	317.38	233.498	303.84	218.786	306.01	58.0841	320.96	1814.26	315.35	238.85	299.84	49.4341	325.36	1843.96	317.41	235.457	297.27	54.4181	323.82	1802.29	314.31	223.549	296.65	49.0063
318.23	2139.32	303.37	1992.28	317.39	232.696	303.85	218.73	306.01	58.0597	320.97	1810.67	315.36	238.701	299.85	49.4344	325.37	1840.86	317.41	235.606	297.28	54.3826	323.82	1803.71	314.31	223.802	296.66	48.9414
318.24	2137.04	303.38	1990.34	317.39	232.873	303.86	219.189	306.03	58.0308	320.97	1811.94	315.37	238.627	299.86	49.4142	325.37	1842.1	317.42	235.336	297.29	54.3507	323.82	1804.78	314.33	223.727	296.66	48.9632
318.25	2134.83	303.39	1987.77	317.4	232.537	303.87	219.142	306.03	58.005	320.98	1808.63	315.38	238.263	299.87	49.3862	325.38	1839.89	317.43	234.879	297.3	54.3188	323.83	1799.8	314.33	223.699	296.68	48.8942
318.26	2132.55	303.39	1989.24	317.41	232.397	303.87	219.039	306.05	57.9718	320.98	1809.77	315.38	238.524	299.87	49.3744	325.39	1839.18	317.43	234.991	297.31	54.2914	323.83	1801.23	314.35	223.671	296.68	48.9167
318.26	2130.3	303.4	1985.76	317.42	232.164	303.89	218.954	306.05	57.9459	320.99	1807.79	315.39	238.077	299.88	49.3478	325.39	1838.94	317.45	234.683	297.32	54.2569	323.84	1797.86	314.34	223.699	296.69	48.8661
318.27	2127.59	303.4	1987.03	317.42	232.266	303.88	218.936	306.06	57.9159	321	1806.67	315.4	237.695	299.89	49.3242	325.4	1838.3	317.46	234.776	297.33	54.2254	323.84	1798.92	314.36	223.615	296.7	48.8436
318.27	2125.42	303.41	1983.21	317.45	232.061	303.91	218.861	306.07	57.8897	321.01	1803.45	315.41	237.564	299.9	49.2969	325.41	1836.08	317.47	234.543	297.34	54.1895	323.85	1795.24	314.36	223.437	296.71	48.7938
318.28	2123.04	303.41	1984.68	317.45	232.238	303.89	218.814	306.08	57.8612	321.01	1805.68	315.42	237.611	299.9	49.2722	325.41	1837.05	317.48	234.627	297.35	54.1587	323.85	1796.51	314.38	223.287	296.71	48.8167
318.29	2121.07	303.42	1982.3	317.45	232.173	303.91	218.749	306.08	57.8338	321.02	1801.38	315.42	237.359	299.91	49.242	325.42	1833.93	317.5	234.244	297.36	54.1231	323.86	1792.92	314.37	222.52	296.72	48.7673
318.3	2118.33	303.43	1980.38	317.45	232.126	303.89	218.168	306.1	57.8006	321.02	1802.5	315.44	237.312	299.92	49.2184	325.42	1834.94	317.5	234.356	297.37	54.0916	323.86	1794.14	314.39	221.977	296.73	48.744
318.3	2116.29	303.43	1981.33	317.46	231.426	303.93	218.112	306.1	57.7733	321.03	1799.9	315.44	237.452	299.93	49.1937	325.43	1832.66	317.52	234.049	297.38	54.0663	323.87	1791.39	314.39	221.725	296.74	48.7116
318.31	2113.93	303.44	1978.48	317.46	231.744	303.92	217.953	306.11	57.747	321.03	1800.96	315.46	237.21	299.93	49.1716	325.44	1831.54	317.52	234.17	297.39	54.0374	323.87	1792.6	314.4	221.575	296.74	48.7204
318.31	2113.04	303.44	1979.37	317.46	232.07	303.94	217.878	306.11	57.7225	321.04	1797.82	315.47	237.117	299.94	49.1461	325.45	1828.45	317.53	233.554	297.4	53.9985	323.88	1790.3	314.41	221.426	296.76	48.6584
318.32	2111.05	303.45	1978.39	317.47	231.174	303.94	217.728	306.13	57.6937	321.04	1798.94	315.49	236.79	299.95	49.128	325.45	1829.61	317.53	233.47	297.41	53.9751	323.89	1788.17	314.42	221.426	296.76	48.6868
318.32	2109.47	303.46	1976.45	317.47	231.884	303.95	217.672	306.13	57.6704	321.05	1796.9	315.49	236.949	299.96	49.1059	325.45	1830.38	317.53	233.573	297.42	53.9475	323.89	1788.99	314.43	221.566	296.77	48.6333
318.34	2107.52	303.46	1977.55	317.48	230.913	303.96	217.625	306.15	57.6353	321.06	1795.76	315.51	236.744	299.97	49.0856	325.46	1826.58	317.53	233.75	297.43	53.9193	323.9	1786.52	314.43	221.716	296.78	48.6097
318.34	2106.13	303.47	1974.51	317.48	231.566	303.97	217.512	306.15	57.6083	321.07	1793.74	315.52	236.315	299.98	49.0613	325.46	1827.54	317.53	233.899	297.44	53.8863	323.9	1786.82	314.44	221.922	296.79	48.5592
318.35	2104.46	303.47	1975.55	317.49	230.875	303.97	217.288	306.16	57.5799	321.07	1794.9	315.53	236.24	299.99	49.0417	325.47	1825.72	317.54	232.863	297.45	53.8493	323.91	1784.86	314.44	222.23	296.79	48.5817
318.35	2103.1	303.48	1972.46	317.5	230.586	303.99	217.222	306.17	57.5485	321.08	1792.85	315.54	235.457	300	49.0148	325.48	1824.17	317.54	232.985	297.46	53.8328	323.91	1785.57	314.45	222.071	296.8	48.5359
318.36	2101.75	303.48	1973.65	317.5	230.661	303.98	217.185	306.18	57.5233	321.09	1791.74	315.54	235.522	300.01	48.9953	325.48	1824.75	317.54	233.2	297.47	53.8027	323.92	1782.61	314.45	221.94	296.81	48.5134
318.36	2100.89	303.49	1971.23	317.52	230.222	304	217.1	306.19	57.4981	321.1	1789.76	315.54	235.681	300.02	48.9731	325.49	1822.73	317.54	233.377	297.48	53.7657	323.92	1783.64	314.46	221.809	296.82	48.4595
318.38	2098.95	303.5	1969.84	317.52	230.446	304	216.979	306.2	57.4503	321.1	1790.88	315.54	235.821	300.03	48.9506	325.49	1823.42	317.54	233.414	297.49	53.7375	323.93	1780.25	314.46	221.622	296.82	48.4872
318.37	2097.35	303.51	1967.62	317.54	230.035	304.02	216.988	306.2	57.4266	321.11	1787.74	315.54	236.082	300.03	48.9226	325.5	1821.12	317.55	232.528	297.5	53.7048	323.93	1781.36	314.46	221.865	296.83	48.4296
318.39	2096.05	303.51	1968.76	317.56	229.829	304.02	216.819	306.22	57.3985	321.11	1788.88	315.56	235.233	300.04	48.9041	325.5	1821.87	317.55	232.668	297.51	53.6773	323.94	1778.25	314.46	221.388	296.84	48.4067
318.38	2094.47	303.52	1965.47	317.57	229.718	304.04	216.754	306.22	57.3758	321.12	1785.17	315.56	235.364	300.05	48.8813	325.51	1819.42	317.57	231.968	297.52	53.6432	323.94	1779.19	314.48	221.379	296.85	48.3802
318.4	2092.22	303.52	1966.63	317.59	229.475	304.05	216.632	306.23	57.351	321.12	1786.8	315.57	234.935	300.06	48.8602	325.51	1820.23	317.57	232.304	297.53	53.6139	323.95	1776.04	314.47	221.304	296.86	48.3573
318.4	2090.36	303.53	1963.37	317.6	229.111	304.06	216.463	306.24	57.3244	321.13	1784.14	315.58	234.916	300.07	48.8366	325.52	1818.38	317.58	231.725	297.54	53.5545	323.95	1777.13	314.49	221.182	296.87	48.3104
318.41	2088.25	303.53	1964.41	317.6	229.26	304.06	216.304	306.25	57.2981	321.14	1782.97	315.58	234.944	300.07	48.8156	325.53	1816.17	317.59	231.809	297.54	53.5827	323.96	1774.77	314.48	220.995	296.87	48.3333
318.41	2086.52	303.54	1961.24	317.62	228.961	304.07	216.154	306.25	57.2722	321.15	1780.83	315.58	235.009	300.08	48.7912	325.53	1817.25	317.6	231.632	297.55	53.5225	323.97	1772.58	314.49	220.77	296.89	48.2653
318.42	2084.7	303.54	1962.4	317.62	228.952	304.08	215.976	306.26	57.2572	321.15	1781.95	315.6	234.226	300.09	48.7728	325.54	1814.6	317.61	231.753	297.56	53.4939	323.97	1773.76	314.5	220.714	296.89	48.2856
318.42	2083.47	303.55	1959.21	317.64	228.942	304.08	215.723	306.27	57.2298	321.16	1778.87	315.6	234.338	300.1	48.7547	325.54	1815.42	317.63	231.464	297.57	53.484	323.98	1770.56	314.51	220.125	296.9	48.2184
318.44	2081.34	303.55	1960.42	317.64	228.933	304.09	215.526	306.28	57.1988	321.16	1779.92	315.6	234.487	300.11	48.7355	325.55	1813.7	317.63	231.576	297.58	53.455	323.98	1771.59	314.52	220.209	296.9	48.2424
318.43	2079.46	303.56	1956.96	317.65	228.727	304.1	215.348	306.28	57.1718	321.17	1778.21	315.6	234.748	300.11	48.7138	325.56	1812.52	317.64	231.342	297.59	53.3963	323.99	1768.55	314.52	219.966	296.92	48.1679
318.45	2077.43	303.56	1958.19	317.65	228.812	304.1	215.152	306.3	57.1403	321.18	1776.25	315.6	234.879	300.12	48.6924	325.56	1812.8	317.66	231.221	297.59	53.4224	323.99	1769.68	314.52	219.881	296.92	48.1908
318.45	2076.15	303.57	1956.18	317.66	228.681	304.1	215.255	306.3	57.1155	321.18	1777.2	315.61	234.114	300.13	48.668	325.57	1810.73	317.67	231.51	297.61	53.3417	324	1766.36	314.53	219.863	296.93	48.1446
318.46	2073.75	303.58	1954.14	317.67	228.186	304.11	215.039	306.31	57.0819	321.19	1774.26	315.62	233.918	300.14	48.6488	325.57	1811.72	317.69	231.146	297.61	53.3721	324	1767.45	314.54	219.872	296.94	48.1295
318.45	2072.21	303.58	1955.08	317.67	228.494	304.12	214.945	306.32	57.0527	321.19	1775.16	315.63	233.769	300.14	48.623	325.58	1809.17	317.69	231.426	297.63	53.2815	324.01	1764.45	314.55	219.872	296.95	48.104
318.47	2070.5	303.59	1952	317.67	228.643	304.13	214.842	306.33	57.022	321.2	1772.34	315.64	233.61	300.15	48.6016	325.58	1809.89	317.71	231.062	297.63	53.309	324.01	1765.5	314.57	219.75	296.96	48.0807
318.47	2068.9	303.59	1953.01	317.67	228.718	304.13	214.692	306.34	56.9968	321.2	1773.18	315.64	233.685	300.16	48.5761	325.59	1807.19	317.72	231.211	297.65	53.2188	324.02	1762.64	314.57	220.05	296.97	48.0593
318.48	2067.17	303.6	1949.3	317.68	227.859	304.13	214.495	306.34	56.9665	321.21	1770.39	315.66	233.526	300.17	48.5551	325.59	1808.09	317.72	231.277	297.65	53.2474	324.02	1763.61	314.59	219.891	296.98	48.0401
318.48	2066.06	303.6	1950.59	317.68	228.092	304.13	214.43	306.36	56.9373	321.21	1771.25	315.67	233.433	300.17	48.509	325.6	1806.07	317.73	230.315	297.66	53.189	324.03	1761.72	314.59	219.778	296.99	47.9913
318.49	2064.8	303.61	1947.01	317.68	228.391	304.14	214.411	306.36	56.9048	321.22	1769.49	315.67	233.47	300.18	48.4887	325.61	1805.19	317.73	230.418	297.67	53.1604	324.04	1759.98	314.61	219.657	296.99	48.0146
318.49	2063.66	303.61	1947.97	317.69	227.672	304.14	214.093	306.37	56.8781	321.23	1767.39	315.68	233.395	300.19	48.4673	325.62	1803.53	317.73	230.567	297.68	53.127	324.04	1760.62	314.61	219.582	297	47.9415
318.5	2062.03	303.62	1945.92	317.71	227.466	304.14	213.999	306.38	56.8489	321.23	1768.54	315.69	233.293	300.2	48.437	325.62	1804.11	317.73	231.109	297.69	53.0958	324.05	1758.03	314.63	219.451	297	47.9648
318.5	2060.91	303.63	1943	317.72	227.335	304.14	213.971	306.39	56.8262	321.24	1764.34	315.69	233.377	300.2	48.4182	325.63	1800.2	317.73	231.183	297.7	53.0389	324.05	1759.02	314.62	219.039	297.02	47.8961
318.51	2059.61	303.63	1944.3	317.74	227.102	304.15	213.933	306.4	56.8014	321.24	1765.28	315.7	233.032	300.21	48.3997	325.63	1801.12	317.74	229.69	297.7	53.0657	324.06	1755.93	314.64	218.627	297.02	47.9178
318.51	2058.68	303.64	1940.85	317.74	227.186	304.15	213.83	306.41	56.7754	321.24	1766.46	315.7	233.153	300.22	48.3761	325.64	1798.25	317.74	230.194	297.72	52.9802	324.06	1756.83	314.65	218.187	297.03	47.8687
318.53	2057.92	303.64	1941.95	317.76	226.868	304.16	213.783	306.42	56.7451	321.25	1762.56	315.71	232.882	300.23	48.3576	325.64	1799.15	317.76	229.335	297.72	53.0074	324.07	1754.4	314.66	218.177	297.04	47.8429
318.52	2056.84	303.65	1938.15	317.76	226.934	304.19	213.718	306.43	56.7195	321.25	1763.35	315.72	232.752	300.24	48.3377	325.65	1796.16	317.76	229.512	297.74	52.9196	324.07	1755.09	314.66	218.046	297.05	47.7952
318.54	2055.57	303.65	1939.7	317.78	227.102	304.19	213.586	306.43	56.6932	321.26	1761.61	315.73	232.696	300.25	48.3185	325.65	1797.19	317.78	229.232	297.74	52.949	324.08	1753.31	314.67	218.215	297.05	47.8181
318.54	2054.68	303.66	1935.73	317.78	226.784	304.22	213.427	306.44	56.6702	321.27	1760.28	315.74	232.397	300.25	48.2949	325.66	1794.14	317.79	229.148	297.76	52.8462	324.09	1750.64	314.67	218	297.07	47.728
318.55	2053.98	303.66	1937.03	317.79	226.765	304.21	213.333	306.45	56.6435	321.28	1758.41	315.74	232.574	300.26	48.2753	325.66	1795	317.8	229.045	297.76	52.8763	324.09	1751.76	314.68	217.896	297.07	47.7642
318.55	2052.84	303.67	1932.3	317.79	226.98	304.24	213.211	306.46	56.6172	321.28	1759.21	315.75	231.856	300.27	48.251	325.68	1791.87	317.81	228.877	297.78	52.7786	324.1	1749.64	314.69	218.084	297.08	47.7025
318.56	2051.47	303.67	1934.66	317.79	226.99	304.24	213.042	306.47	56.5825	321.29	1756.87	315.75	232.052	300.28	48.2277	325.68	1792.92	317.83	228.615	297.78	52.8135	324.11	1747.86	314.7	218.299	297.09	47.6785
318.56	2050.46	303.68	1930.82	317.8	226.204	304.27	212.921	306.47	56.5533	321.29	1757.6	315.75	232.238	300.29	48.203	325.69	1789.66	317.83	228.746	297.79	52.7405	324.11	1748.72	314.69	218.102	297.1	47.6253
318.57	2049.2	303.68	1932	317.8	226.392	304.26	212.714	306.49	56.5251	321.3	1754.89	315.76	231.529	300.3	48.183	325.69	1790.66	317.84	228.615	297.8	52.7126	324.12	1746.83	314.7	217.924	297.1	47.6486
318.57	2048.21	303.69	1929.98	317.8	226.541	304.27	212.611	306.49	56.4999	321.3	1755.88	315.76	231.772	300.3	48.162	325.7	1787.48	317.85	228.503	297.81	52.678	324.13	1744.7	314.7	217.578	297.11	47.5998
318.58	2046.76	303.7	1927.95	317.81	225.719	304.27	212.574	306.5	56.4663	321.31	1752.58	315.76	231.94	300.31	48.142	325.7	1788.45	317.86	228.279	297.81	52.7045	324.13	1745.58	314.71	216.894	297.12	47.5765
318.58	2045.46	303.7	1928.94	317.81	225.765	304.28	212.527	306.51	56.444	321.31	1753.65	315.77	231.351	300.32	48.1169	325.71	1785.75	317.86	228.391	297.83	52.5984	324.14	1743.01	314.71	216.922	297.13	47.5503
318.6	2043.88	303.71	1926.12	317.81	226.214	304.28	212.508	306.52	56.4159	321.32	1751.53	315.78	231.202	300.32	48.0944	325.71	1786.33	317.87	228.073	297.83	52.6263	324.14	1743.84	314.71	216.941	297.14	47.5288
318.6	2041.96	303.71	1926.87	317.83	225.569	304.29	212.339	306.53	56.3881	321.33	1749.79	315.79	231.025	300.33	48.0693	325.72	1783.23	317.88	227.896	297.84	52.566	324.15	1742.34	314.74	216.847	297.15	47.4823
318.61	2040.64	303.72	1925.19	317.84	225.522	304.29	212.189	306.54	56.3574	321.33	1750.77	315.79	231.118	300.34	48.0512	325.72	1784.33	317.88	227.989	297.85	52.5374	324.16	1740.95	314.74	216.838	297.15	47.5048
318.61	2039.42	303.72	1926.05	317.86	225.522	304.3	212.124	306.54	56.3296	321.34	1747.98	315.81	230.931	300.35	48.0298	325.73	1781.88	317.88	228.214	297.86	52.5025	324.16	1741.57	314.76	216.726	297.16	47.4583
318.62	2037.58	303.73	1923.21	317.86	225.485	304.31	212.058	306.55	56.2945	321.34	1748.97	315.83	230.819	300.35	48.0113	325.74	1780.91	317.89	227.578	297.87	52.4775	324.17	1739.38	314.76	216.688	297.17	47.4353
318.62	2036.53	303.73	1924.07	317.88	225.204	304.32	211.927	306.56	56.266	321.35	1746.18	315.84	230.745	300.36	47.9899	325.75	1779	317.89	227.7	297.88	52.4467	324.17	1740.13	314.79	216.819	297.18	47.3892
318.63	2035.38	303.74	1921.54	317.88	225.466	304.33	211.739	306.57	56.2342	321.35	1747.1	315.86	230.642	300.36	47.971	325.75	1779.93	317.9	227.317	297.89	52.4184	324.18	1737.52	314.79	217.11	297.18	47.411
318.63	2034.6	303.74	1922.36	317.9	224.793	304.34	211.608	306.58	56.2071	321.36	1745.47	315.87	230.549	300.38	47.9485	325.76	1776.98	317.9	227.485	297.9	52.3567	324.18	1738.4	314.79	216.913	297.19	47.3625
318.64	2033.8	303.75	1919.32	317.9	225.045	304.35	211.373	306.59	56.1706	321.36	1745.41	315.88	230.409	300.38	47.9286	325.76	1777.86	317.91	227.167	297.9	52.3853	324.19	1735.54	314.8	216.669	297.2	47.343
318.64	2033.17	303.75	1920.36	317.91	224.503	304.37	211.308	306.6	56.1435	321.37	1743.74	315.89	230.334	300.39	47.9034	325.77	1775.93	317.92	227.083	297.92	52.2935	324.19	1736.4	314.79	216.267	297.21	47.2982
318.66	2032.13	303.76	1916.98	317.91	224.69	304.37	211.204	306.61	56.0982	321.38	1741.68	315.9	229.4	300.4	47.8817	325.78	1773.89	317.93	226.812	297.92	52.3221	324.2	1733.72	314.8	216.004	297.21	47.3204
318.66	2030.75	303.76	1918.12	317.92	224.438	304.38	211.176	306.61	56.0719	321.38	1742.83	315.9	229.811	300.41	47.8536	325.78	1774.95	317.93	226.98	297.94	52.227	324.2	1734.43	314.79	215.808	297.22	47.2731
318.67	2029.84	303.77	1914.97	317.93	224.073	304.38	211.157	306.63	56.0437	321.38	1744.7	315.9	230.044	300.41	47.8336	325.79	1772.88	317.94	226.821	297.94	52.2575	324.21	1732.65	314.81	215.742	297.23	47.2528
318.67	2029.28	303.77	1915.92	317.93	224.157	304.39	211.101	306.63	56.0185	321.39	1739.68	315.9	230.213	300.43	47.8059	325.8	1770.2	317.94	226.663	297.96	52.1668	324.22	1730.68	314.81	215.601	297.24	47.2114
318.68	2028.42	303.78	1913.01	317.96	224.026	304.39	211.036	306.64	55.9907	321.39	1740.58	315.91	229.606	300.43	47.7864	325.8	1771.57	317.95	226.541	297.96	52.1954	324.22	1731.72	314.83	215.452	297.24	47.2295
318.68	2027.49	303.78	1913.98	317.96	224.045	304.4	210.998	306.65	55.9684	321.4	1739.02	315.92	229.232	300.44	47.7638	325.81	1768.27	317.95	226.644	297.98	52.1054	324.23	1729.92	314.83	215.302	297.25	47.1877
318.7	2026.64	303.79	1912.02	317.97	224.008	304.41	210.895	306.66	55.9651	321.41	1738.18	315.92	229.316	300.45	47.7502	325.81	1769.17	317.96	226.943	297.98	52.1293	324.24	1727.91	314.85	215.273	297.26	47.1593
318.7	2026.04	303.8	1910.19	317.98	223.923	304.41	210.886	306.66	55.9435	321.42	1736.33	315.93	229.148	300.46	47.7269	325.82	1766.19	317.96	226.55	298	52.0448	324.24	1728.83	314.85	215.386	297.27	47.1326
318.71	2025.39	303.8	1911.41	317.99	223.68	304.41	210.782	306.68	55.919	321.42	1737.37	315.94	228.998	300.46	47.7062	325.82	1767.08	317.97	226.85	298	52.0745	324.25	1726.24	314.86	215.358	297.28	47.0838
318.71	2025.76	303.81	1909.49	317.99	223.858	304.41	210.679	306.68	55.8967	321.43	1734.53	315.96	229.008	300.48	47.6859	325.83	1764.15	317.99	226.709	298.01	52.0124	324.25	1726.9	314.88	215.273	297.28	47.1108
318.72	2025.32	303.81	1909.21	318	223.409	304.42	210.52	306.7	55.8726	321.43	1735.44	315.97	228.924	300.48	47.667	325.83	1765.11	318	226.662	298.02	51.9834	324.26	1724.48	314.88	215.048	297.29	47.0635
318.72	2024.78	303.82	1908.53	318.01	223.091	304.43	210.416	306.7	55.851	321.44	1732.82	315.98	228.905	300.49	47.6449	325.84	1762.9	318.02	226.186	298.03	51.9643	324.26	1725.33	314.89	214.758	297.3	47.0454
318.73	2023.98	303.83	1906.59	318.01	223.54	304.42	210.238	306.72	55.8232	321.44	1733.93	316	228.737	300.49	47.6253	325.84	1763.97	318.03	226.139	298.04	51.9386	324.27	1722.78	314.9	214.692	297.31	47.0236
318.73	2023.36	303.83	1907.51	318.02	223.222	304.44	210.116	306.72	55.8068	321.45	1731.25	316	228.784	300.51	47.599	325.85	1759.34	318.04	225.737	298.05	51.8853	324.27	1723.62	314.91	214.627	297.32	46.9969
318.74	2022.75	303.84	1905.38	318.03	222.792	304.44	209.985	306.73	55.7771	321.45	1732.09	316.01	227.999	300.51	47.5813	325.85	1760.52	318.04	225.943	298.05	51.9055	324.28	1721.82	314.93	214.505	297.33	46.9507
318.74	2022.53	303.84	1906.13	318.03	222.885	304.45	209.741	306.73	55.7497	321.46	1729.45	316.01	228.363	300.52	47.5532	325.85	1761.78	318.06	224.737	298.07	51.8213	324.29	1720	314.93	214.346	297.33	46.9759
318.75	2021.89	303.85	1903.49	318.04	222.577	304.47	209.469	306.75	55.7168	321.46	1730.37	316.01	228.531	300.52	47.5311	325.87	1757.17	318.06	224.765	298.07	51.8507	324.29	1721	314.95	214.252	297.34	46.9274
318.75	2021.06	303.85	1904.39	318.04	222.623	304.48	209.347	306.75	55.6926	321.47	1727.56	316.02	228.167	300.53	47.51	325.87	1758.35	318.06	225.055	298.09	51.7585	324.3	1718.09	314.95	213.896	297.35	46.906
318.76	2019.29	303.86	1902.36	318.04	222.67	304.5	209.197	306.77	55.6645	321.47	1728.66	316.03	227.821	300.54	47.4908	325.88	1755.02	318.07	224.559	298.09	51.7875	324.3	1719.16	314.96	213.492	297.36	46.8657
318.76	2018.54	303.86	1903.12	318.05	222.53	304.5	209.075	306.77	55.6418	321.48	1725.51	316.03	227.933	300.55	47.4668	325.88	1756.22	318.07	224.615	298.11	51.7007	324.31	1717.23	314.96	213.727	297.36	46.889
318.78	2017.72	303.87	1900.68	318.05	222.539	304.52	208.877	306.79	55.6154	321.48	1726.62	316.04	227.578	300.55	47.4464	325.89	1753.03	318.07	224.821	298.11	51.7257	324.32	1716.01	314.97	213.52	297.37	46.845
318.78	2017.22	303.87	1901.39	318.07	222.343	304.53	208.84	306.79	55.5909	321.49	1723.62	316.05	227.513	300.56	47.425	325.89	1754.06	318.07	224.924	298.12	51.6698	324.32	1716.31	314.96	213.361	297.38	46.8261
318.79	2015.75	303.88	1899.71	318.07	222.502	304.54	208.859	306.8	55.562	321.49	1724.61	316.05	227.55	300.57	47.4043	325.9	1751.72	318.08	224.326	298.13	51.6434	324.33	1714.46	314.96	213.267	297.39	46.8061
318.79	2014.51	303.89	1898.08	318.08	222.193	304.54	208.765	306.81	55.5386	321.5	1721.93	316.05	227.709	300.58	47.3799	325.9	1752.02	318.08	224.382	298.14	51.6136	324.33	1715.15	314.96	213.042	297.4	46.7825
318.8	2013.5	303.89	1898.9	318.08	222.464	304.55	208.671	306.82	55.5177	321.5	1722.91	316.07	227.392	300.58	47.36	325.91	1749.94	318.08	224.419	298.15	51.5849	324.34	1712.56	314.96	212.93	297.41	46.7399
318.81	2012.46	303.9	1895.47	318.09	222.137	304.56	208.549	306.82	55.4947	321.51	1719.91	316.07	227.476	300.59	47.3389	325.91	1750.97	318.08	224.494	298.16	51.5224	324.34	1713.46	314.95	213.024	297.41	46.764
318.82	2011.51	303.9	1896.52	318.11	222.09	304.57	208.455	306.83	55.4713	321.51	1720.96	316.08	227.018	300.59	47.3201	325.92	1747.83	318.1	223.895	298.16	51.5514	324.35	1710.58	314.95	213.343	297.42	46.7199
318.82	2010.56	303.91	1892.63	318.12	221.753	304.57	208.389	306.84	55.4479	321.52	1718.62	316.08	227.167	300.61	47.2964	325.92	1748.97	318.1	224.054	298.18	51.4378	324.35	1711.49	314.95	213.042	297.43	46.6974
318.83	2009.41	303.91	1893.4	318.12	221.978	304.57	208.389	306.85	55.4233	321.52	1719.23	316.09	226.896	300.61	47.2753	325.93	1746.89	318.12	223.83	298.18	51.4661	324.36	1707.48	314.96	212.996	297.44	46.646
318.84	2008.57	303.91	1894.46	318.13	221.632	304.58	208.324	306.86	55.3984	321.53	1717.92	316.1	226.803	300.62	47.252	325.94	1745.84	318.13	223.727	298.2	51.3812	324.36	1708.51	314.97	212.686	297.44	46.6774
318.84	2007.28	303.92	1890.62	318.14	221.388	304.57	208.277	306.87	55.3666	321.53	1717.9	316.11	226.653	300.62	47.235	325.94	1746.93	318.15	223.484	298.2	51.4091	324.36	1709.38	314.98	212.546	297.45	46.6215
318.85	2006.65	303.92	1891.57	318.16	221.239	304.59	208.211	306.87	55.3435	321.54	1717.12	316.12	226.298	300.64	47.2158	325.95	1744.34	318.15	223.577	298.21	51.3529	324.37	1706.62	314.98	212.489	297.46	46.5964
318.85	2005.03	303.93	1888.79	318.16	221.276	304.59	208.145	306.89	55.319	321.55	1715.13	316.12	226.532	300.64	47.1973	325.95	1745.13	318.17	223.344	298.22	51.3271	324.38	1703.68	314.99	212.395	297.47	46.555
318.86	2004.19	303.94	1886.85	318.17	220.808	304.59	208.061	306.89	55.2978	321.55	1715.99	316.13	226.139	300.65	47.1722	325.96	1742.99	318.18	222.969	298.23	51.2649	324.38	1704.67	315.02	212.142	297.47	46.5772
318.87	2002.96	303.94	1887.89	318.18	221.079	304.6	207.882	306.9	55.2729	321.56	1713.22	316.13	226.223	300.66	47.1519	325.96	1743.59	318.18	223.091	298.23	51.2977	324.38	1705.5	315.02	211.974	297.48	46.5342
318.87	2002.05	303.95	1885.93	318.19	220.583	304.6	207.704	306.91	55.2553	321.56	1714.06	316.14	225.915	300.67	47.13	325.97	1741.66	318.18	223.166	298.25	51.209	324.39	1703.25	315.05	211.814	297.49	46.5095
318.88	2001.94	303.96	1883.95	318.19	220.668	304.62	207.554	306.92	55.2275	321.57	1711.46	316.14	226.102	300.67	47.1112	325.97	1742.15	318.2	222.689	298.25	51.2344	324.4	1701.63	315.05	211.795	297.5	46.4921
318.88	2000.69	303.96	1884.76	318.2	220.649	304.62	207.366	306.92	55.2063	321.57	1712.3	316.15	225.541	300.68	47.0927	325.98	1741.03	318.2	222.792	298.26	51.1781	324.4	1702.31	315.08	211.842	297.51	46.4455
318.89	1999.07	303.97	1882.44	318.21	220.546	304.63	207.103	306.94	55.1799	321.58	1708.49	316.15	225.784	300.69	47.0772	325.99	1739.27	318.21	222.642	298.27	51.1524	324.41	1700.1	315.07	211.833	297.51	46.4684
318.9	1998.64	303.97	1883.15	318.21	220.733	304.63	207.047	306.94	55.1554	321.58	1709.34	316.16	225.41	300.7	47.0572	325.99	1740.26	318.22	222.474	298.28	51.1263	324.41	1700.79	315.1	211.88	297.52	46.4192
318.9	1996.97	303.98	1880.69	318.22	220.274	304.65	206.981	306.95	55.1283	321.59	1706.75	316.17	225.345	300.7	47.0373	326	1737.79	318.23	222.24	298.29	51.1013	324.42	1698.43	315.1	211.861	297.53	46.3999
318.91	1996.02	303.98	1881.47	318.24	220.097	304.66	206.981	306.96	55.1052	321.59	1707.5	316.18	225.466	300.71	47.0117	326	1738.57	318.24	222.324	298.3	51.0273	324.42	1699.31	315.1	211.889	297.54	46.3755
318.91	1994.27	303.99	1878.76	318.24	220.181	304.67	206.906	306.97	55.0756	321.6	1705.8	316.2	225.055	300.71	46.9944	326.01	1736.59	318.26	221.987	298.3	51.052	324.43	1698.02	315.1	211.814	297.55	46.327
318.92	1993	303.99	1879.68	318.25	220.078	304.68	206.906	306.97	55.0521	321.61	1703.85	316.2	225.176	300.73	46.9777	326.01	1737.24	318.26	222.109	298.32	50.9706	324.43	1698.52	315.1	211.73	297.55	46.3518
318.92	1991.14	304	1876.67	318.26	219.572	304.7	206.765	306.98	55.0269	321.61	1704.97	316.22	224.868	300.73	46.9596	326.02	1735.76	318.28	221.837	298.32	50.9975	324.44	1696.38	315.11	211.748	297.57	46.28
318.93	1990.62	304	1877.57	318.26	219.919	304.7	206.69	306.99	55.0023	321.62	1701.67	316.23	224.999	300.74	46.937	326.03	1733.72	318.28	221.968	298.33	50.9375	324.44	1697.17	315.11	211.692	297.57	46.3063
318.93	1988.79	304.01	1874.38	318.27	219.554	304.7	206.549	307	54.9526	321.62	1702.81	316.24	224.615	300.75	46.913	326.03	1734.6	318.29	221.753	298.34	50.9107	324.45	1694.94	315.12	211.617	297.58	46.2601
318.94	1987.56	304.01	1875.64	318.28	219.488	304.71	206.568	307.01	54.8642	321.63	1699.72	316.25	224.709	300.76	46.8919	326.04	1731.68	318.3	221.641	298.35	50.8798	324.45	1695.52	315.12	211.401	297.59	46.2401
318.95	1985.87	304.02	1870.29	318.29	219.441	304.71	206.446	307.02	54.8591	321.63	1700.7	316.26	224.213	300.76	46.8731	326.04	1732.5	318.31	221.229	298.36	50.8536	324.46	1694.11	315.12	211.261	297.6	46.2005
318.96	1983.76	304.02	1872.62	318.3	219.32	304.71	206.343	307.02	54.8507	321.64	1697.87	316.26	224.344	300.77	46.8479	326.05	1730.09	318.31	221.463	298.37	50.7977	324.47	1693.55	315.13	211.026	297.6	46.2234
318.96	1981.57	304.02	1873.38	318.3	219.385	304.71	206.371	307.03	54.8339	321.64	1698.91	316.27	223.774	300.77	46.8287	326.05	1730.78	318.31	221.594	298.37	50.8235	324.47	1693.12	315.13	210.96	297.61	46.1757
318.97	1979.72	304.03	1868.55	318.31	219.114	304.71	206.268	307.04	54.8287	321.65	1696.83	316.27	223.895	300.79	46.8058	326.06	1728.08	318.32	221.379	298.38	50.7546	324.48	1691.75	315.14	210.839	297.62	46.122
318.97	1978.08	304.03	1869.58	318.31	219.161	304.71	206.192	307.05	54.8196	321.66	1695.86	316.27	224.064	300.79	46.7858	326.07	1726.6	318.33	220.845	298.39	50.7267	324.48	1692.76	315.14	210.773	297.62	46.1442
318.98	1976.5	304.04	1866.12	318.32	218.805	304.71	206.117	307.06	54.8053	321.67	1693.91	316.28	223.718	300.81	46.7632	326.07	1727.42	318.33	221.051	298.4	50.6983	324.49	1689.2	315.15	210.67	297.63	46.1002
318.98	1974.58	304.04	1866.89	318.32	218.87	304.74	206.108	307.06	54.7947	321.67	1694.94	316.29	223.325	300.81	46.7425	326.08	1726	318.34	220.462	298.41	50.6659	324.49	1689.99	315.15	210.576	297.64	46.082
318.99	1972.81	304.04	1867.69	318.32	218.992	304.73	205.958	307.07	54.7877	321.68	1692.69	316.29	223.605	300.83	46.7199	326.09	1724.9	318.34	220.649	298.42	50.6372	324.49	1690.93	315.16	210.388	297.65	46.0398
318.99	1971.02	304.05	1864.37	318.33	218.777	304.77	205.958	307.08	54.7797	321.68	1693.55	316.29	223.671	300.82	46.7011	326.09	1725.27	318.35	220.377	298.43	50.6126	324.5	1687.91	315.18	210.201	297.65	46.0587
319	1970.06	304.05	1865.22	318.34	218.692	304.75	205.826	307.09	54.7749	321.69	1691.9	316.29	223.746	300.84	46.6774	326.1	1723.36	318.36	220.237	298.44	50.5838	324.5	1688.51	315.18	210.107	297.66	46.0165
319.01	1969.2	304.06	1861.71	318.36	218.533	304.78	205.563	307.1	54.7643	321.7	1690.25	316.3	223.39	300.84	46.6571	326.1	1724.11	318.36	220.312	298.45	50.529	324.51	1686.82	315.2	209.957	297.67	45.995
319.01	1968.51	304.06	1862.68	318.36	218.58	304.76	205.451	307.1	54.7566	321.7	1690.96	316.3	223.512	300.86	46.6334	326.11	1721.86	318.36	220.377	298.45	50.5592	324.51	1687.66	315.2	209.609	297.68	45.9488
319.02	1967.02	304.07	1859.62	318.37	218.243	304.8	205.31	307.11	54.7449	321.71	1689.29	316.31	223.016	300.86	46.6153	326.11	1722.52	318.37	220.246	298.46	50.5021	324.52	1685.88	315.22	209.272	297.68	45.9706
319.02	1965.64	304.07	1860.65	318.37	218.327	304.79	205.404	307.12	54.7376	321.72	1687.62	316.32	223.185	300.87	46.592	326.12	1720.36	318.38	220.059	298.47	50.4763	324.53	1683.61	315.22	209.14	297.69	45.9232
319.03	1964.77	304.08	1858.52	318.39	217.784	304.81	205.15	307.13	54.7244	321.72	1688.54	316.33	222.745	300.87	46.5716	326.12	1720.98	318.39	220.134	298.48	50.4517	324.53	1684.61	315.23	209.065	297.7	45.9029
319.03	1963.67	304.09	1856.45	318.39	218.159	304.82	204.981	307.14	54.7174	321.73	1685.88	316.33	222.885	300.88	46.5487	326.13	1718.07	318.4	219.928	298.49	50.3957	324.54	1681.72	315.24	209.075	297.71	45.8562
319.04	1962.38	304.09	1857.57	318.4	217.597	304.83	204.727	307.14	54.7017	321.73	1687.01	316.35	222.483	300.89	46.5309	326.13	1718.8	318.41	219.572	298.49	50.4196	324.54	1682.79	315.25	209.112	297.71	45.8784
319.04	1961.79	304.1	1854.58	318.4	217.466	304.85	204.577	307.15	54.6954	321.74	1684.14	316.35	222.539	300.9	46.5065	326.14	1717.1	318.41	220.069	298.5	50.3718	324.55	1680.91	315.27	209.168	297.72	45.834
319.05	1960.63	304.1	1855.55	318.4	217.644	304.86	204.474	307.16	54.6834	321.74	1685.04	316.37	222.221	300.9	46.4869	326.14	1717.49	318.42	219.685	298.51	50.3489	324.56	1678.85	315.27	209.159	297.73	45.8162
319.05	1959.87	304.11	1852.6	318.4	218.056	304.88	204.333	307.17	54.6782	321.75	1683.25	316.37	222.202	300.91	46.4654	326.15	1715.92	318.43	219.404	298.52	50.3217	324.56	1679.8	315.29	209.262	297.74	45.7925
319.06	1958.6	304.11	1853.77	318.41	217.11	304.88	204.145	307.18	54.6673	321.76	1681.21	316.37	222.305	300.92	46.448	326.15	1716.5	318.44	219.076	298.53	50.2959	324.57	1676.93	315.28	209.262	297.75	45.7721
319.07	1957.89	304.12	1850.51	318.41	217.662	304.89	203.825	307.19	54.6599	321.76	1682.02	316.37	222.38	300.93	46.4399	326.16	1714.29	318.44	219.245	298.54	50.2392	324.57	1677.78	315.29	209.178	297.76	45.7518
319.07	1957.13	304.12	1851.57	318.42	217.007	304.9	203.75	307.19	54.6589	321.77	1678.43	316.38	221.875	300.93	46.4192	326.17	1712.79	318.45	218.786	298.54	50.265	324.58	1675.94	315.29	209.075	297.77	45.7118
319.08	1956.25	304.13	1848.56	318.42	217.428	304.9	203.637	307.2	54.6544	321.77	1679.32	316.38	222.025	300.94	46.3944	326.17	1713.56	318.46	218.655	298.55	50.2075	324.59	1674.25	315.3	208.821	297.77	45.7344
319.09	1955.75	304.13	1849.7	318.44	216.969	304.91	203.496	307.21	54.6439	321.78	1676.6	316.38	222.127	300.95	46.3766	326.18	1711.48	318.46	218.973	298.56	50.184	324.59	1675.19	315.29	208.774	297.78	45.6895
319.09	1955.34	304.14	1846.62	318.45	216.885	304.92	203.384	307.22	54.6379	321.78	1677.46	316.4	221.753	300.96	46.3581	326.18	1712.21	318.47	218.721	298.57	50.1571	324.6	1672.43	315.31	208.68	297.79	45.6625
319.1	1954.61	304.14	1847.63	318.45	216.894	304.92	203.214	307.23	54.6296	321.79	1674.89	316.41	221.734	300.96	46.34	326.19	1710.88	318.48	218.477	298.58	50.1335	324.6	1673.35	315.29	208.643	297.8	45.617
319.1	1953.96	304.15	1844.6	318.47	216.36	304.92	203.177	307.24	54.62	321.79	1675.64	316.41	221.585	300.97	46.3163	326.2	1709.04	318.48	218.543	298.59	50.1051	324.61	1671.17	315.31	208.502	297.8	45.6407
319.11	1952.08	304.15	1845.82	318.47	216.492	304.92	203.6	307.25	54.6087	321.8	1673.78	316.44	221.267	300.98	46.2978	326.2	1709.96	318.49	218.515	298.6	50.0801	324.62	1669.6	315.3	208.465	297.81	45.5921
319.11	1951.7	304.16	1842.36	318.49	216.314	304.92	203.553	307.26	54.6028	321.81	1671.96	316.44	221.51	300.99	46.2719	326.21	1707.91	318.5	218.477	298.61	50.0303	324.62	1670.23	315.32	208.389	297.82	45.5707
319.12	1951.09	304.16	1843.57	318.5	216.004	304.93	203.506	307.26	54.5959	321.81	1672.88	316.46	220.976	301	46.2504	326.22	1705.91	318.5	218.421	298.61	50.0543	324.63	1668.81	315.31	208.343	297.83	45.5651
319.12	1949.56	304.17	1840.19	318.5	216.267	304.93	203.431	307.28	54.5929	321.82	1670.23	316.47	220.883	301	46.2419	326.22	1706.98	318.51	218.206	298.62	50.0075	324.64	1666.84	315.33	208.314	297.84	45.5221
319.13	1949.02	304.17	1841.24	318.52	215.826	304.93	203.337	307.28	54.5863	321.82	1671.21	316.48	220.714	301.01	46.2234	326.23	1703.77	318.51	218.337	298.63	49.9817	324.64	1668.02	315.33	208.174	297.84	45.5414
319.13	1948.42	304.18	1837.97	318.52	216.145	304.93	203.337	307.29	54.5826	321.83	1668.43	316.48	220.817	301.02	46.2038	326.23	1704.93	318.52	217.728	298.64	49.9548	324.65	1663.76	315.35	207.967	297.85	45.4984
319.14	1948.33	304.18	1839.22	318.53	215.948	304.94	203.374	307.3	54.5724	321.83	1669.39	316.5	220.705	301.03	46.1835	326.24	1701.75	318.52	217.887	298.65	49.9327	324.65	1665.82	315.35	207.826	297.86	45.4825
319.14	1948.42	304.19	1835.91	318.54	215.761	304.94	203.355	307.31	54.5698	321.84	1666.65	316.51	220.34	301.03	46.1579	326.24	1702.87	318.52	218	298.66	49.8874	324.66	1662.78	315.36	207.789	297.87	45.4607
319.16	1948.5	304.19	1836.96	318.55	215.517	304.95	202.951	307.31	54.5783	321.84	1667.64	316.51	220.387	301.04	46.1398	326.25	1701.05	318.54	217.597	298.66	49.9051	324.67	1661.26	315.36	207.648	297.88	45.4258
319.16	1947.55	304.2	1834.45	318.55	215.63	304.96	202.848	307.32	54.5716	321.85	1665.86	316.52	220.181	301.05	46.1194	326.26	1699.05	318.55	217.222	298.67	49.8568	324.67	1661.94	315.37	207.47	297.88	45.451
319.17	1947.18	304.2	1835.67	318.55	215.751	304.97	202.669	307.33	54.5607	321.86	1664.29	316.52	220.321	301.06	46.0991	326.26	1699.66	318.55	217.494	298.68	49.8299	324.68	1659.48	315.38	207.3	297.89	45.4073
319.17	1946.65	304.21	1832.32	318.57	215.348	304.97	202.575	307.34	54.6197	321.86	1665	316.53	219.938	301.06	46.0769	326.26	1700.34	318.57	217.091	298.69	49.803	324.68	1660.29	315.38	207.179	297.9	45.3836
319.18	1945.83	304.21	1833.5	318.58	215.911	304.98	202.82	307.35	54.5838	321.87	1663.2	316.53	220.275	301.07	46.0587	326.27	1697.53	318.58	216.988	298.7	49.7809	324.69	1657.87	315.38	207.113	297.91	45.3595
319.18	1945.22	304.22	1830.34	318.59	215.095	304.98	202.641	307.35	54.5618	321.87	1663.97	316.54	219.357	301.08	46.0398	326.27	1698.31	318.6	216.857	298.71	49.7286	324.69	1658.56	315.39	207.085	297.92	45.3325
319.19	1944.86	304.22	1831.31	318.59	215.433	304.99	202.369	307.36	54.5361	321.88	1661.64	316.54	219.498	301.09	46.0198	326.28	1696.16	318.6	216.932	298.71	49.7533	324.7	1654.75	315.39	207.038	297.93	45.3021
319.19	1944.83	304.23	1828.41	318.59	215.676	304.99	202.162	307.37	54.5142	321.88	1662.37	316.54	219.675	301.09	45.998	326.28	1696.85	318.61	216.548	298.73	49.6766	324.7	1655.48	315.4	206.709	297.93	45.3232
319.2	1944.19	304.23	1829.42	318.6	215.245	305.01	201.814	307.38	54.4882	321.89	1660.1	316.54	220.041	301.1	45.9799	326.29	1694.36	318.61	216.669	298.73	49.6998	324.71	1652.89	315.41	206.296	297.94	45.2854
319.2	1943.89	304.24	1825.69	318.61	214.992	305.01	201.692	307.39	54.4676	321.89	1660.83	316.55	219.123	301.1	45.9625	326.29	1695.43	318.62	216.22	298.74	49.6438	324.71	1653.79	315.43	206.155	297.95	45.2636
319.21	1943.41	304.24	1827.5	318.61	214.983	305.02	201.617	307.4	54.4424	321.9	1657.44	316.55	219.245	301.11	45.9447	326.3	1692.11	318.62	216.304	298.75	49.6195	324.72	1651.82	315.43	206.145	297.96	45.2239
319.22	1943.02	304.25	1823.52	318.62	214.027	305.03	201.504	307.4	54.4204	321.9	1657.89	316.57	218.88	301.11	45.9232	326.3	1693.35	318.62	216.332	298.76	49.5675	324.72	1652.01	315.45	206.052	297.96	45.2443
319.22	1942.33	304.25	1824.69	318.62	214.093	305.05	201.005	307.41	54.3914	321.9	1659.14	316.57	219.011	301.13	45.9054	326.31	1689.95	318.62	216.388	298.76	49.593	324.73	1649.72	315.45	205.976	297.97	45.2028
319.23	1941.53	304.26	1822.6	318.62	214.936	305.06	200.968	307.42	54.3672	321.91	1655.99	316.58	218.739	301.13	45.8851	326.31	1691.02	318.62	216.398	298.78	49.5185	324.73	1650.66	315.46	205.864	297.98	45.1613
319.24	1940.22	304.27	1821.03	318.63	214.13	305.08	200.921	307.43	54.3577	321.91	1656.99	316.6	218.636	301.15	45.8673	326.32	1689.05	318.63	216.136	298.78	49.541	324.74	1647.11	315.45	205.789	297.98	45.1802
319.24	1939.16	304.27	1821.54	318.64	214.064	305.08	200.808	307.44	54.3357	321.92	1654.34	316.61	218.224	301.15	45.8484	326.33	1687.01	318.64	215.986	298.8	49.4672	324.74	1648.03	315.47	205.948	297.99	45.1357
319.25	1938.04	304.28	1818.75	318.65	213.98	305.1	200.723	307.44	54.306	321.92	1655.15	316.61	218.543	301.16	45.8314	326.33	1687.89	318.64	216.079	298.8	49.4923	324.75	1644.93	315.47	206.239	298	45.092
319.25	1937.13	304.28	1819.54	318.66	213.905	305.1	200.639	307.45	54.2848	321.93	1653.61	316.62	218.196	301.16	45.8107	326.34	1685.99	318.65	215.854	298.81	49.4385	324.75	1645.93	315.47	206.202	298	45.1179
319.26	1935.8	304.28	1820.25	318.67	213.774	305.12	200.488	307.46	54.2617	321.94	1652.72	316.62	218.355	301.18	45.7929	326.35	1684.06	318.66	215.751	298.82	49.4153	324.76	1643.02	315.48	206.117	298.01	45.0486
319.26	1935.19	304.29	1816.95	318.68	213.764	305.11	200.498	307.47	54.25	321.95	1650.74	316.63	217.943	301.18	45.771	326.35	1685.04	318.67	215.658	298.83	49.3651	324.76	1643.85	315.49	206.08	298.01	45.0716
319.27	1934.38	304.29	1817.98	318.68	213.727	305.12	200.573	307.48	54.2232	321.95	1651.67	316.63	218.084	301.19	45.7518	326.36	1681.92	318.69	214.983	298.83	49.3891	324.77	1641.65	315.5	206.005	298.02	45.0286
319.27	1933.88	304.3	1815.07	318.69	213.746	305.12	200.545	307.49	54.2005	321.96	1649.72	316.64	217.831	301.19	45.7303	326.36	1683.16	318.69	215.152	298.85	49.3323	324.77	1642.31	315.51	205.873	298.03	44.9852
319.28	1932.69	304.3	1816.06	318.7	213.539	305.12	200.601	307.5	54.1737	321.96	1650.04	316.64	217.906	301.21	45.711	326.37	1679.54	318.69	215.264	298.85	49.357	324.78	1640.46	315.52	205.77	298.03	45.0041
319.28	1931.68	304.31	1814.22	318.71	213.249	305.12	200.629	307.51	54.151	321.97	1648.24	316.65	217.793	301.21	45.691	326.37	1680.87	318.69	215.348	298.86	49.3028	324.78	1641.01	315.53	205.638	298.04	44.9626
319.29	1930.86	304.32	1813.46	318.71	213.446	305.13	200.554	307.51	54.125	321.97	1649.21	316.66	217.55	301.22	45.6766	326.38	1677.05	318.69	215.498	298.87	49.2792	324.79	1638.87	315.54	205.544	298.05	44.9445
319.29	1930.08	304.32	1814.45	318.72	213.08	305.13	200.545	307.52	54.1045	321.98	1646.62	316.66	217.578	301.22	45.6459	326.38	1678.45	318.7	214.72	298.88	49.2527	324.79	1639.68	315.55	205.394	298.06	44.9274
319.3	1928.79	304.32	1814.79	318.73	213.183	305.13	200.817	307.52	54.0674	321.98	1647.54	316.66	217.709	301.23	45.6292	326.39	1674.79	318.7	214.88	298.89	49.2291	324.8	1637.07	315.55	205.281	298.07	44.9096
319.31	1927.84	304.33	1811.46	318.74	212.921	305.13	200.686	307.53	54.0455	321.99	1645.03	316.66	217.728	301.24	45.6092	326.39	1675.97	318.7	215.114	298.9	49.2032	324.8	1637.84	315.56	205.103	298.08	44.8725
319.31	1926.78	304.33	1812.56	318.75	212.677	305.15	200.394	307.54	54.0216	321.99	1645.87	316.67	217.756	301.25	45.5896	326.4	1672.56	318.71	214.683	298.91	49.1767	324.81	1635.32	315.57	205.018	298.08	44.8896
319.32	1926.2	304.34	1810.6	318.76	212.536	305.15	200.272	307.55	54	322	1643.6	316.67	217.372	301.26	45.5681	326.4	1673.78	318.72	214.533	298.92	49.1232	324.81	1636.11	315.57	204.896	298.09	44.867
319.33	1925.62	304.35	1808.67	318.77	212.583	305.16	200.121	307.55	53.9714	322	1644.28	316.67	217.503	301.26	45.5466	326.41	1670.2	318.73	214.374	298.92	49.1483	324.82	1633.42	315.57	204.784	298.1	44.8477
319.33	1925.17	304.35	1809.57	318.78	212.517	305.16	200.009	307.56	53.9498	322.01	1641.99	316.68	217.662	301.27	45.5359	326.41	1671.45	318.75	214.243	298.93	49.0952	324.82	1634.19	315.58	204.652	298.11	44.808
319.34	1924.67	304.36	1807.19	318.79	212.217	305.17	199.905	307.57	53.9406	322.02	1640.8	316.68	217.653	301.28	45.517	326.42	1669.3	318.76	214.102	298.94	49.0712	324.83	1631.94	315.59	204.596	298.11	44.8254
319.35	1924.22	304.36	1807.81	318.79	212.349	305.18	199.764	307.57	53.9168	322.02	1642.89	316.69	217.559	301.29	45.4977	326.43	1667.7	318.77	213.942	298.95	49.0395	324.83	1632.56	315.6	204.492	298.12	44.785
319.35	1923.44	304.37	1805.6	318.8	212.067	305.19	199.322	307.58	53.8874	322.03	1639.17	316.7	217.363	301.29	45.4807	326.43	1668.36	318.77	213.868	298.96	49.0148	324.84	1630.04	315.6	204.408	298.13	44.7546
319.36	1922.9	304.37	1806.28	318.8	212.086	305.2	199.378	307.59	53.8654	322.03	1640.05	316.72	217.007	301.3	45.4496	326.44	1666.18	318.77	213.989	298.97	48.9595	324.84	1630.91	315.6	204.37	298.14	44.7124
319.37	1922.56	304.38	1804.67	318.82	211.467	305.21	199.708	307.6	53.8324	322.03	1641.29	316.72	217.194	301.31	45.4329	326.44	1666.84	318.78	213.764	298.97	48.9816	324.85	1628.92	315.6	204.295	298.14	44.7339
319.37	1921.93	304.39	1803.04	318.82	211.889	305.22	199.538	307.61	53.8112	322.04	1637.57	316.74	216.838	301.32	45.4214	326.45	1664.31	318.78	213.821	298.98	48.9299	324.85	1629.42	315.61	204.257	298.15	44.6753
319.38	1921.01	304.39	1803.94	318.82	211.945	305.23	199.331	307.62	53.7848	322.04	1638.49	316.75	215.648	301.32	45.4051	326.45	1665.24	318.78	214.102	298.99	48.9045	324.86	1627.47	315.61	204.342	298.15	44.6931
319.38	1919.78	304.4	1801.54	318.83	211.429	305.23	199.19	307.63	53.7617	322.05	1636.07	316.75	215.976	301.33	45.3966	326.46	1662.3	318.79	213.652	299	48.8757	324.86	1628.18	315.62	204.173	298.16	44.6523
319.39	1918.76	304.4	1802.42	318.83	211.552	305.25	199.077	307.63	53.7162	322.05	1636.86	316.75	216.107	301.33	45.3781	326.46	1663.23	318.79	213.699	299.01	48.8466	324.87	1625.7	315.63	203.985	298.17	44.6004
319.39	1917.83	304.41	1800.12	318.84	211.186	305.26	199.021	307.64	53.7019	322.06	1634.44	316.77	215.554	301.34	45.3751	326.47	1660.16	318.8	213.577	299.02	48.8016	324.87	1626.47	315.63	203.938	298.17	44.6208
319.4	1916.8	304.42	1798.48	318.84	211.326	305.28	198.946	307.65	53.6762	322.06	1635.39	316.78	215.48	301.35	45.358	326.47	1661.19	318.81	213.502	299.02	48.8255	324.88	1624.88	315.63	203.882	298.18	44.5804
319.4	1916.05	304.42	1799.15	318.84	211.364	305.29	198.729	307.66	53.6579	322.07	1632.18	316.78	215.489	301.36	45.338	326.48	1657.94	318.83	213.033	299.04	48.7484	324.89	1624.26	315.65	203.825	298.19	44.5407
319.41	1915.61	304.43	1797.2	318.85	211.036	305.3	198.297	307.67	53.6315	322.07	1633.7	316.79	215.517	301.37	45.3192	326.48	1658.92	318.84	212.986	299.04	48.7735	324.89	1624.14	315.65	203.76	298.19	44.557
319.41	1914.9	304.43	1797.77	318.86	210.998	305.31	198.391	307.68	53.6175	322.08	1630.47	316.8	215.536	301.38	45.2969	326.49	1656.7	318.86	212.714	299.05	48.7193	324.9	1622.4	315.67	203.619	298.2	44.4947
319.42	1913.89	304.44	1795.61	318.87	210.914	305.32	198.306	307.68	53.5926	322.08	1631.49	316.82	215.498	301.38	45.2799	326.5	1654.41	318.86	212.846	299.06	48.6957	324.9	1623.32	315.66	203.402	298.2	44.5218
319.42	1912.94	304.44	1796.29	318.87	211.017	305.34	198.306	307.69	53.5702	322.09	1628.82	316.82	215.536	301.4	45.2702	326.5	1655.69	318.87	212.395	299.07	48.6691	324.91	1620.73	315.69	203.572	298.22	44.4528
319.43	1911.71	304.45	1794.12	318.89	210.895	305.35	198.306	307.7	53.5405	322.09	1629.76	316.83	214.992	301.4	45.2517	326.51	1653.49	318.87	212.555	299.08	48.6466	324.91	1621.61	315.67	203.468	298.22	44.4751
319.43	1911	304.45	1794.83	318.89	210.886	305.36	198.193	307.71	53.517	322.1	1627.28	316.83	215.283	301.41	45.228	326.52	1651.84	318.87	212.621	299.09	48.5983	324.92	1619.07	315.69	203.299	298.23	44.4272
319.44	1910.21	304.46	1792.47	318.91	210.735	305.35	198.005	307.72	53.4899	322.1	1628.15	316.83	215.433	301.41	45.2109	326.52	1652.58	318.88	212.208	299.09	48.6223	324.92	1620.07	315.68	203.224	298.24	44.4057
319.44	1909.56	304.46	1793.22	318.92	210.698	305.36	197.958	307.72	53.469	322.11	1624.95	316.84	214.824	301.43	45.1943	326.53	1648.93	318.88	212.321	299.11	48.5613	324.93	1616.82	315.7	203.045	298.25	44.3638
319.45	1908.65	304.47	1790.69	318.93	210.529	305.35	197.892	307.73	53.4411	322.11	1626.49	316.84	215.095	301.43	45.1769	326.53	1649.85	318.89	212.095	299.11	48.5835	324.93	1617.78	315.7	202.989	298.25	44.3816
319.45	1908.38	304.47	1791.5	318.93	210.679	305.35	197.666	307.74	53.4195	322.12	1623.06	316.84	215.358	301.44	45.1542	326.53	1650.81	318.89	212.105	299.12	48.5341	324.94	1615.28	315.72	202.923	298.26	44.3396
319.46	1908.01	304.48	1789.07	318.94	210.341	305.35	197.459	307.75	53.3762	322.12	1623.83	316.84	215.508	301.44	45.1365	326.54	1647.32	318.91	212.049	299.13	48.5078	324.94	1616.09	315.72	202.867	298.27	44.32
319.46	1907.79	304.48	1789.74	318.95	210.248	305.35	197.384	307.76	53.3578	322.13	1619.83	316.85	214.917	301.45	45.1142	326.54	1648.16	318.92	211.955	299.14	48.4599	324.95	1613.74	315.73	202.585	298.28	44.2818
319.48	1907.64	304.49	1787.19	318.96	209.666	305.35	197.309	307.77	53.3296	322.13	1621.44	316.86	214.767	301.46	45.0953	326.55	1645.8	318.94	211.72	299.14	48.4809	324.95	1614.6	315.73	202.886	298.28	44.3007
319.48	1907.28	304.49	1788.07	318.96	209.76	305.35	197.29	307.77	53.3083	322.13	1622.32	316.87	214.758	301.47	45.0716	326.55	1646.62	318.94	211.823	299.16	48.4089	324.96	1612.2	315.74	202.745	298.29	44.2632
319.49	1907.81	304.5	1785.34	318.96	209.919	305.37	197.205	307.78	53.2808	322.14	1618.49	316.89	214.636	301.47	45.0545	326.56	1644.3	318.96	211.505	299.16	48.4325	324.96	1613.04	315.74	202.585	298.3	44.2555
319.49	1907.21	304.5	1786.05	318.96	210.013	305.37	197.111	307.79	53.25	322.14	1619.45	316.9	214.533	301.48	45.0371	326.56	1645.18	318.96	211.589	299.17	48.3831	324.97	1611.52	315.74	202.886	298.31	44.2183
319.51	1906.18	304.51	1784.26	318.97	209.535	305.39	197.054	307.8	53.2268	322.14	1620.71	316.92	214.346	301.48	45.0204	326.57	1643.62	318.97	211.261	299.18	48.3595	324.98	1609.64	315.74	202.632	298.31	44.2362
319.51	1905.96	304.51	1784.52	318.98	209.431	305.39	197.007	307.8	53.2063	322.15	1616.26	316.92	214.449	301.5	45.0012	326.58	1642.01	318.97	211.448	299.19	48.3141	324.98	1610.45	315.75	202.491	298.32	44.1987
319.52	1905.53	304.52	1782.57	318.98	209.572	305.4	196.998	307.81	53.178	322.15	1617.8	316.92	214.477	301.5	44.9871	326.58	1642.74	318.98	210.97	299.2	48.2908	324.99	1607.72	315.75	202.387	298.33	44.1575
319.52	1905.08	304.52	1783.3	318.99	209.347	305.41	196.932	307.82	53.1586	322.16	1614.45	316.93	214.224	301.51	44.9663	326.59	1641.1	318.98	211.167	299.21	48.2535	324.99	1608.63	315.77	202.293	298.33	44.1783
319.53	1904.52	304.53	1778.92	319	209.394	305.42	196.8	307.83	53.1318	322.16	1615.28	316.93	214.411	301.51	44.9452	326.59	1641.4	318.99	210.735	299.21	48.2735	325	1606.84	315.77	201.936	298.34	44.113
319.53	1904.09	304.53	1780.16	319.01	208.99	305.43	196.659	307.84	53.1109	322.17	1612.8	316.94	214.093	301.52	44.9218	326.6	1640.56	318.99	210.848	299.22	48.2288	325.01	1605.58	315.79	201.851	298.34	44.1378
319.54	1903.74	304.54	1777.13	319.01	209.131	305.43	197.054	307.85	53.0863	322.17	1613.68	316.94	214.064	301.53	44.9066	326.61	1639.94	319	210.294	299.23	48.2074	325.01	1606.33	315.78	201.767	298.35	44.0937
319.54	1903.2	304.54	1778.03	319.01	209.244	305.44	196.904	307.85	53.0665	322.18	1611.09	316.95	214.018	301.54	44.887	326.62	1638.29	319	210.36	299.24	48.1619	325.02	1603.7	315.8	201.222	298.36	44.0529
319.55	1902.23	304.55	1774.15	319.03	209.075	305.44	196.659	307.87	53.0389	322.18	1612.05	316.95	214.064	301.54	44.8699	326.62	1639.02	319	210.426	299.24	48.1823	325.02	1604.72	315.8	201.316	298.36	44.0718
319.55	1901.93	304.55	1774.88	319.04	208.662	305.46	196.556	307.87	53.0173	322.19	1608.87	316.98	213.727	301.55	44.8451	326.63	1636.67	319	210.445	299.25	48.1387	325.03	1602.27	315.8	201.287	298.37	44.0265
319.56	1901.11	304.55	1775.61	319.04	208.859	305.47	196.452	307.89	52.9931	322.19	1609.42	316.98	213.942	301.55	44.8314	326.63	1637.4	319	210.538	299.26	48.1195	325.03	1602.99	315.81	201.278	298.38	43.9894
319.56	1900.31	304.55	1776.19	319.05	208.53	305.47	196.283	307.89	52.971	322.19	1610.41	316.99	213.099	301.57	44.8006	326.64	1635.13	319	210.67	299.27	48.0936	325.04	1601.69	315.81	201.175	298.38	44.0098
319.57	1898.9	304.56	1772.52	319.06	208.268	305.48	196.094	307.91	52.9307	322.2	1607.31	316.99	213.361	301.57	44.7843	326.64	1635.85	319.01	210.163	299.28	48.0708	325.04	1602.52	315.82	201.081	298.39	43.9716
319.57	1897.95	304.56	1773.25	319.07	208.174	305.49	196.019	307.91	52.9123	322.2	1608.03	316.99	213.464	301.58	44.7617	326.65	1633.37	319.01	210.248	299.29	48.046	325.05	1599.85	315.82	200.874	298.4	43.9512
319.58	1897.13	304.57	1771.19	319.08	208.08	305.49	195.445	307.92	52.8896	322.21	1605.36	316.99	213.614	301.59	44.7435	326.65	1634.17	319.01	210.257	299.3	48.0246	325.05	1600.64	315.83	200.554	298.41	43.9304
319.58	1896.4	304.57	1771.85	319.09	207.929	305.5	195.407	307.93	52.8701	322.21	1606.07	317.01	212.93	301.6	44.719	326.66	1631.79	319.02	210.041	299.31	47.9777	325.06	1598.27	315.83	201.024	298.42	43.9092
319.59	1895.08	304.58	1769.96	319.11	207.939	305.51	195.388	307.94	52.8503	322.22	1604.49	317.02	212.789	301.6	44.7016	326.66	1632.41	319.03	209.882	299.31	47.9995	325.06	1599.21	315.84	200.836	298.43	43.8699
319.59	1894.3	304.58	1770.48	319.12	207.836	305.52	195.313	307.94	52.8282	322.23	1602.76	317.02	212.902	301.61	44.6716	326.67	1630.48	319.04	209.713	299.33	47.9374	325.07	1597.54	315.85	200.629	298.43	43.8914
319.6	1893.47	304.59	1768.5	319.12	207.854	305.52	195.209	307.96	52.8033	322.23	1603.7	317.02	212.752	301.62	44.6556	326.67	1630.98	319.05	209.609	299.33	47.9577	325.08	1595.92	315.85	200.526	298.44	43.851
319.6	1892.82	304.59	1769.27	319.13	207.789	305.52	195.153	307.96	52.7824	322.24	1601.2	317.04	212.63	301.63	44.6249	326.68	1629.2	319.06	209.281	299.34	47.9142	325.08	1596.65	315.86	200.422	298.45	43.8298
319.61	1891.7	304.6	1766.8	319.13	207.751	305.53	195.096	307.97	52.7589	322.24	1602.01	317.04	212.733	301.63	44.6059	326.68	1629.86	319.06	209.412	299.35	47.8905	325.09	1594.15	315.87	200.366	298.46	43.7901
319.61	1890.81	304.6	1767.64	319.14	207.357	305.54	195.012	307.98	52.7321	322.25	1600.57	317.06	212.358	301.64	44.567	326.69	1627.87	319.08	209.159	299.36	47.8591	325.09	1594.96	315.87	200.441	298.46	43.812
319.62	1889.82	304.61	1765.35	319.14	207.517	305.54	194.918	307.99	52.7067	322.26	1599.02	317.06	212.442	301.64	44.5489	326.69	1628.41	319.09	209.084	299.37	47.8104	325.1	1590.75	315.88	200.629	298.47	43.7723
319.62	1888.75	304.61	1765.99	319.14	207.592	305.54	194.852	307.99	52.6829	322.26	1599.76	317.06	212.574	301.65	44.5277	326.7	1626.87	319.1	209.084	299.37	47.8362	325.1	1592.67	315.89	199.962	298.48	43.7519
319.63	1887.28	304.62	1762.96	319.14	207.704	305.55	194.748	308	52.6597	322.27	1597.54	317.07	211.927	301.65	44.5106	326.7	1627.26	319.11	209.103	299.38	47.7908	325.1	1593.37	315.89	199.915	298.49	43.7136
319.63	1886.29	304.62	1763.78	319.15	207.216	305.55	194.616	308.01	52.6296	322.27	1598.2	317.07	212.264	301.66	44.4928	326.71	1626.04	319.12	209	299.39	47.7649	325.11	1589.1	315.91	199.858	298.49	43.7337
319.64	1885.04	304.62	1764.51	319.15	207.272	305.55	194.466	308.02	52.623	322.28	1596.67	317.08	211.833	301.67	44.4776	326.71	1626.16	319.14	208.812	299.4	47.7184	325.11	1590.11	315.91	199.689	298.5	43.6765
319.64	1883.97	304.63	1761.18	319.16	207.207	305.56	194.503	308.02	52.6017	322.29	1595.47	317.09	211.748	301.67	44.4472	326.72	1624.73	319.14	208.896	299.4	47.7431	325.12	1587.26	315.93	199.576	298.5	43.6984
319.65	1882.79	304.63	1762.08	319.17	206.981	305.56	194.343	308.03	52.5767	322.29	1596.37	317.1	211.439	301.68	44.4305	326.72	1625.22	319.15	208.69	299.41	47.6726	325.12	1588.21	315.93	199.454	298.51	43.6606
319.65	1881.79	304.64	1759.72	319.17	207.066	305.56	194.249	308.04	52.5562	322.3	1594.78	317.1	211.598	301.68	44.4079	326.73	1623.17	319.16	208.22	299.41	47.6955	325.13	1586.41	315.94	199.379	298.52	43.6435
319.66	1880.33	304.64	1760.5	319.18	206.831	305.58	194.098	308.04	52.5286	322.31	1593.38	317.12	210.792	301.69	44.3964	326.73	1623.83	319.16	208.324	299.43	47.6127	325.14	1585.49	315.95	199.303	298.53	43.6074
319.66	1879.04	304.65	1758.03	319.18	206.934	305.58	193.976	308.05	52.5066	322.31	1593.95	317.12	211.139	301.7	44.3723	326.74	1621.93	319.16	208.54	299.43	47.6508	325.15	1584.1	315.96	199.237	298.53	43.6275
319.67	1877.81	304.65	1758.91	319.19	206.587	305.58	193.863	308.06	52.4823	322.32	1592.78	317.12	211.289	301.7	44.3549	326.74	1622.53	319.17	208.005	299.44	47.5902	325.15	1584.72	315.97	199.125	298.55	43.5688
319.67	1876.56	304.66	1757.36	319.2	206.69	305.59	193.872	308.07	52.4614	322.33	1591.3	317.12	211.345	301.71	44.3356	326.75	1620.37	319.17	208.052	299.45	47.5643	325.16	1582.5	315.97	198.955	298.55	43.5896
319.68	1875.21	304.67	1755.26	319.21	206.502	305.61	193.787	308.08	52.4331	322.33	1592.18	317.13	210.763	301.71	44.3207	326.75	1621.05	319.17	208.089	299.46	47.52	325.16	1583.36	315.98	198.88	298.56	43.5503
319.69	1873.85	304.67	1756.42	319.21	206.577	305.62	193.552	308.08	52.4085	322.34	1589.7	317.13	210.857	301.72	44.3052	326.76	1618.7	319.17	208.465	299.46	47.544	325.17	1581.77	315.98	198.739	298.57	43.5291
319.69	1872	304.68	1753.65	319.23	206.343	305.63	193.514	308.09	52.3868	322.34	1590.62	317.13	210.904	301.73	44.2907	326.76	1619.52	319.18	207.958	299.47	47.4974	325.18	1579.59	315.99	198.692	298.58	43.4897
319.7	1871.03	304.68	1754.4	319.24	206.286	305.64	193.43	308.1	52.3736	322.35	1588.99	317.13	210.989	301.74	44.2729	326.77	1617.08	319.18	207.958	299.48	47.4834	325.18	1580.32	315.99	198.579	298.58	43.5113
319.7	1868.23	304.69	1752.75	319.24	206.446	305.66	193.345	308.11	52.3475	322.36	1586.97	317.13	211.083	301.74	44.2555	326.77	1617.78	319.19	207.854	299.49	47.4368	325.18	1580.99	316.01	198.485	298.59	43.4608
319.71	1866.81	304.7	1751.03	319.26	206.221	305.66	193.251	308.12	52.3255	322.36	1588.03	317.13	211.214	301.75	44.2313	326.78	1615.47	319.21	207.667	299.49	47.4612	325.19	1578.85	316.01	198.344	298.6	43.4393
319.71	1864.88	304.7	1751.91	319.27	205.761	305.68	193.072	308.13	52.3038	322.37	1586.34	317.14	210.66	301.76	44.2143	326.78	1616.22	319.22	207.573	299.5	47.4158	325.2	1577.5	316.02	198.297	298.61	43.3991
319.72	1862.62	304.71	1749.08	319.27	206.108	305.69	192.968	308.14	52.2807	322.37	1586.96	317.15	210.398	301.77	44.1953	326.79	1613.85	319.23	207.554	299.51	47.3906	325.2	1578.14	316.02	198.221	298.61	43.4207
319.72	1860.7	304.71	1749.98	319.28	205.573	305.7	193.119	308.15	52.2568	322.38	1585.45	317.15	210.52	301.77	44.1768	326.79	1614.6	319.24	207.357	299.52	47.3367	325.21	1576.12	316.03	198.165	298.62	43.3579
319.73	1859.32	304.72	1747.56	319.28	205.61	305.7	193.062	308.15	52.234	322.39	1584.02	317.17	210.388	301.78	44.1549	326.8	1611.77	319.24	207.479	299.52	47.3692	325.21	1576.69	316.03	198.118	298.62	43.3809
319.73	1857.54	304.72	1748.31	319.28	206.07	305.7	192.949	308.16	52.2109	322.39	1584.79	317.18	210.238	301.79	44.1404	326.8	1612.8	319.25	207.019	299.54	47.2871	325.22	1574.55	316.04	197.977	298.64	43.3178
319.74	1856.03	304.73	1745.9	319.3	205.178	305.7	192.893	308.17	52.1885	322.4	1582.48	317.2	210.079	301.8	44.1234	326.81	1609.9	319.25	207.113	299.54	47.3138	325.22	1575.35	316.05	197.817	298.64	43.339
319.74	1854.14	304.73	1746.8	319.3	205.338	305.71	192.808	308.18	52.1664	322.4	1583.33	317.21	209.938	301.81	44.1041	326.81	1610.67	319.25	207.141	299.55	47.2639	325.23	1572.29	316.04	197.723	298.65	43.3
319.75	1852.87	304.74	1745.37	319.32	204.934	305.71	192.751	308.19	52.144	322.41	1581.18	317.23	209.75	301.81	44.0829	326.82	1608.46	319.26	207.216	299.56	47.2361	325.23	1573.1	316.06	197.647	298.66	43.2784
319.75	1851.36	304.75	1744.62	319.32	205.075	305.73	192.638	308.19	52.1172	322.41	1581.86	317.24	209.506	301.82	44.0659	326.82	1609.12	319.26	206.916	299.57	47.1881	325.23	1573.68	316.06	197.553	298.67	43.2294
319.76	1849.27	304.76	1742.69	319.33	204.793	305.72	192.601	308.2	52.0955	322.42	1579.64	317.25	209.403	301.83	44.0484	326.83	1606.95	319.26	207.291	299.57	47.2165	325.24	1570.52	316.07	197.45	298.67	43.2599
319.77	1847.34	304.76	1743.7	319.34	204.38	305.74	192.356	308.21	52.0712	322.42	1580.47	317.26	209.328	301.84	44.0314	326.83	1607.69	319.27	207.075	299.59	47.1408	325.24	1571.42	316.06	197.365	298.68	43.2086
319.78	1845.76	304.77	1741.16	319.34	204.708	305.73	192.318	308.21	52.0503	322.43	1577.97	317.27	209.244	301.84	44.0095	326.84	1606.05	319.28	207.066	299.59	47.1644	325.25	1567.94	316.08	197.29	298.69	43.1878
319.78	1844.07	304.77	1742.02	319.35	204.229	305.75	192.28	308.22	52.0227	322.43	1578.74	317.28	209.197	301.85	43.9902	326.85	1604.42	319.3	206.934	299.6	47.1197	325.25	1568.92	316.08	197.186	298.7	43.1499
319.79	1842.69	304.78	1739.32	319.35	204.239	305.75	192.224	308.23	52.0011	322.44	1576.6	317.29	209.131	301.86	43.9727	326.85	1605.26	319.3	207.019	299.61	47.0945	325.26	1566.27	316.08	197.111	298.7	43.1729
319.78	1841.03	304.78	1740.33	319.35	204.577	305.75	192.196	308.24	51.9761	322.44	1577.37	317.3	209.056	301.86	43.9571	326.86	1602.8	319.32	206.728	299.62	47.0483	325.26	1567.21	316.09	197.054	298.71	43.1317
319.8	1839.65	304.79	1737.41	319.36	204.276	305.76	192.12	308.24	51.9536	322.45	1574.96	317.32	208.868	301.87	43.9382	326.86	1603.65	319.32	206.831	299.62	47.072	325.27	1564.77	316.09	196.932	298.72	43.0949
319.79	1839.01	304.79	1738.44	319.36	204.173	305.75	192.073	308.25	51.9279	322.45	1575.82	317.32	208.943	301.88	43.9196	326.87	1600.83	319.33	205.817	299.64	46.9999	325.27	1565.63	316.1	196.829	298.72	43.112
319.81	1837.8	304.8	1735.33	319.38	204.192	305.76	191.969	308.25	51.9062	322.46	1573.7	317.33	208.305	301.88	43.9007	326.87	1601.82	319.33	205.995	299.64	47.0258	325.28	1562.55	316.11	196.687	298.73	43.0719
319.81	1836.06	304.8	1736.46	319.38	204.229	305.75	191.856	308.26	51.8813	322.46	1574.34	317.33	208.371	301.89	43.8836	326.88	1599.12	319.33	206.033	299.65	46.9644	325.28	1563.17	316.11	196.556	298.74	43.0526
319.82	1834.77	304.81	1733.74	319.4	204.21	305.77	191.753	308.27	51.8588	322.47	1572.95	317.33	208.436	301.9	43.8651	326.88	1600.04	319.33	206.606	299.65	46.977	325.28	1563.97	316.12	196.377	298.75	43.0318
319.82	1834.15	304.81	1734.56	319.4	204.182	305.76	191.564	308.28	51.8298	322.47	1573.81	317.33	208.436	301.9	43.851	326.89	1597.54	319.34	205.422	299.67	46.9178	325.29	1561.15	316.12	196.283	298.76	42.9935
319.83	1833.07	304.82	1732.22	319.41	203.91	305.78	191.432	308.29	51.8077	322.48	1571.23	317.33	208.709	301.91	43.8354	326.89	1598.42	319.34	205.544	299.67	46.9437	325.29	1561.83	316.13	196.17	298.76	43.0125
319.83	1831.67	304.82	1733.08	319.41	204.126	305.78	191.197	308.3	51.7853	322.48	1572.16	317.34	208.145	301.92	43.8213	326.9	1596.02	319.34	205.714	299.69	46.8723	325.3	1559.38	316.14	196.236	298.77	42.9749
319.84	1830.73	304.83	1730.42	319.42	203.985	305.8	191.131	308.3	51.764	322.49	1569.05	317.34	208.436	301.93	43.8024	326.9	1596.84	319.35	205.094	299.69	46.896	325.3	1560.17	316.15	196.207	298.78	42.9541
319.84	1829.54	304.83	1731.38	319.43	203.525	305.81	191.055	308.31	51.7379	322.49	1569.75	317.34	208.812	301.93	43.7864	326.91	1595.11	319.35	205.319	299.7	46.8501	325.31	1557.79	316.16	196.443	298.79	42.9344
319.85	1828.77	304.84	1728.76	319.43	203.637	305.82	190.999	308.32	51.7162	322.49	1570.58	317.35	208.145	301.94	43.7652	326.92	1593.16	319.35	205.394	299.71	46.8265	325.31	1558.5	316.16	196.226	298.8	42.888
319.85	1828.25	304.84	1729.58	319.44	203.402	305.83	190.98	308.33	51.6717	322.5	1566.19	317.35	208.183	301.95	43.7493	326.92	1594.32	319.35	205.394	299.72	46.7788	325.32	1556.36	316.17	195.953	298.8	42.9114
319.87	1827.67	304.85	1727.41	319.45	203.337	305.85	190.923	308.34	51.6489	322.5	1567.04	317.35	208.418	301.96	43.7311	326.93	1592.52	319.36	204.906	299.72	46.8046	325.32	1557	316.17	195.878	298.81	42.8668
319.87	1826.19	304.85	1728.14	319.46	202.951	305.86	190.923	308.35	51.6247	322.5	1568.23	317.35	208.549	301.97	43.7151	326.94	1590.96	319.36	205.047	299.74	46.7288	325.33	1556.34	316.18	195.953	298.82	42.8263
319.88	1825.16	304.86	1725.42	319.46	203.083	305.87	190.876	308.35	51.603	322.51	1564.5	317.36	207.892	301.98	43.6999	326.94	1591.69	319.36	205.188	299.74	46.758	325.33	1556.88	316.18	195.906	298.82	42.8493
319.88	1824.15	304.86	1725.91	319.47	202.726	305.88	190.876	308.37	51.5864	322.51	1565.44	317.36	208.183	301.99	43.6784	326.95	1589.42	319.37	205.037	299.76	46.6811	325.34	1554.85	316.19	195.774	298.83	42.788
319.89	1823.7	304.86	1726.68	319.48	202.322	305.88	190.735	308.37	51.5647	322.52	1562.09	317.37	207.77	301.99	43.6613	326.95	1590.3	319.38	204.868	299.76	46.707	325.34	1555.55	316.19	195.652	298.83	42.8062
319.89	1821.7	304.87	1724.8	319.48	202.444	305.89	190.565	308.38	51.5434	322.52	1562.87	317.37	207.845	302	43.6461	326.96	1587.91	319.39	204.765	299.77	46.6341	325.35	1553.25	316.2	195.388	298.84	42.7731
319.9	1820.04	304.87	1725.63	319.48	202.585	305.89	190.754	308.38	51.5232	322.52	1563.79	317.37	207.995	302.01	43.626	326.96	1588.68	319.41	204.727	299.77	46.6589	325.35	1553.91	316.21	195.548	298.85	42.7345
319.9	1817.91	304.87	1726.02	319.49	202.303	305.9	190.461	308.4	51.5011	322.53	1559.91	317.38	207.197	302.02	43.6071	326.97	1587.31	319.42	204.699	299.78	46.6112	325.36	1552.1	316.22	195.765	298.85	42.7527
319.91	1816.56	304.88	1722.59	319.5	202.162	305.9	190.301	308.4	51.4805	322.53	1560.59	317.38	207.347	302.02	43.5874	326.98	1586.04	319.44	204.577	299.79	46.5845	325.36	1552.61	316.24	195.671	298.86	42.7178
319.91	1815.25	304.88	1723.25	319.51	202.35	305.9	190.037	308.41	51.4559	322.53	1561.27	317.38	207.545	302.03	43.5703	326.98	1586.58	319.45	204.455	299.8	46.5261	325.37	1550.73	316.24	195.53	298.87	42.6821
319.92	1814.06	304.88	1724.09	319.52	202.387	305.91	189.934	308.42	51.4257	322.54	1558.52	317.38	207.704	302.04	43.5499	326.99	1584.76	319.46	204.37	299.8	46.5631	325.37	1551.37	316.26	195.369	298.87	42.7007
319.92	1813.01	304.89	1721.05	319.52	202.303	305.92	189.886	308.42	51.4018	322.54	1559.23	317.39	206.859	302.05	43.5496	326.99	1585.43	319.48	204.041	299.81	46.5039	325.38	1549.17	316.27	195.238	298.88	42.6672
319.93	1812.35	304.89	1721.77	319.54	201.917	305.94	189.839	308.43	51.3831	322.55	1556.21	317.39	207.01	302.05	43.5325	327	1583.38	319.48	204.088	299.82	46.4765	325.38	1549.83	316.28	194.983	298.89	42.6427
319.93	1811.96	304.9	1719.42	319.54	202.228	305.93	189.736	308.44	51.3581	322.55	1557.8	317.41	206.643	302.06	43.5154	327	1583.93	319.5	203.703	299.83	46.455	325.39	1547.44	316.29	194.578	298.89	42.6594
319.94	1811.49	304.9	1720.17	319.54	202.303	305.94	189.311	308.44	51.3397	322.56	1555.19	317.41	206.728	302.07	43.4961	327.01	1582.27	319.5	203.882	299.84	46.4303	325.39	1548.23	316.29	194.456	298.9	42.6234
319.95	1810.33	304.91	1717.85	319.54	202.312	305.94	189.217	308.45	51.3176	322.56	1555.27	317.44	206.502	302.08	43.4823	327.01	1582.84	319.5	203.919	299.85	46.3859	325.4	1545.71	316.29	194.616	298.91	42.604
319.95	1809.59	304.91	1718.64	319.55	202.228	305.94	189.161	308.46	51.2963	322.56	1555.43	317.44	206.549	302.08	43.4701	327.02	1581.71	319.51	203.788	299.85	46.4099	325.4	1546.55	316.29	194.569	298.92	42.5747
319.95	1809.29	304.92	1716.09	319.55	202.246	305.94	189.132	308.47	51.2702	322.57	1554.04	317.46	206.502	302.09	43.4537	327.02	1582.18	319.52	203.252	299.87	46.3407	325.41	1544.24	316.3	194.56	298.92	42.5847
319.96	1808.69	304.92	1716.82	319.57	201.635	305.94	189	308.47	51.2503	322.57	1554.42	317.47	206.465	302.09	43.4322	327.03	1580.69	319.52	203.562	299.87	46.3644	325.41	1544.93	316.29	194.55	298.93	42.5564
319.96	1807.85	304.93	1713.76	319.57	201.852	305.96	188.821	308.49	51.226	322.58	1552.63	317.49	206.437	302.1	43.4162	327.03	1581.2	319.52	203.637	299.88	46.3207	325.42	1542.86	316.3	194.541	298.94	42.5397
319.97	1807.08	304.93	1714.49	319.58	201.541	305.96	188.764	308.49	51.2047	322.58	1553.27	317.5	206.577	302.1	43.3958	327.04	1578.8	319.53	203.299	299.89	46.2974	325.42	1543.48	316.3	194.371	298.95	42.5037
319.97	1806.24	304.93	1715.24	319.59	201.287	305.98	188.689	308.5	51.1811	322.59	1551.07	317.51	206.333	302.11	43.3806	327.04	1580	319.53	203.459	299.9	46.2452	325.43	1541.87	316.3	194.239	298.95	42.5204
319.98	1805.68	304.94	1712.45	319.6	201.222	305.99	188.614	308.51	51.1591	322.59	1551.77	317.51	206.493	302.12	43.362	327.05	1577.57	319.54	202.801	299.9	46.2715	325.43	1542.34	316.31	194.079	298.96	42.484
319.98	1804.65	304.94	1713.26	319.61	200.582	305.99	188.5	308.52	51.1333	322.6	1549.62	317.52	206.108	302.12	43.3486	327.05	1579.49	319.54	202.98	299.92	46.199	325.44	1540.42	316.32	193.816	298.96	42.4981
319.99	1804.01	304.95	1711.12	319.62	200.31	306	188.416	308.52	51.1131	322.6	1550.26	317.53	205.948	302.13	43.3316	327.06	1576.01	319.54	203.073	299.92	46.2253	325.44	1541.02	316.32	193.665	298.97	42.4427
320	1803.36	304.95	1711.79	319.62	200.808	306.01	188.236	308.53	51.0899	322.61	1548.12	317.53	206.005	302.14	43.3156	327.06	1576.91	319.55	202.669	299.93	46.1775	325.45	1539.01	316.34	193.571	298.97	42.4646
320	1802.87	304.96	1709.56	319.63	200.761	306.03	188.453	308.54	51.0697	322.61	1548.81	317.54	205.479	302.14	43.2944	327.06	1578.29	319.55	202.726	299.94	46.1553	325.45	1539.66	316.34	193.458	298.98	42.4252
320.01	1802.05	304.96	1710.41	319.63	200.855	306.01	188.34	308.55	51.0417	322.62	1546.48	317.54	205.742	302.15	43.2781	327.07	1574.79	319.55	202.782	299.95	46.109	325.46	1537.44	316.35	193.345	298.99	42.41
320.01	1801.77	304.97	1708.93	319.63	200.498	306.04	188.284	308.56	51.0229	322.62	1547.21	317.54	205.854	302.16	43.2569	327.07	1575.47	319.55	202.914	299.95	46.1353	325.46	1538.23	316.35	193.505	299	42.3694
320.02	1799.43	304.98	1707.14	319.64	200.544	306.02	188.189	308.57	51.0012	322.63	1545.07	317.55	205.216	302.17	43.2409	327.08	1573.49	319.56	202.322	299.96	46.0905	325.47	1536.3	316.35	193.75	299	42.388
320.02	1798.31	304.98	1707.99	319.64	200.667	306.04	188.133	308.57	50.9828	322.63	1545.71	317.55	205.272	302.17	43.2212	327.08	1574.24	319.56	202.547	299.97	46.0624	325.47	1536.77	316.36	193.966	299.01	42.3512
320.03	1796.72	304.99	1705.51	319.65	200.488	306.04	188.265	308.58	50.9571	322.64	1542.6	317.55	205.291	302.19	43.2027	327.09	1572.19	319.57	202.237	299.98	45.9995	325.48	1535.56	316.35	193.769	299.02	42.3378
320.03	1795.58	304.99	1706.3	319.66	200.309	306.06	188.199	308.59	50.9372	322.64	1544.03	317.56	204.793	302.19	43.1833	327.09	1572.83	319.58	202.096	299.98	46.0402	325.49	1534.88	316.36	193.674	299.03	42.3073
320.04	1793.13	305	1705.01	319.67	200.413	306.06	188.199	308.6	50.9144	322.65	1541.13	317.56	205.291	302.2	43.1677	327.1	1570.86	319.59	201.993	300	45.9577	325.5	1532.59	316.36	193.552	299.03	42.3215
320.04	1791.82	305	1705.74	319.68	199.717	306.08	187.887	308.6	50.8938	322.65	1541.81	317.57	204.633	302.21	43.1466	327.1	1571.63	319.6	201.842	300	45.9776	325.5	1533.36	316.37	193.364	299.04	42.2888
320.05	1790.15	305.01	1703.39	319.68	200.253	306.08	187.784	308.62	50.8669	322.66	1540.4	317.57	204.924	302.22	43.1284	327.11	1569.2	319.62	201.795	300.01	45.9384	325.5	1534.04	316.37	193.26	299.05	42.2746
320.05	1788.74	305.01	1704.11	319.7	199.604	306.09	187.68	308.62	50.8467	322.67	1538.63	317.58	204.718	302.22	43.1098	327.11	1570.13	319.63	201.729	300.02	45.911	325.51	1531.93	316.38	193.166	299.06	42.24
320.06	1786.67	305.02	1701.76	319.71	199.519	306.09	187.576	308.63	50.8227	322.67	1539.63	317.59	204.474	302.23	43.0949	327.12	1568.28	319.64	201.692	300.03	45.8625	325.52	1530.46	316.39	193.147	299.06	42.2534
320.07	1785.08	305.02	1702.55	319.72	199.614	306.11	187.482	308.63	50.8018	322.68	1537.78	317.59	204.614	302.24	43.0767	327.12	1568.53	319.65	201.645	300.03	45.8884	325.52	1531.16	316.4	192.808	299.07	42.2259
320.07	1782.74	305.03	1700.1	319.72	199.567	306.1	187.189	308.65	50.7797	322.69	1536.43	317.59	204.765	302.25	43.0593	327.13	1566.76	319.66	201.579	300.04	45.8417	325.53	1529.1	316.41	192.761	299.08	42.2103
320.08	1781.32	305.03	1700.83	319.72	199.519	306.12	187.105	308.65	50.7602	322.69	1537.03	317.6	204.38	302.25	43.0407	327.13	1567.57	319.66	201.767	300.05	45.8184	325.53	1529.72	316.43	192.619	299.09	42.1716
320.08	1779.82	305.04	1698.99	319.72	199.407	306.11	187.001	308.66	50.7355	322.7	1535.09	317.61	204.173	302.26	43.0247	327.14	1565.52	319.67	200.893	300.06	45.7958	325.54	1526.26	316.42	192.761	299.09	42.1895
320.09	1778.58	305.04	1699.61	319.73	199.614	306.12	186.869	308.66	50.7167	322.7	1535.73	317.61	204.257	302.27	43.0043	327.14	1566.36	319.67	201.184	300.07	45.774	325.54	1527.05	316.45	192.695	299.1	42.1422
320.09	1776.79	305.05	1695.09	319.74	199.99	306.11	186.765	308.68	50.6877	322.71	1534.19	317.62	204.004	302.27	42.9883	327.15	1564.2	319.67	201.429	300.08	45.731	325.55	1523.89	316.43	192.685	299.1	42.1534
320.1	1775.42	305.05	1697.21	319.74	199.952	306.12	186.642	308.68	50.6674	322.72	1532.57	317.63	203.666	302.28	42.9682	327.15	1564.86	319.67	201.663	300.08	45.7544	325.55	1524.72	316.45	192.591	299.12	42.1039
320.1	1774.67	305.05	1698.05	319.75	199.99	306.12	186.586	308.69	50.6439	322.72	1533.41	317.63	203.91	302.29	42.9504	327.16	1562.71	319.68	200.742	300.09	45.7107	325.55	1525.43	316.44	192.45	299.12	42.1229
320.11	1774.13	305.06	1693.29	319.75	199.858	306.12	186.51	308.69	50.6295	322.73	1531.95	317.64	203.628	302.29	42.9333	327.16	1563.52	319.68	201.287	300.1	45.6844	325.56	1521.56	316.45	192.365	299.13	42.0849
320.11	1773.38	305.06	1694.11	319.77	199.661	306.13	186.397	308.7	50.6074	322.74	1530.5	317.65	203.487	302.3	42.9218	327.17	1561.4	319.68	201.504	300.11	45.6647	325.56	1522.31	316.45	192.252	299.14	42.0701
320.12	1772.78	305.07	1692.67	319.77	199.773	306.13	186.387	308.71	50.589	322.74	1531.21	317.66	203.431	302.3	42.9047	327.17	1562.08	319.69	200.469	300.12	45.6459	325.56	1523.25	316.45	192.177	299.15	42.0325
320.12	1771.99	305.07	1692.54	319.79	199.294	306.13	186.416	308.72	50.5669	322.75	1530.25	317.67	203.28	302.31	42.8891	327.18	1559.78	319.69	200.799	300.13	45.627	325.57	1520.07	316.46	191.753	299.15	42.0489
320.13	1771.49	305.08	1690.48	319.8	199.388	306.14	186.35	308.72	50.5474	322.76	1528.84	317.67	203.393	302.32	42.8739	327.18	1560.76	319.69	201.147	300.14	45.6058	325.57	1520.76	316.47	191.555	299.16	42.0139
320.13	1770.78	305.08	1691.13	319.81	198.353	306.15	186.293	308.74	50.5246	322.76	1529.63	317.68	203.12	302.33	42.8434	327.19	1559.2	319.7	200.601	300.15	45.5658	325.58	1518.13	316.47	191.244	299.17	41.9975
320.14	1769.99	305.08	1691.92	319.81	198.428	306.16	186.265	308.74	50.5018	322.77	1527.09	317.69	203.13	302.33	42.8244	327.2	1558.01	319.71	200.347	300.15	45.587	325.58	1518.71	316.49	190.97	299.18	41.9492
320.15	1768.94	305.09	1688.41	319.81	198.513	306.17	186.133	308.75	50.4719	322.77	1527.45	317.7	202.735	302.34	42.8088	327.2	1558.56	319.72	200.291	300.17	45.5255	325.58	1519.41	316.49	190.848	299.18	41.964
320.15	1768.14	305.09	1689.09	319.81	198.626	306.18	186.038	308.76	50.4495	322.77	1528.16	317.7	202.876	302.34	42.7891	327.21	1556.56	319.73	199.999	300.17	45.5507	325.59	1516.73	316.5	190.688	299.19	41.932
320.16	1768.25	305.09	1689.73	319.82	198.099	306.19	185.953	308.77	50.4256	322.78	1524.53	317.7	202.989	302.35	42.7728	327.21	1557.18	319.73	200.14	300.18	45.4821	325.59	1517.2	316.51	190.584	299.2	41.9004
320.17	1768.18	305.1	1686.69	319.82	198.108	306.2	185.812	308.77	50.4079	322.78	1525.83	317.71	202.406	302.36	42.7501	327.22	1554.44	319.75	199.915	300.18	45.5066	325.59	1517.66	316.51	190.49	299.2	41.919
320.17	1767.39	305.1	1687.29	319.82	198.118	306.2	185.595	308.78	50.3887	322.79	1522.8	317.71	202.613	302.37	42.7349	327.22	1555.15	319.76	199.858	300.2	45.4358	325.6	1515.45	316.52	190.518	299.21	41.8785
320.18	1766.81	305.1	1687.91	319.82	198.193	306.21	185.538	308.79	50.3692	322.79	1523.74	317.72	202.171	302.37	42.7167	327.23	1552.86	319.77	199.802	300.2	45.4599	325.6	1515.96	316.52	190.603	299.22	41.8576
320.18	1765.82	305.11	1685.17	319.82	198.287	306.23	185.359	308.8	50.3401	322.8	1521.16	317.72	202.293	302.38	42.7025	327.23	1553.59	319.78	199.792	300.21	45.3925	325.61	1513.33	316.53	190.697	299.23	41.8245
320.19	1765.09	305.11	1685.9	319.83	198.108	306.23	185.217	308.81	50.3235	322.8	1521.91	317.73	201.936	302.39	42.6866	327.24	1552.37	319.79	199.679	300.21	45.4158	325.61	1514.17	316.53	190.735	299.23	41.8405
320.19	1763.8	305.12	1684.27	319.85	197.826	306.24	185.114	308.81	50.2974	322.81	1519.8	317.74	201.635	302.4	42.6702	327.24	1552.27	319.79	199.745	300.22	45.3736	325.61	1514.8	316.55	190.735	299.24	41.7799
320.2	1762.97	305.13	1682.8	319.85	197.873	306.25	185.057	308.82	50.2797	322.81	1520.37	317.75	201.504	302.4	42.6501	327.25	1550.84	319.81	199.642	300.23	45.3532	325.62	1512.61	316.54	190.631	299.24	41.8089
320.21	1761.83	305.13	1683.59	319.85	197.986	306.26	185.038	308.83	50.2587	322.82	1518.26	317.76	201.156	302.41	42.6323	327.25	1551.37	319.81	199.651	300.24	45.3314	325.63	1511.23	316.56	190.612	299.25	41.7646
320.21	1760.89	305.14	1681.47	319.85	198.005	306.26	185	308.84	50.2388	322.82	1518.99	317.76	201.316	302.41	42.6137	327.26	1549.41	319.82	198.588	300.25	45.2884	325.63	1511.93	316.56	190.433	299.26	41.7445
320.22	1759.66	305.14	1681.92	319.87	197.723	306.29	184.925	308.84	50.2153	322.83	1516.94	317.77	200.949	302.42	42.6018	327.26	1550	319.82	200.046	300.25	45.3084	325.64	1509.54	316.57	190.395	299.27	41.7103
320.22	1758.46	305.15	1679.73	319.88	197.563	306.27	184.859	308.86	50.1947	322.83	1517.6	317.79	200.864	302.43	42.5873	327.27	1548.13	319.82	200.178	300.26	45.2617	325.64	1510.28	316.58	190.188	299.27	41.73
320.23	1757	305.15	1680.65	319.89	197.516	306.29	184.991	308.86	50.1733	322.84	1515.62	317.8	200.582	302.44	42.5728	327.27	1548.76	319.83	198.598	300.27	45.2424	325.65	1507.09	316.6	190.084	299.28	41.6932
320.23	1755.65	305.16	1677.2	319.91	197.13	306.27	184.982	308.87	50.1519	322.84	1516.17	317.8	200.676	302.44	42.5557	327.28	1547.08	319.83	199.35	300.28	45.2213	325.65	1508.03	316.61	189.952	299.29	41.6612
320.24	1754.79	305.16	1677.91	319.91	197.139	306.3	184.991	308.88	50.1243	322.85	1514.1	317.81	200.432	302.45	42.5431	327.28	1547.55	319.83	199.454	300.29	45.1994	325.65	1508.73	316.62	189.934	299.29	41.6768
320.24	1754.31	305.16	1678.43	319.91	197.318	306.28	184.934	308.89	50.1026	322.85	1514.85	317.81	200.517	302.45	42.5237	327.29	1545.74	319.83	199.755	300.3	45.1576	325.66	1505.25	316.63	189.849	299.3	41.621
320.25	1753.86	305.16	1679.07	319.93	197.064	306.32	184.849	308.89	50.0797	322.86	1512.78	317.82	200.253	302.46	42.5104	327.29	1546.37	319.83	199.886	300.3	45.1772	325.66	1506.26	316.64	189.792	299.3	41.6407
320.26	1753.58	305.17	1674.68	319.95	196.866	306.3	184.812	308.91	50.0606	322.86	1513.4	317.82	200.3	302.46	42.4925	327.3	1543.86	319.84	198.541	300.31	45.1365	325.67	1503.8	316.65	189.792	299.31	41.599
320.26	1753.11	305.17	1676.54	319.95	196.998	306.32	184.802	308.91	50.0388	322.87	1511.42	317.83	200.291	302.47	42.4776	327.3	1544.78	319.84	198.645	300.32	45.1161	325.67	1504.42	316.66	189.707	299.32	41.5629
320.27	1753.01	305.18	1673.56	319.96	196.584	306.32	184.717	308.92	50.02	322.87	1512.08	317.83	200.3	302.48	42.4572	327.31	1542.22	319.84	198.617	300.33	45.0927	325.68	1502.49	316.66	189.651	299.32	41.5826
320.27	1752.77	305.18	1674.17	319.96	196.81	306.34	184.491	308.92	49.9979	322.88	1510.16	317.84	200.366	302.49	42.4468	327.31	1542.92	319.84	199.275	300.34	45.0527	325.68	1503.21	316.67	189.585	299.33	41.5253
320.27	1752.66	305.19	1672.07	319.97	196.405	306.34	184.472	308.93	49.9799	322.88	1510.63	317.84	200.338	302.49	42.4263	327.32	1540.7	319.84	199.595	300.34	45.0731	325.69	1501.21	316.67	189.575	299.33	41.5424
320.28	1752.77	305.19	1672.88	319.97	196.527	306.36	184.472	308.94	49.9578	322.89	1508.99	317.85	201.062	302.5	42.4111	327.32	1541.41	319.85	198.569	300.35	45.0327	325.69	1501.89	316.68	189.632	299.34	41.5067
320.28	1752.77	305.2	1668.68	319.99	196.01	306.35	184.377	308.95	49.939	322.89	1509.56	317.85	200.94	302.5	42.3899	327.33	1538.57	319.86	198.579	300.36	45.0112	325.7	1499.99	316.68	189.604	299.35	41.4687
320.29	1752.9	305.2	1669.93	319.99	196.179	306.36	184.236	308.95	49.9117	322.9	1507.54	317.86	201.24	302.51	42.3743	327.33	1539.27	319.87	198.325	300.37	44.9682	325.7	1500.72	316.68	189.575	299.35	41.4859
320.29	1752.75	305.2	1670.68	320.01	195.699	306.36	184.123	308.97	49.8937	322.9	1508.2	317.86	201.24	302.52	42.3531	327.34	1536.8	319.88	198.344	300.37	44.9915	325.71	1498.39	316.69	189.556	299.36	41.4516
320.3	1752.69	305.2	1671.51	320.01	195.859	306.37	184.028	308.97	49.8701	322.91	1505.53	317.87	201.24	302.52	42.3401	327.34	1537.71	319.89	198.297	300.38	44.9244	325.71	1499.33	316.7	189.519	299.37	41.4192
320.3	1752.62	305.21	1667.91	320.02	195.614	306.38	184.075	308.99	49.8494	322.91	1506.13	317.87	201.222	302.53	42.3233	327.35	1535.39	319.9	198.08	300.38	44.9482	325.72	1496.92	316.7	189.462	299.37	41.4378
320.3	1752.58	305.22	1666.65	320.03	195.501	306.39	184	308.99	49.8274	322.91	1506.77	317.87	201.259	302.54	42.3096	327.35	1536.13	319.92	197.967	300.39	44.904	325.72	1497.65	316.7	189.424	299.38	41.3798
320.31	1752.32	305.22	1667.23	320.04	195.661	306.4	183.915	309	49.8097	322.92	1504.25	317.88	201.184	302.55	42.291	327.36	1533.98	319.93	198.099	300.4	44.88	325.73	1496.37	316.71	189.321	299.38	41.3995
320.31	1752.17	305.23	1665	320.05	195.52	306.4	183.641	309	49.7846	322.92	1505.04	317.89	200.507	302.55	42.2776	327.36	1534.55	319.93	198.212	300.41	44.8596	325.74	1495.67	316.71	189.142	299.39	41.3645
320.32	1751.98	305.23	1665.79	320.06	194.353	306.41	183.632	309.02	49.7595	322.93	1502.87	317.89	200.62	302.56	42.2594	327.37	1533.11	319.93	198.297	300.42	44.8217	325.75	1494.36	316.72	189.132	299.4	41.3466
320.33	1751.93	305.24	1664.15	320.06	195.078	306.41	183.509	309.02	49.7371	322.93	1503.64	317.9	200.357	302.57	42.2423	327.38	1531.64	319.94	198.061	300.42	44.841	325.75	1495.05	316.72	189.066	299.41	41.3143
320.33	1752.13	305.25	1661.43	320.06	195.059	306.41	183.405	309.03	49.7168	322.94	1500.42	317.9	200.432	302.57	42.2214	327.38	1532.47	319.95	197.788	300.43	44.7951	325.76	1493.21	316.73	188.934	299.41	41.3317
320.34	1750.62	305.25	1663.46	320.06	195.2	306.43	183.197	309.03	49.6928	322.94	1501.05	317.91	200.206	302.58	42.2058	327.39	1530.52	319.95	197.883	300.44	44.7728	325.76	1493.83	316.73	189.161	299.42	41.299
320.34	1749.19	305.26	1660.01	320.06	195.341	306.43	182.961	309.05	49.6759	322.94	1502.34	317.91	200.262	302.59	42.1854	327.39	1531.12	319.96	197.657	300.45	44.7265	325.77	1491.91	316.74	189.123	299.43	41.2789
320.34	1747.13	305.26	1660.78	320.07	194.108	306.44	182.801	309.05	49.6545	322.95	1499.74	317.92	199.915	302.6	42.1701	327.4	1528.86	319.96	197.713	300.45	44.7483	325.77	1492.66	316.75	189	299.44	41.2443
320.34	1746.06	305.27	1658.34	320.07	194.917	306.44	182.583	309.06	49.6387	322.96	1498.39	317.92	200.009	302.6	42.1512	327.4	1529.8	319.98	197.101	300.47	44.6779	325.78	1490.63	316.75	188.906	299.44	41.2625
320.35	1744.28	305.27	1659.22	320.08	194.305	306.46	182.451	309.07	49.618	322.96	1499.22	317.93	199.858	302.61	42.1377	327.41	1527.18	319.98	197.158	300.47	44.7035	325.78	1491.38	316.76	188.83	299.45	41.2309
320.35	1743.18	305.28	1656.76	320.08	194.466	306.47	182.376	309.08	49.6003	322.97	1496.67	317.94	199.717	302.62	42.1229	327.41	1527.88	319.99	196.631	300.48	44.6568	325.79	1489.12	316.76	189.151	299.46	41.1951
320.36	1740.89	305.28	1657.68	320.08	194.927	306.49	182.329	309.08	49.576	322.97	1497.45	317.95	199.567	302.62	42.1073	327.42	1526.98	319.99	196.697	300.49	44.6352	325.79	1489.98	316.78	188.962	299.46	41.2115
320.36	1739.38	305.29	1655.95	320.09	193.627	306.49	182.659	309.09	49.5576	322.98	1495.11	317.96	199.463	302.63	42.0931	327.42	1526.36	319.99	196.819	300.5	44.5945	325.8	1487.55	316.77	188.623	299.47	41.1799
320.37	1737.48	305.3	1655.03	320.09	193.429	306.5	182.574	309.1	49.534	322.98	1495.96	317.97	199.331	302.64	42.0756	327.43	1525.23	319.99	196.951	300.5	44.6126	325.8	1488.4	316.78	187.963	299.48	41.1657
320.37	1736.38	305.31	1653.55	320.09	193.571	306.5	182.48	309.11	49.5163	322.99	1493.62	317.98	199.219	302.65	42.0604	327.43	1526.22	320	196.462	300.51	44.5729	325.81	1486.84	316.78	187.623	299.49	41.1329
320.38	1735.18	305.31	1654.34	320.09	193.976	306.51	182.328	309.11	49.4975	322.99	1494.41	317.99	199.228	302.65	42.0448	327.44	1523.44	320	196.546	300.52	44.5548	325.82	1485.22	316.78	187.293	299.49	41.1489
320.38	1734.64	305.32	1650.96	320.11	193.608	306.51	182.262	309.12	49.4765	323	1492.17	317.99	199.256	302.67	42.0239	327.44	1524.53	320.01	196.217	300.53	44.5125	325.82	1485.9	316.78	187.208	299.5	41.1102
320.38	1733.57	305.32	1651.82	320.12	194.39	306.51	182.168	309.12	49.4584	323	1492.94	318	199.106	302.67	42.0206	327.45	1521.61	320.02	196.311	300.53	44.5329	325.83	1484.5	316.79	187.095	299.51	41.0711
320.39	1732.71	305.32	1652.8	320.12	193.768	306.51	181.988	309.13	49.4396	323.01	1490.1	318.01	199.03	302.68	42.0061	327.45	1522.38	320.03	196.123	300.54	44.5047	325.84	1483.11	316.79	186.491	299.51	41.0923
320.39	1731.49	305.33	1649.5	320.12	193.825	306.51	181.828	309.14	49.4164	323.01	1490.72	318.01	198.955	302.69	41.9908	327.46	1520.16	320.03	196.189	300.55	44.4624	325.84	1483.92	316.79	186.548	299.52	41.0536
320.4	1730.87	305.33	1650.1	320.13	194.484	306.52	181.384	309.14	49.3961	323.01	1491.47	318.01	198.983	302.7	42.0009	327.46	1520.8	320.06	195.925	300.55	44.4858	325.85	1481.96	316.8	186.491	299.53	41.0223
320.4	1729.6	305.34	1647.58	320.14	194.974	306.52	181.271	309.15	49.3729	323.02	1488.53	318.01	199.059	302.7	41.9849	327.47	1519.56	320.06	195.897	300.56	44.4431	325.85	1482.43	316.81	186.435	299.53	41.0376
320.41	1728.85	305.34	1648.18	320.15	195.304	306.53	181.242	309.16	49.3541	323.02	1489.25	318.02	198.758	302.71	41.9655	327.48	1518.05	320.06	195.972	300.57	44.3975	325.86	1480.83	316.81	186.586	299.54	41.0048
320.41	1727.65	305.35	1645.03	320.16	195.2	306.53	181.129	309.16	49.3305	323.03	1487.2	318.02	198.87	302.71	41.9488	327.48	1518.75	320.06	196.094	300.57	44.4194	325.86	1481.51	316.82	186.906	299.55	40.9735
320.41	1727.12	305.35	1645.87	320.16	194.87	306.54	181.101	309.17	49.3109	323.03	1487.8	318.02	198.965	302.73	41.9328	327.49	1516.23	320.06	196.076	300.58	44.376	325.87	1479.51	316.83	186.869	299.55	40.9903
320.42	1725.4	305.35	1646.68	320.16	194.88	306.54	181.063	309.18	49.2874	323.04	1485.99	318.03	198.617	302.73	41.9172	327.49	1517.06	320.07	195.831	300.59	44.3315	325.87	1480.26	316.84	186.784	299.56	40.9586
320.42	1724.5	305.36	1643.47	320.18	195.256	306.55	180.959	309.19	49.2704	323.04	1486.44	318.03	198.729	302.74	41.8993	327.5	1514.85	320.07	195.887	300.59	44.3552	325.88	1477.4	316.86	186.699	299.57	40.9233
320.43	1722.33	305.36	1644.28	320.19	194.578	306.56	180.846	309.19	49.2516	323.05	1484.65	318.05	198.466	302.74	41.8852	327.5	1515.47	320.08	195.727	300.6	44.3163	325.88	1478.09	316.86	186.614	299.57	40.9393
320.44	1720.9	305.37	1642.02	320.2	194.117	306.56	180.666	309.2	49.2324	323.05	1485.33	318.05	198.513	302.76	41.8699	327.51	1513.72	320.08	195.821	300.61	44.2792	325.88	1478.51	316.87	186.755	299.58	40.9087
320.45	1719.06	305.37	1642.78	320.2	194.503	306.57	180.515	309.21	49.2096	323.06	1483.18	318.06	198.061	302.76	41.8543	327.51	1514.17	320.09	195.53	300.61	44.2981	325.88	1479	316.88	186.954	299.59	40.8774
320.45	1717.94	305.38	1640.33	320.21	193.825	306.57	180.421	309.22	49.1904	323.06	1483.8	318.06	198.287	302.77	41.839	327.52	1513.16	320.1	195.435	300.62	44.258	325.89	1476.25	316.89	186.878	299.59	40.8942
320.46	1715.54	305.38	1641.2	320.22	193.731	306.58	180.364	309.22	49.1683	323.07	1481.05	318.08	198.259	302.77	41.8227	327.53	1511.69	320.12	195.322	300.63	44.2399	325.89	1476.92	316.89	186.755	299.6	40.8625
320.46	1714.1	305.39	1638.85	320.22	193.74	306.58	180.269	309.23	49.1476	323.07	1481.77	318.08	197.977	302.79	41.8111	327.53	1512.57	320.13	195.162	300.64	44.2172	325.9	1474.7	316.9	187.086	299.61	40.8305
320.47	1711.71	305.39	1639.68	320.23	193.024	306.59	180.713	309.24	49.1262	323.07	1482.43	318.09	198.042	302.79	41.7974	327.54	1510.35	320.14	194.814	300.65	44.1979	325.9	1475.62	316.9	186.878	299.61	40.8443
320.48	1710.72	305.4	1637.22	320.24	192.893	306.59	180.704	309.25	49.1089	323.08	1479.7	318.09	198.09	302.8	41.7855	327.54	1511.1	320.14	194.814	300.66	44.1605	325.91	1473.15	316.9	186.765	299.62	40.8148
320.49	1707.89	305.4	1638.1	320.25	192.855	306.59	180.685	309.26	49.0889	323.08	1480.45	318.1	198.165	302.79	41.7709	327.55	1508.86	320.14	194.946	300.66	44.1775	325.91	1473.93	316.91	186.671	299.63	40.8018
320.49	1706.18	305.41	1635.51	320.25	192.987	306.6	180.704	309.26	49.069	323.09	1478.43	318.11	198.061	302.81	41.7538	327.55	1509.71	320.14	195.096	300.67	44.1371	325.92	1472.1	316.91	186.689	299.64	40.7701
320.5	1703.33	305.41	1636.48	320.26	192.704	306.6	180.666	309.27	49.0506	323.09	1479.19	318.12	197.986	302.81	41.7367	327.56	1507.28	320.15	194.644	300.68	44.1174	325.92	1472.61	316.92	186.529	299.64	40.7854
320.5	1701.55	305.42	1634.93	320.28	192.535	306.62	180.647	309.27	49.0336	323.1	1477.11	318.13	197.939	302.82	41.7207	327.56	1508.15	320.15	194.767	300.69	44.0822	325.93	1471.1	316.92	186.425	299.65	40.7526
320.51	1698.93	305.42	1634.81	320.28	192.629	306.62	180.675	309.28	49.0152	323.1	1477.85	318.14	197.873	302.82	41.7054	327.57	1505.92	320.15	194.767	300.69	44.0985	325.93	1471.7	316.92	186.359	299.66	40.7366
320.51	1697.48	305.43	1633.26	320.29	192.327	306.64	180.628	309.29	48.9979	323.11	1475.81	318.15	197.469	302.83	41.6917	327.57	1506.69	320.15	194.795	300.7	44.0621	325.94	1469.93	316.94	185.793	299.67	40.6997
320.53	1695.05	305.43	1633.88	320.29	192.403	306.65	179.967	309.29	48.9783	323.11	1476.51	318.16	197.412	302.83	41.6749	327.58	1504.94	320.15	194.823	300.71	44.0432	325.94	1470.59	316.94	185.878	299.67	40.7172
320.52	1693.49	305.43	1634.68	320.3	192.261	306.66	179.891	309.3	48.9584	323.12	1474.4	318.17	197.356	302.84	41.6608	327.58	1505.34	320.16	194.654	300.72	44.0046	325.95	1468.56	316.96	185.765	299.68	40.6818
320.54	1691.5	305.44	1631.32	320.31	192.111	306.66	179.835	309.31	48.9385	323.12	1475.12	318.18	196.979	302.84	41.6481	327.59	1503.81	320.17	194.362	300.72	44.0228	325.95	1469.29	316.96	185.718	299.69	40.6487
320.53	1689.29	305.44	1631.94	320.31	192.158	306.67	179.75	309.32	48.9215	323.13	1473.08	318.18	197.073	302.86	41.6314	327.59	1504.43	320.17	194.682	300.73	43.9846	325.96	1467.09	316.97	185.387	299.69	40.6662
320.55	1688.41	305.44	1632.5	320.31	192.243	306.67	179.702	309.32	48.9012	323.13	1473.8	318.19	196.631	302.86	41.618	327.6	1502.29	320.18	194.475	300.74	43.9675	325.96	1467.93	316.97	185.123	299.7	40.6319
320.55	1688	305.45	1629.54	320.31	192.28	306.67	179.599	309.33	48.8809	323.14	1471.61	318.19	196.716	302.87	41.605	327.6	1503.12	320.2	194.089	300.75	43.946	325.97	1465.33	316.97	185.019	299.71	40.598
320.56	1687.77	305.45	1630.55	320.32	192.054	306.68	179.504	309.33	48.8566	323.14	1472.44	318.19	196.857	302.87	41.5916	327.61	1500.78	320.2	194.183	300.76	43.9092	325.97	1466.31	316.98	184.981	299.71	40.6151
320.56	1687.25	305.46	1629.4	320.32	192.082	306.68	179.476	309.34	48.8374	323.15	1468.8	318.19	196.913	302.88	41.5793	327.61	1501.59	320.21	193.834	300.76	43.9282	325.98	1463.8	316.97	184.915	299.72	40.582
320.57	1686.93	305.46	1628.92	320.33	191.819	306.69	179.513	309.35	48.8189	323.15	1470.1	318.2	196.537	302.88	41.5651	327.62	1499.24	320.21	193.919	300.77	43.8688	325.98	1464.6	316.97	184.868	299.73	40.5462
320.57	1686.52	305.47	1626.92	320.33	191.932	306.69	179.494	309.36	48.8016	323.15	1470.87	318.21	196.433	302.9	41.5454	327.62	1500.25	320.23	193.458	300.77	43.8922	325.99	1462.37	316.97	185.359	299.73	40.5633
320.58	1687.04	305.47	1627.62	320.34	191.696	306.71	179.447	309.37	48.7835	323.16	1467.8	318.22	196.226	302.9	41.5294	327.63	1496.39	320.23	193.58	300.78	43.8487	325.99	1462.16	316.98	185.189	299.74	40.5116
320.58	1686.65	305.47	1628.54	320.35	191.602	306.7	179.343	309.38	48.7625	323.16	1468.35	318.22	196.292	302.91	41.5089	327.63	1498.65	320.25	193.326	300.79	43.8268	325.99	1463.11	316.98	185.142	299.74	40.5298
320.59	1686.27	305.48	1625.44	320.36	191.573	306.72	179.277	309.38	48.7389	323.16	1469.54	318.23	196.113	302.91	41.4967	327.64	1494.88	320.25	193.373	300.8	43.783	326	1461.16	316.99	185.312	299.75	40.4948
320.59	1685.99	305.48	1626.19	320.37	191.385	306.71	179.239	309.39	48.7186	323.17	1466.78	318.24	196.047	302.93	41.478	327.64	1495.71	320.26	193.156	300.8	43.8072	326	1461.77	317	185.151	299.76	40.4627
320.6	1685.54	305.49	1623.09	320.37	191.508	306.72	179.249	309.4	48.6983	323.17	1467.31	318.25	195.708	302.92	41.4628	327.65	1492.19	320.26	193.232	300.81	43.7626	326.01	1459.73	317.01	185.01	299.76	40.4776
320.6	1685.63	305.49	1623.94	320.39	191.244	306.72	179.173	309.4	48.6795	323.18	1465.71	318.25	195.869	302.94	41.4479	327.65	1493.32	320.27	192.93	300.82	43.7415	326.01	1460.41	317.02	184.934	299.77	40.446
320.61	1685.56	305.49	1624.56	320.39	191.338	306.74	178.994	309.41	48.6673	323.19	1466.37	318.25	195.953	302.94	41.4211	327.65	1494.19	320.27	193.024	300.83	43.7244	326.02	1457.22	317.04	184.802	299.78	40.4318
320.61	1685.32	305.5	1622.53	320.4	190.923	306.73	178.89	309.42	48.647	323.2	1465.29	318.25	196.01	302.95	41.4017	327.66	1489.65	320.28	192.817	300.84	43.6906	326.02	1458.39	317.04	184.208	299.79	40.3994
320.62	1684.87	305.51	1619.96	320.4	191.018	306.74	178.776	309.43	48.6278	323.2	1465.11	318.26	195.577	302.95	41.3868	327.66	1490.59	320.28	192.855	300.85	43.6516	326.02	1458.94	317.05	184.425	299.79	40.4132
320.62	1684.38	305.51	1620.56	320.4	191.074	306.75	178.909	309.44	48.6112	323.21	1464.33	318.26	195.812	302.96	41.3444	327.66	1491.42	320.29	192.676	300.85	43.672	326.03	1456.47	317.05	184.396	299.8	40.3655
320.63	1683.91	305.51	1621.29	320.4	191.187	306.77	179.173	309.45	48.5905	323.21	1464.8	318.26	195.925	302.96	41.3306	327.67	1488.21	320.29	192.996	300.86	43.6327	326.03	1457.79	317.06	184.33	299.8	40.3811
320.63	1683.78	305.51	1621.89	320.41	190.839	306.78	179.23	309.45	48.5773	323.22	1463.88	318.26	196.038	302.98	41.3128	327.67	1488.93	320.3	192.657	300.87	43.613	326.04	1454.55	317.07	184.396	299.81	40.3476
320.64	1683.1	305.52	1619.19	320.42	190.801	306.79	179.041	309.46	48.5599	323.22	1464.54	318.27	195.398	302.97	41.2994	327.68	1486.91	320.3	192.742	300.88	43.5692	326.04	1455.09	317.08	184.387	299.82	40.3327
320.64	1682.22	305.53	1617.51	320.43	190.707	306.8	178.994	309.47	48.5429	323.23	1462.82	318.27	195.577	302.99	41.2826	327.68	1487.69	320.31	192.309	300.88	43.5941	326.04	1455.77	317.08	184.613	299.83	40.2965
320.65	1681.41	305.53	1618.53	320.45	190.49	306.82	178.937	309.48	48.526	323.23	1463.26	318.28	195.304	302.99	41.2692	327.69	1485.39	320.31	192.629	300.9	43.5265	326.05	1453.32	317.08	184.802	299.83	40.3122
320.65	1680.35	305.54	1616.1	320.45	190.565	306.83	179.268	309.48	48.5068	323.24	1462.33	318.3	195.191	303	41.2558	327.69	1486.25	320.31	192.657	300.9	43.5499	326.05	1453.9	317.09	184.868	299.84	40.2831
320.66	1679.35	305.54	1616.86	320.47	190.235	306.84	179.107	309.49	48.485	323.24	1463.01	318.31	195.078	303	41.2424	327.7	1483.88	320.32	192.412	300.91	43.4786	326.06	1451.81	317.09	184.83	299.85	40.2697
320.66	1678.28	305.55	1614.36	320.47	190.358	306.84	178.842	309.5	48.4676	323.25	1461.69	318.32	195.031	303.01	41.2275	327.7	1484.65	320.32	192.488	300.91	43.5024	326.06	1452.47	317.1	184.802	299.86	40.2331
320.67	1677.36	305.55	1615.37	320.49	189.981	306.85	178.341	309.51	48.4485	323.25	1462.35	318.34	195.002	303.01	41.2141	327.71	1482.52	320.33	192.233	300.93	43.4411	326.08	1449.49	317.1	184.764	299.86	40.2507
320.67	1676.48	305.56	1612.84	320.49	190.065	306.86	178.133	309.51	48.4304	323.26	1460.43	318.35	194.955	303.02	41.2119	327.71	1483.28	320.34	192.026	300.93	43.4626	326.08	1450.28	317.11	184.802	299.87	40.2167
320.68	1676.31	305.56	1613.68	320.5	189.538	306.87	178.077	309.52	48.413	323.26	1461.15	318.36	194.776	303.02	41.1951	327.72	1481.51	320.34	192.158	300.94	43.4025	326.08	1450.92	317.11	184.896	299.88	40.2067
320.68	1676.14	305.57	1611.33	320.5	189.717	306.87	178.152	309.52	48.3942	323.27	1459.02	318.37	194.616	303.04	41.1769	327.72	1481.99	320.35	192.243	300.94	43.4222	326.09	1448.21	317.13	184.547	299.88	40.2041
320.68	1675.78	305.57	1612.08	320.51	190.188	306.88	178.625	309.53	48.3713	323.27	1459.81	318.37	194.729	303.04	41.1616	327.73	1480.49	320.36	192.111	300.96	43.3631	326.09	1448.83	317.13	184.462	299.89	40.1731
320.69	1674.79	305.58	1610.77	320.51	190.263	306.88	178.162	309.54	48.3617	323.28	1457.73	318.38	194.673	303.05	41.1419	327.73	1481	320.38	192.026	300.96	43.385	326.1	1447.76	317.14	184.491	299.89	40.191
320.69	1674.49	305.59	1610.09	320.51	190.263	306.88	178.095	309.55	48.3406	323.28	1458.45	318.38	194.767	303.05	41.1296	327.74	1479.51	320.38	192.092	300.97	43.3438	326.11	1444.98	317.15	184.434	299.9	40.1601
320.7	1674.19	305.59	1610.82	320.51	190.15	306.89	178.058	309.56	48.3229	323.29	1455.58	318.39	194.362	303.07	41.1143	327.74	1480.07	320.4	191.658	300.98	43.3245	326.11	1445.61	317.15	184.415	299.91	40.125
320.7	1673.83	305.59	1610.71	320.51	189.66	306.89	178.048	309.56	48.2986	323.29	1456.22	318.39	194.522	303.06	41.0994	327.75	1478.22	320.4	191.715	300.99	43.2877	326.11	1446.4	317.16	184.566	299.91	40.1418
320.7	1673.46	305.6	1607.71	320.51	189.83	306.89	178.077	309.57	48.279	323.29	1457.02	318.4	194.155	303.08	41.08	327.75	1478.92	320.4	191.8	300.99	43.3081	326.11	1447.04	317.17	184.434	299.92	40.1086
320.71	1673.06	305.6	1609.41	320.52	190.084	306.9	177.906	309.58	48.2513	323.3	1454.2	318.41	194.07	303.08	41.0637	327.76	1476.85	320.4	191.903	301	43.2688	326.12	1443.64	317.17	184.425	299.93	40.0754
320.71	1672.26	305.61	1605.88	320.53	190.433	306.89	177.661	309.58	48.2306	323.3	1454.85	318.41	194.258	303.09	41.0473	327.76	1477.6	320.41	191.215	301.01	43.2569	326.12	1444.29	317.17	184.453	299.93	40.0933
320.72	1671.95	305.61	1606.65	320.54	190.405	306.9	177.046	309.59	48.2088	323.31	1453.06	318.42	193.712	303.09	41.0491	327.77	1475.3	320.42	191.121	301.02	43.219	326.13	1442.27	317.17	184.434	299.94	40.0635
320.72	1671.5	305.62	1604.61	320.55	190.376	306.89	176.98	309.6	48.1926	323.31	1453.56	318.42	194.07	303.1	41.0294	327.77	1476.23	320.43	190.961	301.02	43.2417	326.13	1442.89	317.18	184.226	299.95	40.0307
320.72	1670.79	305.62	1605.32	320.56	190.113	306.9	176.999	309.61	48.1694	323.32	1450.96	318.43	193.665	303.1	41.0145	327.78	1473.34	320.44	190.857	301.03	43.1804	326.14	1439.55	317.18	184.16	299.95	40.0467
320.73	1670.75	305.63	1602.05	320.58	189.915	306.9	177.169	309.61	48.1498	323.32	1451.72	318.43	193.674	303.12	41.0056	327.78	1473.85	320.44	190.876	301.03	43.2019	326.14	1440.1	317.18	184.16	299.96	40.0102
320.73	1670.12	305.63	1603.08	320.59	189.094	306.9	177.103	309.62	48.1291	323.32	1452.38	318.43	193.816	303.12	40.991	327.78	1474.62	320.46	190.688	301.05	43.1365	326.14	1440.81	317.18	184.094	299.97	39.9762
320.74	1669.38	305.63	1603.82	320.59	189.17	306.9	177.008	309.63	48.1095	323.33	1449.75	318.44	193.26	303.13	40.9709	327.79	1472.23	320.46	190.82	301.05	43.1607	326.14	1441.49	317.2	183.971	299.97	39.9964
320.74	1667.41	305.64	1600.6	320.59	189.707	306.9	177.018	309.64	48.0889	323.33	1450.38	318.44	193.524	303.13	40.9553	327.79	1472.63	320.48	190.405	301.06	43.0938	326.15	1438.38	317.2	183.868	299.98	39.9613
320.75	1666.57	305.64	1601.58	320.59	189.802	306.9	176.98	309.64	48.0711	323.34	1447.89	318.44	193.627	303.14	40.9355	327.8	1470.76	320.48	190.471	301.06	43.1172	326.15	1438.96	317.22	183.764	299.99	39.9304
320.76	1664.49	305.64	1602.5	320.6	189.113	306.91	176.857	309.65	48.0504	323.34	1448.55	318.45	193.024	303.14	40.921	327.8	1471.44	320.48	190.593	301.08	43.0686	326.16	1437.76	317.22	183.669	299.99	39.9445
320.76	1663.08	305.65	1599.29	320.6	189.632	306.92	176.8	309.66	48.0327	323.34	1449.19	318.45	193.072	303.15	40.905	327.81	1468.72	320.49	190.037	301.08	43.0752	326.16	1437.68	317.24	183.566	300	39.9128
320.77	1660.13	305.65	1600	320.61	188.746	306.93	176.734	309.66	48.0095	323.35	1447.11	318.45	193.147	303.16	40.8927	327.81	1469.27	320.49	190.113	301.09	43.0518	326.17	1435.81	317.25	183.462	300.01	39.8979
320.77	1658.91	305.66	1598.07	320.61	188.463	306.93	176.479	309.67	47.9903	323.36	1445.77	318.45	193.477	303.17	40.8752	327.81	1469.84	320.49	190.207	301.1	43.0336	326.17	1437.21	317.26	183.32	300.02	39.8651
320.78	1656.32	305.66	1598.74	320.62	188.689	306.94	176.46	309.68	47.9703	323.36	1446.55	318.46	192.751	303.17	40.8592	327.82	1468.37	320.49	190.32	301.11	42.9976	326.18	1434.61	317.26	183.254	300.02	39.88
320.79	1654.46	305.67	1596.6	320.63	188.68	306.95	176.394	309.68	47.9533	323.37	1445.17	318.46	192.836	303.18	40.8439	327.83	1467.31	320.49	190.367	301.11	43.0165	326.18	1435.15	317.27	183.16	300.03	39.8476
320.79	1652.15	305.67	1597.44	320.64	188.453	306.95	176.328	309.69	47.9323	323.38	1442.98	318.47	192.619	303.19	40.8309	327.83	1467.76	320.5	189.679	301.12	42.9846	326.19	1434.21	317.27	183.103	300.04	39.8327
320.8	1650.09	305.68	1595.41	320.64	188.661	306.96	176.384	309.69	47.9134	323.38	1443.76	318.48	192.695	303.2	40.8141	327.84	1466.03	320.5	189.783	301.13	42.9467	326.2	1432.53	317.27	182.99	300.05	39.8036
320.8	1647.63	305.68	1596	320.64	188.632	306.97	176.384	309.7	47.8843	323.38	1444.42	318.49	192.44	303.2	40.7992	327.84	1466.67	320.5	189.849	301.13	42.9656	326.2	1433.15	317.28	182.886	300.05	39.8174
320.81	1646	305.69	1593.78	320.65	187.887	306.99	176.337	309.71	47.8676	323.39	1442.02	318.49	192.544	303.21	40.7843	327.85	1464.82	320.5	189.981	301.14	42.9237	326.2	1433.78	317.27	182.593	300.06	39.7864
320.82	1643.99	305.69	1594.74	320.65	188.557	306.99	176.242	309.72	47.844	323.39	1442.36	318.51	192.337	303.21	40.7716	327.85	1465.31	320.5	189.981	301.15	42.9055	326.21	1431.23	317.29	182.423	300.07	39.7521
320.82	1642.58	305.7	1592.28	320.66	188.368	307.01	176.167	309.72	47.8233	323.4	1439.72	318.51	192.337	303.22	40.7537	327.86	1463.67	320.51	189.481	301.16	42.8824	326.21	1431.76	317.29	182.234	300.07	39.7704
320.83	1640.65	305.71	1591.02	320.67	187.689	307.02	176.082	309.73	47.7993	323.4	1440.49	318.51	192.403	303.23	40.737	327.86	1464.26	320.51	189.613	301.17	42.8646	326.22	1429.81	317.31	182.073	300.08	39.7383
320.83	1639.51	305.71	1593.05	320.67	187.784	307.04	176.006	309.74	47.7779	323.4	1441.4	318.51	192.431	303.24	40.721	327.87	1461.56	320.51	189.952	301.18	42.8282	326.22	1430.44	317.31	181.894	300.09	39.7073
320.83	1637.78	305.72	1589.93	320.68	187.501	307.05	175.874	309.74	47.7583	323.41	1438.47	318.51	192.506	303.24	40.7086	327.87	1462.18	320.52	189.358	301.18	42.8441	326.23	1427.55	317.32	181.696	300.09	39.723
[truncated: 28,885 more rows]
